# Supplementary material
Source: publisher figshare collection journal article supplement (https://gsapubs.figshare.com/ndownloader/files/23303306)
Supplement: Supplementary file 1 [file 23303306]

## Sheet: P2N
X (microns)	Y (microns)	A4520 (OH)	A5230 (H2Om)	A2350 (CO2)	thickness (mm)	[OH] wt%	[H2Om] wt%	[H2Ot] wt%	[CO2] ppm	Q (K/s)
0	0	0.101378	0.0756652	0.0881255	0.55	0.868073	0.580146	1.44822	25.5099	0.0522709
100	0	0.100911	0.0741215	0.0933188	0.55	0.864298	0.56831	1.43261	27.0132	0.0556402
200	0	0.100347	0.0724605	0.0999698	0.55	0.859594	0.555574	1.41517	28.9385	0.0584448
300	0	0.100105	0.0721133	0.103727	0.55	0.857335	0.552912	1.41025	30.0261	0.0564068
400	0	0.0999498	0.0696613	0.099497	0.55	0.85737	0.534112	1.39148	28.8016	0.0791041
500	0	0.0997037	0.06944	0.0920469	0.55	0.854983	0.532415	1.3874	26.645	0.0748462
600	0	0.0996631	0.0693821	0.0836916	0.55	0.854603	0.531971	1.38657	24.2264	0.0744252
700	0	0.0993196	0.0685727	0.0771267	0.55	0.851603	0.525765	1.37737	22.326	0.0748517
800	0	0.0991625	0.0675562	0.07558	0.55	0.850658	0.517972	1.36863	21.8783	0.0837184
900	0	0.0987416	0.0667521	0.0748912	0.55	0.846858	0.511806	1.35866	21.6789	0.0819896
1000	0	0.0980496	0.0661084	0.0783993	0.55	0.840171	0.506871	1.34704	22.6944	0.0705451
1100	0	0.0987325	0.0657485	0.0842077	0.55	0.847423	0.504112	1.35153	24.3758	0.0971416
1200	0	0.0979626	0.0654946	0.0892681	0.55	0.839679	0.502165	1.34184	25.8406	0.0759832
1300	0	0.0984046	0.0652847	0.0929793	0.55	0.844356	0.500556	1.34491	26.9149	0.0931442
1400	0	0.098349	0.0657576	0.0982201	0.55	0.843474	0.504181	1.34766	28.432	0.0839869
1500	0	0.0986981	0.0668326	0.099283	0.55	0.846358	0.512424	1.35878	28.7397	0.0795546
1600	0	0.0991781	0.0676851	0.098506	0.55	0.850733	0.51896	1.36969	28.5148	0.0823946
1700	0	0.0999117	0.0690934	0.0974796	0.55	0.857355	0.529758	1.38711	28.2176	0.0856181
1800	0	0.10037	0.0692136	0.0950943	0.55	0.862	0.530679	1.39268	27.5272	0.0994115
0	100	0.100467	0.073027	0.10033	0.55	0.860452	0.559918	1.42037	29.0428	0.0559026
100	100	0.100206	0.0722895	0.104905	0.55	0.85826	0.554264	1.41252	30.367	0.0569689
200	100	0.0998945	0.0709245	0.101925	0.55	0.855962	0.543797	1.39976	29.5045	0.0630925
300	100	0.100139	0.0700699	0.0966915	0.55	0.859043	0.537245	1.39629	27.9895	0.0793743
400	100	0.0996715	0.0692436	0.0883542	0.55	0.854781	0.53091	1.38569	25.5761	0.0763836
500	100	0.0992696	0.0684013	0.0795061	0.55	0.851203	0.524451	1.37565	23.0148	0.0755986
600	100	0.0987664	0.0679673	0.0745115	0.55	0.846315	0.521124	1.36744	21.569	0.0672901
700	100	0.0988675	0.0672747	0.0774853	0.55	0.847809	0.515813	1.36362	22.4299	0.0786208
800	100	0.0985124	0.0666171	0.0800151	0.55	0.844591	0.510771	1.35536	23.1622	0.0769756
900	100	0.0983802	0.0658985	0.0859435	0.55	0.843703	0.505262	1.34896	24.8783	0.082923
1000	100	0.0983681	0.0655715	0.0907602	0.55	0.843792	0.502755	1.34655	26.2726	0.0873829
1100	100	0.0978685	0.0653852	0.0927316	0.55	0.838784	0.501326	1.34011	26.8432	0.0747378
1200	100	0.0979032	0.0659903	0.094444	0.55	0.838746	0.505966	1.34471	27.3389	0.0681082
1300	100	0.0987607	0.0662595	0.0957922	0.55	0.847377	0.508029	1.35541	27.7292	0.0898737
1400	100	0.0990943	0.067278	0.0998452	0.55	0.850139	0.515839	1.36598	28.9024	0.085549
1500	100	0.0996623	0.0681716	0.100936	0.55	0.855397	0.52269	1.37809	29.2182	0.0909463
1600	100	0.0999624	0.0696121	0.101995	0.55	0.857533	0.533735	1.39127	29.5247	0.0801179
1700	100	0.100797	0.0700433	0.0997769	0.55	0.865854	0.537041	1.40289	28.8826	0.101588
1800	100	0.101206	0.071686	0.0966074	0.55	0.868977	0.549636	1.41861	27.9652	0.0907659
0	200	0.100105	0.0716195	0.104908	0.55	0.85767	0.549127	1.4068	30.368	0.0610499
100	200	0.100243	0.0702743	0.10097	0.55	0.859985	0.538812	1.3988	29.228	0.0798174
200	200	0.0992629	0.0695286	0.0948767	0.55	0.850389	0.533095	1.38348	27.4642	0.0625135
300	200	0.0990614	0.0687145	0.0848237	0.55	0.848855	0.526853	1.37571	24.5541	0.0663382
400	200	0.0989465	0.0676792	0.0775736	0.55	0.848356	0.518915	1.36727	22.4554	0.0756174
500	200	0.0987119	0.0679702	0.0754043	0.55	0.845753	0.521146	1.3669	21.8275	0.0658836
600	200	0.0985754	0.0667446	0.0802949	0.55	0.845154	0.511749	1.3569	23.2432	0.077116
700	200	0.0986651	0.0666993	0.0862973	0.55	0.846107	0.511402	1.35751	24.9807	0.0803913
800	200	0.0978618	0.0656097	0.091968	0.55	0.83857	0.503048	1.34162	26.6222	0.0716631
900	200	0.0981038	0.0645839	0.0960976	0.55	0.841722	0.495182	1.3369	27.8176	0.0941011
1000	200	0.0980778	0.0653082	0.0947645	0.55	0.840983	0.500736	1.34172	27.4317	0.0820123
1100	200	0.0984893	0.0653009	0.0928836	0.55	0.845215	0.50068	1.3459	26.8872	0.0958769
1200	200	0.0987599	0.0664194	0.0942818	0.55	0.847265	0.509256	1.35652	27.292	0.087409
1300	200	0.0991467	0.067542	0.0994511	0.55	0.850504	0.517863	1.36837	28.7883	0.0834258
1400	200	0.0996853	0.0686009	0.104773	0.55	0.855349	0.525982	1.38133	30.3288	0.0853968
1500	200	0.100331	0.0697304	0.104951	0.55	0.861254	0.534642	1.3959	30.3805	0.0900698
1600	200	0.100603	0.0712254	0.0984599	0.55	0.863061	0.546105	1.40917	28.5014	0.078244
1700	200	0.101966	0.0729013	0.0940472	0.55	0.876018	0.558954	1.43497	27.2241	0.0989827
1800	200	0.102299	0.0738279	0.0914553	0.55	0.878838	0.566059	1.4449	26.4738	0.0968439
0	300	0.0992464	0.0695698	0.0949373	0.55	0.850193	0.533411	1.3836	27.4817	0.0617043
100	300	0.0990435	0.0693786	0.0897068	0.55	0.848233	0.531945	1.38018	25.9676	0.0589865
200	300	0.0990865	0.0677935	0.0805686	0.55	0.849719	0.519791	1.36951	23.3224	0.0781718
300	300	0.0985378	0.0685155	0.0773669	0.55	0.843608	0.525327	1.36893	22.3956	0.0562402
400	300	0.0990074	0.0680386	0.078796	0.55	0.848745	0.521671	1.37042	22.8093	0.0728121
500	300	0.0985936	0.0672253	0.0841111	0.55	0.845026	0.515435	1.36046	24.3478	0.0715092
600	300	0.0980444	0.0669283	0.0906153	0.55	0.839584	0.513158	1.35274	26.2306	0.0610768
700	300	0.0981539	0.066445	0.0969289	0.55	0.841023	0.509452	1.35047	28.0582	0.0692308
800	300	0.0978337	0.0652722	0.0986039	0.55	0.838501	0.50046	1.33896	28.5431	0.0752383
900	300	0.0980801	0.0669083	0.0957971	0.55	0.839963	0.513004	1.35297	27.7306	0.0621285
1000	300	0.0984416	0.0664527	0.0949647	0.55	0.843971	0.509511	1.35348	27.4896	0.0771001
1100	300	0.0989175	0.0680119	0.0959113	0.55	0.847838	0.521466	1.3693	27.7636	0.0707055
1200	300	0.0992273	0.0686053	0.104545	0.55	0.850633	0.526016	1.37665	30.2628	0.0719126
1300	300	0.100545	0.0694148	0.107252	0.55	0.863678	0.532222	1.3959	31.0466	0.102599
1400	300	0.100975	0.0714409	0.104039	0.55	0.866754	0.547757	1.41451	30.1165	0.0866971
1500	300	0.101286	0.0725387	0.0983978	0.55	0.869229	0.556174	1.4254	28.4834	0.0817417
1600	300	0.101636	0.0736942	0.0932503	0.55	0.872072	0.565034	1.43711	26.9934	0.0776894
1700	300	0.10263	0.0751592	0.0903249	0.55	0.881357	0.576266	1.45762	26.1466	0.0892331
1800	300	0.103603	0.0769125	0.0916033	0.55	0.890246	0.589709	1.47995	26.5166	0.0976302
0	400	0.0994782	0.0691033	0.0833676	0.55	0.852885	0.529834	1.38272	24.1326	0.072726
100	400	0.0992739	0.0687383	0.0767209	0.55	0.851024	0.527036	1.37806	22.2086	0.0715761
200	400	0.0987827	0.0673539	0.0784981	0.55	0.846885	0.51642	1.36331	22.723	0.0751317
300	400	0.0984754	0.0678915	0.0826291	0.55	0.843376	0.520542	1.36392	23.9188	0.0610381
400	400	0.0979295	0.0666482	0.0891378	0.55	0.838588	0.51101	1.3496	25.8029	0.0613538
500	400	0.0984591	0.0668547	0.0957389	0.55	0.843888	0.512593	1.35648	27.7138	0.0724203
600	400	0.0981966	0.0659127	0.0993768	0.55	0.841808	0.505371	1.34718	28.7668	0.0771779
700	400	0.0979686	0.0653955	0.0990046	0.55	0.839805	0.501405	1.34121	28.6591	0.0774919
800	400	0.0984547	0.0658878	0.0947467	0.55	0.844475	0.50518	1.34965	27.4265	0.0854421
900	400	0.0987287	0.0668092	0.0963953	0.55	0.846688	0.512244	1.35893	27.9038	0.080799
1000	400	0.0992367	0.0687125	0.102542	0.55	0.850658	0.526837	1.3775	29.6829	0.0708862
1100	400	0.0995166	0.0700907	0.106275	0.55	0.852627	0.537404	1.39003	30.7637	0.0627048
1200	400	0.100632	0.0709785	0.106637	0.55	0.863522	0.544211	1.40773	30.8683	0.0822638
1300	400	0.100653	0.0712345	0.101252	0.55	0.863571	0.546174	1.40975	29.3096	0.0795899
1400	400	0.101354	0.0731659	0.096448	0.55	0.869512	0.560983	1.43049	27.919	0.076012
1500	400	0.102064	0.0747147	0.0928806	0.55	0.875798	0.572858	1.44866	26.8864	0.0777044
1600	400	0.102685	0.0756631	0.0926524	0.55	0.88158	0.58013	1.46171	26.8203	0.0844109
1700	400	0.103475	0.0776559	0.0920285	0.55	0.888408	0.595409	1.48382	26.6397	0.0837277
1800	400	0.104432	0.0791217	0.09266	0.55	0.89733	0.606648	1.50398	26.8225	0.0954757
0	499.9	0.0987285	0.0684984	0.0757143	0.55	0.845577	0.525196	1.37077	21.9172	0.0606462
100	499.9	0.0988024	0.0670399	0.0796247	0.55	0.847294	0.514014	1.36131	23.0491	0.0798531
200	499.9	0.0984776	0.067044	0.0865341	0.55	0.843954	0.514044	1.358	25.0492	0.070597
300	499.9	0.0980104	0.0662247	0.0951411	0.55	0.839694	0.507763	1.34746	27.5407	0.0681096
400	499.9	0.0981265	0.0663216	0.100988	0.55	0.840822	0.508506	1.34933	29.2331	0.0699953
500	499.9	0.0982221	0.066029	0.101713	0.55	0.841994	0.506262	1.34826	29.443	0.0763646
600	499.9	0.0981613	0.0659185	0.0991121	0.55	0.841442	0.505415	1.34686	28.6902	0.0760766
700	499.9	0.0981432	0.0663168	0.0969647	0.55	0.840996	0.508469	1.34947	28.0686	0.0704984
800	499.9	0.098856	0.0678137	0.0978588	0.55	0.847336	0.519946	1.36728	28.3274	0.0714371
900	499.9	0.0997904	0.0683154	0.101751	0.55	0.856622	0.523793	1.38041	29.4541	0.0931082
1000	499.9	0.100492	0.0704043	0.102903	0.55	0.862465	0.539809	1.40227	29.7876	0.0856888
1100	499.9	0.100861	0.0713213	0.0998065	0.55	0.865661	0.54684	1.4125	28.8912	0.0847494
1200	499.9	0.101159	0.0723155	0.0970828	0.55	0.868074	0.554463	1.42254	28.1028	0.0808179
1300	499.9	0.102133	0.074254	0.0937174	0.55	0.876822	0.569326	1.44615	27.1286	0.0854457
1400	499.9	0.102353	0.0752072	0.090713	0.55	0.878453	0.576634	1.45509	26.2589	0.0801337
1500	499.9	0.102678	0.0767855	0.0933599	0.55	0.880746	0.588735	1.46948	27.0251	0.071306
1600	499.9	0.103918	0.0787628	0.0935553	0.55	0.892234	0.603896	1.49613	27.0817	0.0836694
1700	499.9	0.104445	0.0801532	0.0917409	0.55	0.896744	0.614557	1.5113	26.5565	0.0829688
1800	499.9	0.105748	0.0821527	0.0918296	0.55	0.908909	0.629887	1.5388	26.5821	0.0997672
0	599.8	0.0986264	0.0671104	0.0837714	0.55	0.845439	0.514554	1.35999	24.2495	0.0738367
100	599.8	0.0985855	0.0670786	0.0931815	0.55	0.845039	0.51431	1.35935	26.9735	0.0731016
200	599.8	0.0984822	0.0665427	0.101507	0.55	0.844329	0.510201	1.35453	29.3833	0.0770829
300	599.8	0.0980042	0.0658012	0.104803	0.55	0.839906	0.504516	1.34442	30.3375	0.0731557
400	599.8	0.0977011	0.0658155	0.10326	0.55	0.836788	0.504625	1.34141	29.8909	0.065011
500	599.8	0.0980537	0.0662702	0.101358	0.55	0.840108	0.508112	1.34822	29.3402	0.0686949
600	599.8	0.0984307	0.0678825	0.0996155	0.55	0.842924	0.520474	1.3634	28.8359	0.0601011
700	599.8	0.0986561	0.0687808	0.0998287	0.55	0.844649	0.527361	1.37201	28.8976	0.0562647
800	599.8	0.0995776	0.0694229	0.102649	0.55	0.853697	0.532284	1.38598	29.7141	0.0716017
900	599.8	0.100234	0.0711374	0.101707	0.55	0.859314	0.54543	1.40474	29.4412	0.0691992
1000	599.8	0.10079	0.0724448	0.0982165	0.55	0.864173	0.555454	1.41963	28.4309	0.0691012
1100	599.8	0.101114	0.0740087	0.0942975	0.55	0.866471	0.567445	1.43392	27.2965	0.0610677
1200	599.8	0.101733	0.0752159	0.0933806	0.55	0.872037	0.576701	1.44874	27.0311	0.0637973
1300	599.8	0.1026	0.0766757	0.0953458	0.55	0.880009	0.587894	1.4679	27.6	0.0704316
1400	599.8	0.102627	0.0778839	0.0948784	0.55	0.879468	0.597157	1.47663	27.4647	0.0595724
1500	599.8	0.103463	0.0796778	0.0942586	0.55	0.886891	0.610912	1.4978	27.2852	0.0623743
1600	599.8	0.104201	0.0818846	0.0945652	0.55	0.893012	0.627831	1.52084	27.374	0.0597812
1700	599.8	0.105439	0.0836355	0.092696	0.55	0.904644	0.641256	1.5459	26.8329	0.073309
1800	599.8	0.106013	0.0855876	0.0863256	0.55	0.909245	0.656223	1.56547	24.9889	0.0693662
0	700	0.0975437	0.0669172	0.101962	0.55	0.83446	0.513072	1.34753	29.5151	0.0504848
100	700	0.0976343	0.0667876	0.105657	0.55	0.835473	0.512079	1.34755	30.5849	0.0534729
200	700	0.0976915	0.0667498	0.107885	0.55	0.836083	0.511789	1.34787	31.2297	0.0550227
300	700	0.0973524	0.0673266	0.107622	0.55	0.832238	0.516212	1.34845	31.1536	0.0436624
400	700	0.0981265	0.06777	0.105285	0.55	0.839877	0.519611	1.35949	30.4769	0.0545427
500	700	0.0987248	0.0679437	0.102763	0.55	0.845903	0.520943	1.36685	29.7472	0.0665053
600	700	0.0992313	0.0696167	0.102701	0.55	0.850007	0.53377	1.38378	29.729	0.0608807
700	700	0.0993908	0.0703756	0.104486	0.55	0.851145	0.539589	1.39073	30.2458	0.0570735
800	700	0.100204	0.0713885	0.102867	0.55	0.858841	0.547355	1.4062	29.7772	0.0657365
900	700	0.100959	0.0728292	0.0990512	0.55	0.865664	0.558401	1.42406	28.6726	0.0692662
1000	700	0.101286	0.0749834	0.0964833	0.55	0.867581	0.574918	1.4425	27.9292	0.0560285
1100	700	0.10211	0.0755791	0.097865	0.55	0.875694	0.579486	1.45518	28.3292	0.0693749
1200	700	0.102473	0.0767201	0.0993271	0.55	0.878672	0.588234	1.46691	28.7524	0.0668242
1300	700	0.102824	0.0785935	0.0984562	0.55	0.881017	0.602598	1.48361	28.5004	0.0577396
1400	700	0.103831	0.0804447	0.093705	0.55	0.89018	0.616792	1.50697	27.125	0.0639438
1500	700	0.103836	0.0815884	0.0933673	0.55	0.889436	0.62556	1.515	27.0272	0.0545864
1600	700	0.104852	0.0844588	0.0912378	0.55	0.897978	0.647569	1.54555	26.4108	0.0532686
1700	700	0.106709	0.0866366	0.0888459	0.55	0.915761	0.664266	1.58003	25.7184	0.0773244
1800	700	0.107131	0.0875046	0.0840118	0.55	0.919534	0.670921	1.59046	24.3191	0.0801471
0	800	0.0975336	0.0665306	0.106057	0.55	0.834608	0.510109	1.34472	30.7007	0.0537902
100	800	0.0971139	0.0664398	0.107036	0.55	0.830372	0.509412	1.33978	30.9839	0.0464524
200	800	0.0973351	0.0668523	0.108075	0.55	0.832368	0.512575	1.34494	31.2847	0.0470971
300	800	0.0979296	0.0678284	0.104155	0.55	0.837821	0.520059	1.35788	30.15	0.0500673
400	800	0.0988395	0.0681383	0.101551	0.55	0.846953	0.522435	1.36939	29.3961	0.067205
500	800	0.0991246	0.0697468	0.103055	0.55	0.848825	0.534768	1.38359	29.8316	0.0572288
600	800	0.0996055	0.0708093	0.103417	0.55	0.853065	0.542914	1.39598	29.9363	0.0576634
700	800	0.100478	0.071947	0.104649	0.55	0.861287	0.551638	1.41292	30.2929	0.0665791
800	800	0.101209	0.0738536	0.100794	0.55	0.867554	0.566256	1.43381	29.177	0.0647827
900	800	0.10123	0.075245	0.102188	0.55	0.866835	0.576924	1.44376	29.5806	0.0527416
1000	800	0.102348	0.0759999	0.104164	0.55	0.877864	0.582712	1.46058	30.1525	0.0710412
1100	800	0.102857	0.0770622	0.104586	0.55	0.882411	0.590857	1.47327	30.2749	0.0730602
1200	800	0.103477	0.0793524	0.100874	0.55	0.887257	0.608416	1.49567	29.2002	0.0656561
1300	800	0.104179	0.0805166	0.0964471	0.55	0.893735	0.617342	1.51108	27.9188	0.0717295
1400	800	0.104942	0.0826561	0.0937298	0.55	0.900173	0.633747	1.53392	27.1322	0.0701523
1500	800	0.10595	0.0849691	0.0884794	0.55	0.909031	0.651481	1.56051	25.6123	0.0735833
1600	800	0.106513	0.086072	0.0849508	0.55	0.914118	0.659937	1.57406	24.5909	0.0776544
1700	800	0.106281	0.0879565	0.0865733	0.55	0.910368	0.674386	1.58475	25.0606	0.0561793
1800	800	0.107473	0.0876277	0.0888479	0.55	0.923021	0.671865	1.59489	25.719	0.0888388
0	900	0.0975744	0.0667763	0.107119	0.55	0.834866	0.511992	1.34686	31.008	0.0523537
100	900	0.0982383	0.0663421	0.106067	0.55	0.841956	0.508663	1.35062	30.7033	0.0727698
200	900	0.0981166	0.0679701	0.101286	0.55	0.839645	0.521146	1.36079	29.3194	0.0525116
300	900	0.0986194	0.0688193	0.100157	0.55	0.844246	0.527656	1.3719	28.9928	0.0551246
400	900	0.0991564	0.070108	0.103015	0.55	0.848913	0.537537	1.38645	29.8201	0.0545716
500	900	0.100605	0.0709866	0.105589	0.55	0.863238	0.544274	1.40751	30.565	0.0813428
600	900	0.101513	0.0728925	0.107593	0.55	0.871342	0.558887	1.43023	31.1453	0.084075
700	900	0.101574	0.0751322	0.107428	0.55	0.870458	0.576059	1.44652	31.0975	0.060947
800	900	0.102603	0.0756712	0.108329	0.55	0.880732	0.580192	1.46092	31.3584	0.0818672
900	900	0.103342	0.0757679	0.107831	0.55	0.888327	0.580933	1.46926	31.2142	0.105226
1000	900	0.103587	0.0779893	0.104739	0.55	0.889342	0.597965	1.48731	30.319	0.0830658
1100	900	0.104865	0.0794171	0.0985224	0.55	0.901627	0.608913	1.51054	28.5195	0.106688
1200	900	0.104872	0.0801248	0.0928031	0.55	0.901208	0.614338	1.51555	26.8639	0.0969018
1300	900	0.105629	0.0829483	0.0912114	0.55	0.907113	0.635987	1.5431	26.4032	0.0859787
1400	900	0.106367	0.0836893	0.0889304	0.55	0.914272	0.641669	1.55594	25.7429	0.100744
1500	900	0.106987	0.0850888	0.0878681	0.55	0.919751	0.652399	1.57215	25.4354	0.103928
1600	900	0.105597	0.0866295	0.0846978	0.55	0.904187	0.664212	1.5684	24.5177	0.0522404
1700	900	0.10569	0.0863576	0.0834805	0.55	0.905349	0.662127	1.56748	24.1653	0.0559594
1800	900	0.10751	0.0868816	0.081025	0.55	0.923942	0.666145	1.59009	23.4545	0.0988848
0	1000	0.0982426	0.0669754	0.0993783	0.55	0.841587	0.513518	1.35511	28.7672	0.0653397
100	1000	0.0986974	0.0668636	0.0976762	0.55	0.84633	0.512661	1.35899	28.2745	0.0791112
200	1000	0.0997374	0.0683529	0.099025	0.55	0.856051	0.52408	1.38013	28.665	0.0907313
300	1000	0.100187	0.0702229	0.107214	0.55	0.859437	0.538418	1.39786	31.0356	0.0788202
400	1000	0.100419	0.0712401	0.110785	0.55	0.861159	0.546218	1.40738	32.0693	0.0729324
500	1000	0.100454	0.0728534	0.109079	0.55	0.86044	0.558587	1.41903	31.5754	0.0571845
600	1000	0.101818	0.0743909	0.108352	0.55	0.873473	0.570375	1.44385	31.3648	0.0746107
700	1000	0.102474	0.0755988	0.110872	0.55	0.879441	0.579636	1.45908	32.0944	0.078964
800	1000	0.103287	0.0767516	0.108645	0.55	0.88708	0.588475	1.47555	31.4496	0.089283
900	1000	0.104237	0.0786274	0.103651	0.55	0.895646	0.602858	1.4985	30.0042	0.0955669
1000	1000	0.10462	0.0794052	0.0979087	0.55	0.89909	0.608821	1.50791	28.3418	0.0980521
1100	1000	0.104618	0.0809857	0.092618	0.55	0.897966	0.620939	1.51891	26.8104	0.0785935
1200	1000	0.105672	0.0827057	0.0892137	0.55	0.907722	0.634128	1.54185	25.8249	0.0901526
1300	1000	0.106106	0.0846848	0.0885913	0.55	0.910855	0.649301	1.56016	25.6447	0.0806876
1400	1000	0.10722	0.0851817	0.0877755	0.55	0.922128	0.653111	1.57524	25.4086	0.111283
1500	1000	0.107432	0.0861828	0.0861493	0.55	0.92362	0.660787	1.58441	24.9378	0.105204
1600	1000	0.107001	0.0857389	0.0812819	0.55	0.919438	0.657384	1.57682	23.5288	0.0960258
1700	1000	0.106495	0.0842754	0.0749801	0.55	0.915194	0.646162	1.56136	21.7047	0.0974966
1800	1000	0.106256	0.0840173	0.076701	0.55	0.912888	0.644184	1.55707	22.2028	0.0928408
0	1100	0.0989118	0.0679343	0.0976131	0.55	0.84783	0.520871	1.3687	28.2563	0.0714826
100	1100	0.0993276	0.0690648	0.100141	0.55	0.851361	0.529539	1.3809	28.9881	0.0691719
200	1100	0.0996941	0.0700677	0.104557	0.55	0.854468	0.537228	1.3917	30.2663	0.0672788
300	1100	0.100246	0.0717404	0.109427	0.55	0.859034	0.550054	1.40909	31.676	0.0631064
400	1100	0.101059	0.0728563	0.112172	0.55	0.866676	0.558609	1.42529	32.4708	0.0715654
500	1100	0.101703	0.0740898	0.109237	0.55	0.872487	0.568066	1.44055	31.6211	0.0749019
600	1100	0.102107	0.0755041	0.108856	0.55	0.875706	0.578911	1.45462	31.5107	0.070064
700	1100	0.10279	0.0771703	0.104324	0.55	0.881635	0.591686	1.47332	30.1988	0.0701635
800	1100	0.104023	0.0790087	0.0991567	0.55	0.893158	0.605781	1.49894	28.7031	0.0838913
900	1100	0.104455	0.0798817	0.0896332	0.55	0.897043	0.612475	1.50952	25.9463	0.0865073
1000	1100	0.104815	0.0821486	0.0908896	0.55	0.899201	0.629856	1.52906	26.31	0.0718355
1100	1100	0.105475	0.0819113	0.0898571	0.55	0.906235	0.628036	1.53427	26.0111	0.0936955
1200	1100	0.105695	0.0830787	0.0858799	0.55	0.907702	0.636987	1.54469	24.8599	0.0864497
1300	1100	0.106149	0.0839037	0.086465	0.55	0.911853	0.643313	1.55517	25.0292	0.0907956
1400	1100	0.107382	0.0855881	0.085307	0.55	0.92353	0.656227	1.57976	24.694	0.111628
1500	1100	0.10637	0.0844815	0.0766053	0.55	0.913748	0.647743	1.56149	22.1751	0.0908689
1600	1100	0.106318	0.0842741	0.0766654	0.55	0.913353	0.646153	1.55951	22.1925	0.091709
1700	1100	0.106068	0.0828646	0.078863	0.55	0.911744	0.635346	1.54709	22.8287	0.10136
1800	1100	0.10611	0.0814717	0.0818352	0.55	0.913164	0.624666	1.53783	23.689	0.12403
0	1200	0.0995117	0.0687267	0.101025	0.55	0.853479	0.526946	1.38042	29.2438	0.0783937
100	1200	0.100033	0.0710122	0.107067	0.55	0.857326	0.54447	1.4018	30.9929	0.0655044
200	1200	0.100996	0.0727546	0.111649	0.55	0.866096	0.55783	1.42393	32.3194	0.0710441
300	1200	0.101052	0.0740295	0.111075	0.55	0.865815	0.567605	1.43342	32.153	0.0594807
400	1200	0.102068	0.074674	0.112575	0.55	0.875867	0.572546	1.44841	32.5874	0.0782995
500	1200	0.102781	0.0766998	0.106599	0.55	0.881874	0.588078	1.46995	30.8575	0.0749707
600	1200	0.103718	0.0777605	0.100257	0.55	0.890852	0.596211	1.48706	29.0217	0.089947
700	1200	0.104424	0.0790881	0.0945324	0.55	0.897272	0.60639	1.50366	27.3645	0.0956659
800	1200	0.104322	0.0800912	0.0899714	0.55	0.895512	0.614081	1.50959	26.0442	0.080113
900	1200	0.104747	0.0817795	0.0875598	0.55	0.898756	0.627025	1.52578	25.3461	0.0737635
1000	1200	0.105613	0.0823887	0.0926287	0.55	0.907331	0.631697	1.53903	26.8134	0.0921631
1100	1200	0.107206	0.0841445	0.0923916	0.55	0.922716	0.645159	1.56787	26.7448	0.126683
1200	1200	0.106532	0.0843891	0.0906297	0.55	0.915504	0.647035	1.56254	26.2348	0.0973057
1300	1200	0.107191	0.0857698	0.0871786	0.55	0.921398	0.65762	1.57902	25.2358	0.102113
1400	1200	0.106941	0.0839261	0.080271	0.55	0.920105	0.643484	1.56359	23.2362	0.119065
1500	1200	0.106161	0.0833132	0.0804293	0.55	0.91239	0.638785	1.55118	23.282	0.0985888
1600	1200	0.106408	0.0823902	0.080301	0.55	0.915622	0.631709	1.54733	23.2449	0.121464
1700	1200	0.106246	0.0809106	0.0857294	0.55	0.914975	0.620364	1.53534	24.8163	0.140223
1800	1200	0.105922	0.0818196	0.0907098	0.55	0.910956	0.627334	1.53829	26.258	0.110871
0	1300	0.100659	0.0713013	0.11025	0.55	0.863592	0.546687	1.41028	31.9142	0.0789289
100	1300	0.101875	0.0731117	0.110742	0.55	0.874936	0.560567	1.4355	32.0567	0.0927172
200	1300	0.102253	0.0740347	0.110678	0.55	0.878219	0.567644	1.44586	32.0382	0.092288
300	1300	0.102516	0.0754271	0.110182	0.55	0.879995	0.57832	1.45831	31.8945	0.0822667
400	1300	0.103145	0.076283	0.107737	0.55	0.885921	0.584882	1.4708	31.1868	0.0908672
500	1300	0.103986	0.0777214	0.101489	0.55	0.893669	0.595912	1.48958	29.3783	0.0995309
600	1300	0.104364	0.079463	0.0945957	0.55	0.896389	0.609265	1.50565	27.3828	0.0888342
700	1300	0.104614	0.0804551	0.0944771	0.55	0.898293	0.616871	1.51516	27.3485	0.084475
800	1300	0.105567	0.0818452	0.0930794	0.55	0.907239	0.627529	1.53477	26.9439	0.0976364
900	1300	0.10659	0.0829903	0.0904154	0.55	0.917099	0.636309	1.55341	26.1727	0.119388
1000	1300	0.106417	0.0836766	0.0920607	0.55	0.914803	0.641571	1.55637	26.649	0.102682
1100	1300	0.106349	0.0834688	0.0902965	0.55	0.914248	0.639978	1.55423	26.1383	0.103112
1200	1300	0.106426	0.0834801	0.0843578	0.55	0.915037	0.640065	1.5551	24.4193	0.105718
1300	1300	0.105907	0.0829535	0.0770566	0.55	0.909997	0.636027	1.54602	22.3057	0.0946784
1400	1300	0.106315	0.082729	0.08148	0.55	0.914417	0.634306	1.54872	23.5862	0.112444
1500	1300	0.105536	0.0819862	0.0843226	0.55	0.906818	0.628611	1.53543	24.4091	0.0947516
1600	1300	0.105958	0.0814137	0.0863979	0.55	0.911616	0.624221	1.53584	25.0098	0.118602
1700	1300	0.106032	0.0814734	0.0899943	0.55	0.912342	0.624679	1.53702	26.0509	0.120681
1800	1300	0.106235	0.0816112	0.0950802	0.55	0.914368	0.625735	1.5401	27.5231	0.127065
0	1400	0.10132	0.0734262	0.108974	0.55	0.868988	0.562979	1.43197	31.5449	0.0721061
100	1400	0.102478	0.0748167	0.10753	0.55	0.880015	0.57364	1.45366	31.1268	0.0889255
200	1400	0.102867	0.0758703	0.106475	0.55	0.88333	0.581718	1.46505	30.8214	0.0874239
300	1400	0.103519	0.0770178	0.100625	0.55	0.889304	0.590516	1.47982	29.1282	0.0933135
400	1400	0.103745	0.0784138	0.0959109	0.55	0.890681	0.60122	1.4919	27.7635	0.0826767
500	1400	0.104528	0.0789838	0.0983789	0.55	0.898421	0.605591	1.50401	28.478	0.100704
600	1400	0.105236	0.0812896	0.0971773	0.55	0.904185	0.623269	1.52745	28.1301	0.0937917
700	1400	0.105726	0.0823816	0.0946356	0.55	0.90852	0.631643	1.54016	27.3944	0.0959953
800	1400	0.105878	0.0825141	0.0924556	0.55	0.910004	0.632658	1.54266	26.7633	0.0994159
900	1400	0.106342	0.0830328	0.0903732	0.55	0.914479	0.636635	1.55111	26.1605	0.108977
1000	1400	0.10678	0.0834205	0.0851065	0.55	0.918783	0.639608	1.55839	24.636	0.12041
1100	1400	0.106362	0.0829437	0.0811579	0.55	0.914755	0.635952	1.55071	23.493	0.111058
1200	1400	0.105998	0.0822389	0.0806468	0.55	0.91145	0.630548	1.542	23.345	0.107565
1300	1400	0.105743	0.0817993	0.0829058	0.55	0.909101	0.627178	1.53628	23.9989	0.104456
1400	1400	0.105402	0.0804402	0.0854354	0.55	0.9065	0.616757	1.52326	24.7312	0.111674
1500	1400	0.106193	0.0813718	0.0888835	0.55	0.914099	0.6239	1.538	25.7293	0.129361
1600	1400	0.106153	0.0807137	0.0927	0.55	0.914143	0.618854	1.533	26.8341	0.139501
1700	1400	0.105418	0.0810829	0.0963977	0.55	0.906225	0.621685	1.52791	27.9045	0.10284
1800	1400	0.10586	0.0811622	0.0985209	0.55	0.910769	0.622293	1.53306	28.5191	0.118621
0	1500	0.102292	0.0748805	0.105613	0.55	0.878052	0.574129	1.45218	30.572	0.0823552
100	1500	0.103094	0.0760693	0.103384	0.55	0.885546	0.583244	1.46879	29.9267	0.092099
200	1500	0.103461	0.0779217	0.10098	0.55	0.888082	0.597447	1.48553	29.2309	0.0801725
300	1500	0.1039	0.0782812	0.0982474	0.55	0.892384	0.600203	1.49259	28.4399	0.0890678
400	1500	0.104622	0.0803666	0.0955499	0.55	0.898435	0.616192	1.51463	27.659	0.0857591
500	1500	0.105432	0.08066	0.0965747	0.55	0.906667	0.618442	1.52511	27.9557	0.109518
600	1500	0.10612	0.082149	0.0957421	0.55	0.912788	0.629859	1.54265	27.7147	0.113586
700	1500	0.106339	0.0832235	0.0934244	0.55	0.914309	0.638098	1.55241	27.0438	0.106124
800	1500	0.106079	0.0825779	0.0926714	0.55	0.912054	0.633148	1.5452	26.8258	0.105702
900	1500	0.105679	0.0829159	0.0861598	0.55	0.907655	0.635739	1.54339	24.9409	0.0878792
1000	1500	0.105953	0.0819427	0.0801715	0.55	0.911189	0.628277	1.53947	23.2074	0.110211
1100	1500	0.105995	0.0817622	0.0797715	0.55	0.911757	0.626893	1.53865	23.0916	0.114596
1200	1500	0.105641	0.0815937	0.0798599	0.55	0.908185	0.625601	1.53379	23.1172	0.103668
1300	1500	0.1047	0.0811944	0.0832673	0.55	0.898672	0.622539	1.52121	24.1036	0.0786147
1400	1500	0.104723	0.0802398	0.0885151	0.55	0.899574	0.615221	1.51479	25.6227	0.0904661
1500	1500	0.105318	0.0809004	0.0913609	0.55	0.905304	0.620285	1.52559	26.4464	0.101796
1600	1500	0.105591	0.0811282	0.0933032	0.55	0.907986	0.622032	1.53002	27.0087	0.108533
1700	1500	0.105558	0.0813354	0.0967078	0.55	0.907505	0.623621	1.53113	27.9942	0.104327
1800	1500	0.106074	0.0829676	0.105236	0.55	0.911734	0.636135	1.54787	30.4629	0.100184
0	1601	0.102513	0.0769058	0.104623	0.55	0.878955	0.589658	1.46861	30.2856	0.0659618
100	1601	0.103512	0.0780395	0.100913	0.55	0.88852	0.59835	1.48687	29.2115	0.0802494
200	1601	0.104072	0.0791611	0.100657	0.55	0.893558	0.60695	1.50051	29.1374	0.0835358
300	1601	0.103602	0.0801346	0.0962698	0.55	0.888016	0.614414	1.50243	27.8674	0.0614842
400	1601	0.103953	0.0806503	0.0915742	0.55	0.891297	0.618368	1.50966	26.5082	0.0649084
500	1601	0.104059	0.0813606	0.0904702	0.55	0.89191	0.623814	1.51572	26.1886	0.0610871
600	1601	0.105508	0.0820288	0.0903575	0.55	0.90649	0.628937	1.53543	26.156	0.0932665
700	1601	0.105606	0.0823956	0.0870091	0.55	0.907255	0.631749	1.539	25.1867	0.0918584
800	1601	0.105044	0.0823288	0.0809419	0.55	0.901453	0.631238	1.53269	23.4304	0.0760288
900	1601	0.104764	0.0807475	0.0765819	0.55	0.899651	0.619113	1.51876	22.1683	0.0855532
1000	1601	0.104916	0.0807244	0.0774884	0.55	0.901244	0.618936	1.52018	22.4307	0.0905518
1100	1601	0.104788	0.0807691	0.0813309	0.55	0.899879	0.619278	1.51916	23.543	0.0860082
1200	1601	0.10463	0.0802772	0.0843168	0.55	0.89858	0.615507	1.51409	24.4074	0.0870796
1300	1601	0.105343	0.0799381	0.0897546	0.55	0.906241	0.612908	1.51915	25.9815	0.117271
1400	1601	0.105379	0.081698	0.0932049	0.55	0.90538	0.626401	1.53178	26.9802	0.0932439
1500	1601	0.106292	0.0819461	0.0967243	0.55	0.914726	0.628303	1.54303	27.999	0.123871
1600	1601	0.105603	0.082685	0.10008	0.55	0.90702	0.633969	1.54099	28.9703	0.0882463
1700	1601	0.102853	0.080942	0.104661	0.55	0.87971	0.620604	1.50031	30.2964	0.0416987
1800	1601	0.104152	0.0821847	0.103638	0.55	0.892297	0.630132	1.52243	30.0004	0.0563531
0	1701	0.103545	0.0780003	0.0999817	0.55	0.888896	0.59805	1.48695	28.9419	0.0816858
100	1701	0.103357	0.0789951	0.100157	0.55	0.886256	0.605677	1.49193	28.9927	0.0661504
200	1701	0.103923	0.0803107	0.0995348	0.55	0.891219	0.615764	1.50698	28.8126	0.0673383
300	1701	0.104261	0.0803499	0.0931352	0.55	0.8947	0.616064	1.51076	26.9601	0.0756037
400	1701	0.105263	0.0811532	0.0925234	0.55	0.90456	0.622224	1.52678	26.783	0.096464
500	1701	0.105363	0.082016	0.0885609	0.55	0.904997	0.628839	1.53384	25.6359	0.088813
600	1701	0.105154	0.0816831	0.0853466	0.55	0.903054	0.626286	1.52934	24.7055	0.0863377
700	1701	0.10453	0.0810809	0.079574	0.55	0.896989	0.62167	1.51866	23.0345	0.0751796
800	1701	0.104534	0.0807832	0.0736988	0.55	0.897236	0.619387	1.51662	21.3338	0.0784565
900	1701	0.105249	0.0803418	0.0750244	0.55	0.90498	0.616002	1.52098	21.7175	0.107327
1000	1701	0.104674	0.08031	0.0797041	0.55	0.899013	0.615759	1.51477	23.0721	0.0880381
1100	1701	0.105106	0.0805897	0.0849883	0.55	0.903321	0.617904	1.52122	24.6018	0.0986547
1200	1701	0.105504	0.0809048	0.0894774	0.55	0.907235	0.620319	1.52755	25.9012	0.108554
1300	1701	0.106131	0.082062	0.095116	0.55	0.912959	0.629192	1.54215	27.5334	0.115341
1400	1701	0.106582	0.0815251	0.099332	0.55	0.918057	0.625075	1.54313	28.7538	0.144813
1500	1701	0.105501	0.0819475	0.106631	0.55	0.906477	0.628314	1.53479	30.8666	0.0940801
1600	1701	0.104593	0.0819432	0.108071	0.55	0.897041	0.628281	1.52532	31.2835	0.0682644
1700	1701	0.104987	0.0820837	0.100662	0.55	0.901039	0.629358	1.5304	29.139	0.0770566
1800	1701	0.106029	0.0814104	0.0925213	0.55	0.912363	0.624196	1.53656	26.7823	0.121618
0	1801	0.103879	0.0799257	0.0965084	0.55	0.891029	0.612812	1.50384	27.9365	0.0699748
100	1801	0.104457	0.0797848	0.0968357	0.55	0.897133	0.611731	1.50886	28.0312	0.0877593
200	1801	0.104562	0.0813602	0.0935668	0.55	0.897121	0.623811	1.52093	27.085	0.0731463
300	1801	0.105148	0.0810508	0.0918958	0.55	0.903432	0.621438	1.52487	26.6013	0.0939507
400	1801	0.104405	0.0808912	0.0869639	0.55	0.895818	0.620215	1.51603	25.1736	0.0738045
500	1801	0.105005	0.0812002	0.0820239	0.55	0.901839	0.622584	1.52442	23.7436	0.0875145
600	1801	0.104549	0.0797247	0.0733025	0.55	0.898123	0.611271	1.50939	21.219	0.0914086
700	1801	0.104789	0.0804417	0.0745062	0.55	0.90012	0.616768	1.51689	21.5675	0.0900392
800	1801	0.104528	0.080385	0.0777054	0.55	0.897451	0.616333	1.51378	22.4936	0.0827479
900	1801	0.104529	0.0801316	0.0800555	0.55	0.897639	0.614391	1.51203	23.1739	0.0857619
1000	1801	0.104621	0.0802257	0.0836629	0.55	0.898528	0.615113	1.51364	24.2181	0.0874426
1100	1801	0.105386	0.0805526	0.0886363	0.55	0.906259	0.617619	1.52388	25.6577	0.109362
1200	1801	0.105185	0.0816545	0.0984758	0.55	0.903391	0.626067	1.52946	28.506	0.0876129
1300	1801	0.105455	0.0810411	0.10636	0.55	0.906636	0.621364	1.528	30.7884	0.104761
1400	1801	0.10372	0.079597	0.107374	0.55	0.889607	0.610292	1.4999	31.0818	0.0692247
1500	1801	0.105495	0.0803542	0.108521	0.55	0.907528	0.616098	1.52363	31.4137	0.116716
1600	1801	0.106638	0.07926	0.0978468	0.55	0.920245	0.607708	1.52795	28.3239	0.200732
1700	1801	0.105602	0.0793699	0.0911224	0.55	0.909343	0.608551	1.51789	26.3774	0.138823
1800	1801	0.10572	0.0784966	0.0909275	0.55	0.911188	0.601855	1.51304	26.321	0.163273
0	1901	0.104401	0.0783301	0.0964593	0.55	0.897554	0.600578	1.49813	27.9223	0.105633
100	1901	0.104837	0.080243	0.0930243	0.55	0.900764	0.615245	1.51601	26.9279	0.0941595
200	1901	0.104609	0.0790816	0.0881524	0.55	0.899193	0.60634	1.50553	25.5177	0.102192
300	1901	0.104698	0.0789421	0.0844503	0.55	0.900222	0.60527	1.50549	24.446	0.10756
400	1901	0.104586	0.0793838	0.0796238	0.55	0.898747	0.608657	1.5074	23.0489	0.0971608
500	1901	0.104186	0.0792705	0.0750585	0.55	0.894667	0.607789	1.50246	21.7274	0.0856649
600	1901	0.104461	0.0784963	0.0746017	0.55	0.898062	0.601853	1.49991	21.5951	0.105374
700	1901	0.1046	0.078186	0.075006	0.55	0.899722	0.599473	1.4992	21.7122	0.11563
800	1901	0.104817	0.078429	0.0787272	0.55	0.901816	0.601336	1.50315	22.7893	0.120555
900	1901	0.104621	0.0786793	0.0828958	0.55	0.899602	0.603255	1.50286	23.996	0.10864
1000	1901	0.105177	0.0793324	0.0884637	0.55	0.90494	0.608263	1.5132	25.6078	0.120427
1100	1901	0.105375	0.0793323	0.0972718	0.55	0.907004	0.608262	1.51527	28.1575	0.129013
1200	1901	0.104966	0.0804918	0.105655	0.55	0.901927	0.617153	1.51908	30.5843	0.0951794
1300	1901	0.104187	0.0797147	0.107473	0.55	0.894374	0.611194	1.50557	31.1106	0.0805019
1400	1901	0.104771	0.0791482	0.100388	0.55	0.900832	0.606851	1.50768	29.0596	0.107176
1500	1901	0.105598	0.0796174	0.0948581	0.55	0.909127	0.610448	1.51958	27.4588	0.133955
1600	1901	0.106427	0.0795754	0.0914477	0.55	0.917811	0.610126	1.52794	26.4716	0.178969
1700	1901	0.10546	0.0785816	0.0951142	0.55	0.908409	0.602506	1.51092	27.5329	0.147513
1800	1901	0.102912	0.0765778	0.0919013	0.55	0.883312	0.587143	1.47046	26.6029	0.0800294
0	2001	0.104442	0.0781098	0.0898925	0.55	0.898133	0.598889	1.49702	26.0214	0.110584
100	2001	0.103971	0.0785693	0.0862468	0.55	0.892926	0.602412	1.49534	24.9661	0.0876771
200	2001	0.104464	0.0785915	0.0835624	0.55	0.898029	0.602582	1.50061	24.189	0.104079
300	2001	0.104355	0.078299	0.0790319	0.55	0.897094	0.60034	1.49743	22.8776	0.104383
400	2001	0.104375	0.0779673	0.0751596	0.55	0.897534	0.597797	1.49533	21.7566	0.110219
500	2001	0.104276	0.078255	0.0752744	0.55	0.896307	0.600003	1.49631	21.7899	0.102163
600	2001	0.104136	0.0780385	0.0773122	0.55	0.895003	0.598343	1.49335	22.3797	0.100282
700	2001	0.10461	0.078056	0.0792706	0.55	0.89992	0.598477	1.4984	22.9466	0.118217
800	2001	0.105112	0.0793907	0.0835525	0.55	0.904213	0.60871	1.51292	24.1861	0.116737
900	2001	0.105632	0.0798636	0.092945	0.55	0.909308	0.612336	1.52164	26.905	0.130997
1000	2001	0.105589	0.0799489	0.103889	0.55	0.908799	0.61299	1.52179	30.0729	0.127547
1100	2001	0.104813	0.0806512	0.105661	0.55	0.900228	0.618375	1.5186	30.5858	0.0882178
1200	2001	0.10619	0.0801212	0.107757	0.55	0.914946	0.614311	1.52926	31.1928	0.153174
1300	2001	0.106148	0.0802643	0.100748	0.55	0.914406	0.615409	1.52981	29.1639	0.148058
1400	2001	0.10557	0.079864	0.0914693	0.55	0.908658	0.612339	1.521	26.4778	0.128195
1500	2001	0.105712	0.0787519	0.0920159	0.55	0.910923	0.603812	1.51473	26.6361	0.157115
1600	2001	0.105371	0.077857	0.0976942	0.55	0.907988	0.596951	1.50494	28.2798	0.158398
1700	2001	0.104981	0.0778106	0.101254	0.55	0.903954	0.596595	1.50055	29.3103	0.139325
1800	2001	0.104808	0.0769943	0.0961427	0.55	0.902723	0.590336	1.49306	27.8306	0.147411
0	2101	0.1042	0.0785108	0.0868099	0.55	0.895344	0.601964	1.49731	25.1291	0.0959052
100	2101	0.10432	0.0786319	0.0821337	0.55	0.896501	0.602892	1.49939	23.7754	0.0983413
200	2101	0.104187	0.0780523	0.0780711	0.55	0.89552	0.598449	1.49397	22.5994	0.101896
300	2101	0.104319	0.0775959	0.0768808	0.55	0.897214	0.594949	1.49216	22.2549	0.113985
400	2101	0.104326	0.0782753	0.0755303	0.55	0.89681	0.600158	1.49697	21.8639	0.103672
500	2101	0.104681	0.0781233	0.078445	0.55	0.900613	0.598992	1.49961	22.7077	0.120041
600	2101	0.104255	0.0789732	0.0785837	0.55	0.895595	0.605509	1.5011	22.7478	0.0915807
700	2101	0.105392	0.0790534	0.08608	0.55	0.907374	0.606124	1.5135	24.9178	0.134911
800	2101	0.105375	0.079444	0.0992313	0.55	0.906921	0.609119	1.51604	28.7247	0.127006
900	2101	0.105599	0.0808604	0.105252	0.55	0.908264	0.619979	1.52824	30.4676	0.112918
1000	2101	0.10498	0.0805849	0.106312	0.55	0.902005	0.617867	1.51987	30.7743	0.0944149
1100	2101	0.105517	0.0798595	0.102183	0.55	0.908108	0.612304	1.52041	29.5791	0.125941
1200	2101	0.105644	0.0799741	0.0963991	0.55	0.909358	0.613183	1.52254	27.9049	0.129561
1300	2101	0.105439	0.0789444	0.0892331	0.55	0.907937	0.605288	1.51322	25.8305	0.139207
1400	2101	0.105202	0.0787456	0.0925272	0.55	0.90561	0.603764	1.50937	26.7841	0.131871
1500	2101	0.105195	0.0780092	0.0951836	0.55	0.90605	0.598118	1.50417	27.553	0.14591
1600	2101	0.105061	0.078895	0.0968287	0.55	0.904029	0.604909	1.50894	28.0292	0.122922
1700	2101	0.104777	0.0788709	0.0931875	0.55	0.901089	0.604724	1.50581	26.9752	0.111684
1800	2101	0.104946	0.0785129	0.090506	0.55	0.903099	0.60198	1.50508	26.199	0.124616
0	2201	0.104936	0.080617	0.0775436	0.55	0.901525	0.618112	1.51964	22.4467	0.0925518
100	2201	0.104473	0.0799117	0.0737593	0.55	0.897209	0.612704	1.50991	21.3513	0.0866972
200	2201	0.103753	0.0790432	0.0731229	0.55	0.890333	0.606046	1.49638	21.1671	0.0757919
300	2201	0.103494	0.0797225	0.0784989	0.55	0.887182	0.611254	1.49844	22.7233	0.0626823
400	2201	0.103953	0.0803329	0.0782501	0.55	0.891514	0.615934	1.50745	22.6512	0.0678573
500	2201	0.10462	0.0809646	0.0783978	0.55	0.898001	0.620778	1.51878	22.694	0.0788764
600	2201	0.105139	0.0811145	0.0855174	0.55	0.903297	0.621927	1.52522	24.7549	0.0928472
700	2201	0.105069	0.0814059	0.0991611	0.55	0.902367	0.624162	1.52653	28.7044	0.0870361
800	2201	0.105981	0.0827005	0.108052	0.55	0.910944	0.634087	1.54503	31.2782	0.100495
900	2201	0.104949	0.082231	0.10803	0.55	0.900539	0.630488	1.53103	31.2716	0.0745069
1000	2201	0.104976	0.0821267	0.101958	0.55	0.900887	0.629688	1.53057	29.5142	0.0762886
1100	2201	0.10575	0.0816154	0.0952147	0.55	0.90931	0.625767	1.53508	27.562	0.107378
1200	2201	0.105164	0.0803269	0.0902299	0.55	0.904108	0.615888	1.52	26.119	0.104406
1300	2201	0.105233	0.0790762	0.0941983	0.55	0.905701	0.606299	1.512	27.2678	0.127263
1400	2201	0.104649	0.0791504	0.095848	0.55	0.899561	0.606868	1.50643	27.7453	0.102643
1500	2201	0.104603	0.0788692	0.0970063	0.55	0.899286	0.604712	1.504	28.0806	0.105107
1600	2201	0.104351	0.0789397	0.0976351	0.55	0.89661	0.605252	1.50186	28.2627	0.0951817
1700	2201	0.104002	0.0780686	0.0969866	0.55	0.893587	0.598573	1.49216	28.0749	0.0952052
1800	2201	0.103715	0.0765139	0.0966607	0.55	0.891685	0.586653	1.47834	27.9806	0.107677
0	2301	0.103621	0.0792101	0.0789816	0.55	0.888844	0.607325	1.49617	22.863	0.0705675
100	2301	0.103725	0.0797835	0.0787879	0.55	0.889533	0.611722	1.50125	22.8069	0.0675496
200	2301	0.10418	0.07975	0.0796084	0.55	0.894276	0.611465	1.50574	23.0444	0.0798998
300	2301	0.104612	0.0801666	0.0783799	0.55	0.898478	0.614659	1.51314	22.6888	0.0878927
400	2301	0.10467	0.0808944	0.0826164	0.55	0.898567	0.620239	1.51881	23.9152	0.0810693
500	2301	0.104772	0.0822399	0.0921051	0.55	0.898691	0.630556	1.52925	26.6619	0.0698664
600	2301	0.105592	0.0824745	0.103318	0.55	0.90706	0.632355	1.53941	29.9077	0.0904588
700	2301	0.105593	0.0827168	0.107687	0.55	0.906898	0.634212	1.54111	31.1723	0.0875771
800	2301	0.104902	0.0822743	0.110627	0.55	0.90002	0.63082	1.53084	32.0235	0.0728417
900	2301	0.105631	0.0820437	0.105242	0.55	0.907769	0.629051	1.53682	30.4647	0.0972017
1000	2301	0.105554	0.0811192	0.0989747	0.55	0.907612	0.621963	1.52958	28.6504	0.107292
1100	2301	0.105571	0.0801453	0.095784	0.55	0.908469	0.614496	1.52296	27.7268	0.123347
1200	2301	0.10548	0.0796003	0.0934121	0.55	0.907904	0.610317	1.51822	27.0402	0.128879
1300	2301	0.104611	0.0789175	0.0992126	0.55	0.899331	0.605082	1.50441	28.7193	0.104669
1400	2301	0.104216	0.0783451	0.100206	0.55	0.895623	0.600693	1.49632	29.0069	0.0987475
1500	2301	0.104961	0.0786916	0.101716	0.55	0.90313	0.60335	1.50648	29.444	0.122155
1600	2301	0.104675	0.0778104	0.102682	0.55	0.900764	0.596593	1.49736	29.7237	0.125224
1700	2301	0.104395	0.0773681	0.101057	0.55	0.898162	0.593202	1.49136	29.2533	0.120955
1800	2301	0.103739	0.0762905	0.0967082	0.55	0.892084	0.58494	1.47702	27.9943	0.112182
0	2401	0.103418	0.0791138	0.0792177	0.55	0.886809	0.606587	1.4934	22.9313	0.0664934
100	2401	0.103566	0.0791373	0.079012	0.55	0.888327	0.606767	1.49509	22.8718	0.0699116
200	2401	0.104252	0.0799715	0.0808204	0.55	0.894865	0.613163	1.50803	23.3953	0.0794523
300	2401	0.10429	0.08066	0.0842804	0.55	0.894787	0.618442	1.51323	24.3968	0.0731568
400	2401	0.105426	0.082566	0.0941271	0.55	0.905262	0.633056	1.53832	27.2472	0.084268
500	2401	0.105671	0.0825027	0.103864	0.55	0.907862	0.632571	1.54043	30.0659	0.0926415
600	2401	0.105779	0.0826867	0.108957	0.55	0.908851	0.633981	1.54283	31.5402	0.0938365
700	2401	0.104813	0.0813321	0.105168	0.55	0.899746	0.623595	1.52334	30.4431	0.0802823
800	2401	0.105351	0.0809592	0.0998826	0.55	0.905609	0.620736	1.52634	28.9132	0.102158
900	2401	0.104353	0.080131	0.0953143	0.55	0.895804	0.614386	1.51019	27.5909	0.0805467
1000	2401	0.104419	0.0795361	0.100019	0.55	0.896904	0.609825	1.50673	28.9528	0.0896383
1100	2401	0.105211	0.0804976	0.100815	0.55	0.904478	0.617197	1.52168	29.183	0.103665
1200	2401	0.10441	0.0785506	0.100177	0.55	0.897491	0.602269	1.49976	28.9985	0.10269
1300	2401	0.104759	0.0786441	0.101236	0.55	0.901065	0.602986	1.50405	29.3049	0.114608
1400	2401	0.104061	0.0780252	0.103724	0.55	0.894231	0.598241	1.49247	30.0251	0.0978301
1500	2401	0.104455	0.0775453	0.105918	0.55	0.898661	0.594561	1.49322	30.6604	0.120423
1600	2401	0.103698	0.07656	0.100695	0.55	0.89147	0.587006	1.47848	29.1483	0.10629
1700	2401	0.103801	0.0757016	0.0956481	0.55	0.893139	0.580425	1.47356	27.6875	0.125022
1800	2401	0.103033	0.075124	0.100773	0.55	0.885562	0.575996	1.46156	29.1709	0.103685
0	2501	0.104541	0.0790049	0.0805329	0.55	0.898541	0.605752	1.50429	23.312	0.100864
100	2501	0.104375	0.0800414	0.083239	0.55	0.896103	0.613699	1.5098	24.0954	0.082228
200	2501	0.105285	0.080641	0.086268	0.55	0.905146	0.618296	1.52344	24.9722	0.104297
300	2501	0.104818	0.0815333	0.0944121	0.55	0.899666	0.625138	1.5248	27.3297	0.0782524
400	2501	0.105538	0.0820245	0.101496	0.55	0.906807	0.628905	1.53571	29.3803	0.0943134
500	2501	0.106253	0.0825176	0.103427	0.55	0.913912	0.632685	1.5466	29.9392	0.113185
600	2501	0.105161	0.0811868	0.106123	0.55	0.903467	0.622481	1.52595	30.7197	0.0926178
700	2501	0.105071	0.0803403	0.10021	0.55	0.90313	0.615991	1.51912	29.008	0.100866
800	2501	0.105269	0.0796275	0.0972391	0.55	0.905689	0.610526	1.51622	28.148	0.119329
900	2501	0.104562	0.0792914	0.0984964	0.55	0.898565	0.607949	1.50651	28.512	0.0976105
1000	2501	0.104555	0.0784403	0.0999117	0.55	0.899081	0.601423	1.5005	28.9217	0.109796
1100	2501	0.104536	0.0777567	0.0975388	0.55	0.899361	0.596182	1.49554	28.2348	0.120221
1200	2501	0.104437	0.0778266	0.0982374	0.55	0.898283	0.596718	1.495	28.437	0.114961
1300	2501	0.103985	0.0764826	0.102899	0.55	0.894515	0.586413	1.48093	29.7865	0.11902
1400	2501	0.103959	0.0767973	0.104581	0.55	0.894019	0.588826	1.48284	30.2734	0.11263
1500	2501	0.103367	0.0755332	0.103281	0.55	0.888741	0.579134	1.46787	29.897	0.109886
1600	2501	0.104056	0.0748194	0.101097	0.55	0.896404	0.573661	1.47007	29.2649	0.15571
1700	2501	0.104098	0.0752497	0.105478	0.55	0.896534	0.57696	1.47349	30.533	0.148258
1800	2501	0.103614	0.074132	0.102445	0.55	0.892273	0.56839	1.46066	29.655	0.147705
0	2601	0.104153	0.0797287	0.0817995	0.55	0.894005	0.611302	1.50531	23.6787	0.0793574
100	2601	0.104757	0.0807593	0.087646	0.55	0.899568	0.619204	1.51877	25.3711	0.0851959
200	2601	0.1052	0.0820403	0.091864	0.55	0.903284	0.629025	1.53231	26.5921	0.0835804
300	2601	0.105708	0.082688	0.0985862	0.55	0.908118	0.633992	1.54211	28.538	0.0915402
400	2601	0.106145	0.0820292	0.10237	0.55	0.913138	0.62894	1.54208	29.6332	0.11645
500	2601	0.105451	0.0803627	0.10149	0.55	0.907068	0.616163	1.52323	29.3785	0.114828
600	2601	0.105045	0.080673	0.0984247	0.55	0.902625	0.618542	1.52117	28.4912	0.0954476
700	2601	0.104701	0.0797841	0.096099	0.55	0.899664	0.611727	1.51139	27.818	0.0956605
800	2601	0.104685	0.0783584	0.0976371	0.55	0.900493	0.600795	1.50129	28.2632	0.116274
900	2601	0.104497	0.0775965	0.0969447	0.55	0.899064	0.594953	1.49402	28.0628	0.121322
1000	2601	0.104581	0.0781789	0.0975169	0.55	0.899529	0.599419	1.49895	28.2284	0.114978
1100	2601	0.104384	0.0777676	0.0992836	0.55	0.897764	0.596265	1.49403	28.7399	0.113763
1200	2601	0.103657	0.0764615	0.103341	0.55	0.891114	0.586251	1.47737	29.9144	0.106278
1300	2601	0.103578	0.0756587	0.105386	0.55	0.890851	0.580096	1.47095	30.5062	0.116278
1400	2601	0.103408	0.0746218	0.101164	0.55	0.889794	0.572146	1.46194	29.284	0.127667
1500	2601	0.103147	0.0747396	0.105316	0.55	0.887006	0.573049	1.46005	30.4861	0.11436
1600	2601	0.103868	0.0740838	0.108386	0.55	0.894951	0.568021	1.46297	31.3746	0.162619
1700	2601	0.104132	0.0751912	0.104111	0.55	0.896935	0.576511	1.47345	30.1372	0.151356
1800	2601	0.103703	0.0746203	0.102011	0.55	0.892864	0.572134	1.465	29.5294	0.141704
0	2701	0.104881	0.0810777	0.0900641	0.55	0.900637	0.621645	1.52228	26.0711	0.0851935
100	2701	0.105519	0.0814208	0.0934657	0.55	0.907036	0.624276	1.53131	27.0557	0.101714
200	2701	0.104925	0.0809206	0.0972289	0.55	0.901207	0.62044	1.52165	28.1451	0.0884304
300	2701	0.10573	0.0818081	0.10051	0.55	0.90896	0.627245	1.53621	29.0949	0.103865
400	2701	0.10588	0.0811024	0.100595	0.55	0.911021	0.621834	1.53285	29.1193	0.120427
500	2701	0.105731	0.0797484	0.0999186	0.55	0.910414	0.611453	1.52187	28.9237	0.137697
600	2701	0.105174	0.079523	0.0982057	0.55	0.904767	0.609725	1.51449	28.4278	0.117113
700	2701	0.104381	0.0777349	0.0983957	0.55	0.897761	0.596014	1.49378	28.4828	0.114196
800	2701	0.104518	0.078449	0.0967877	0.55	0.898692	0.601489	1.50018	28.0173	0.108251
900	2701	0.10457	0.0777591	0.0959755	0.55	0.899707	0.5962	1.49591	27.7822	0.121595
1000	2701	0.1039	0.0771674	0.100944	0.55	0.893151	0.591664	1.48481	29.2204	0.104547
1100	2701	0.104015	0.0762005	0.107242	0.55	0.895022	0.58425	1.47927	31.0434	0.125329
1200	2701	0.103434	0.0758161	0.106459	0.55	0.889247	0.581303	1.47055	30.817	0.10795
1300	2701	0.103387	0.0748999	0.10272	0.55	0.889384	0.574278	1.46366	29.7346	0.121574
1400	2701	0.10339	0.0746548	0.100108	0.55	0.889583	0.572399	1.46198	28.9785	0.126229
1500	2701	0.103397	0.0743164	0.103954	0.55	0.889888	0.569804	1.45969	30.0917	0.1331
1600	2701	0.10322	0.074441	0.102703	0.55	0.887968	0.57076	1.45873	29.7297	0.122723
1700	2701	0.103421	0.0751407	0.104652	0.55	0.88957	0.576124	1.46569	30.2938	0.118718
1800	2701	0.103663	0.074703	0.109927	0.55	0.892389	0.572769	1.46516	31.8207	0.138009
0	2801	0.105428	0.0817312	0.0975277	0.55	0.905873	0.626656	1.53253	28.2316	0.0944518
100	2801	0.105006	0.0830814	0.102666	0.55	0.900536	0.637008	1.53754	29.7188	0.0677387
200	2801	0.105071	0.0828454	0.106261	0.55	0.901382	0.635198	1.53658	30.7596	0.071587
300	2801	0.104228	0.0826145	0.104116	0.55	0.892784	0.633428	1.52621	30.1386	0.0545965
400	2801	0.104845	0.080979	0.102373	0.55	0.90033	0.620888	1.52122	29.6341	0.0852621
500	2801	0.104393	0.0806855	0.101527	0.55	0.895841	0.618638	1.51448	29.3891	0.0756351
600	2801	0.10438	0.0798436	0.0988161	0.55	0.896282	0.612183	1.50846	28.6045	0.0846603
700	2801	0.103495	0.0786525	0.096453	0.55	0.887931	0.60305	1.49098	27.9205	0.0730536
800	2801	0.103443	0.0786584	0.0988084	0.55	0.887379	0.603096	1.49047	28.6023	0.0716127
900	2801	0.103259	0.0781326	0.105138	0.55	0.885842	0.599064	1.48491	30.4345	0.0723032
1000	2801	0.103315	0.0774913	0.105992	0.55	0.886861	0.594147	1.48101	30.6818	0.0809589
1100	2801	0.10331	0.0765156	0.101273	0.55	0.887475	0.586666	1.47414	29.3158	0.093172
1200	2801	0.102743	0.0757796	0.0949333	0.55	0.8821	0.581023	1.46312	27.4806	0.0847127
1300	2801	0.102438	0.0756334	0.0958088	0.55	0.879046	0.579902	1.45895	27.734	0.0775395
1400	2801	0.102767	0.0754192	0.102088	0.55	0.882597	0.57826	1.46086	29.5517	0.0901689
1500	2801	0.102527	0.0753089	0.105324	0.55	0.880189	0.577414	1.4576	30.4884	0.0840699
1600	2801	0.103412	0.0765617	0.110757	0.55	0.888499	0.58702	1.47552	32.0612	0.0959709
1700	2801	0.103785	0.0763235	0.111246	0.55	0.892542	0.585193	1.47774	32.2025	0.113488
1800	2801	0.103335	0.0763758	0.104933	0.55	0.887838	0.585594	1.47343	30.3753	0.0959814
0	2901	0.105285	0.0833416	0.104702	0.55	0.903257	0.639003	1.54226	30.3082	0.0722297
100	2901	0.104857	0.0819395	0.104403	0.55	0.899786	0.628252	1.52804	30.2219	0.0750405
200	2901	0.104423	0.0819173	0.104282	0.55	0.89529	0.628083	1.52337	30.1869	0.0644523
300	2901	0.104048	0.0805581	0.100936	0.55	0.892348	0.617661	1.51001	29.2183	0.0680419
400	2901	0.10374	0.0796961	0.100438	0.55	0.889748	0.611051	1.5008	29.074	0.0687587
500	2901	0.104468	0.0795409	0.0991234	0.55	0.897411	0.609862	1.50727	28.6935	0.0911504
600	2901	0.10383	0.0799419	0.0979191	0.55	0.890515	0.612936	1.50345	28.3449	0.0686075
700	2901	0.103461	0.0785246	0.10373	0.55	0.887666	0.60207	1.48974	30.0268	0.0735008
800	2901	0.103251	0.0781015	0.108444	0.55	0.885774	0.598826	1.4846	31.3914	0.0724035
900	2901	0.103042	0.0772895	0.106807	0.55	0.884166	0.5926	1.47677	30.9178	0.0755492
1000	2901	0.102934	0.0756758	0.101999	0.55	0.884153	0.580227	1.46438	29.5259	0.0921666
1100	2901	0.1025	0.075796	0.0976115	0.55	0.879581	0.581148	1.46073	28.2558	0.077413
1200	2901	0.102786	0.0756998	0.0979204	0.55	0.882603	0.580411	1.46301	28.3452	0.0870745
1300	2901	0.10287	0.0759137	0.0994478	0.55	0.883332	0.582051	1.46538	28.7874	0.0869596
1400	2901	0.102754	0.0763091	0.106209	0.55	0.881859	0.585083	1.46694	30.7444	0.0786445
1500	2901	0.102558	0.0760671	0.109342	0.55	0.879989	0.583227	1.46322	31.6516	0.0759127
1600	2901	0.102985	0.075839	0.109813	0.55	0.884575	0.581478	1.46605	31.7878	0.0916413
1700	2901	0.103491	0.0757224	0.104365	0.55	0.889905	0.580585	1.47049	30.2109	0.1117
1800	2901	0.103436	0.0798206	0.0991938	0.55	0.886511	0.612006	1.49852	28.7139	0.0605224
0	3001	0.104456	0.0824545	0.107151	0.55	0.895262	0.632201	1.52746	31.0174	0.06059
100	3001	0.103991	0.0810188	0.101994	0.55	0.891437	0.621193	1.51263	29.5246	0.0625034
200	3001	0.104255	0.0806631	0.100728	0.55	0.894417	0.618466	1.51288	29.1579	0.0722023
300	3001	0.104062	0.0796049	0.101592	0.55	0.893146	0.610352	1.5035	29.408	0.0781717
400	3001	0.103453	0.0795934	0.0998582	0.55	0.88684	0.610264	1.4971	28.9062	0.0628881
500	3001	0.104118	0.0791123	0.0975367	0.55	0.894075	0.606575	1.50065	28.2342	0.0855219
600	3001	0.103575	0.0793739	0.102971	0.55	0.888261	0.608582	1.49684	29.8073	0.0678234
700	3001	0.103429	0.0783957	0.1115	0.55	0.887419	0.601081	1.4885	32.2761	0.074007
800	3001	0.103115	0.0769009	0.107909	0.55	0.885187	0.58962	1.47481	31.2366	0.0820964
900	3001	0.102713	0.0765007	0.100501	0.55	0.881299	0.586552	1.46785	29.0924	0.0753069
1000	3001	0.102684	0.0762162	0.096028	0.55	0.881194	0.584371	1.46556	27.7975	0.077727
1100	3001	0.10283	0.075537	0.0953859	0.55	0.883173	0.579163	1.46234	27.6116	0.090645
1200	3001	0.102921	0.0758503	0.0992584	0.55	0.883898	0.581565	1.46546	28.7326	0.0893878
1300	3001	0.102444	0.0760466	0.108957	0.55	0.878821	0.58307	1.46189	31.5401	0.0730489
1400	3001	0.103166	0.0759698	0.111237	0.55	0.886364	0.582481	1.46884	32.2	0.0959164
1500	3001	0.102999	0.0761278	0.110889	0.55	0.884523	0.583693	1.46822	32.0994	0.0882497
1600	3001	0.103222	0.0765806	0.102183	0.55	0.886517	0.587164	1.47368	29.5793	0.0894195
1700	3001	0.103788	0.0771317	0.0955146	0.55	0.89201	0.59139	1.4834	27.6488	0.100986
1800	3001	0.102849	0.0857327	0.096243	0.55	0.876399	0.657336	1.53373	27.8597	0.0214406
0	3101	0.104248	0.0812826	0.10106	0.55	0.893915	0.623216	1.51713	29.2541	0.0660767
100	3101	0.103968	0.0808682	0.0974169	0.55	0.891301	0.620038	1.51134	28.1995	0.0632995
200	3101	0.104179	0.0793326	0.0986156	0.55	0.894559	0.608264	1.50282	28.5465	0.084727
300	3101	0.105086	0.078081	0.0946104	0.55	0.904859	0.598669	1.50353	27.3871	0.139063
400	3101	0.10357	0.0775766	0.0979019	0.55	0.889443	0.594801	1.48424	28.3399	0.0876101
500	3101	0.103762	0.0770321	0.106516	0.55	0.891817	0.590626	1.48244	30.8334	0.101543
600	3101	0.103603	0.0759617	0.106036	0.55	0.890903	0.582419	1.47332	30.6945	0.112201
700	3101	0.104117	0.075187	0.104534	0.55	0.896775	0.576479	1.47325	30.2597	0.150626
800	3101	0.103381	0.0755625	0.0982352	0.55	0.888868	0.579358	1.46823	28.4364	0.109966
900	3101	0.103862	0.0747161	0.0944334	0.55	0.894456	0.572869	1.46733	27.3358	0.14774
1000	3101	0.103401	0.0739435	0.0929125	0.55	0.890195	0.566945	1.45714	26.8956	0.140998
1100	3101	0.103365	0.0746636	0.0983643	0.55	0.889319	0.572466	1.46178	28.4737	0.124957
1200	3101	0.103507	0.0743541	0.112031	0.55	0.891006	0.570093	1.4611	32.4298	0.137595
1300	3101	0.10372	0.0748327	0.112634	0.55	0.892896	0.573763	1.46666	32.6044	0.138133
1400	3101	0.103677	0.0751585	0.109049	0.55	0.892217	0.576261	1.46848	31.5668	0.129617
1500	3101	0.104331	0.0743068	0.097733	0.55	0.899618	0.569731	1.46935	28.291	0.18478
1600	3101	0.104904	0.0761101	0.092422	0.55	0.904336	0.583557	1.48789	26.7536	0.173034
1700	3101	0.104422	0.0780094	0.0967138	0.55	0.897996	0.59812	1.49612	27.9959	0.111395
1800	3101	0.103808	0.0880657	0.105369	0.55	0.884681	0.675224	1.5599	30.5014	0.0225158
0	3201	0.104419	0.0789893	0.0959143	0.55	0.897289	0.605633	1.50292	27.7645	0.0968423
100	3201	0.104127	0.0778333	0.0942257	0.55	0.895049	0.596769	1.49182	27.2757	0.102934
200	3201	0.104269	0.077763	0.0928211	0.55	0.89658	0.59623	1.49281	26.8691	0.109349
300	3201	0.104049	0.0772756	0.096944	0.55	0.89463	0.592493	1.48712	28.0626	0.108519
400	3201	0.103986	0.076487	0.101616	0.55	0.894523	0.586446	1.48097	29.4151	0.118986
500	3201	0.103946	0.0762771	0.104189	0.55	0.894251	0.584837	1.47909	30.1599	0.120957
600	3201	0.103494	0.0751927	0.100122	0.55	0.890299	0.576523	1.46682	28.9824	0.120918
700	3201	0.102848	0.0751639	0.0987653	0.55	0.883615	0.576302	1.45992	28.5898	0.0964559
800	3201	0.103174	0.0745179	0.0958175	0.55	0.887441	0.571349	1.45879	27.7365	0.11937
900	3201	0.10345	0.0743621	0.0967576	0.55	0.890409	0.570155	1.46056	28.0086	0.134699
1000	3201	0.102999	0.0743081	0.107787	0.55	0.885765	0.569741	1.45551	31.2013	0.115736
1100	3201	0.103459	0.0742201	0.112891	0.55	0.890602	0.569066	1.45967	32.6788	0.138039
1200	3201	0.104015	0.0753309	0.114764	0.55	0.895615	0.577582	1.4732	33.221	0.142311
1300	3201	0.104482	0.0752163	0.107056	0.55	0.900562	0.576704	1.47727	30.9898	0.170316
1400	3201	0.104498	0.0750879	0.0900374	0.55	0.900819	0.57572	1.47654	26.0633	0.174518
1500	3201	0.104257	0.075597	0.0863273	0.55	0.897948	0.579623	1.47757	24.9894	0.148934
1600	3201	0.104764	0.0762658	0.0954661	0.55	0.902768	0.584751	1.48752	27.6348	0.161202
1700	3201	0.104785	0.0825567	0.110913	0.55	0.898604	0.632985	1.53159	32.1062	0.0672207
1800	3201	0.103499	0.0924845	0.12359	0.55	0.878448	0.709104	1.58755	35.7758	0.0113062
0	3301	0.104334	0.0779786	0.0897003	0.55	0.897101	0.597883	1.49498	25.9658	0.108468
100	3301	0.104003	0.0777958	0.0878675	0.55	0.893793	0.596482	1.49027	25.4352	0.0990652
200	3301	0.103707	0.0771285	0.0973023	0.55	0.891178	0.591365	1.48254	28.1663	0.0981861
300	3301	0.103996	0.0767705	0.103002	0.55	0.894427	0.588621	1.48305	29.8163	0.114575
400	3301	0.103896	0.0762834	0.103485	0.55	0.893723	0.584886	1.47861	29.956	0.118721
500	3301	0.103563	0.0753265	0.102836	0.55	0.890916	0.577549	1.46847	29.7683	0.121447
600	3301	0.103165	0.075281	0.100145	0.55	0.886821	0.5772	1.46402	28.9892	0.10617
700	3301	0.10332	0.0738397	0.0989431	0.55	0.889417	0.566149	1.45557	28.6413	0.139147
800	3301	0.103668	0.0749533	0.100503	0.55	0.892272	0.574687	1.46696	29.0927	0.133226
900	3301	0.103355	0.0751018	0.107736	0.55	0.888913	0.575826	1.46474	31.1865	0.116646
1000	3301	0.102838	0.0748094	0.107159	0.55	0.883748	0.573584	1.45733	31.0196	0.10133
1100	3301	0.101681	0.0730341	0.104454	0.55	0.872978	0.559973	1.43295	30.2365	0.0874318
1200	3301	0.103339	0.0751143	0.0985534	0.55	0.888742	0.575922	1.46466	28.5285	0.115787
1300	3301	0.10402	0.0751935	0.0890465	0.55	0.895764	0.576529	1.47229	25.7765	0.145482
1400	3301	0.104172	0.0756185	0.0859112	0.55	0.897048	0.579788	1.47684	24.8689	0.144124
1500	3301	0.104675	0.0765644	0.0973566	0.55	0.901636	0.58704	1.48868	28.182	0.149726
1600	3301	0.105079	0.0782013	0.111698	0.55	0.904704	0.599591	1.50429	32.3335	0.136398
1700	3301	0.104615	0.0883792	0.125225	0.55	0.892796	0.677627	1.57042	36.2491	0.0291538
1800	3301	0.104549	0.0890234	0.121234	0.55	0.891663	0.682566	1.57423	35.094	0.0261728
0	3401	0.103776	0.0770428	0.0905285	0.55	0.891953	0.590709	1.48266	26.2055	0.101883
100	3401	0.10385	0.0766451	0.0964071	0.55	0.892992	0.587659	1.48065	27.9072	0.110799
200	3401	0.103752	0.07638	0.102174	0.55	0.892161	0.585626	1.47779	29.5765	0.111252
300	3401	0.103672	0.0754463	0.10276	0.55	0.891976	0.578467	1.47044	29.7463	0.124043
400	3401	0.103097	0.075128	0.103623	0.55	0.886223	0.576027	1.46225	29.996	0.10602
500	3401	0.10493	0.074205	0.10297	0.55	0.905936	0.56895	1.47489	29.8071	0.230426
600	3401	0.104414	0.0739969	0.104249	0.55	0.900699	0.567355	1.46805	30.1772	0.199085
700	3401	0.104271	0.073314	0.10606	0.55	0.899676	0.562118	1.46179	30.7013	0.209756
800	3401	0.104802	0.0735221	0.106312	0.55	0.905079	0.563714	1.46879	30.7745	0.244009
900	3401	0.104706	0.0733608	0.107593	0.55	0.904184	0.562477	1.46666	31.1451	0.241827
1000	3401	0.104829	0.0738135	0.101412	0.55	0.905159	0.565948	1.47111	29.3558	0.235881
1100	3401	0.105205	0.0739083	0.0924131	0.55	0.909019	0.566675	1.47569	26.751	0.264306
1200	3401	0.10509	0.0743338	0.0869602	0.55	0.90752	0.569938	1.47746	25.1726	0.238799
1300	3401	0.105311	0.0751118	0.0898155	0.55	0.909289	0.575903	1.48519	25.9991	0.229874
1400	3401	0.10562	0.0748968	0.0989239	0.55	0.912663	0.574254	1.48692	28.6357	0.263247
1500	3401	0.10672	0.0763435	0.114736	0.55	0.923174	0.585347	1.50852	33.2128	0.309465
1600	3401	0.106959	0.081942	0.119983	0.55	0.921697	0.628272	1.54997	34.7318	0.155684
1700	3401	0.106816	0.0894231	0.11309	0.55	0.914897	0.685631	1.60053	32.7364	0.0563944
1800	3401	0.107188	0.0886826	0.100707	0.55	0.919293	0.679954	1.59925	29.1519	0.0704808
0	3501	0.104861	0.0763796	0.100553	0.55	0.903705	0.585623	1.48933	29.1072	0.164013
100	3501	0.105014	0.075111	0.103636	0.55	0.906184	0.575896	1.48208	29.9998	0.207725
200	3501	0.104943	0.0739048	0.0996787	0.55	0.906286	0.566648	1.47293	28.8542	0.241949
300	3501	0.104703	0.0742463	0.102359	0.55	0.903536	0.569267	1.4728	29.6301	0.211905
400	3501	0.104745	0.0739988	0.106302	0.55	0.904151	0.567369	1.47152	30.7714	0.222999
500	3501	0.104455	0.0746986	0.110046	0.55	0.900643	0.572735	1.47338	31.8554	0.18207
600	3501	0.104554	0.0735017	0.106272	0.55	0.902501	0.563557	1.46606	30.7629	0.224828
700	3501	0.104966	0.0732467	0.0989483	0.55	0.906985	0.561603	1.46859	28.6428	0.268761
800	3501	0.104495	0.0738497	0.0999157	0.55	0.901648	0.566226	1.46787	28.9228	0.209248
900	3501	0.10489	0.0734835	0.0963853	0.55	0.90602	0.563418	1.46944	27.9009	0.252834
1000	3501	0.104611	0.0740818	0.0884957	0.55	0.902695	0.568005	1.4707	25.6171	0.21039
1100	3501	0.105095	0.0745346	0.0862677	0.55	0.907434	0.571477	1.47891	24.9721	0.232293
1200	3501	0.105697	0.0748067	0.0938289	0.55	0.913541	0.573563	1.4871	27.1609	0.273801
1300	3501	0.105893	0.0757943	0.0978536	0.55	0.914894	0.581136	1.49603	28.3259	0.253701
1400	3501	0.106579	0.0766655	0.108893	0.55	0.921466	0.587815	1.50928	31.5215	0.282188
1500	3501	0.106975	0.0788904	0.113207	0.55	0.924042	0.604874	1.52892	32.7703	0.236514
1600	3501	0.107151	0.085398	0.102979	0.55	0.921249	0.65477	1.57602	29.8096	0.105671
1700	3501	0.106938	0.089534	0.0922914	0.55	0.916082	0.686482	1.60256	26.7158	0.0580469
1800	3501	0.107297	0.0889968	0.0951431	0.55	0.920208	0.682363	1.60257	27.5413	0.0703912
0	3601	0.104123	0.0752372	0.107971	0.55	0.896809	0.576864	1.47367	31.2547	0.149864
100	3601	0.104424	0.0750373	0.109192	0.55	0.900079	0.575332	1.47541	31.608	0.171344
200	3601	0.104506	0.0745805	0.109911	0.55	0.901249	0.571829	1.47308	31.8161	0.188505
300	3601	0.104838	0.0741188	0.112071	0.55	0.905038	0.568289	1.47333	32.4416	0.226172
400	3601	0.10481	0.0733569	0.11205	0.55	0.905281	0.562447	1.46773	32.4354	0.250772
500	3601	0.104704	0.0735386	0.10575	0.55	0.904048	0.563841	1.46789	30.6116	0.235428
600	3601	0.104564	0.0741787	0.0993553	0.55	0.902132	0.568748	1.47088	28.7606	0.204041
700	3601	0.10472	0.0737356	0.0951972	0.55	0.904071	0.565351	1.46942	27.5569	0.22986
800	3601	0.104818	0.0734075	0.0897715	0.55	0.905321	0.562836	1.46816	25.9864	0.249505
900	3601	0.104828	0.0739164	0.0887725	0.55	0.905078	0.566738	1.47182	25.6972	0.23225
1000	3601	0.10562	0.0745386	0.0910676	0.55	0.912921	0.571508	1.48443	26.3615	0.277339
1100	3601	0.105302	0.0744979	0.0958967	0.55	0.909625	0.571196	1.48082	27.7594	0.250582
1200	3601	0.105877	0.0761745	0.102898	0.55	0.914459	0.584051	1.49851	29.7861	0.239001
1300	3601	0.106306	0.0770278	0.109386	0.55	0.918346	0.590593	1.50894	31.6644	0.244725
1400	3601	0.107172	0.0781099	0.108251	0.55	0.926661	0.59889	1.52555	31.3356	0.28112
1500	3601	0.107202	0.0799622	0.099238	0.55	0.92565	0.613092	1.53874	28.7267	0.220442
1600	3601	0.106923	0.0867913	0.091593	0.55	0.917881	0.665452	1.58333	26.5136	0.0816709
1700	3601	0.10743	0.0905352	0.0945983	0.55	0.920499	0.694158	1.61466	27.3836	0.060937
1800	3601	0.107287	0.0895404	0.094942	0.55	0.919718	0.686531	1.60625	27.4831	0.0655569
0	3701	0.104901	0.0749672	0.113048	0.55	0.905109	0.574794	1.4799	32.7243	0.204097
100	3701	0.10477	0.0747328	0.114306	0.55	0.903902	0.572997	1.4769	33.0885	0.201908
200	3701	0.10544	0.0752355	0.112565	0.55	0.910549	0.576851	1.4874	32.5843	0.235893
300	3701	0.10538	0.0750146	0.109117	0.55	0.910075	0.575157	1.48523	31.5864	0.238645
400	3701	0.105441	0.0745808	0.101015	0.55	0.911015	0.571831	1.48285	29.2411	0.25946
500	3701	0.105457	0.0738499	0.096569	0.55	0.911696	0.566228	1.47792	27.954	0.290261
600	3701	0.104581	0.0733476	0.0925545	0.55	0.902896	0.562376	1.46527	26.792	0.232229
700	3701	0.10495	0.0733542	0.0908334	0.55	0.906743	0.562427	1.46917	26.2938	0.263078
800	3701	0.104419	0.0766163	0.0905799	0.55	0.898932	0.587438	1.48637	26.2204	0.135917
900	3701	0.104186	0.0766564	0.0928478	0.55	0.896476	0.587746	1.48422	26.8768	0.124522
1000	3701	0.104207	0.0771011	0.0981951	0.55	0.896393	0.591155	1.48755	28.4248	0.11766
1100	3701	0.10546	0.0781478	0.102572	0.55	0.908716	0.59918	1.5079	29.6917	0.156788
1200	3701	0.105333	0.0796374	0.108176	0.55	0.906346	0.610602	1.51695	31.314	0.121837
1300	3701	0.105762	0.0797773	0.106047	0.55	0.910722	0.611674	1.5224	30.6978	0.138642
1400	3701	0.10635	0.0811151	0.0967852	0.55	0.915918	0.621931	1.53785	28.0166	0.141347
1500	3701	0.106339	0.0816614	0.0943726	0.55	0.915413	0.62612	1.54153	27.3182	0.130783
1600	3701	0.10657	0.090173	0.0952021	0.55	0.911804	0.691381	1.60318	27.5584	0.0470603
1700	3701	0.105464	0.092148	0.0910285	0.55	0.898937	0.706524	1.60546	26.3502	0.0246647
1800	3701	0.107433	0.0928166	0.0953252	0.55	0.918892	0.71165	1.63054	27.594	0.0461713

## Sheet: P2BD
X (microns)	Y (microns)	A4520 (OH)	A5230 (H2Om)	A2350 (CO2)	thickness (mm)	[OH] wt%	[H2Om] wt%	[H2Ot] wt%	[CO2] ppm	Q (K/s)
0	0	0.0747	0.0336781	0.0557769	0.373	0.978876	0.380752	1.35963	23.8076	59.716
100	0	0.0748	0.0332578	0.0523379	0.373	0.980921	0.376	1.35692	22.3397	69.4114
200	0	0.0745	0.0331438	0.0567034	0.373	0.976271	0.374711	1.35098	24.203	63.9639
300	0	0.0745	0.0333517	0.0464744	0.373	0.976047	0.377062	1.35311	19.8369	60.4571
400	0	0.0745	0.0328883	0.0533501	0.373	0.976546	0.371823	1.34837	22.7717	68.5726
500	0	0.0741	0.0324249	0.0511022	0.373	0.970687	0.366584	1.33727	21.8123	67.0016
600	0	0.0738	0.0328453	0.0423074	0.373	0.965478	0.371336	1.33681	18.0583	53.1814
700	0	0.0737	0.0321749	0.0431004	0.373	0.964608	0.363757	1.32837	18.3968	61.7149
800	0	0.0729	0.0310625	0.0407645	0.373	0.953121	0.351181	1.3043	17.3998	62.4278
900	0	0.0725	0.0308498	0.0436257	0.373	0.947026	0.348777	1.2958	18.621	56.8893
1000	0	0.0722	0.0307263	0.0453443	0.373	0.942424	0.34738	1.2898	19.3546	52.4613
1100	0	0.0721	0.0314799	0.0477571	0.373	0.940063	0.3559	1.29596	20.3844	40.3224
1200	0	0.0717	0.0310196	0.0416839	0.373	0.934248	0.350696	1.28494	17.7922	39.3715
1300	0	0.0714	0.0289772	0.0350495	0.373	0.931643	0.327606	1.25925	14.9604	65.411
1400	0	0.0709	0.0298672	0.0380257	0.373	0.922877	0.337667	1.26054	16.2307	40.5009
1500	0	0.0716	0.0297054	0.0455154	0.373	0.934037	0.335838	1.26988	19.4276	56.4188
1600	0	0.0718	0.0308748	0.0539281	0.373	0.935971	0.34906	1.28503	23.0184	42.8047
1700	0	0.0721	0.0310032	0.0619861	0.373	0.940559	0.350511	1.29107	26.4579	46.4321
1800	0	0.0721	0.0303794	0.0455714	0.373	0.941209	0.343458	1.28467	19.4515	55.9646
0	100	0.0744	0.0327697	0.0518639	0.373	0.975084	0.370482	1.34557	22.1373	68.2213
100	100	0.0749	0.0324642	0.0497861	0.373	0.983373	0.367028	1.3504	21.2505	89.333
200	100	0.0744	0.0327057	0.0412922	0.373	0.975153	0.369758	1.34491	17.625	69.4301
300	100	0.0743	0.0330078	0.0451343	0.373	0.973239	0.373174	1.34641	19.2649	61.5472
400	100	0.0744	0.0335862	0.0367592	0.373	0.974206	0.379713	1.35392	15.6902	54.6324
500	100	0.0744	0.0323205	0.0392674	0.373	0.975567	0.365404	1.34097	16.7607	77.2032
600	100	0.0741	0.0329162	0.0394824	0.373	0.970161	0.372138	1.3423	16.8525	58.4957
700	100	0.0741	0.0321746	0.0388888	0.373	0.970955	0.363755	1.33471	16.5991	71.8357
800	100	0.0737	0.0317844	0.0439869	0.373	0.965024	0.359342	1.32437	18.7752	68.9096
900	100	0.0736	0.0314853	0.0381163	0.373	0.963756	0.355961	1.31972	16.2694	72.2361
1000	100	0.0734	0.0314384	0.0471089	0.373	0.960637	0.355431	1.31607	20.1078	67.8443
1100	100	0.073	0.0319316	0.0473745	0.373	0.953786	0.361007	1.31479	20.2211	50.4657
1200	100	0.0729	0.0311965	0.0585974	0.373	0.95298	0.352696	1.30568	25.0115	60.0325
1300	100	0.0719	0.0299643	0.0401183	0.373	0.93849	0.338766	1.27726	17.1239	58.6649
1400	100	0.0713	0.0296532	0.0309236	0.373	0.929374	0.335249	1.26462	13.1993	50.8806
1500	100	0.0715	0.0296247	0.0364246	0.373	0.932547	0.334926	1.26747	15.5473	55.5946
1600	100	0.071	0.0305374	0.0492503	0.373	0.923757	0.345244	1.269	21.0218	34.2861
1700	100	0.0718	0.0304013	0.0480051	0.373	0.936462	0.343706	1.28017	20.4903	49.3738
1800	100	0.0716	0.0309073	0.0398867	0.373	0.932793	0.349426	1.28222	17.0251	39.1129
0	200	0.074	0.0315704	0.0428833	0.373	0.970014	0.356923	1.32694	18.3041	81.9887
100	200	0.0737	0.0318134	0.0356982	0.373	0.964993	0.359671	1.32466	15.2373	68.3441
200	200	0.0737	0.0315176	0.0406197	0.373	0.965308	0.356327	1.32163	17.338	74.3364
300	200	0.0745	0.0326354	0.0423755	0.373	0.976819	0.368964	1.34578	18.0874	73.4865
400	200	0.074	0.0333766	0.0461781	0.373	0.968082	0.377344	1.34543	19.7105	49.6229
500	200	0.0747	0.0324412	0.0369202	0.373	0.980211	0.366768	1.34698	15.7589	83.4979
600	200	0.0741	0.0321523	0.0360153	0.373	0.970979	0.363502	1.33448	15.3726	72.2851
700	200	0.0738	0.0321455	0.0375914	0.373	0.966225	0.363425	1.32965	16.0453	64.6459
800	200	0.0737	0.0326969	0.0371486	0.373	0.964052	0.369659	1.33371	15.8563	53.3266
900	200	0.0736	0.0327172	0.0404309	0.373	0.962446	0.369889	1.33233	17.2573	51.0186
1000	200	0.0738	0.0314541	0.057865	0.373	0.966962	0.355608	1.32257	24.6988	78.606
1100	200	0.0739	0.032009	0.0484303	0.373	0.967957	0.361882	1.32984	20.6718	69.772
1200	200	0.0723	0.0308449	0.0379801	0.373	0.943876	0.348721	1.2926	16.2113	52.6754
1300	200	0.0721	0.0304282	0.0359816	0.373	0.941159	0.34401	1.28517	15.3582	55.149
1400	200	0.0713	0.0296186	0.0300997	0.373	0.92941	0.334857	1.26427	12.8476	51.4316
1500	200	0.0705	0.0289516	0.0353225	0.373	0.917545	0.327317	1.24486	15.0769	45.9739
1600	200	0.071	0.028478	0.0450316	0.373	0.925871	0.321961	1.24783	19.2211	65.4362
1700	200	0.0709	0.0291374	0.0390866	0.373	0.923625	0.329416	1.25304	16.6836	50.9497
1800	200	0.0719	0.0323068	0.0417245	0.373	0.936056	0.365249	1.30131	17.8095	29.1969
0	300	0.0742	0.0330083	0.0390257	0.373	0.97165	0.37318	1.34483	16.6575	59.2467
100	300	0.0735	0.031696	0.0465132	0.373	0.961947	0.358343	1.32029	19.8535	65.4788
200	300	0.0743	0.0328555	0.0433771	0.373	0.973403	0.371452	1.34485	18.5149	64.1696
300	300	0.0748	0.034396	0.042741	0.373	0.979691	0.388868	1.36856	18.2434	51.2445
400	300	0.0753	0.035195	0.0452298	0.373	0.986782	0.397902	1.38468	19.3057	50.2821
500	300	0.0752	0.0355707	0.036963	0.373	0.984781	0.40215	1.38693	15.7771	43.9613
600	300	0.0744	0.0337285	0.0456899	0.373	0.974053	0.381322	1.35537	19.5021	52.5766
700	300	0.0745	0.0349367	0.0382677	0.373	0.974341	0.394982	1.36932	16.334	39.6212
800	300	0.0744	0.0328901	0.0553542	0.373	0.974954	0.371844	1.3468	23.6272	66.0075
900	300	0.0747	0.0337415	0.042675	0.373	0.978807	0.381469	1.36028	18.2152	58.7097
1000	300	0.0737	0.0333191	0.0687807	0.373	0.963389	0.376693	1.34008	29.358	44.891
1100	300	0.0737	0.033266	0.059356	0.373	0.963445	0.376093	1.33954	25.3353	45.5513
1200	300	0.0726	0.0317451	0.0471039	0.373	0.947665	0.358899	1.30656	20.1056	45.5164
1300	300	0.0718	0.0312061	0.0420851	0.373	0.935627	0.352805	1.28843	17.9634	38.7678
1400	300	0.0712	0.0298677	0.0432652	0.373	0.927583	0.337673	1.26526	18.4672	45.7285
1500	300	0.0705	0.0297378	0.0434572	0.373	0.916744	0.336204	1.25295	18.5491	35.8004
1600	300	0.0706	0.028982	0.0376448	0.373	0.919081	0.32766	1.24674	16.0681	47.4179
1700	300	0.0697	0.0289127	0.0438827	0.373	0.905081	0.326876	1.23196	18.7307	33.4549
1800	300	0.0703	0.0296324	0.0427878	0.373	0.913723	0.335013	1.24874	18.2634	34.076
0	400	0.0731	0.0316767	0.0481667	0.373	0.955636	0.358125	1.31376	20.5593	56.4495
100	400	0.0731	0.0315979	0.0411418	0.373	0.955719	0.357234	1.31295	17.5608	57.7441
200	400	0.0735	0.0314816	0.0405604	0.373	0.962175	0.35592	1.31809	17.3126	69.6139
300	400	0.0747	0.0328608	0.0507826	0.373	0.979758	0.371512	1.35127	21.6758	74.456
400	400	0.0754	0.0344705	0.0613626	0.373	0.989165	0.389711	1.37888	26.1917	62.9702
500	400	0.0748	0.0346793	0.0683642	0.373	0.979384	0.392072	1.37146	29.1803	47.5634
600	400	0.0746	0.0348083	0.0634856	0.373	0.976067	0.39353	1.3696	27.0979	42.5908
700	400	0.0744	0.0348941	0.0413013	0.373	0.972799	0.394499	1.3673	17.6289	38.5476
800	400	0.0737	0.0329767	0.053233	0.373	0.963754	0.372822	1.33658	22.7217	49.3403
900	400	0.0735	0.0320955	0.0468918	0.373	0.961523	0.36286	1.32438	20.0151	58.4558
1000	400	0.073	0.0317388	0.0535785	0.373	0.953989	0.358827	1.31282	22.8692	53.3393
1100	400	0.0722	0.0323654	0.045652	0.373	0.940713	0.365911	1.30662	19.4859	32.4225
1200	400	0.071	0.0305711	0.0483682	0.373	0.923723	0.345626	1.26935	20.6453	33.9329
1300	400	0.0698	0.0287577	0.0398191	0.373	0.906798	0.325124	1.23192	16.9962	36.6927
1400	400	0.0697	0.0275302	0.042896	0.373	0.906474	0.311247	1.21772	18.3095	52.9046
1500	400	0.0692	0.0282229	0.0423993	0.373	0.89798	0.319078	1.21706	18.0975	34.058
1600	400	0.0679	0.0260202	0.0430586	0.373	0.87996	0.294175	1.17414	18.379	42.2622
1700	400	0.0686	0.0268511	0.0398192	0.373	0.89001	0.303569	1.19358	16.9963	42.2962
1800	400	0.0685	0.0278977	0.0418871	0.373	0.887419	0.315401	1.20282	17.8789	28.216
0	500	0.0729	0.0322829	0.0415652	0.373	0.951835	0.364979	1.31681	17.7415	43.8874
100	500	0.073	0.0316445	0.0380487	0.373	0.954088	0.357761	1.31185	16.2405	54.8069
200	500	0.0729	0.0307556	0.0390581	0.373	0.953445	0.347711	1.30116	16.6714	68.3051
300	500	0.074	0.0316726	0.0477908	0.373	0.969904	0.358079	1.32798	20.3988	79.6537
400	500	0.0747	0.0346782	0.0602332	0.373	0.977796	0.392059	1.36986	25.7097	45.7953
500	500	0.0751	0.0350734	0.0739703	0.373	0.98373	0.396527	1.38026	31.5732	48.1059
600	500	0.0753	0.0349239	0.0639146	0.373	0.987077	0.394837	1.38191	27.281	53.9256
700	500	0.0739	0.0332366	0.0492121	0.373	0.966646	0.375761	1.34241	21.0055	49.6144
800	500	0.0736	0.0334074	0.0456439	0.373	0.961712	0.377692	1.3394	19.4824	42.1396
900	500	0.0726	0.0323694	0.034434	0.373	0.94701	0.365957	1.31297	14.6977	38.0202
1000	500	0.0729	0.0315538	0.0450257	0.373	0.952604	0.356736	1.30934	19.2186	54.1155
1100	500	0.0717	0.0308094	0.0659632	0.373	0.934466	0.34832	1.28279	28.1555	41.938
1200	500	0.0712	0.0297039	0.0493152	0.373	0.927752	0.335822	1.26357	21.0495	48.1157
1300	500	0.0686	0.0275908	0.0447231	0.373	0.889276	0.311931	1.20121	19.0894	32.7229
1400	500	0.068	0.0261146	0.0383052	0.373	0.881419	0.295242	1.17666	16.35	42.6207
1500	500	0.0676	0.025489	0.0459528	0.373	0.875831	0.288169	1.164	19.6143	45.1609
1600	500	0.0675	0.0254822	0.0412916	0.373	0.874288	0.288093	1.16238	17.6247	43.3789
1700	500	0.0674	0.0252114	0.0379746	0.373	0.873004	0.285031	1.15803	16.2089	45.963
1800	500	0.068	0.0263795	0.0452419	0.373	0.881158	0.298237	1.1794	19.3108	38.7498
0	600	0.0715	0.0292545	0.0377938	0.373	0.93293	0.330741	1.26367	16.1318	62.379
100	600	0.072	0.0294566	0.0364711	0.373	0.940594	0.333026	1.27362	15.5672	71.2746
200	600	0.0719	0.0278994	0.0419317	0.373	0.940636	0.315421	1.25606	17.8979	111.687
300	600	0.0719	0.0285565	0.0390977	0.373	0.939954	0.32285	1.2628	16.6883	90.7174
400	600	0.074	0.0300704	0.04146	0.373	0.971618	0.339965	1.31158	17.6966	126.126
500	600	0.0749	0.0316334	0.058839	0.373	0.984272	0.357635	1.34191	25.1146	112.282
600	600	0.0751	0.0332423	0.0508613	0.373	0.985718	0.375825	1.36154	21.7094	77.9219
700	600	0.0747	0.0319365	0.0443234	0.373	0.980756	0.361063	1.34182	18.9188	95.9564
800	600	0.0742	0.0317782	0.0531346	0.373	0.972969	0.359272	1.33224	22.6797	83.3316
900	600	0.0735	0.0315394	0.0352194	0.373	0.962114	0.356573	1.31869	15.0329	68.4716
1000	600	0.0726	0.0301893	0.046426	0.373	0.949298	0.341309	1.29061	19.8163	71.9881
1100	600	0.0727	0.0285755	0.0432513	0.373	0.952574	0.323064	1.27564	18.4612	122.134
1200	600	0.0712	0.0274795	0.0418954	0.373	0.930041	0.310673	1.24071	17.8824	97.7676
1300	600	0.0693	0.0257794	0.0417773	0.373	0.901985	0.291452	1.19344	17.8321	82.2658
1400	600	0.0681	0.0249454	0.0412	0.373	0.884121	0.282024	1.16615	17.5856	68.1279
1500	600	0.067	0.0234823	0.0424143	0.373	0.868492	0.265482	1.13397	18.1039	75.2371
1600	600	0.0671	0.0230922	0.0427595	0.373	0.870418	0.261072	1.13149	18.2513	91.4936
1700	600	0.0667	0.0224888	0.0375394	0.373	0.86481	0.25425	1.11906	16.0232	98.7157
1800	600	0.0675	0.0231528	0.0348774	0.373	0.876561	0.261757	1.13832	14.8869	105.323
0	700	0.0707	0.0256594	0.034865	0.373	0.924043	0.290096	1.21414	14.8816	148.435
100	700	0.0707	0.0251923	0.0420007	0.373	0.924521	0.284814	1.20934	17.9274	174.439
200	700	0.0704	0.0267754	0.0380647	0.373	0.918194	0.302713	1.22091	16.2474	90.3724
300	700	0.071	0.0267153	0.0419416	0.373	0.92768	0.302034	1.22971	17.9022	116.46
400	700	0.072	0.0277206	0.0391662	0.373	0.942401	0.313399	1.2558	16.7176	122.811
500	700	0.0732	0.030096	0.044476	0.373	0.95889	0.340254	1.29914	18.9839	93.0225
600	700	0.0738	0.0306165	0.0344486	0.373	0.967856	0.346138	1.31399	14.7039	99.9752
700	700	0.0738	0.0308095	0.0532058	0.373	0.96765	0.348321	1.31597	22.7102	94.5512
800	700	0.0737	0.0302384	0.0508621	0.373	0.966671	0.341864	1.30853	21.7098	107.53
900	700	0.0738	0.0300822	0.042187	0.373	0.968426	0.340099	1.30852	18.0069	116.793
1000	700	0.0731	0.0292665	0.0418673	0.373	0.958182	0.330876	1.28906	17.8705	114.827
1100	700	0.0724	0.0291022	0.0447018	0.373	0.947277	0.329018	1.2763	19.0803	92.7227
1200	700	0.0716	0.0287029	0.0408054	0.373	0.935074	0.324504	1.25958	17.4172	77.1333
1300	700	0.0702	0.0263818	0.0458744	0.373	0.915458	0.298263	1.21372	19.5808	95.4752
1400	700	0.0684	0.0255306	0.0353019	0.373	0.888207	0.288639	1.17685	15.0681	62.2659
1500	700	0.0679	0.0250708	0.0484679	0.373	0.880892	0.283441	1.16433	20.6878	59.8401
1600	700	0.0677	0.0235603	0.0401349	0.373	0.879268	0.266364	1.14563	17.131	97.5414
1700	700	0.0678	0.0235873	0.0496803	0.373	0.880794	0.266669	1.14746	21.2054	100.555
1800	700	0.0681	0.0236999	0.0411533	0.373	0.885347	0.267943	1.15329	17.5657	108.778
0	800	0.0691	0.0237297	0.0430305	0.373	0.900911	0.268279	1.16919	18.3669	159.91
100	800	0.0691	0.0237793	0.0436691	0.373	0.900861	0.26884	1.1697	18.6395	156.98
200	800	0.0689	0.0245263	0.0434761	0.373	0.896993	0.277285	1.17428	18.5571	110.07
300	800	0.0694	0.0249183	0.0553775	0.373	0.904411	0.281717	1.18613	23.6371	116.382
400	800	0.0699	0.0254969	0.0477126	0.373	0.911654	0.288259	1.19991	20.3654	115.312
500	800	0.0702	0.0257705	0.0494158	0.373	0.916079	0.291352	1.20743	21.0924	117.834
600	800	0.0714	0.0278546	0.0487893	0.373	0.932802	0.314914	1.24772	20.825	93.532
700	800	0.0726	0.0290659	0.0569287	0.373	0.950477	0.328608	1.27909	24.2992	101.158
800	800	0.0729	0.0291895	0.0518711	0.373	0.955095	0.330006	1.2851	22.1405	109.066
900	800	0.0731	0.0291713	0.0605088	0.373	0.958283	0.3298	1.28808	25.8273	118.176
1000	800	0.0725	0.0284833	0.0482025	0.373	0.949506	0.322021	1.27153	20.5746	116.601
1100	800	0.0723	0.0288796	0.0393879	0.373	0.94593	0.326502	1.27243	16.8122	95.5976
1200	800	0.0717	0.0274951	0.0410596	0.373	0.937901	0.31085	1.24875	17.5257	117.843
1300	800	0.0704	0.0265479	0.0403198	0.373	0.918426	0.30014	1.21857	17.2099	97.6025
1400	800	0.0697	0.0261522	0.0437245	0.373	0.907862	0.295667	1.20353	18.6632	84.7508
1500	800	0.0692	0.0258039	0.043704	0.373	0.9004	0.291729	1.19213	18.6544	78.3319
1600	800	0.0693	0.0254251	0.0527872	0.373	0.90234	0.287447	1.18979	22.5315	93.2854
1700	800	0.0698	0.0263411	0.0591993	0.373	0.909236	0.297803	1.20704	25.2684	82.6199
1800	800	0.0694	0.0250473	0.0439829	0.373	0.904282	0.283176	1.18746	18.7735	111.109
0	900	0.0682	0.0236444	0.0482651	0.373	0.886958	0.267315	1.15427	20.6013	115.676
100	900	0.0679	0.0230807	0.0398764	0.373	0.882845	0.260942	1.14379	17.0207	127.395
200	900	0.0679	0.0227123	0.0328745	0.373	0.883207	0.256777	1.13998	14.032	147.128
300	900	0.0684	0.0229751	0.0474589	0.373	0.890734	0.259749	1.15048	20.2571	161.89
400	900	0.0685	0.0233479	0.0461801	0.373	0.891924	0.263963	1.15589	19.7113	145.964
500	900	0.0693	0.0249947	0.0503646	0.373	0.902771	0.282581	1.18535	21.4974	108.833
600	900	0.0704	0.0266866	0.0517179	0.373	0.918285	0.301709	1.21999	22.0751	93.1236
700	900	0.071	0.0281719	0.0588673	0.373	0.926185	0.318501	1.24469	25.1266	72.2108
800	900	0.0717	0.0291547	0.0595282	0.373	0.936181	0.329612	1.26579	25.4088	69.614
900	900	0.0722	0.0295995	0.0790066	0.373	0.9436	0.334642	1.27824	33.7229	73.7247
1000	900	0.0716	0.0297586	0.0475505	0.373	0.933982	0.33644	1.27042	20.2963	55.5001
1100	900	0.0722	0.0305507	0.0451752	0.373	0.942607	0.345395	1.288	19.2824	55.2896
1200	900	0.0718	0.0289401	0.0355296	0.373	0.937979	0.327186	1.26516	15.1653	77.395
1300	900	0.0714	0.0281714	0.0335489	0.373	0.932475	0.318495	1.25097	14.3199	84.4811
1400	900	0.0704	0.0285273	0.0402794	0.373	0.916412	0.322519	1.23893	17.1927	50.6201
1500	900	0.0707	0.0277801	0.0415104	0.373	0.921876	0.314071	1.23595	17.7181	72.8495
1600	900	0.0716	0.0295737	0.0501924	0.373	0.934173	0.334349	1.26852	21.4239	58.7633
1700	900	0.0717	0.0299528	0.0499118	0.373	0.935354	0.338635	1.27399	21.3041	54.4003
1800	900	0.0723	0.0300994	0.051566	0.373	0.944655	0.340293	1.28495	22.0102	65.8489
0	1000	0.0691	0.0240552	0.0620487	0.373	0.900586	0.27196	1.17255	26.4846	141.706
100	1000	0.0681	0.0238718	0.0487179	0.373	0.885178	0.269886	1.15506	20.7945	101.888
200	1000	0.0683	0.0242389	0.0403834	0.373	0.887928	0.274036	1.16196	17.2371	96.2063
300	1000	0.0687	0.0245807	0.0401685	0.373	0.89382	0.2779	1.17172	17.1454	99.5874
400	1000	0.0686	0.0248389	0.0492659	0.373	0.892005	0.280819	1.17282	21.0284	86.9824
500	1000	0.0687	0.0249759	0.0501364	0.373	0.893427	0.282368	1.1758	21.4	86.1524
600	1000	0.0693	0.0252888	0.0455339	0.373	0.902477	0.285905	1.18838	19.4355	97.9386
700	1000	0.0696	0.0251437	0.0559065	0.373	0.907313	0.284265	1.19158	23.8629	116.152
800	1000	0.0709	0.0267211	0.0606808	0.373	0.926101	0.302098	1.2282	25.9007	111.845
900	1000	0.0713	0.0282263	0.0678388	0.373	0.930845	0.319116	1.24996	28.956	79.832
1000	1000	0.0719	0.0288239	0.0473272	0.373	0.939676	0.325872	1.26555	20.2009	83.4276
1100	1000	0.072	0.0290023	0.0428963	0.373	0.941067	0.327889	1.26896	18.3097	82.0231
1200	1000	0.0716	0.0288007	0.0468778	0.373	0.934973	0.32561	1.26058	20.0091	74.7936
1300	1000	0.071	0.0282112	0.0511707	0.373	0.926145	0.318945	1.24509	21.8415	71.301
1400	1000	0.0716	0.0291963	0.0449739	0.373	0.934564	0.330082	1.26465	19.1965	66.0754
1500	1000	0.0723	0.0304191	0.0505407	0.373	0.944321	0.343907	1.28823	21.5726	59.813
1600	1000	0.0725	0.0305406	0.0545485	0.373	0.94735	0.345281	1.29263	23.2832	62.3576
1700	1000	0.0736	0.032088	0.0535622	0.373	0.963115	0.362775	1.32589	22.8623	60.8712
1800	1000	0.0732	0.0320096	0.0554707	0.373	0.956865	0.361889	1.31875	23.6769	53.3466
0	1100	0.0695	0.0253729	0.0599571	0.373	0.905518	0.286857	1.19238	25.5918	102.911
100	1100	0.0694	0.025453	0.0670626	0.373	0.903875	0.287763	1.19164	28.6247	96.1256
200	1100	0.0695	0.0250978	0.0506756	0.373	0.905795	0.283746	1.18954	21.6301	113.512
300	1100	0.0692	0.025257	0.0442058	0.373	0.900946	0.285547	1.18649	18.8686	95.1787
400	1100	0.0697	0.0249792	0.0549724	0.373	0.909044	0.282405	1.19145	23.4642	128.091
500	1100	0.0688	0.0252289	0.0572552	0.373	0.894734	0.285228	1.17996	24.4386	81.8384
600	1100	0.0691	0.0252531	0.0508266	0.373	0.899389	0.285502	1.18489	21.6946	91.5711
700	1100	0.0693	0.0254202	0.0497187	0.373	0.902345	0.287391	1.18974	21.2217	93.4501
800	1100	0.0698	0.0254654	0.059519	0.373	0.910119	0.287902	1.19802	25.4048	112.115
900	1100	0.0706	0.0271796	0.0595644	0.373	0.92092	0.307283	1.2282	25.4242	85.3903
1000	1100	0.0715	0.0279855	0.0498062	0.373	0.934241	0.316394	1.25064	21.2591	93.2114
1100	1100	0.0713	0.027741	0.0507683	0.373	0.931345	0.31363	1.24497	21.6697	93.3446
1200	1100	0.0706	0.0292706	0.0461821	0.373	0.918786	0.330922	1.24971	19.7122	43.2481
1300	1100	0.0711	0.0272772	0.0531337	0.373	0.928676	0.308386	1.23706	22.6794	100.498
1400	1100	0.0714	0.0277484	0.0480679	0.373	0.932912	0.313713	1.24662	20.5171	96.7962
1500	1100	0.0722	0.0298482	0.054058	0.373	0.94334	0.337452	1.28079	23.0739	68.3458
1600	1100	0.073	0.0314726	0.054632	0.373	0.95427	0.355817	1.31009	23.3189	57.5973
1700	1100	0.0735	0.0322996	0.0613718	0.373	0.961306	0.365167	1.32647	26.1957	55.1831
1800	1100	0.0738	0.0326956	0.0621318	0.373	0.965638	0.369645	1.33528	26.5201	55.4357
0	1200	0.0711	0.0274631	0.0441701	0.373	0.928485	0.310488	1.23897	18.8534	94.5539
100	1200	0.0709	0.027056	0.0422196	0.373	0.925758	0.305885	1.23164	18.0208	100.045
200	1200	0.0706	0.026001	0.0527697	0.373	0.922123	0.293958	1.21608	22.524	127.073
300	1200	0.0701	0.0259185	0.0477164	0.373	0.914361	0.293025	1.20739	20.3671	107.657
400	1200	0.0704	0.0262059	0.0534516	0.373	0.918774	0.296274	1.21505	22.8151	109.65
500	1200	0.0701	0.025853	0.0784436	0.373	0.914427	0.292285	1.20671	33.4825	110.128
600	1200	0.0693	0.0255913	0.0626659	0.373	0.902174	0.289326	1.1915	26.7481	87.932
700	1200	0.0694	0.0264236	0.0482846	0.373	0.902901	0.298735	1.20164	20.6096	68.3505
800	1200	0.0698	0.0262075	0.0510925	0.373	0.90937	0.296292	1.20566	21.8081	86.5235
900	1200	0.0704	0.0274688	0.0482005	0.373	0.917489	0.310552	1.22804	20.5737	71.6535
1000	1200	0.071	0.0281738	0.0468568	0.373	0.926183	0.318523	1.24471	20.0002	72.1665
1100	1200	0.0706	0.0279414	0.0536284	0.373	0.920143	0.315895	1.23604	22.8905	66.4064
1200	1200	0.0705	0.0274523	0.0447655	0.373	0.919073	0.310365	1.22944	19.1075	74.9712
1300	1200	0.0698	0.0273883	0.0527764	0.373	0.908179	0.309642	1.21782	22.5269	57.8082
1400	1200	0.0706	0.0279887	0.0600196	0.373	0.920094	0.31643	1.23652	25.6185	65.3851
1500	1200	0.071	0.0297276	0.0601632	0.373	0.924589	0.336089	1.26068	25.6798	44.0589
1600	1200	0.072	0.0302431	0.0518946	0.373	0.939776	0.341917	1.28169	22.1505	56.0648
1700	1200	0.0731	0.0318735	0.0582991	0.373	0.955428	0.36035	1.31578	24.8841	53.3506
1800	1200	0.0728	0.0319385	0.0438523	0.373	0.950619	0.361085	1.3117	18.7177	46.5712
0	1300	0.0722	0.0290177	0.0501069	0.373	0.944207	0.328064	1.27227	21.3874	88.1616
100	1300	0.0718	0.0280575	0.0450794	0.373	0.938895	0.317208	1.2561	19.2415	102.229
200	1300	0.0715	0.027815	0.0433534	0.373	0.934418	0.314467	1.24888	18.5048	98.4612
300	1300	0.071	0.0274082	0.042741	0.373	0.926969	0.309867	1.23684	18.2434	92.5982
400	1300	0.0706	0.0277572	0.0469448	0.373	0.920331	0.313812	1.23414	20.0377	70.5415
500	1300	0.0704	0.0269548	0.0563496	0.373	0.918012	0.304741	1.22275	24.052	85.0755
600	1300	0.0702	0.0274007	0.0563661	0.373	0.914425	0.309782	1.22421	24.0591	67.6649
700	1300	0.0698	0.0267308	0.0509477	0.373	0.908843	0.302208	1.21105	21.7463	72.2664
800	1300	0.0709	0.0276992	0.0478635	0.373	0.925099	0.313157	1.23826	20.4298	80.9471
900	1300	0.0715	0.0291536	0.0431716	0.373	0.933034	0.3296	1.26263	18.4272	64.3767
1000	1300	0.0711	0.0290996	0.0419849	0.373	0.926803	0.32899	1.25579	17.9207	55.8683
1100	1300	0.0705	0.0267491	0.0481755	0.373	0.91979	0.302416	1.22221	20.563	94.8299
1200	1300	0.0695	0.0270773	0.0393976	0.373	0.903806	0.306125	1.20993	16.8163	56.8393
1300	1300	0.0696	0.0267076	0.0330905	0.373	0.905739	0.301947	1.20769	14.1242	67.1933
1400	1300	0.0705	0.0279784	0.0397617	0.373	0.918537	0.316313	1.23485	16.9717	63.0348
1500	1300	0.0712	0.0295626	0.0518192	0.373	0.927897	0.334224	1.26212	22.1183	50.2816
1600	1300	0.072	0.0302231	0.0564295	0.373	0.939797	0.341691	1.28149	24.0861	56.4059
1700	1300	0.0727	0.0316364	0.0533187	0.373	0.949358	0.357669	1.30703	22.7583	48.8617
1800	1300	0.0727	0.0328633	0.0370422	0.373	0.948068	0.371541	1.31961	15.8109	34.376
0	1400	0.073	0.0298957	0.041971	0.373	0.955934	0.337989	1.29392	17.9147	91.557
100	1400	0.0725	0.0289717	0.054725	0.373	0.948994	0.327543	1.27654	23.3586	100.258
200	1400	0.0723	0.028628	0.0503295	0.373	0.946193	0.323658	1.26985	21.4824	103.359
300	1400	0.0717	0.0281808	0.0417214	0.373	0.93719	0.318601	1.25579	17.8082	94.5956
400	1400	0.0717	0.0276222	0.0491502	0.373	0.937769	0.312287	1.25006	20.9791	113.112
500	1400	0.0715	0.0289013	0.0541268	0.373	0.933295	0.326747	1.26004	23.1033	69.6814
600	1400	0.0715	0.0275173	0.0540608	0.373	0.934725	0.311101	1.24583	23.0751	108.402
700	1400	0.0711	0.0287706	0.0472958	0.373	0.927141	0.325269	1.25241	20.1876	62.0111
800	1400	0.0722	0.0285288	0.0434364	0.373	0.944717	0.322536	1.26725	18.5402	102.633
900	1400	0.0717	0.0284598	0.0541905	0.373	0.936901	0.321757	1.25866	23.1305	86.5821
1000	1400	0.072	0.0291107	0.0424717	0.373	0.940954	0.329114	1.27007	18.1284	79.311
1100	1400	0.0706	0.0277617	0.0451339	0.373	0.920326	0.313864	1.23419	19.2647	70.4366
1200	1400	0.0701	0.0273579	0.0440858	0.373	0.912902	0.309298	1.2222	18.8174	65.9382
1300	1400	0.0703	0.0277375	0.0412113	0.373	0.915649	0.31359	1.22924	17.5904	62.9748
1400	1400	0.0713	0.028739	0.0378712	0.373	0.930317	0.324913	1.25523	16.1648	67.7951
1500	1400	0.0721	0.0302676	0.0370436	0.373	0.941326	0.342194	1.28352	15.8115	57.8839
1600	1400	0.0729	0.0312105	0.0405675	0.373	0.952965	0.352855	1.30582	17.3157	59.7879
1700	1400	0.0731	0.031494	0.0428482	0.373	0.955829	0.35606	1.31189	18.2892	59.4996
1800	1400	0.074	0.0331616	0.0325308	0.373	0.968312	0.374913	1.34323	13.8853	52.631
0	1500	0.0738	0.0301386	0.0474398	0.373	0.968366	0.340735	1.3091	20.249	114.885
100	1500	0.0729	0.0302541	0.0464315	0.373	0.953973	0.342042	1.29601	19.8186	79.2179
200	1500	0.0727	0.0295624	0.0395126	0.373	0.951537	0.334222	1.28576	16.8654	90.3263
300	1500	0.0721	0.0289778	0.0383933	0.373	0.94267	0.327612	1.27028	16.3876	85.8963
400	1500	0.072	0.0296866	0.0458132	0.373	0.940355	0.335625	1.27598	19.5547	66.417
500	1500	0.0724	0.030329	0.0350502	0.373	0.945993	0.342888	1.28888	14.9607	63.8942
600	1500	0.0727	0.0300772	0.0392067	0.373	0.950996	0.340042	1.29104	16.7348	77.3606
700	1500	0.0725	0.0302404	0.0469571	0.373	0.947665	0.341886	1.28955	20.043	68.2097
800	1500	0.0735	0.0305378	0.0479156	0.373	0.963178	0.345249	1.30843	20.4521	91.4456
900	1500	0.0722	0.0307272	0.0444865	0.373	0.942423	0.34739	1.28981	18.9884	52.4473
1000	1500	0.0719	0.0291314	0.0337003	0.373	0.939356	0.329349	1.26871	14.3845	75.8065
1100	1500	0.0693	0.0291358	0.0310793	0.373	0.898623	0.329399	1.22802	13.2658	26.2616
1200	1500	0.0691	0.0288726	0.0223768	0.373	0.895774	0.326423	1.2222	9.55122	26.2931
1300	1500	0.0687	0.0285386	0.0337622	0.373	0.889889	0.322647	1.21254	14.4109	24.7473
1400	1500	0.0692	0.0297219	0.0300043	0.373	0.896481	0.336024	1.2325	12.8069	20.7851
1500	1500	0.0709	0.0303311	0.0353641	0.373	0.922402	0.342913	1.26531	15.0947	35.0665
1600	1500	0.0717	0.0336298	0.0424713	0.373	0.931543	0.380206	1.31175	18.1283	18.3733
1700	1500	0.0722	0.0339814	0.0467687	0.373	0.939027	0.384182	1.32321	19.9626	20.4809
1800	1500	0.0721	0.0342062	0.0512592	0.373	0.937221	0.386723	1.32394	21.8792	18.4534
0	1600	0.0725	0.032357	0.0379195	0.373	0.945447	0.365817	1.31126	16.1854	36.6633
100	1600	0.0723	0.0323877	0.034495	0.373	0.942264	0.366164	1.30843	14.7237	33.5397
200	1600	0.0713	0.0308939	0.0362838	0.373	0.928096	0.349275	1.27737	15.4872	34.7687
300	1600	0.0714	0.0310764	0.0402448	0.373	0.929477	0.351339	1.28082	17.1779	34.2734
400	1600	0.0715	0.0317426	0.0426284	0.373	0.930359	0.35887	1.28923	18.1953	29.2587
500	1600	0.0719	0.0316193	0.0389598	0.373	0.936771	0.357476	1.29425	16.6294	35.71
600	1600	0.0719	0.0325417	0.0469581	0.373	0.935812	0.367904	1.30372	20.0434	27.2735
700	1600	0.0719	0.0334882	0.0268165	0.373	0.934828	0.378605	1.31343	11.4462	20.7893
800	1600	0.0721	0.0321673	0.0370117	0.373	0.939346	0.363671	1.30302	15.7979	32.9778
900	1600	0.071	0.0316476	0.0449551	0.373	0.922618	0.357796	1.28041	19.1885	24.4767
1000	1600	0.0712	0.0308487	0.0367158	0.373	0.926573	0.348764	1.27534	15.6716	33.8373
1100	1600	0.0701	0.030511	0.0390085	0.373	0.909708	0.344946	1.25465	16.6502	23.7568
1200	1600	0.0697	0.0296511	0.0376744	0.373	0.904337	0.335224	1.23956	16.0808	26.3387
1300	1600	0.0698	0.0296665	0.0385058	0.373	0.905881	0.335398	1.24128	16.4356	27.342
1400	1600	0.0703	0.0314761	0.0325051	0.373	0.91185	0.355857	1.26771	13.8743	19.1921
1500	1600	0.0709	0.0322939	0.0322301	0.373	0.92039	0.365102	1.28549	13.757	19.3536
1600	1600	0.0719	0.033253	0.0354263	0.373	0.935073	0.375946	1.31102	15.1212	22.23
1700	1600	0.0722	0.0335899	0.0397398	0.373	0.939435	0.379755	1.31919	16.9624	22.8616
1800	1600	0.0717	0.0339407	0.044434	0.373	0.931221	0.383721	1.31494	18.966	16.8229
0	1700	0.0737	0.034672	0.0460789	0.373	0.961948	0.391988	1.35394	19.6681	31.0868
100	1700	0.0738	0.0343171	0.0386187	0.373	0.963908	0.387977	1.35189	16.4838	35.5722
200	1700	0.0726	0.0335638	0.039203	0.373	0.945757	0.37946	1.32522	16.7333	27.1108
300	1700	0.0727	0.0329503	0.0434343	0.373	0.947977	0.372524	1.3205	18.5393	33.5406
400	1700	0.0726	0.0323699	0.0383853	0.373	0.94701	0.365962	1.31297	16.3842	38.015
500	1700	0.0727	0.0329053	0.03684	0.373	0.948024	0.372015	1.32004	15.7246	33.9702
600	1700	0.0725	0.0341503	0.0433602	0.373	0.943568	0.386091	1.32966	18.5077	22.106
700	1700	0.0734	0.0337635	0.0432379	0.373	0.95817	0.381718	1.33989	18.4555	35.3247
800	1700	0.0732	0.0331484	0.0409873	0.373	0.95566	0.374764	1.33042	17.4949	38.6976
900	1700	0.0726	0.0329781	0.04181	0.373	0.946372	0.372838	1.31921	17.846	31.9696
1000	1700	0.0714	0.0320041	0.0373397	0.373	0.92852	0.361826	1.29035	15.9379	25.9867
1100	1700	0.0707	0.0316415	0.0278805	0.373	0.91793	0.357727	1.27566	11.9004	21.6241
1200	1700	0.0706	0.0305017	0.0309823	0.373	0.91753	0.344841	1.26237	13.2243	29.3866
1300	1700	0.0711	0.0308512	0.0381727	0.373	0.925003	0.348792	1.27379	16.2935	32.4541
1400	1700	0.0716	0.0316051	0.0509199	0.373	0.932071	0.357316	1.28939	21.7344	31.7491
1500	1700	0.0716	0.0322859	0.0424366	0.373	0.931366	0.365012	1.29638	18.1135	25.9771
1600	1700	0.0718	0.0328379	0.0429584	0.373	0.933934	0.371253	1.30519	18.3362	24.0286
1700	1700	0.0723	0.0334896	0.0436278	0.373	0.941113	0.378621	1.31973	18.6219	24.5012
1800	1700	0.0725	0.0335104	0.0570324	0.373	0.944238	0.378857	1.32309	24.3435	26.4259
0	1800	0.0735	0.034303	0.0404738	0.373	0.959178	0.387817	1.34699	17.2757	31.7224
100	1800	0.0737	0.0339346	0.0387809	0.373	0.962733	0.383653	1.34639	16.5531	37.9348
200	1800	0.0733	0.0342207	0.0403619	0.373	0.956105	0.386887	1.34299	17.2279	29.9599
300	1800	0.0733	0.0335678	0.0451216	0.373	0.956797	0.379505	1.3363	19.2595	35.8353
400	1800	0.0726	0.0328177	0.0448721	0.373	0.94654	0.371025	1.31756	19.153	33.457
500	1800	0.0719	0.0321832	0.036464	0.373	0.936185	0.363851	1.30004	15.5641	30.2677
600	1800	0.072	0.032486	0.0321588	0.373	0.937442	0.367274	1.30472	13.7265	28.872
700	1800	0.0726	0.0332299	0.0589654	0.373	0.946107	0.375685	1.32179	25.1685	29.7758
800	1800	0.0725	0.0332905	0.0524444	0.373	0.944469	0.37637	1.32084	22.3851	28.1124
900	1800	0.0724	0.0323845	0.0410172	0.373	0.943842	0.366127	1.30997	17.5076	34.9474
1000	1800	0.0715	0.0319442	0.0337199	0.373	0.93015	0.361149	1.2913	14.3929	27.5642
1100	1800	0.0712	0.031104	0.0367133	0.373	0.926311	0.351651	1.27796	15.6706	31.3181
1200	1800	0.0705	0.031462	0.0465165	0.373	0.914987	0.355697	1.27068	19.8549	20.9841
1300	1800	0.0709	0.0309336	0.0413568	0.373	0.921784	0.349724	1.27151	17.6526	29.1434
1400	1800	0.0696	0.0260562	0.0516985	0.373	0.906395	0.294582	1.20098	22.0668	84.1957
1500	1800	0.0703	0.027391	0.0475647	0.373	0.916001	0.309673	1.22567	20.3023	70.6557
1600	1800	0.0703	0.0284679	0.0583907	0.373	0.914907	0.321848	1.23675	24.9232	49.55
1700	1800	0.0707	0.0279905	0.048491	0.373	0.921661	0.31645	1.23811	20.6977	68.0055
1800	1800	0.0705	0.0281121	0.0432072	0.373	0.918401	0.317825	1.23623	18.4424	60.3352
0	1900	0.0718	0.0292132	0.0394544	0.373	0.937695	0.330274	1.26797	16.8406	71.0823
100	1900	0.0722	0.0293152	0.0335015	0.373	0.943896	0.331427	1.27532	14.2996	80.4359
200	1900	0.0718	0.0289212	0.0436837	0.373	0.937998	0.326973	1.26497	18.6458	77.8517
300	1900	0.0718	0.0280306	0.0426282	0.373	0.938923	0.316903	1.25583	18.1952	103.109
400	1900	0.0713	0.0293803	0.0422687	0.373	0.929656	0.332162	1.26182	18.0418	55.4013
500	1900	0.0707	0.0276461	0.0454557	0.373	0.922013	0.312556	1.23457	19.4021	76.1255
600	1900	0.0704	0.0269722	0.0407091	0.373	0.917994	0.304937	1.22293	17.3761	84.5814
700	1900	0.0701	0.0278468	0.041567	0.373	0.912407	0.314826	1.22723	17.7423	56.0233
800	1900	0.0703	0.026765	0.0410938	0.373	0.916637	0.302595	1.21923	17.5403	87.1845
900	1900	0.0701	0.0275825	0.0322918	0.373	0.912675	0.311838	1.22451	13.7833	61.1682
1000	1900	0.0691	0.0261252	0.0456047	0.373	0.898518	0.295362	1.19388	19.4657	67.1461
1100	1900	0.0688	0.0253312	0.0374918	0.373	0.894632	0.286385	1.18102	16.0028	78.866
1200	1900	0.0682	0.0261891	0.0409967	0.373	0.884449	0.296084	1.18053	17.4989	45.1666
1300	1900	0.0682	0.0254293	0.0357384	0.373	0.885198	0.287494	1.17269	15.2544	59.4514
1400	1900	0.0679	0.0258651	0.0388866	0.373	0.880113	0.292422	1.17253	16.5982	44.7086
1500	1900	0.0685	0.0258467	0.0355528	0.373	0.88945	0.292213	1.18166	15.1752	57.9091
1600	1900	0.0685	0.0257339	0.0343943	0.373	0.889562	0.290938	1.1805	14.6807	60.305
1700	1900	0.0679	0.0254078	0.0438547	0.373	0.880561	0.287251	1.16781	18.7187	52.8429
1800	1900	0.0682	0.0260872	0.0484686	0.373	0.88455	0.294932	1.17948	20.6881	46.8492
0	2000	0.0707	0.026615	0.0405618	0.373	0.923067	0.300899	1.22397	17.3132	107.261
100	2000	0.0717	0.0273261	0.0382814	0.373	0.938076	0.308939	1.24701	16.3399	124.466
200	2000	0.0713	0.0286831	0.0437748	0.373	0.930374	0.32428	1.25465	18.6846	69.0094
300	2000	0.0705	0.0272534	0.0333823	0.373	0.919276	0.308117	1.22739	14.2487	80.0923
400	2000	0.0702	0.0271353	0.0366509	0.373	0.914694	0.306782	1.22148	15.6439	73.9567
500	2000	0.0703	0.0269006	0.0359433	0.373	0.916499	0.304128	1.22063	15.3419	83.283
600	2000	0.0697	0.0267867	0.0414624	0.373	0.907223	0.302841	1.21006	17.6977	68.0946
700	2000	0.0691	0.0260634	0.0433139	0.373	0.89858	0.294664	1.19324	18.4879	68.6245
800	2000	0.0684	0.0257762	0.036037	0.373	0.887965	0.291416	1.17938	15.3819	56.9775
900	2000	0.0682	0.0238307	0.0355128	0.373	0.886774	0.269421	1.1562	15.1581	107.764
1000	2000	0.0674	0.0239892	0.041175	0.373	0.874195	0.271213	1.14541	17.5749	73.0356
1100	2000	0.0666	0.02361	0.0432533	0.373	0.862185	0.266926	1.12911	18.4621	60.3961
1200	2000	0.0672	0.0223493	0.0404087	0.373	0.872689	0.252673	1.12536	17.2479	128.262
1300	2000	0.0669	0.0229222	0.0332667	0.373	0.867486	0.259149	1.12664	14.1994	90.0937
1400	2000	0.0663	0.0234757	0.0411033	0.373	0.857683	0.265408	1.12309	17.5444	56.0109
1500	2000	0.0661	0.0229458	0.0401961	0.373	0.855106	0.259416	1.11452	17.1571	63.627
1600	2000	0.0668	0.0231496	0.038987	0.373	0.865719	0.261721	1.12744	16.6411	78.9098
1700	2000	0.066	0.0230963	0.0345136	0.373	0.853421	0.261118	1.11454	14.7316	57.3262
1800	2000	0.0661	0.0225297	0.0315744	0.373	0.855504	0.254713	1.11022	13.4771	75.4252
0	2100	0.071	0.0271429	0.0449695	0.373	0.927241	0.306868	1.23411	19.1946	101.053
100	2100	0.0709	0.0262564	0.0533522	0.373	0.926578	0.296845	1.22342	22.7726	130.736
200	2100	0.0707	0.0278605	0.0660327	0.373	0.921794	0.314981	1.23677	28.1851	70.9549
300	2100	0.0703	0.0260044	0.0400777	0.373	0.91741	0.293996	1.21141	17.1066	113.007
400	2100	0.0697	0.0252939	0.042764	0.373	0.908727	0.285964	1.19469	18.2532	114.526
500	2100	0.0695	0.0262429	0.0511292	0.373	0.904644	0.296693	1.20134	21.8238	75.7869
600	2100	0.0692	0.0255219	0.0423815	0.373	0.900682	0.288541	1.18922	18.09	86.581
700	2100	0.0687	0.0252416	0.0462384	0.373	0.893163	0.285372	1.17853	19.7362	78.2167
800	2100	0.0673	0.0238392	0.0449909	0.373	0.872791	0.269518	1.14231	19.2037	74.2201
900	2100	0.0662	0.0223865	0.0465712	0.373	0.857184	0.253093	1.11028	19.8783	83.4706
1000	2100	0.0661	0.0225528	0.0488251	0.373	0.855482	0.254974	1.11046	20.8403	74.7117
1100	2100	0.0656	0.0220365	0.045677	0.373	0.84827	0.249136	1.09741	19.4966	74.7836
1200	2100	0.0657	0.0218275	0.0506621	0.373	0.850008	0.246773	1.09678	21.6244	85.2479
1300	2100	0.0652	0.0218812	0.0449601	0.373	0.842265	0.247381	1.08965	19.1906	67.1954
1400	2100	0.0659	0.0213323	0.0334643	0.373	0.853561	0.241175	1.09474	14.2838	114.449
1500	2100	0.0653	0.0217695	0.0318763	0.373	0.843907	0.246117	1.09002	13.6059	73.6017
1600	2100	0.0651	0.0205751	0.0370718	0.373	0.841958	0.232614	1.07457	15.8236	113.641
1700	2100	0.0674	0.0207612	0.0430773	0.373	0.87734	0.234718	1.11206	18.3869	266.414
1800	2100	0.0667	0.0198168	0.043898	0.373	0.867386	0.224042	1.09143	18.7372	303.736
0	2200	0.0724	0.0249451	0.0594741	0.373	0.951628	0.282021	1.23365	25.3857	352.795
100	2200	0.0731	0.0263535	0.0672397	0.373	0.96126	0.297943	1.2592	28.7003	284.326
200	2200	0.0729	0.0260271	0.0624743	0.373	0.958427	0.294253	1.25268	26.6663	294.366
300	2200	0.0724	0.0249939	0.04744	0.373	0.951577	0.282572	1.23415	20.2491	347.063
400	2200	0.0722	0.0252302	0.0613073	0.373	0.94816	0.285243	1.2334	26.1681	298.647
500	2200	0.0719	0.026221	0.0611877	0.373	0.942381	0.296445	1.23883	26.1171	192.572
600	2200	0.0719	0.0241196	0.0596408	0.373	0.944565	0.272687	1.21725	25.4568	392.096
700	2200	0.0706	0.0232515	0.0582008	0.373	0.924929	0.262873	1.1878	24.8422	335.221
800	2200	0.0694	0.0230473	0.0431954	0.373	0.906288	0.260564	1.16685	18.4373	231.676
900	2200	0.0689	0.0220877	0.0475674	0.373	0.899421	0.249716	1.14914	20.3035	276.915
1000	2200	0.0685	0.0212337	0.0546315	0.373	0.894017	0.24006	1.13408	23.3187	334.005
1100	2200	0.069	0.0216991	0.0673594	0.373	0.901373	0.245322	1.14669	28.7514	334.71
1200	2200	0.0684	0.0220048	0.0668763	0.373	0.891693	0.248779	1.14047	28.5452	236.459
1300	2200	0.0686	0.0214331	0.0495678	0.373	0.895382	0.242314	1.1377	21.1573	320.176
1400	2200	0.068	0.0202458	0.0410068	0.373	0.887187	0.228891	1.11608	17.5032	415.127
1500	2200	0.0681	0.0200721	0.0438836	0.373	0.888918	0.226928	1.11585	18.7311	463.269
1600	2200	0.0676	0.0200265	0.0363163	0.373	0.881168	0.226412	1.10758	15.5011	391.8
1700	2200	0.0671	0.0199049	0.0461541	0.373	0.87351	0.225038	1.09855	19.7002	341.218
1800	2200	0.0659	0.019482	0.0455003	0.373	0.855324	0.220256	1.07558	19.4212	257.06
0	2300	0.0716	0.0239013	0.0504058	0.373	0.940043	0.27022	1.21026	21.515	380.506
100	2300	0.0725	0.0248734	0.0504193	0.373	0.953289	0.281209	1.2345	21.5207	374.32
200	2300	0.0722	0.0248524	0.0596879	0.373	0.948554	0.280972	1.22953	25.4769	339.192
300	2300	0.0723	0.0245197	0.0659074	0.373	0.950487	0.27721	1.2277	28.1316	393.329
400	2300	0.072	0.0245141	0.0622043	0.373	0.945738	0.277147	1.22289	26.551	354.582
500	2300	0.0714	0.0245432	0.0605477	0.373	0.936219	0.277477	1.2137	25.8439	283.133
600	2300	0.071	0.0245525	0.0707544	0.373	0.929899	0.277582	1.20748	30.2005	243.845
700	2300	0.0706	0.0230727	0.0544458	0.373	0.925111	0.260851	1.18596	23.2394	357.833
800	2300	0.0703	0.0213627	0.057272	0.373	0.922126	0.241518	1.16364	24.4457	610.133
900	2300	0.069	0.022624	0.0541055	0.373	0.900451	0.255778	1.15623	23.0942	233.751
1000	2300	0.0694	0.021419	0.0603705	0.373	0.907921	0.242155	1.15008	25.7683	432.84
1100	2300	0.0695	0.022152	0.064217	0.373	0.908754	0.250442	1.1592	27.4101	337.956
1200	2300	0.0693	0.0218729	0.0633733	0.373	0.905898	0.247287	1.15318	27.05	349.581
1300	2300	0.069	0.0218779	0.0543963	0.373	0.901195	0.247344	1.14854	23.2183	312.059
1400	2300	0.0679	0.0206732	0.0547065	0.373	0.885208	0.233723	1.11893	23.3507	334.744
1500	2300	0.0672	0.0202911	0.0548252	0.373	0.874689	0.229404	1.10409	23.4014	300.604
1600	2300	0.0669	0.019541	0.0527873	0.373	0.870756	0.220924	1.09168	22.5315	370.07
1700	2300	0.0666	0.0182478	0.0538606	0.373	0.867346	0.206303	1.07365	22.9896	588.454
1800	2300	0.0667	0.0191813	0.0450329	0.373	0.867999	0.216856	1.08486	19.2216	401.638
0	2400	0.0711	0.0233964	0.0437977	0.373	0.932664	0.264511	1.19717	18.6944	380.91
100	2400	0.071	0.0241939	0.0461154	0.373	0.930267	0.273528	1.2038	19.6837	276.608
200	2400	0.0713	0.0233154	0.057347	0.373	0.935906	0.263596	1.1995	24.4778	421.022
300	2400	0.0709	0.0235925	0.0632021	0.373	0.929308	0.266728	1.19604	26.9769	330.39
400	2400	0.0715	0.0243475	0.0752203	0.373	0.938001	0.275264	1.21326	32.1067	314.199
500	2400	0.0712	0.02399	0.0648803	0.373	0.933632	0.271222	1.20485	27.6933	319.649
600	2400	0.0711	0.0235397	0.0632379	0.373	0.932517	0.266131	1.19865	26.9922	361.848
700	2400	0.0707	0.0240811	0.0474913	0.373	0.925656	0.272252	1.19791	20.271	257.888
800	2400	0.0699	0.0223829	0.0479341	0.373	0.9148	0.253052	1.16785	20.46	358.52
900	2400	0.0697	0.0218236	0.0507097	0.373	0.912223	0.246729	1.15895	21.6447	412.566
1000	2400	0.0697	0.0222098	0.0489239	0.373	0.911834	0.251096	1.16293	20.8825	355.82
1100	2400	0.0703	0.0224147	0.0663262	0.373	0.921057	0.253413	1.17447	28.3104	409.583
1200	2400	0.0692	0.022739	0.0601237	0.373	0.903465	0.257079	1.16054	25.6629	241.356
1300	2400	0.0687	0.0204748	0.07077	0.373	0.897897	0.23148	1.12938	30.2072	489.067
1400	2400	0.0675	0.0209926	0.0653944	0.373	0.878669	0.237335	1.116	27.9127	251.53
1500	2400	0.0665	0.0194788	0.062321	0.373	0.864611	0.22022	1.08483	26.6008	325.955
1600	2400	0.0657	0.0186728	0.0602315	0.373	0.853004	0.211107	1.06411	25.709	343.174
1700	2400	0.066	0.0191508	0.0449856	0.373	0.857185	0.216512	1.0737	19.2015	310.419
1800	2400	0.0664	0.0190433	0.0463659	0.373	0.86348	0.215297	1.07878	19.7906	380.673
0	2500	0.0709	0.023199	0.0415153	0.373	0.929711	0.26228	1.19199	17.7202	380.735
100	2500	0.0709	0.0276327	0.0418545	0.373	0.925167	0.312405	1.23757	17.865	82.73
200	2500	0.0709	0.0264427	0.0404421	0.373	0.926387	0.298951	1.22534	17.2621	122.783
300	2500	0.0712	0.0270477	0.0533329	0.373	0.930485	0.305792	1.23628	22.7644	112.643
400	2500	0.0714	0.0271755	0.073808	0.373	0.933503	0.307236	1.24074	31.5039	116.618
500	2500	0.0715	0.0266194	0.0688621	0.373	0.935653	0.300949	1.2366	29.3928	145.438
600	2500	0.0708	0.0270688	0.0592828	0.373	0.924174	0.30603	1.2302	25.304	95.8177
700	2500	0.0704	0.0263227	0.0594344	0.373	0.918655	0.297594	1.21625	25.3687	105.367
800	2500	0.0709	0.0259638	0.0585522	0.373	0.926877	0.293538	1.22041	24.9922	144.354
900	2500	0.0705	0.0258082	0.051604	0.373	0.920749	0.291778	1.21253	22.0264	130.631
1000	2500	0.0697	0.0256416	0.0474111	0.373	0.908376	0.289895	1.19827	20.2367	101.302
1100	2500	0.0689	0.0255573	0.0570112	0.373	0.895966	0.288942	1.18491	24.3344	75.7232
1200	2500	0.0688	0.0241523	0.0703951	0.373	0.895805	0.273057	1.16886	30.0471	121.444
1300	2500	0.0683	0.0239114	0.0782029	0.373	0.888251	0.270333	1.15858	33.3798	108.824
1400	2500	0.0668	0.0229139	0.0658558	0.373	0.865947	0.259056	1.125	28.1096	86.699
1500	2500	0.0665	0.0213696	0.0722197	0.373	0.862794	0.241597	1.10439	30.8259	144.321
1600	2500	0.0662	0.0216197	0.0627255	0.373	0.857917	0.244425	1.10234	26.7735	114.824
1700	2500	0.0664	0.0227513	0.0583296	0.373	0.859921	0.257218	1.11714	24.8972	78.249
1800	2500	0.0669	0.0230759	0.050219	0.373	0.867338	0.260887	1.12823	21.4353	84.7357
0	2600	0.0711	0.0261793	0.0445956	0.373	0.929804	0.295973	1.22578	19.035	144.803
100	2600	0.071	0.0263017	0.0400101	0.373	0.928104	0.297358	1.22546	17.0777	133.767
200	2600	0.0709	0.0274285	0.0365775	0.373	0.925376	0.310096	1.23547	15.6126	88.4643
300	2600	0.0708	0.0260872	0.0476647	0.373	0.925178	0.294932	1.22011	20.345	133.247
400	2600	0.0712	0.0261696	0.0498984	0.373	0.931389	0.295864	1.22725	21.2984	150.877
500	2600	0.0713	0.0264467	0.0686445	0.373	0.932679	0.298997	1.23168	29.2999	142.814
600	2600	0.0709	0.0269271	0.061333	0.373	0.92589	0.304427	1.23032	26.1791	104.422
700	2600	0.0703	0.0256871	0.0527999	0.373	0.917732	0.290409	1.20814	22.5369	126.089
800	2600	0.0703	0.0260159	0.0467878	0.373	0.917398	0.294126	1.21152	19.9707	112.56
900	2600	0.0695	0.0244221	0.0480119	0.373	0.906473	0.276107	1.18258	20.4932	144.812
1000	2600	0.0689	0.0254397	0.0498893	0.373	0.896083	0.287612	1.18369	21.2945	78.9889
1100	2600	0.0687	0.0239779	0.0582018	0.373	0.894418	0.271086	1.1655	24.8426	124.549
1200	2600	0.0668	0.0231136	0.0531865	0.373	0.865754	0.261314	1.12707	22.7019	80.0497
1300	2600	0.067	0.0226426	0.0543686	0.373	0.869305	0.255988	1.12529	23.2065	105.035
1400	2600	0.0665	0.0227922	0.0565123	0.373	0.861427	0.25768	1.11911	24.1215	80.2838
1500	2600	0.0664	0.0214535	0.0846617	0.373	0.861167	0.242545	1.10371	36.1367	133.734
1600	2600	0.0665	0.0223521	0.0775357	0.373	0.86185	0.252705	1.11455	33.095	96.0291
1700	2600	0.0668	0.022863	0.07367	0.373	0.865996	0.258481	1.12448	31.445	88.4863
1800	2600	0.0664	0.022708	0.0611726	0.373	0.859963	0.256728	1.11669	26.1107	79.6384
0	2700	0.0713	0.0253283	0.0488921	0.373	0.933832	0.286352	1.22018	20.8689	208.294
100	2700	0.0706	0.0261372	0.051069	0.373	0.921984	0.295497	1.21748	21.7981	121.304
200	2700	0.0705	0.0266022	0.0436929	0.373	0.91994	0.300755	1.22069	18.6497	99.6486
300	2700	0.0707	0.0251006	0.0530822	0.373	0.924614	0.283779	1.20839	22.6574	180.085
400	2700	0.0705	0.0260141	0.0516903	0.373	0.920539	0.294106	1.21464	22.0633	121.719
500	2700	0.0706	0.0255182	0.0484113	0.373	0.922616	0.2885	1.21112	20.6637	150.008
600	2700	0.0704	0.0250506	0.0543951	0.373	0.919949	0.283213	1.20316	23.2178	163.578
700	2700	0.07	0.0246937	0.0585408	0.373	0.914033	0.279178	1.19321	24.9873	159.29
800	2700	0.0697	0.0253114	0.0476832	0.373	0.908709	0.286161	1.19487	20.3529	113.82
900	2700	0.0683	0.0237694	0.0691198	0.373	0.888391	0.268728	1.15712	29.5028	114.829
1000	2700	0.0682	0.0236551	0.0717439	0.373	0.886947	0.267435	1.15438	30.6229	115.207
1100	2700	0.0675	0.0226834	0.0707134	0.373	0.877019	0.256451	1.13347	30.183	126.737
1200	2700	0.0668	0.0229358	0.0697913	0.373	0.865926	0.259304	1.12523	29.7894	85.9425
1300	2700	0.0664	0.0215295	0.055888	0.373	0.861094	0.243405	1.1045	23.855	129.536
1400	2700	0.0668	0.0225081	0.0657458	0.373	0.866339	0.254468	1.12081	28.0627	102.094
1500	2700	0.0668	0.0222046	0.0790365	0.373	0.866632	0.251037	1.11767	33.7356	115.498
1600	2700	0.067	0.0229441	0.0834391	0.373	0.869013	0.259397	1.12841	35.6148	93.0979
1700	2700	0.0673	0.0226641	0.0856501	0.373	0.873934	0.256232	1.13017	36.5585	117.753
1800	2700	0.0672	0.0233621	0.0958665	0.373	0.871706	0.264123	1.13583	40.9193	85.7416
0	2800	0.0713	0.0256391	0.0449414	0.373	0.933511	0.289866	1.22338	19.1826	187.378
100	2800	0.0694	0.0253	0.0510111	0.373	0.904028	0.286032	1.19006	21.7733	101.508
200	2800	0.0695	0.0250208	0.0407582	0.373	0.905872	0.282876	1.18875	17.397	116.681
300	2800	0.0699	0.0247409	0.0510968	0.373	0.912417	0.279711	1.19213	21.81	150.722
400	2800	0.0699	0.0221613	0.058466	0.373	0.915024	0.250547	1.16557	24.9554	389.929
500	2800	0.0708	0.0232573	0.0717886	0.373	0.928074	0.262939	1.19101	30.6419	359.617
600	2800	0.0703	0.0225236	0.0604272	0.373	0.920947	0.254644	1.17559	25.7925	393.254
700	2800	0.07	0.0224432	0.0574554	0.373	0.91631	0.253735	1.17004	24.524	363.481
800	2800	0.0693	0.0216255	0.0583463	0.373	0.906146	0.24449	1.15064	24.9043	384.922
900	2800	0.068	0.0214939	0.0595012	0.373	0.88596	0.243002	1.12896	25.3973	248.631
1000	2800	0.0677	0.0202574	0.0551889	0.373	0.8825	0.229022	1.11152	23.5566	369.098
1100	2800	0.0672	0.0200478	0.0703068	0.373	0.874925	0.226653	1.10158	30.0095	333.464
1200	2800	0.0668	0.0196551	0.0627473	0.373	0.869094	0.222213	1.09131	26.7828	338.818
1300	2800	0.0668	0.0200328	0.0713979	0.373	0.868729	0.226483	1.09521	30.4752	287.542
1400	2800	0.0673	0.0211833	0.0693219	0.373	0.875375	0.239491	1.11487	29.5891	214.942
1500	2800	0.0676	0.0204884	0.060282	0.373	0.880717	0.231635	1.11235	25.7305	322.503
1600	2800	0.0685	0.0223123	0.0759414	0.373	0.892949	0.252254	1.1452	32.4145	217.757
1700	2800	0.0685	0.0217397	0.0885669	0.373	0.893516	0.245781	1.1393	37.8035	272.875
1800	2800	0.0692	0.0218715	0.0803046	0.373	0.904333	0.247271	1.1516	34.2769	337.057
0	2900	0.07	0.0234209	0.0416932	0.373	0.915321	0.264788	1.18011	17.7962	252.623
100	2900	0.0697	0.0213483	0.0611984	0.373	0.912702	0.241356	1.15406	26.1217	495.915
200	2900	0.0691	0.0222035	0.0613661	0.373	0.902435	0.251025	1.15346	26.1933	285.455
300	2900	0.0697	0.0226842	0.0562235	0.373	0.911356	0.256459	1.16781	23.9982	297.253
400	2900	0.0703	0.0222569	0.0541637	0.373	0.921218	0.251628	1.17285	23.119	434.551
500	2900	0.0712	0.0233561	0.070538	0.373	0.934284	0.264055	1.19834	30.1081	400.477
600	2900	0.071	0.0245699	0.0653699	0.373	0.929882	0.277778	1.20766	27.9022	242.369
700	2900	0.0708	0.0235075	0.0701023	0.373	0.927818	0.265768	1.19359	29.9222	328.527
800	2900	0.0695	0.0221384	0.0502991	0.373	0.908767	0.250289	1.15906	21.4695	339.723
900	2900	0.0689	0.0208731	0.0489424	0.373	0.900631	0.235983	1.13661	20.8904	447.822
1000	2900	0.0679	0.0202113	0.0504842	0.373	0.885661	0.228501	1.11416	21.5485	405.706
1100	2900	0.0675	0.0196445	0.0490248	0.373	0.879984	0.222093	1.10208	20.9255	444.129
1200	2900	0.0674	0.0201722	0.0678348	0.373	0.877913	0.228059	1.10597	28.9543	341.409
1300	2900	0.0678	0.0197281	0.0650522	0.373	0.884576	0.223038	1.10761	27.7666	479.261
1400	2900	0.0684	0.0213358	0.0668483	0.373	0.892355	0.241214	1.13357	28.5333	308.72
1500	2900	0.0689	0.0225171	0.051237	0.373	0.898994	0.25457	1.15356	21.8698	234.452
1600	2900	0.0702	0.023216	0.050675	0.373	0.918671	0.262472	1.18114	21.6299	293.375
1700	2900	0.0704	0.0241493	0.0419569	0.373	0.920867	0.273023	1.19389	17.9087	225.167
1800	2900	0.0707	0.0247003	0.0438591	0.373	0.925023	0.279253	1.20428	18.7207	207.145
0	3000	0.0694	0.0218404	0.0447806	0.373	0.907498	0.246919	1.15442	19.114	367.313
100	3000	0.0694	0.0223385	0.0487318	0.373	0.906999	0.252551	1.15955	20.8005	303.187
200	3000	0.0698	0.0225939	0.0491973	0.373	0.913016	0.255438	1.16845	20.9992	319.139
300	3000	0.0706	0.0226063	0.0464207	0.373	0.925587	0.255578	1.18117	19.814	424.781
400	3000	0.0713	0.0232676	0.0549153	0.373	0.935955	0.263055	1.19901	23.4398	428.287
500	3000	0.0715	0.0246243	0.0622288	0.373	0.937715	0.278394	1.21611	26.5615	285.442
600	3000	0.0725	0.0249864	0.0615179	0.373	0.953171	0.282487	1.23566	26.258	360.393
700	3000	0.0711	0.0246756	0.0602374	0.373	0.931349	0.278973	1.21032	25.7115	242.346
800	3000	0.0707	0.0237383	0.056364	0.373	0.926007	0.268376	1.19438	24.0582	291.544
900	3000	0.0693	0.0220587	0.0573314	0.373	0.905712	0.249387	1.1551	24.4711	325.312
1000	3000	0.0691	0.0214188	0.0533394	0.373	0.903219	0.242152	1.14537	22.7672	387.849
1100	3000	0.0686	0.0225642	0.0413004	0.373	0.894261	0.255103	1.14936	17.6285	205.168
1200	3000	0.0676	0.0216188	0.0521392	0.373	0.879612	0.244414	1.12403	22.2549	202.272
1300	3000	0.0671	0.0213326	0.0371279	0.373	0.872125	0.241179	1.1133	15.8475	186.667
1400	3000	0.0673	0.0219258	0.04097	0.373	0.874652	0.247884	1.12254	17.4875	158.503
1500	3000	0.0683	0.0235395	0.0398921	0.373	0.888618	0.266129	1.15475	17.0274	125.317
1600	3000	0.0705	0.0248854	0.0442908	0.373	0.921689	0.281345	1.20303	18.9049	180.054
1700	3000	0.0714	0.0258418	0.0354498	0.373	0.934879	0.292157	1.22704	15.1312	181.603
1800	3000	0.0714	0.0253078	0.0466786	0.373	0.93543	0.28612	1.22155	19.9241	217.648
0	3100	0.0698	0.0222983	0.0495563	0.373	0.913314	0.252097	1.16541	21.1524	356.883
100	3100	0.0699	0.0220593	0.0392108	0.373	0.915127	0.249395	1.16452	16.7366	405.346
200	3100	0.0703	0.0231512	0.0388928	0.373	0.920309	0.261739	1.18205	16.6008	311.698
300	3100	0.0711	0.0241159	0.0449223	0.373	0.931925	0.272646	1.20457	19.1745	294.879
400	3100	0.0716	0.0244745	0.0485407	0.373	0.93945	0.2767	1.21615	20.7189	311.659
500	3100	0.0727	0.0252237	0.0537338	0.373	0.956096	0.285169	1.24127	22.9355	357.16
600	3100	0.0732	0.0265675	0.0589295	0.373	0.962623	0.300363	1.26299	25.1532	275.064
700	3100	0.0721	0.0263508	0.056932	0.373	0.945408	0.297912	1.24332	24.3006	198.583
800	3100	0.0716	0.0269281	0.0533848	0.373	0.936911	0.304439	1.24135	22.7865	136.438
900	3100	0.0705	0.025456	0.0518359	0.373	0.921108	0.287796	1.2089	22.1254	147.531
1000	3100	0.0691	0.0248429	0.0562141	0.373	0.899799	0.280864	1.18066	23.9942	106.192
1100	3100	0.067	0.0246179	0.0532905	0.373	0.867392	0.278321	1.14571	22.7463	48.451
1200	3100	0.0635	0.0233493	0.0452942	0.373	0.814907	0.263978	1.07888	19.3332	16.5326
1300	3100	0.0617	0.0230495	0.0425283	0.373	0.787907	0.260589	1.0485	18.1526	7.74212
1400	3100	0.0602	0.0230529	0.0397502	0.373	0.765361	0.260628	1.02599	16.9668	3.51785
1500	3100	0.0623	0.0240598	0.0349881	0.373	0.796062	0.272012	1.06807	14.9342	6.75365
1600	3100	0.0666	0.025893	0.0368494	0.373	0.859987	0.292736	1.15272	15.7286	25.1246
1700	3100	0.0692	0.0267903	0.0341128	0.373	0.899413	0.302881	1.20229	14.5606	55.4642
1800	3100	0.0701	0.0265593	0.0435877	0.373	0.913711	0.30027	1.21398	18.6048	86.3769
0	3200	0.0706	0.0245906	0.0403951	0.373	0.923562	0.278012	1.20157	17.2421	207.405
100	3200	0.0704	0.0244024	0.0384021	0.373	0.920609	0.275885	1.19649	16.3914	205.701
200	3200	0.0704	0.02459	0.0471871	0.373	0.920418	0.278005	1.19842	20.1411	192.439
300	3200	0.0715	0.0260145	0.0373667	0.373	0.936278	0.29411	1.23039	15.9495	177.865
400	3200	0.0718	0.0257925	0.0415094	0.373	0.941245	0.291601	1.23285	17.7177	214.041
500	3200	0.0728	0.0266989	0.0444748	0.373	0.956132	0.301848	1.25798	18.9834	228.698
600	3200	0.073	0.0280446	0.0432943	0.373	0.957887	0.317062	1.27495	18.4796	160.848
700	3200	0.0733	0.0285089	0.0468162	0.373	0.962157	0.322311	1.28447	19.9828	155.593
800	3200	0.072	0.0280899	0.0354678	0.373	0.942017	0.317574	1.25959	15.1389	109.201
900	3200	0.0695	0.0261756	0.0459123	0.373	0.904712	0.295932	1.20064	19.597	77.5846
1000	3200	0.0664	0.0260512	0.0323502	0.373	0.856754	0.294525	1.15128	13.8082	21.6514
1100	3200	0.0618	0.0254936	0.0306852	0.373	0.787233	0.288221	1.07545	13.0975	2.84275
1200	3200	0.0552	0.0234121	0.0388261	0.373	0.691151	0.264688	0.955839	16.5723	0.149794
1300	3200	0.0488	0.0229371	0.039416	0.373	0.599635	0.259318	0.858953	16.8242	0.00170817
1400	3200	0.0482	0.0214787	0.0334682	0.373	0.592193	0.24283	0.835024	14.2854	0.00248098
1500	3200	0.0495	0.0217165	0.0326254	0.373	0.61041	0.245519	0.855929	13.9257	0.0061713
1600	3200	0.0552	0.0222992	0.0443748	0.373	0.692039	0.252106	0.944145	18.9407	0.265223
1700	3200	0.0619	0.024198	0.0449412	0.373	0.789898	0.273574	1.06347	19.1825	5.18561
1800	3200	0.0661	0.0253391	0.0494012	0.373	0.85282	0.286475	1.13929	21.0862	24.7571
0	3300	0.0722	0.0265572	0.0479261	0.373	0.946775	0.300246	1.24702	20.4566	192.551
100	3300	0.0716	0.0262213	0.0528934	0.373	0.937642	0.296449	1.23409	22.5768	172.297
200	3300	0.0724	0.0266538	0.0493538	0.373	0.949839	0.301338	1.25118	21.066	200.762
300	3300	0.072	0.0269162	0.0494124	0.373	0.943238	0.304305	1.24754	21.091	159.123
400	3300	0.0723	0.0272335	0.0450485	0.373	0.94765	0.307892	1.25554	19.2283	160.55
500	3300	0.0728	0.0277418	0.0428349	0.373	0.955035	0.313639	1.26867	18.2835	164.29
600	3300	0.0719	0.0283285	0.037942	0.373	0.940191	0.320271	1.26046	16.195	97.4745
700	3300	0.071	0.0285581	0.036496	0.373	0.925789	0.322868	1.24866	15.5778	63.7761
800	3300	0.0674	0.027817	0.0339397	0.373	0.870466	0.314488	1.18495	14.4867	17.904
900	3300	0.0623	0.0266896	0.0354985	0.373	0.793694	0.301743	1.09544	15.152	2.27365
1000	3300	0.0562	0.0261818	0.0307578	0.373	0.703531	0.296001	0.999532	13.1285	0.07643
1100	3300	0.0504	0.0246913	0.0337711	0.373	0.621043	0.27915	0.900193	14.4147	0.0023663
1200	3300	0.0441	0.0222735	0.0430552	0.373	0.53453	0.251816	0.786345	18.3775	3.72976e-05
1300	3300	0.0377	0.0216335	0.0334102	0.373	0.448252	0.24458	0.692833	14.2607	5.31567e-08
1400	3300	0.0358	0.0206918	0.0305627	0.373	0.423597	0.233934	0.65753	13.0453	1.00725e-08
1500	3300	0.0367	0.0193306	0.0411752	0.373	0.436207	0.218545	0.654752	17.5751	9.32379e-08
1600	3300	0.0413	0.0208083	0.0416587	0.373	0.497127	0.235251	0.732378	17.7814	5.8347e-06
1700	3300	0.0487	0.023183	0.0447974	0.373	0.59805	0.262098	0.860149	19.1211	0.00136361
1800	3300	0.0564	0.0232969	0.0716503	0.373	0.70881	0.263386	0.972196	30.5829	0.342572
0	3400	0.0736	0.0281875	0.0583651	0.373	0.967265	0.318678	1.28594	24.9123	191.338
100	3400	0.0737	0.028843	0.0421988	0.373	0.968157	0.326088	1.29425	18.012	162.626
200	3400	0.0733	0.0294225	0.0396345	0.373	0.961189	0.332639	1.29383	16.9174	118.024
300	3400	0.0734	0.0289615	0.0498076	0.373	0.963264	0.327428	1.29069	21.2597	140.669
400	3400	0.0725	0.0284798	0.0393423	0.373	0.94951	0.321982	1.27149	16.7927	116.726
500	3400	0.0693	0.0284479	0.0347097	0.373	0.899312	0.321622	1.22093	14.8153	32.9554
600	3400	0.0654	0.0274297	0.0401568	0.373	0.840094	0.31011	1.1502	17.1404	8.1557
700	3400	0.0617	0.0276883	0.0312346	0.373	0.78377	0.313033	1.0968	13.3321	1.10576
800	3400	0.0551	0.0266576	0.034936	0.373	0.687108	0.301381	0.988488	14.9119	0.0292658
900	3400	0.0465	0.026021	0.0303027	0.373	0.565288	0.294184	0.859472	12.9343	3.93668e-05
1000	3400	0.0391	0.0249506	0.0328327	0.373	0.465077	0.282082	0.74716	14.0142	2.88977e-08
1100	3400	0.033	0.0244753	0.0419244	0.373	0.385195	0.276708	0.661903	17.8948	1.18246e-11
1200	3400	0.0279	0.0235363	0.0361706	0.373	0.320705	0.266092	0.586797	15.4389	6.73641e-15
1300	3400	0.0239	0.0218587	0.0328707	0.373	0.271718	0.247126	0.518844	14.0304	1.53574e-17
1400	3400	0.0218	0.0203629	0.0365618	0.373	0.246597	0.230216	0.476813	15.6059	7.19391e-19
1500	3400	0.0237	0.0204877	0.0446524	0.373	0.269736	0.231626	0.501362	19.0592	3.7177e-17
1600	3400	0.0299	0.0210501	0.0519628	0.373	0.347012	0.237985	0.584997	22.1796	1.56139e-12
1700	3400	0.0356	0.020968	0.0543464	0.373	0.420821	0.237056	0.657877	23.197	6.25614e-09
1800	3400	0.0429	0.0215405	0.0573923	0.373	0.518508	0.243529	0.762037	24.4971	1.83934e-05
0	3500	0.0736	0.0311453	0.054741	0.373	0.964118	0.352118	1.31624	23.3654	79.6297
100	3500	0.0741	0.0310418	0.0391713	0.373	0.972169	0.350947	1.32312	16.7197	98.8884
200	3500	0.0743	0.0325248	0.053223	0.373	0.973758	0.367714	1.34147	22.7175	70.2809
300	3500	0.0734	0.0323386	0.0506488	0.373	0.959681	0.365608	1.32529	21.6187	52.5107
400	3500	0.0695	0.0307747	0.054729	0.373	0.900092	0.347927	1.24802	23.3603	16.9087
500	3500	0.0606	0.0289301	0.0488414	0.373	0.766208	0.327073	1.09328	20.8472	0.364173
600	3500	0.0503	0.0273122	0.0424119	0.373	0.617716	0.308782	0.926498	18.1029	0.000566186
700	3500	0.0392	0.0261378	0.0350752	0.373	0.465741	0.295505	0.761246	14.9714	1.52137e-08
800	3500	0.0289	0.0255744	0.0351572	0.373	0.332432	0.289135	0.621568	15.0064	7.42453e-15
900	3500	0.0232	0.0257181	0.0400673	0.373	0.261856	0.290759	0.552616	17.1022	1.11912e-19
1000	3500	0.0199	0.024344	0.0284956	0.373	0.222541	0.275224	0.497765	12.1629	1.69873e-22
1100	3500	0.0189	0.0246625	0.0223769	0.373	0.210562	0.278826	0.489387	9.55126	9.07451e-24
1200	3500	0.0169	0.022735	0.0255671	0.373	0.187483	0.257033	0.444516	10.9129	1.67095e-25
1300	3500	0.0148	0.0228042	0.0291156	0.373	0.163005	0.257816	0.420821	12.4276	1.08473e-28
1400	3500	0.0124	0.0214082	0.0303954	0.373	0.135706	0.242033	0.377739	12.9739	8.73658e-33
1500	3500	0.012	0.0199344	0.0376465	0.373	0.131404	0.225371	0.356775	16.0689	3.31784e-33
1600	3500	0.0164	0.0194003	0.0436366	0.373	0.182419	0.219333	0.401751	18.6257	8.99619e-25
1700	3500	0.0218	0.0200453	0.0322799	0.373	0.246697	0.226625	0.473322	13.7782	9.85776e-19
1800	3500	0.0287	0.0200134	0.046107	0.373	0.332223	0.226264	0.558487	19.6801	5.54821e-13

## Sheet: P2BN
X (microns)	Y (microns)	A4520 (OH)	A5230 (H2Om)	A2350 (CO2)	thickness (mm)	[OH] wt%	[H2Om] wt%	[H2Ot] wt%	[CO2] ppm	Q (K/s)
0	0	0.0987824	0.0724561	0.0970488	0.418	1.16011	0.730974	1.89108	36.9644	21.0275
100	0	0.0992679	0.0721043	0.0918183	0.418	1.16765	0.727426	1.89507	34.9722	25.2898
200	0	0.0993332	0.0723619	0.108575	0.418	1.16832	0.730025	1.89834	41.3544	24.997
300	0	0.098869	0.0754475	0.111449	0.418	1.15797	0.761153	1.91913	42.4491	15.1698
400	0	0.0997177	0.0739109	0.131195	0.418	1.17221	0.745651	1.91786	49.9702	23.3059
500	0	0.0992922	0.0753453	0.130752	0.418	1.1643	0.760123	1.92443	49.8014	17.4179
600	0	0.10004	0.0723315	0.106091	0.418	1.17878	0.729718	1.9085	40.4083	30.7705
700	0	0.100081	0.073914	0.0972336	0.418	1.17756	0.745683	1.92324	37.0348	25.883
800	0	0.100131	0.0727789	0.10126	0.418	1.17961	0.734231	1.91384	38.5685	29.9689
900	0	0.100289	0.0712886	0.110446	0.418	1.18366	0.719196	1.90285	42.067	37.3478
1000	0	0.100304	0.0745926	0.148199	0.418	1.18006	0.752528	1.93259	56.4466	25.5267
1100	0	0.0994199	0.0771911	0.165172	0.418	1.16407	0.778744	1.94281	62.9115	14.6557
1200	0	0.0999991	0.0806305	0.174376	0.418	1.16862	0.813442	1.98206	66.4171	11.9158
1300	0	0.0993754	0.0776163	0.143213	0.418	1.16293	0.783033	1.94596	54.5475	13.7847
1400	0	0.100079	0.0775228	0.098589	0.418	1.17337	0.78209	1.95546	37.551	17.1701
1500	0	0.100782	0.0758488	0.0818425	0.418	1.18567	0.765201	1.95087	31.1726	25.3977
1600	0	0.0995648	0.0744653	0.0612578	0.418	1.16932	0.751245	1.92056	23.3321	20.8981
1700	0	0.100575	0.076373	0.0677351	0.418	1.182	0.77049	1.95249	25.7993	22.5624
1800	0	0.10161	0.0778701	0.117506	0.418	1.19557	0.785594	1.98116	44.7563	25.729
1900	0	0.10269	0.0828601	0.145046	0.418	1.20569	0.835935	2.04163	55.2457	20.6698
2000	0	0.101735	0.0789274	0.150982	0.418	1.19617	0.79626	1.99243	57.5067	23.7786
2100	0	0.101197	0.0891554	0.149084	0.418	1.17631	0.899446	2.07576	56.7838	7.10035
2200	0	0.0998004	0.0972639	0.136736	0.418	1.1466	0.981249	2.12785	52.0807	2.10519
2300	0	0.102506	0.0853403	0.116516	0.418	1.20004	0.860957	2.061	44.379	15.2653
2400	0	0.101769	0.0813127	0.0722909	0.418	1.19388	0.820324	2.0142	27.5345	18.6401
2500	0	0.101938	0.0808295	0.119364	0.418	1.19695	0.81545	2.0124	45.4638	20.5863
2600	0	0.101718	0.083154	0.117739	0.418	1.19097	0.8389	2.02987	44.8452	15.1667
2700	0	0.101234	0.081524	0.104234	0.418	1.18574	0.822456	2.0082	39.7009	15.6099
2800	0	0.10106	0.0827692	0.102917	0.418	1.18174	0.835018	2.01676	39.1995	13.0179
0	100	0.0978066	0.0685849	0.0888635	0.418	1.15015	0.69192	1.84207	33.8467	25.3614
100	100	0.100062	0.0694101	0.106835	0.418	1.18247	0.700245	1.88272	40.6918	43.8879
200	100	0.0996413	0.0726638	0.0959273	0.418	1.17251	0.73307	1.90558	36.5372	26.3787
300	100	0.0993636	0.0735792	0.113509	0.418	1.16737	0.742305	1.90968	43.2337	21.8445
400	100	0.0993823	0.0753134	0.12468	0.418	1.16566	0.7598	1.92546	47.4886	17.9555
500	100	0.101113	0.0742323	0.138839	0.418	1.19244	0.748894	1.94134	52.8816	33.4872
600	100	0.100324	0.0723677	0.15566	0.418	1.18293	0.730082	1.91301	59.2883	33.2193
700	100	0.098795	0.0744567	0.146443	0.418	1.15802	0.751157	1.90917	55.7779	16.6534
800	100	0.0993275	0.0722366	0.118567	0.418	1.16838	0.72876	1.89714	45.1604	25.3306
900	100	0.100542	0.0735328	0.0945309	0.418	1.1848	0.741836	1.92664	36.0054	30.8642
1000	100	0.0997125	0.0748218	0.103999	0.418	1.17108	0.754841	1.92593	39.6116	20.9421
1100	100	0.100655	0.0736788	0.146184	0.418	1.18632	0.743309	1.92963	55.6794	31.3488
1200	100	0.10049	0.0771171	0.150921	0.418	1.1799	0.777997	1.9579	57.4834	20.2629
1300	100	0.101515	0.0780349	0.101226	0.418	1.19396	0.787256	1.98122	38.5554	24.5968
1400	100	0.10198	0.0798876	0.0887294	0.418	1.19868	0.805947	2.00462	33.7957	23.0124
1500	100	0.100763	0.0780415	0.107972	0.418	1.18285	0.787323	1.97017	41.125	19.8014
1600	100	0.100971	0.0788717	0.0854856	0.418	1.18495	0.795698	1.98065	32.5602	19.2088
1700	100	0.101795	0.078145	0.100275	0.418	1.19798	0.788367	1.98635	38.1933	26.3166
1800	100	0.102172	0.0819572	0.145097	0.418	1.19909	0.826827	2.02591	55.2651	19.5674
1900	100	0.103391	0.0823005	0.127909	0.418	1.21675	0.83029	2.04704	48.7184	26.6366
2000	100	0.102646	0.0820252	0.131936	0.418	1.20602	0.827513	2.03353	50.2525	22.2331
2100	100	0.103066	0.0895137	0.122971	0.418	1.20337	0.903061	2.10643	46.8378	11.9442
2200	100	0.102719	0.0894175	0.131162	0.418	1.19837	0.90209	2.10046	49.9576	10.8964
2300	100	0.100857	0.0831094	0.128812	0.418	1.17835	0.83845	2.0168	49.0626	11.828
2400	100	0.101415	0.0808031	0.0961028	0.418	1.18925	0.815183	2.00443	36.6041	17.7575
2500	100	0.102623	0.0849518	0.117953	0.418	1.20222	0.857037	2.05926	44.9263	16.4126
2600	100	0.102079	0.0834165	0.126627	0.418	1.196	0.841549	2.03755	48.2302	16.3939
2700	100	0.101003	0.0826601	0.107833	0.418	1.18102	0.833918	2.01494	41.072	12.9447
2800	100	0.101617	0.0822796	0.101431	0.418	1.19051	0.830079	2.02059	38.6337	16.1243
0	200	0.0991839	0.0739979	0.0595545	0.418	1.16425	0.746529	1.91078	22.6834	19.7269
100	200	0.0983645	0.0740288	0.092178	0.418	1.15219	0.746841	1.89903	35.1092	15.3892
200	200	0.10143	0.0759736	0.0934453	0.418	1.19512	0.766461	1.96158	35.5919	30.1155
300	200	0.100525	0.0780871	0.0878035	0.418	1.17928	0.787784	1.96706	33.443	18.3805
400	200	0.102428	0.079367	0.0967914	0.418	1.20593	0.800696	2.00662	36.8663	27.5952
500	200	0.102898	0.0797372	0.105356	0.418	1.21247	0.80443	2.0169	40.1283	30.2558
600	200	0.102394	0.0791951	0.12568	0.418	1.20563	0.798961	2.00459	47.8696	27.8384
700	200	0.102024	0.0807988	0.121302	0.418	1.19826	0.81514	2.0134	46.2021	21.1665
800	200	0.101673	0.0809194	0.127033	0.418	1.19293	0.816357	2.00928	48.3849	18.8989
900	200	0.101686	0.0809274	0.121282	0.418	1.19311	0.816437	2.00955	46.1943	18.9534
1000	200	0.100834	0.0814041	0.0912667	0.418	1.18	0.821247	2.00125	34.7621	14.061
1100	200	0.103382	0.0810803	0.151288	0.418	1.21807	0.81798	2.03605	57.6234	30.0949
1200	200	0.103005	0.0815601	0.187788	0.418	1.21189	0.822821	2.03471	71.5254	25.7961
1300	200	0.103554	0.0849487	0.128679	0.418	1.21602	0.857006	2.07303	49.0117	21.3861
1400	200	0.102631	0.0852973	0.103199	0.418	1.20194	0.860524	2.06246	39.307	15.8942
1500	200	0.103823	0.0863147	0.118785	0.418	1.21837	0.870787	2.08916	45.2432	20.169
1600	200	0.103527	0.0862639	0.117421	0.418	1.21406	0.870275	2.08433	44.7238	18.6527
1700	200	0.103245	0.0866205	0.120827	0.418	1.20945	0.873872	2.08333	46.021	16.6287
1800	200	0.102696	0.0879626	0.154383	0.418	1.19975	0.887412	2.08716	58.8019	12.4561
1900	200	0.102021	0.08895	0.143851	0.418	1.18864	0.897374	2.08602	54.7908	9.27818
2000	200	0.10319	0.0910131	0.167732	0.418	1.20342	0.918187	2.12161	63.8864	10.7451
2100	200	0.103371	0.0898741	0.121882	0.418	1.20744	0.906697	2.11414	46.423	12.6067
2200	200	0.10365	0.0899714	0.0993824	0.418	1.21145	0.907678	2.11912	37.8532	13.5352
2300	200	0.104625	0.0872203	0.104442	0.418	1.2292	0.879924	2.10912	39.7803	23.1094
2400	200	0.103363	0.0877657	0.079258	0.418	1.20983	0.885426	2.09526	30.1882	15.3875
2500	200	0.103538	0.0874411	0.0947361	0.418	1.21281	0.882152	2.09496	36.0835	16.6869
2600	200	0.103741	0.0911468	0.140701	0.418	1.21139	0.919536	2.13092	53.5906	12.4455
2700	200	0.0963046	0.08939	0.166341	0.418	1.10511	0.901812	2.00692	63.3569	1.4249
2800	200	0.10023	0.0876602	0.125566	0.418	1.1639	0.884361	2.04826	47.8263	6.12763
0	300	0.100308	0.0752226	0.0639441	0.418	1.1794	0.758885	1.93829	24.3553	23.7867
100	300	0.0991125	0.0760084	0.0684753	0.418	1.16091	0.766812	1.92772	26.0812	15.296
200	300	0.10067	0.0758055	0.099328	0.418	1.18407	0.764765	1.94883	37.8325	24.7143
300	300	0.100578	0.0775033	0.106124	0.418	1.18075	0.781894	1.96264	40.4211	19.9131
400	300	0.1003	0.0789828	0.103949	0.418	1.17494	0.79682	1.97176	39.5926	15.5948
500	300	0.101579	0.0789773	0.115671	0.418	1.19381	0.796764	1.99058	44.0574	22.6237
600	300	0.102383	0.0829785	0.127575	0.418	1.201	0.83713	2.03813	48.5912	18.7074
700	300	0.10261	0.0845143	0.123244	0.418	1.20255	0.852624	2.05517	46.9417	17.0865
800	300	0.102148	0.0825279	0.121865	0.418	1.19806	0.832584	2.03064	46.4163	18.3191
900	300	0.101417	0.0809059	0.123903	0.418	1.18917	0.81622	2.00539	47.1926	17.5796
1000	300	0.101799	0.0825825	0.11815	0.418	1.19284	0.833135	2.02597	45.0016	16.4724
1100	300	0.101641	0.0818497	0.136806	0.418	1.19136	0.825742	2.01711	52.1073	16.9818
1200	300	0.101051	0.0825583	0.171521	0.418	1.18184	0.83289	2.01473	65.3295	13.2703
1300	300	0.10223	0.0863219	0.170504	0.418	1.19481	0.87086	2.06567	64.9422	12.7774
1400	300	0.102901	0.0832014	0.15428	0.418	1.20841	0.839379	2.04779	58.7629	21.1925
1500	300	0.103372	0.0858143	0.121009	0.418	1.21229	0.865739	2.07803	46.0905	18.6544
1600	300	0.10403	0.0855021	0.110457	0.418	1.22243	0.86259	2.08502	42.0713	23.1337
1700	300	0.103209	0.0860434	0.0984546	0.418	1.2096	0.86805	2.07765	37.4998	17.4145
1800	300	0.104352	0.0877903	0.112528	0.418	1.22447	0.885673	2.11014	42.86	20.2953
1900	300	0.103037	0.089322	0.147357	0.418	1.20316	0.901126	2.10429	56.1261	12.0622
2000	300	0.102675	0.0868464	0.17292	0.418	1.20075	0.876151	2.0769	65.8625	13.8055
2100	300	0.104398	0.090139	0.128332	0.418	1.22232	0.909369	2.13169	48.8799	16.4794
2200	300	0.102964	0.0868428	0.11048	0.418	1.20503	0.876115	2.08115	42.08	15.014
2300	300	0.103452	0.0865158	0.0891841	0.418	1.21263	0.872816	2.08545	33.9688	17.8138
2400	300	0.103784	0.0865498	0.0919717	0.418	1.21752	0.873159	2.09068	35.0306	19.5018
2500	300	0.103184	0.0875168	0.0854111	0.418	1.20748	0.882915	2.09039	32.5318	14.9732
2600	300	0.102722	0.0871927	0.134748	0.418	1.20104	0.879645	2.08069	51.3236	13.5296
2700	300	0.102715	0.0863985	0.177057	0.418	1.20188	0.871633	2.07351	67.4381	14.5977
2800	300	0.102665	0.0943573	0.120808	0.418	1.19173	0.951925	2.14366	46.0141	6.74416
0	400	0.100871	0.0796114	0.0721398	0.418	1.18262	0.803161	1.98578	27.4769	17.2221
100	400	0.099642	0.0785844	0.0795412	0.418	1.16573	0.7928	1.95853	30.296	13.3997
200	400	0.0997077	0.0777321	0.104032	0.418	1.16767	0.784201	1.95187	39.6241	15.0272
300	400	0.0996025	0.0779161	0.117031	0.418	1.16592	0.786058	1.95198	44.5752	14.2665
400	400	0.10027	0.0792254	0.0912315	0.418	1.17422	0.799267	1.97349	34.7487	15.0516
500	400	0.0999755	0.0794641	0.106823	0.418	1.16962	0.801675	1.97129	40.6872	13.4351
600	400	0.100825	0.0812094	0.114472	0.418	1.18009	0.819283	1.99937	43.6007	14.3154
700	400	0.101217	0.0815067	0.14024	0.418	1.18551	0.822282	2.00779	53.4154	15.5609
800	400	0.102051	0.0828596	0.15125	0.418	1.19624	0.835931	2.03217	57.6086	17.218
900	400	0.10359	0.0837651	0.133892	0.418	1.21796	0.845066	2.06303	50.9974	24.2936
1000	400	0.102293	0.0829589	0.134037	0.418	1.1997	0.836932	2.03663	51.0524	18.2725
1100	400	0.102623	0.0830432	0.13889	0.418	1.20448	0.837782	2.04226	52.901	19.903
1200	400	0.102123	0.084492	0.138899	0.418	1.19538	0.852399	2.04778	52.9043	14.8813
1300	400	0.103723	0.0853004	0.13729	0.418	1.2181	0.860555	2.07866	52.2918	21.6562
1400	400	0.1021	0.0849512	0.149239	0.418	1.1945	0.857031	2.05153	56.8428	14.1112
1500	400	0.103318	0.0849491	0.133025	0.418	1.21251	0.85701	2.06952	50.6674	20.0071
1600	400	0.103151	0.084807	0.118533	0.418	1.21021	0.855577	2.06578	45.1475	19.3564
1700	400	0.102345	0.0862222	0.0985857	0.418	1.19662	0.869854	2.06647	37.5498	13.3429
1800	400	0.10306	0.0863493	0.0883085	0.418	1.20704	0.871136	2.07817	33.6354	16.1969
1900	400	0.104136	0.0868475	0.108328	0.418	1.22238	0.876163	2.09854	41.2607	20.9079
2000	400	0.104509	0.0887868	0.145763	0.418	1.22559	0.895727	2.12132	55.5189	19.2931
2100	400	0.103927	0.0881772	0.171749	0.418	1.21769	0.889577	2.10727	65.4164	17.3607
2200	400	0.103289	0.0886309	0.14492	0.418	1.20771	0.894154	2.10186	55.1978	13.8608
2300	400	0.102733	0.0870181	0.103779	0.418	1.2014	0.877883	2.07929	39.5278	13.8049
2400	400	0.102726	0.0882396	0.0891665	0.418	1.19986	0.890207	2.09006	33.9621	12.2301
2500	400	0.103286	0.0873464	0.0947285	0.418	1.20919	0.881195	2.09038	36.0806	15.6732
2600	400	0.103364	0.0871449	0.110916	0.418	1.21059	0.879163	2.08975	42.246	16.3445
2700	400	0.103743	0.0867183	0.141558	0.418	1.21671	0.87486	2.09157	53.9173	18.9662
2800	400	0.103728	0.0872409	0.0887962	0.418	1.21586	0.880131	2.09599	33.8211	17.9547
0	500	0.102545	0.0843655	0.0941143	0.418	1.20176	0.851123	2.05288	35.8467	17.022
100	500	0.102168	0.0817857	0.114167	0.418	1.19923	0.825096	2.02433	43.4844	19.8965
200	500	0.100399	0.0806745	0.113144	0.418	1.17445	0.813886	1.98833	43.095	13.3646
300	500	0.100268	0.0800193	0.082674	0.418	1.17327	0.807276	1.98055	31.4892	13.7958
400	500	0.100706	0.0783997	0.0782993	0.418	1.18159	0.790936	1.97253	29.823	18.7244
500	500	0.100253	0.0797778	0.0887769	0.418	1.17334	0.80484	1.97818	33.8137	14.1013
600	500	0.101446	0.0801578	0.0971539	0.418	1.19046	0.808673	1.99914	37.0044	19.1896
700	500	0.101081	0.0833525	0.10339	0.418	1.18136	0.840903	2.02226	39.3796	12.323
800	500	0.102126	0.082434	0.122299	0.418	1.19784	0.831637	2.02948	46.5818	18.3814
900	500	0.102371	0.0842398	0.133253	0.418	1.19935	0.849854	2.0492	50.754	16.4016
1000	500	0.101665	0.0835254	0.143693	0.418	1.18977	0.842647	2.03241	54.7306	14.3762
1100	500	0.102845	0.0835828	0.158316	0.418	1.20713	0.843226	2.05036	60.3002	20.0688
1200	500	0.100713	0.088287	0.167774	0.418	1.17024	0.890685	2.06092	63.9025	6.67634
1300	500	0.102773	0.0843759	0.151736	0.418	1.20512	0.851227	2.05635	57.7939	18.1507
1400	500	0.102111	0.0845139	0.161278	0.418	1.19519	0.85262	2.04781	61.4281	14.7989
1500	500	0.103888	0.0839575	0.12712	0.418	1.22217	0.847007	2.06917	48.4181	25.8916
1600	500	0.102083	0.0853611	0.105108	0.418	1.19378	0.861166	2.05494	40.0339	13.4759
1700	500	0.10226	0.0855014	0.103621	0.418	1.19622	0.862583	2.0588	39.4678	13.9895
1800	500	0.102959	0.0845984	0.0928062	0.418	1.20761	0.853473	2.06108	35.3485	18.7162
1900	500	0.103336	0.0883237	0.0941402	0.418	1.20877	0.891055	2.09983	35.8565	14.4714
2000	500	0.104453	0.0884948	0.137744	0.418	1.22511	0.892781	2.11789	52.4644	19.5238
2100	500	0.1027	0.0904225	0.172836	0.418	1.19689	0.912229	2.10912	65.8306	9.84271
2200	500	0.103437	0.0869023	0.148736	0.418	1.21195	0.876716	2.08867	56.6513	17.0832
2300	500	0.102799	0.0872408	0.0988399	0.418	1.20211	0.88013	2.08224	37.6466	13.7675
2400	500	0.103951	0.0877225	0.0928997	0.418	1.21859	0.88499	2.10358	35.3841	18.2558
2500	500	0.102644	0.0867691	0.106544	0.418	1.20039	0.875372	2.07576	40.5808	13.7894
2600	500	0.103502	0.0872292	0.111211	0.418	1.21253	0.880014	2.09254	42.3585	16.8595
2700	500	0.103086	0.0883992	0.135321	0.418	1.20498	0.891817	2.0968	51.5415	13.3667
2800	500	0.100407	0.0825163	0.0959226	0.418	1.17243	0.832467	2.0049	36.5355	11.0051
0	600	0.100204	0.0816392	0.117186	0.418	1.17047	0.823619	1.99409	44.6345	11.3681
100	600	0.100097	0.0810028	0.0908087	0.418	1.16963	0.817198	1.98682	34.5876	11.7864
200	600	0.0992335	0.079255	0.0906554	0.418	1.15897	0.799565	1.95854	34.5292	10.9957
300	600	0.0979195	0.074852	0.0690248	0.418	1.14475	0.755146	1.89989	26.2905	12.1927
400	600	0.0981649	0.0751028	0.0584512	0.418	1.14805	0.757676	1.90573	22.2632	12.7604
500	600	0.0980744	0.0757932	0.06759	0.418	1.14595	0.76464	1.91059	25.744	11.4472
600	600	0.0977831	0.0775019	0.0882462	0.418	1.13977	0.781879	1.92165	33.6116	8.57705
700	600	0.0983031	0.076277	0.109251	0.418	1.14874	0.769522	1.91827	41.6121	11.6061
800	600	0.0997032	0.0756488	0.156659	0.418	1.17	0.763185	1.93318	59.669	18.9939
900	600	0.0985758	0.0771303	0.140339	0.418	1.15177	0.778131	1.9299	53.4528	11.4347
1000	600	0.0988035	0.0816782	0.110966	0.418	1.14993	0.824012	1.97394	42.2654	7.37913
1100	600	0.0990212	0.0789561	0.126681	0.418	1.15621	0.79655	1.95276	48.251	10.6566
1200	600	0.0990574	0.0790494	0.166717	0.418	1.15663	0.797491	1.95412	63.5001	10.6632
1300	600	0.0976838	0.0763619	0.203352	0.418	1.13961	0.770378	1.90998	77.4537	9.49236
1400	600	0.0969535	0.0803007	0.155529	0.418	1.12457	0.810115	1.93469	59.2385	4.78123
1500	600	0.0979332	0.0793697	0.131088	0.418	1.13985	0.800723	1.94058	49.9294	7.26321
1600	600	0.0996506	0.0799846	0.0968072	0.418	1.16425	0.806926	1.97118	36.8724	11.5114
1700	600	0.0996637	0.0796819	0.0793301	0.418	1.16479	0.803872	1.96866	30.2156	11.9475
1800	600	0.09939	0.0806244	0.0950447	0.418	1.1597	0.813381	1.97308	36.201	9.91773
1900	600	0.0990188	0.0818225	0.111124	0.418	1.15291	0.825468	1.97837	42.3253	7.76602
2000	600	0.100731	0.0837474	0.141659	0.418	1.17576	0.844887	2.02065	53.9559	10.6577
2100	600	0.095321	0.0831632	0.17672	0.418	1.09785	0.838994	1.93684	67.3099	2.00558
2200	600	0.0996274	0.0827702	0.162548	0.418	1.16072	0.835028	1.99575	61.9119	8.45854
2300	600	0.100034	0.0818101	0.105032	0.418	1.16778	0.825343	1.99312	40.0051	10.6059
2400	600	0.0999866	0.0822822	0.0936212	0.418	1.16654	0.830105	1.99664	35.6589	9.94032
2500	600	0.0999572	0.0815374	0.0822092	0.418	1.16696	0.822591	1.98955	31.3122	10.67
2600	600	0.100189	0.0806597	0.0909346	0.418	1.17137	0.813737	1.98511	34.6356	12.5731
2700	600	0.0982746	0.0805511	0.113738	0.418	1.14349	0.812641	1.95614	43.3212	7.08217
2800	600	0.0989725	0.0810539	0.116933	0.418	1.15311	0.817714	1.97082	44.5382	8.32495
0	700	0.101362	0.0843181	0.135504	0.418	1.18437	0.850645	2.03502	51.6112	12.1218
100	700	0.0965914	0.0803712	0.17179	0.418	1.11925	0.810826	1.93008	65.4322	4.21554
200	700	0.0993995	0.0816568	0.15302	0.418	1.15866	0.823795	1.98245	58.283	8.89023
300	700	0.0988477	0.0786122	0.103459	0.418	1.15406	0.793081	1.94714	39.4059	10.5037
400	700	0.0985471	0.0788681	0.0709407	0.418	1.14938	0.795662	1.94504	27.0202	9.30548
500	700	0.0982945	0.0774764	0.0969264	0.418	1.14726	0.781622	1.92889	36.9178	10.0815
600	700	0.0978755	0.0783285	0.101456	0.418	1.14019	0.790218	1.93041	38.643	8.02908
700	700	0.0981502	0.0786722	0.110819	0.418	1.14381	0.793686	1.93749	42.2093	8.41244
800	700	0.0992536	0.0777973	0.138784	0.418	1.16093	0.78486	1.94579	52.8607	13.021
900	700	0.0983624	0.0816638	0.152029	0.418	1.14351	0.823866	1.96738	57.9055	6.43815
1000	700	0.0992776	0.0817267	0.0935335	0.418	1.1568	0.824501	1.9813	35.6255	8.49926
1100	700	0.0991839	0.0840609	0.127847	0.418	1.15276	0.848049	2.00081	48.6948	6.42902
1200	700	0.0972493	0.0800494	0.140208	0.418	1.12915	0.80758	1.93673	53.4031	5.41201
1300	700	0.0937478	0.0724672	0.198208	0.418	1.08687	0.731086	1.81795	75.4943	4.27429
1400	700	0.0975243	0.0816481	0.144061	0.418	1.13135	0.823708	1.95506	54.8705	4.94047
1500	700	0.0992205	0.0809877	0.119134	0.418	1.15681	0.817046	1.97385	45.3763	9.05045
1600	700	0.0993909	0.0805625	0.0863333	0.418	1.15979	0.812756	1.97254	32.883	9.98781
1700	700	0.099732	0.081298	0.0833104	0.418	1.16394	0.820177	1.98411	31.7317	10.2275
1800	700	0.100374	0.0836897	0.104075	0.418	1.17059	0.844305	2.0149	39.6404	9.63148
1900	700	0.0990304	0.0806074	0.154321	0.418	1.15446	0.813209	1.96767	58.7785	8.90026
2000	700	0.100559	0.0823206	0.149274	0.418	1.1749	0.830492	2.00539	56.8562	11.7603
2100	700	0.0972901	0.0791272	0.181476	0.418	1.13077	0.798276	1.92905	69.1213	6.09028
2200	700	0.0967074	0.0824809	0.150281	0.418	1.11858	0.83211	1.95069	57.2398	3.45134
2300	700	0.100244	0.0826838	0.0940681	0.418	1.16984	0.834157	2.004	35.8291	10.2941
2400	700	0.0990393	0.0814806	0.0772476	0.418	1.1536	0.822019	1.97561	29.4224	8.11155
2500	700	0.0994626	0.0809664	0.0642544	0.418	1.16037	0.816831	1.9772	24.4735	9.76844
2600	700	0.0994625	0.0813006	0.0871712	0.418	1.15999	0.820202	1.98019	33.2022	9.41986
2700	700	0.0993302	0.0890936	0.119697	0.418	1.14914	0.898823	2.04797	45.5907	3.99894
2800	700	0.0992186	0.0927214	0.150665	0.418	1.14338	0.935421	2.0788	57.386	2.68972
0	800	0.09909	0.0930733	0.104308	0.418	1.14112	0.938972	2.08009	39.7292	2.49231
100	800	0.0997846	0.0912719	0.132757	0.418	1.15325	0.920798	2.07405	50.565	3.71867
200	800	0.0975475	0.0911318	0.183583	0.418	1.12104	0.919384	2.04042	69.924	1.81569
300	800	0.0988423	0.0916241	0.136796	0.418	1.13918	0.924351	2.06353	52.1033	2.65218
400	800	0.100167	0.0917837	0.152011	0.418	1.15823	0.925961	2.08419	57.8986	3.99246
500	800	0.100894	0.0892533	0.153631	0.418	1.17177	0.900434	2.0722	58.5155	6.41221
600	800	0.0983734	0.0901469	0.126486	0.418	1.13407	0.909448	2.04352	48.1764	2.63938
700	800	0.0981578	0.0901387	0.113498	0.418	1.13096	0.909365	2.04033	43.2298	2.461
800	800	0.0983308	0.0888135	0.163823	0.418	1.13496	0.895996	2.03096	62.3975	2.98241
900	800	0.096037	0.0886425	0.144623	0.418	1.1021	0.894272	1.99637	55.0846	1.40632
1000	800	0.100368	0.092928	0.118998	0.418	1.15984	0.937506	2.09734	45.3244	3.80785
1100	800	0.0999671	0.0928913	0.13876	0.418	1.15404	0.937135	2.09118	52.8515	3.36502
1200	800	0.100662	0.0907566	0.159814	0.418	1.16662	0.9156	2.08222	60.8706	5.15044
1300	800	0.0956491	0.0940127	0.207881	0.418	1.09062	0.948449	2.03907	79.1787	0.701306
1400	800	0.0993473	0.0894435	0.14369	0.418	1.14899	0.902352	2.05134	54.7294	3.88144
1500	800	0.0997289	0.0921101	0.108369	0.418	1.15148	0.929254	2.08074	41.2759	3.36506
1600	800	0.100529	0.0915281	0.0799986	0.418	1.1638	0.923383	2.08719	30.4702	4.5853
1700	800	0.0989834	0.0913238	0.0786391	0.418	1.14157	0.921322	2.06289	29.9524	2.86081
1800	800	0.099274	0.0922632	0.11134	0.418	1.1447	0.930798	2.0755	42.4076	2.86424
1900	800	0.0985629	0.0934678	0.160752	0.418	1.13304	0.942951	2.076	61.2281	2.01675
2000	800	0.100394	0.091975	0.172007	0.418	1.16131	0.927891	2.0892	65.5148	4.20821
2100	800	0.0992105	0.0951899	0.182489	0.418	1.14044	0.960325	2.10077	69.5074	2.11219
2200	800	0.0991122	0.0958184	0.152856	0.418	1.1383	0.966666	2.10497	58.2203	1.92574
2300	800	0.100639	0.0931652	0.106827	0.418	1.16351	0.939898	2.10341	40.6886	4.05323
2400	800	0.100228	0.091971	0.092049	0.418	1.1589	0.927851	2.08675	35.0601	3.99635
2500	800	0.0989791	0.0928739	0.087523	0.418	1.13974	0.93696	2.0767	33.3362	2.45116
2600	800	0.0993029	0.091316	0.0690748	0.418	1.14621	0.921243	2.06745	26.3095	3.17414
2700	800	0.0996376	0.091857	0.100317	0.418	1.15045	0.926701	2.07715	38.2092	3.3503
2800	800	0.0995086	0.0925325	0.143146	0.418	1.1478	0.933515	2.08131	54.5222	3.00893
0	900	0.0986284	0.0879533	0.0899966	0.418	1.14025	0.887319	2.02757	34.2783	3.5884
100	900	0.0994571	0.0879847	0.102908	0.418	1.15226	0.887636	2.03989	39.1961	4.65861
200	900	0.0984955	0.0947121	0.130123	0.418	1.13066	0.955505	2.08617	49.5617	1.74636
300	900	0.0978145	0.0960127	0.157243	0.418	1.11939	0.968625	2.08801	59.8915	1.22352
400	900	0.0984364	0.0907393	0.169597	0.418	1.13431	0.915425	2.04973	64.5967	2.53777
500	900	0.0977823	0.088793	0.128045	0.418	1.12705	0.895789	2.02284	48.7705	2.49641
600	900	0.0974456	0.0895221	0.110691	0.418	1.12137	0.903145	2.02452	42.1605	2.06976
700	900	0.0970724	0.0912934	0.126957	0.418	1.11402	0.921015	2.03503	48.3561	1.52095
800	900	0.0976819	0.0878252	0.152148	0.418	1.12669	0.886026	2.01272	57.9507	2.67104
900	900	0.0987825	0.0895131	0.145332	0.418	1.14071	0.903055	2.04377	55.3547	3.21535
1000	900	0.0992201	0.0887776	0.133439	0.418	1.1479	0.895635	2.04354	50.8247	3.98668
1100	900	0.0985546	0.0911709	0.143539	0.418	1.13553	0.919779	2.05531	54.6717	2.52595
1200	900	0.0967635	0.0903678	0.183548	0.418	1.11061	0.911677	2.02229	69.9104	1.50578
1300	900	0.0957983	0.090954	0.196117	0.418	1.09612	0.917591	2.01371	74.6978	1.01405
1400	900	0.0992934	0.0927504	0.120879	0.418	1.14443	0.935714	2.08014	46.0411	2.74788
1500	900	0.0995623	0.091037	0.0907419	0.418	1.15029	0.918428	2.06872	34.5622	3.54576
1600	900	0.0970657	0.0921182	0.0957241	0.418	1.113	0.929336	2.04234	36.4598	1.39508
1700	900	0.0992398	0.0917909	0.115359	0.418	1.14475	0.926034	2.07078	43.9386	2.96763
1800	900	0.0981595	0.0914835	0.117535	0.418	1.12947	0.922933	2.0524	44.7673	2.14921
1900	900	0.100624	0.0922583	0.144956	0.418	1.16434	0.93075	2.09509	55.2114	4.40111
2000	900	0.0986001	0.0938234	0.138296	0.418	1.13318	0.946539	2.07972	52.675	1.97177
2100	900	0.0997399	0.0951922	0.169225	0.418	1.1481	0.960348	2.10845	64.455	2.509
2200	900	0.0987307	0.0946968	0.131239	0.418	1.13407	0.955351	2.08942	49.9868	1.89105
2300	900	0.0993673	0.0938029	0.119961	0.418	1.1443	0.946332	2.09063	45.6914	2.5406
2400	900	0.0993069	0.0935113	0.104127	0.418	1.14376	0.943391	2.08715	39.6603	2.56269
2500	900	0.104337	0.0878956	0.0803883	0.418	1.22411	0.886737	2.11085	30.6187	20.0063
2600	900	0.104388	0.0868782	0.0799406	0.418	1.22609	0.876472	2.10256	30.4481	22.3628
2700	900	0.103946	0.0866294	0.0882844	0.418	1.21983	0.873963	2.09379	33.6262	20.253
2800	900	0.102693	0.0867888	0.136544	0.418	1.20109	0.875571	2.07666	52.0076	13.9575
0	1000	0.101815	0.0806407	0.0575118	0.418	1.19536	0.813545	2.0089	21.9054	20.2755
100	1000	0.10313	0.0817265	0.100684	0.418	1.21356	0.8245	2.03806	38.3491	26.2649
200	1000	0.101711	0.0806676	0.142278	0.418	1.19379	0.813816	2.0076	54.1916	19.623
300	1000	0.101217	0.0849706	0.146192	0.418	1.18148	0.857228	2.03871	55.6821	10.8635
400	1000	0.0985457	0.0895887	0.155343	0.418	1.1372	0.903817	2.04101	59.1678	2.9549
500	1000	0.102087	0.0835426	0.13021	0.418	1.19597	0.842821	2.03879	49.595	16.2199
600	1000	0.104388	0.0870614	0.109168	0.418	1.22587	0.87832	2.10419	41.5804	21.9749
700	1000	0.10476	0.0836188	0.116749	0.418	1.23555	0.84359	2.07914	44.468	33.978
800	1000	0.103759	0.0828751	0.110001	0.418	1.22154	0.836087	2.05762	41.8977	27.8324
900	1000	0.103288	0.0842777	0.119044	0.418	1.21286	0.850237	2.0631	45.3419	21.2071
1000	1000	0.102948	0.0853093	0.0992013	0.418	1.20661	0.860644	2.06725	37.7842	17.3816
1100	1000	0.102166	0.0839585	0.105749	0.418	1.19665	0.847016	2.04366	40.278	15.9069
1200	1000	0.102641	0.0847212	0.140703	0.418	1.20276	0.854711	2.05747	53.5916	16.8826
1300	1000	0.105702	0.0825282	0.185255	0.418	1.25097	0.832587	2.08355	70.5608	48.6063
1400	1000	0.101291	0.0898703	0.152411	0.418	1.17686	0.906658	2.08352	58.0509	6.81225
1500	1000	0.103198	0.0865563	0.0911242	0.418	1.20883	0.873225	2.08206	34.7078	16.5101
1600	1000	0.104751	0.0850926	0.0839445	0.418	1.23365	0.858458	2.09211	31.9732	29.3546
1700	1000	0.104213	0.0843525	0.0890348	0.418	1.22653	0.850991	2.07752	33.912	27.2358
1800	1000	0.103155	0.0863962	0.110202	0.418	1.20839	0.871609	2.08	41.9743	16.5666
1900	1000	0.104269	0.0874255	0.128299	0.418	1.22366	0.881993	2.10565	48.8669	20.5288
2000	1000	0.105773	0.088451	0.117186	0.418	1.24482	0.892339	2.13716	44.6344	28.1694
2100	1000	0.103909	0.0905268	0.121604	0.418	1.21461	0.913281	2.12789	46.3171	13.8364
2200	1000	0.103637	0.0894772	0.111705	0.418	1.21184	0.902692	2.11453	42.5469	14.1286
2300	1000	0.105318	0.0890191	0.11966	0.418	1.23735	0.89807	2.13542	45.5768	23.6139
2400	1000	0.103439	0.0876721	0.0979514	0.418	1.21106	0.884482	2.09554	37.3082	15.8653
2500	1000	0.102939	0.0877805	0.103539	0.418	1.20354	0.885575	2.08912	39.4363	13.6007
2600	1000	0.104582	0.0862187	0.10024	0.418	1.22976	0.869818	2.09958	38.1799	25.1347
2700	1000	0.104988	0.0877543	0.0920024	0.418	1.23397	0.88531	2.11928	35.0423	24.2812
2800	1000	0.104184	0.0888485	0.150307	0.418	1.2207	0.896349	2.11704	57.2497	17.5119
0	1100	0.101991	0.0793954	0.0634534	0.418	1.19942	0.800982	2.0004	24.1684	24.3251
100	1100	0.101862	0.080408	0.0745518	0.418	1.19632	0.811197	2.00752	28.3956	21.0588
200	1100	0.101212	0.0808541	0.11111	0.418	1.1862	0.815698	2.0019	42.3202	16.6517
300	1100	0.10194	0.0814017	0.105818	0.418	1.1963	0.821223	2.01753	40.3043	19.3972
400	1100	0.10134	0.0826262	0.118009	0.418	1.18603	0.833575	2.0196	44.9477	14.3479
500	1100	0.102466	0.0845448	0.126249	0.418	1.20038	0.852932	2.05331	48.0863	16.3414
600	1100	0.105147	0.0833435	0.10817	0.418	1.24167	0.840813	2.08248	41.2003	38.7393
700	1100	0.103912	0.0850455	0.119419	0.418	1.22121	0.857983	2.07919	45.4849	23.4061
800	1100	0.10375	0.0839297	0.104499	0.418	1.22014	0.846726	2.06686	39.8021	24.9825
900	1100	0.103917	0.0832186	0.0993285	0.418	1.22348	0.839553	2.06303	37.8327	28.0903
1000	1100	0.10331	0.0828933	0.0908323	0.418	1.21484	0.83627	2.05111	34.5966	24.5216
1100	1100	0.102587	0.0846422	0.0865417	0.418	1.20207	0.853914	2.05598	32.9624	16.7594
1200	1100	0.104439	0.0845451	0.116929	0.418	1.22965	0.852934	2.08258	44.5365	28.4288
1300	1100	0.10329	0.0864663	0.139702	0.418	1.21029	0.872317	2.08261	53.2104	17.0959
1400	1100	0.102971	0.0847137	0.144398	0.418	1.20766	0.854636	2.0623	54.999	18.5678
1500	1100	0.104689	0.0847083	0.151399	0.418	1.23318	0.854581	2.08776	57.6655	29.9566
1600	1100	0.104466	0.0850865	0.0935985	0.418	1.2294	0.858397	2.0878	35.6502	27.1673
1700	1100	0.105111	0.0861619	0.096058	0.418	1.23772	0.869246	2.10697	36.587	29.2058
1800	1100	0.103307	0.0872104	0.0951169	0.418	1.20967	0.879824	2.08949	36.2286	15.98
1900	1100	0.104761	0.0873183	0.0953796	0.418	1.23111	0.880912	2.11202	36.3286	23.7733
2000	1100	0.103965	0.0899264	0.128687	0.418	1.21616	0.907224	2.12338	49.0149	14.8713
2100	1100	0.105948	0.0887879	0.132446	0.418	1.24702	0.895738	2.14276	50.4468	28.6245
2200	1100	0.105631	0.0900552	0.112565	0.418	1.24076	0.908523	2.14928	42.8744	23.3819
2300	1100	0.102105	0.0880544	0.151392	0.418	1.19093	0.888338	2.07927	57.663	10.3824
2400	1100	0.104401	0.0852539	0.0960836	0.418	1.22824	0.860085	2.08833	36.5968	26.2582
2500	1100	0.0996839	0.0870762	0.103739	0.418	1.1566	0.87847	2.03507	39.5125	5.48854
2600	1100	0.0992009	0.0877345	0.119097	0.418	1.14882	0.885111	2.03393	45.3623	4.40709
2700	1100	0.101053	0.0889097	0.109694	0.418	1.17449	0.896968	2.07146	41.7806	6.96226
2800	1100	0.101113	0.0889116	0.127665	0.418	1.17537	0.896987	2.07236	48.6255	7.09001
0	1200	0.0974362	0.0788776	0.0614856	0.418	1.13318	0.795758	1.92893	23.4189	6.56506
100	1200	0.0978366	0.0795908	0.0856695	0.418	1.1382	0.802953	1.94115	32.6302	6.87189
200	1200	0.0980958	0.0818562	0.104758	0.418	1.13942	0.825808	1.96522	39.9007	5.79427
300	1200	0.0996866	0.0830325	0.0964115	0.418	1.16128	0.837675	1.99896	36.7217	8.37574
400	1200	0.0975347	0.0820309	0.109482	0.418	1.13107	0.82757	1.95864	41.7	4.75084
500	1200	0.0992823	0.0851518	0.133942	0.418	1.15295	0.859055	2.01201	51.0163	5.90919
600	1200	0.0999867	0.0852097	0.161275	0.418	1.16317	0.859639	2.02281	61.4271	7.30668
700	1200	0.101279	0.0896778	0.143946	0.418	1.17691	0.904715	2.08162	54.8269	6.91644
800	1200	0.0990364	0.0849523	0.136453	0.418	1.1496	0.857043	2.00664	51.9727	5.58669
900	1200	0.0978112	0.0822743	0.115554	0.418	1.13481	0.830026	1.96483	44.0127	5.05402
1000	1200	0.0993527	0.0837289	0.0873143	0.418	1.15561	0.844701	2.00031	33.2567	7.01825
1100	1200	0.0996717	0.083707	0.0921823	0.418	1.16029	0.84448	2.00477	35.1108	7.76228
1200	1200	0.0998604	0.0827134	0.105323	0.418	1.16419	0.834455	1.99865	40.1158	9.13719
1300	1200	0.098969	0.0848224	0.124266	0.418	1.14876	0.855732	2.00449	47.331	5.54508
1400	1200	0.099586	0.0838301	0.152524	0.418	1.1589	0.845722	2.00462	58.0941	7.4626
1500	1200	0.0988785	0.0872891	0.151589	0.418	1.14464	0.880618	2.02525	57.7379	4.16398
1600	1200	0.0997083	0.0880524	0.0912395	0.418	1.15584	0.888318	2.04416	34.7517	5.00699
1700	1200	0.0988413	0.0888287	0.1028	0.418	1.14235	0.89615	2.0385	39.1549	3.51309
1800	1200	0.101009	0.088386	0.109476	0.418	1.17445	0.891684	2.06613	41.6975	7.23427
1900	1200	0.101577	0.0907233	0.0952122	0.418	1.18005	0.915264	2.09531	36.2649	6.83978
2000	1200	0.100111	0.0895255	0.120546	0.418	1.16002	0.903179	2.0632	45.9141	4.89902
2100	1200	0.100166	0.0862636	0.170641	0.418	1.16457	0.870271	2.03484	64.9946	6.92529
2200	1200	0.103181	0.088266	0.1801	0.418	1.20655	0.890473	2.09702	68.5974	13.9175
2300	1200	0.0923145	0.0845332	0.184876	0.418	1.05348	0.852815	1.90629	70.4165	0.584163
2400	1200	0.0983849	0.0817126	0.172019	0.418	1.14379	0.824359	1.96815	65.5192	6.44928
2500	1200	0.100166	0.0871529	0.158451	0.418	1.16355	0.879243	2.0428	60.3517	6.32549
2600	1200	0.0992396	0.0883535	0.110758	0.418	1.14867	0.891355	2.04003	42.1862	4.18824
2700	1200	0.100718	0.0886368	0.0996238	0.418	1.1699	0.894214	2.06412	37.9452	6.45709
2800	1200	0.0992678	0.0889188	0.130099	0.418	1.14844	0.897059	2.0455	49.5529	3.99029
0	1300	0.097775	0.0806019	0.0781702	0.418	1.13616	0.813154	1.94932	29.7738	6.01501
100	1300	0.098335	0.081163	0.100054	0.418	1.14368	0.818814	1.9625	38.1091	6.7448
200	1300	0.0977877	0.0811359	0.113888	0.418	1.13575	0.818541	1.95429	43.378	5.69005
300	1300	0.0985423	0.0805683	0.133333	0.418	1.14738	0.812814	1.96019	50.7844	7.6854
400	1300	0.0987056	0.0806421	0.101179	0.418	1.14968	0.813559	1.96324	38.5375	8.01988
500	1300	0.0988382	0.0803427	0.117653	0.418	1.15195	0.810538	1.96249	44.8124	8.63682
600	1300	0.097711	0.0837139	0.16779	0.418	1.13173	0.844549	1.97628	63.9086	4.18072
700	1300	0.101022	0.0838661	0.14462	0.418	1.1799	0.846084	2.02598	55.0834	11.4826
800	1300	0.0994758	0.0827873	0.1419	0.418	1.15848	0.835201	1.99368	54.0473	8.05912
900	1300	0.0976814	0.0854167	0.109068	0.418	1.12939	0.861728	1.99112	41.5424	3.44601
1000	1300	0.0970125	0.0785936	0.1291	0.418	1.12734	0.792893	1.92023	49.172	5.9251
1100	1300	0.0985911	0.0824291	0.0806606	0.418	1.14598	0.831587	1.97757	30.7224	6.36307
1200	1300	0.0979402	0.0844442	0.105058	0.418	1.13424	0.851916	1.98615	40.015	4.15996
1300	1300	0.0976065	0.0825543	0.118361	0.418	1.13152	0.83285	1.96437	45.0817	4.58888
1400	1300	0.0994168	0.08358	0.152673	0.418	1.15671	0.843198	1.99991	58.1508	7.27298
1500	1300	0.0991845	0.0851299	0.145561	0.418	1.15155	0.858835	2.01039	55.4418	5.74413
1600	1300	0.0995293	0.0850826	0.0929267	0.418	1.15663	0.858358	2.01499	35.3943	6.42843
1700	1300	0.100407	0.0875874	0.101022	0.418	1.16657	0.883627	2.0502	38.4778	6.51949
1800	1300	0.100396	0.0914499	0.131707	0.418	1.16195	0.922593	2.08454	50.165	4.43135
1900	1300	0.101534	0.0885161	0.125327	0.418	1.182	0.892996	2.07499	47.7352	8.37019
2000	1300	0.100498	0.0878981	0.11138	0.418	1.16755	0.886761	2.05431	42.423	6.49886
2100	1300	0.102451	0.0899193	0.119976	0.418	1.19383	0.907152	2.10098	45.6972	9.59788
2200	1300	0.100968	0.0885262	0.178941	0.418	1.17369	0.893098	2.06679	68.1559	7.04657
2300	1300	0.102511	0.0923466	0.180185	0.418	1.19184	0.93164	2.12348	68.6296	7.76054
2400	1300	0.0997832	0.0864497	0.119902	0.418	1.15877	0.872149	2.03092	45.6688	6.0368
2500	1300	0.101611	0.0863678	0.127485	0.418	1.18564	0.871324	2.05696	48.5572	10.601
2600	1300	0.101955	0.0844971	0.130542	0.418	1.1929	0.85245	2.04535	49.7214	14.1652
2700	1300	0.101055	0.0856854	0.107118	0.418	1.17827	0.864438	2.04271	40.7997	9.62321
2800	1300	0.101145	0.0863988	0.0866723	0.418	1.17876	0.871636	2.05039	33.0121	9.19627
0	1400	0.101429	0.0819197	0.113803	0.418	1.18816	0.826449	2.01461	43.3456	15.8523
100	1400	0.101844	0.0833173	0.122089	0.418	1.19265	0.840548	2.03319	46.5019	15.4716
200	1400	0.0999287	0.0802306	0.122271	0.418	1.16805	0.809408	1.97746	46.5713	12.1846
300	1400	0.100431	0.0781857	0.12187	0.418	1.17779	0.788778	1.96657	46.4182	17.6918
400	1400	0.0993738	0.0793631	0.131129	0.418	1.16091	0.800656	1.96156	49.9451	11.3374
500	1400	0.0996128	0.078723	0.125098	0.418	1.16514	0.794198	1.95934	47.648	13.0801
600	1400	0.10072	0.0786406	0.118859	0.418	1.18153	0.793367	1.97489	45.2714	18.3149
700	1400	0.100458	0.0792193	0.0885515	0.418	1.17699	0.799206	1.9762	33.7279	15.9208
800	1400	0.100028	0.0803618	0.0842475	0.418	1.16936	0.810732	1.98009	32.0886	12.3762
900	1400	0.100545	0.0813532	0.100939	0.418	1.17581	0.820733	1.99654	38.4459	12.9771
1000	1400	0.101206	0.0806993	0.0892581	0.418	1.18629	0.814136	2.00042	33.997	16.8964
1100	1400	0.100412	0.0824946	0.0757294	0.418	1.17254	0.832248	2.00478	28.8441	11.0489
1200	1400	0.10128	0.0801704	0.110961	0.418	1.188	0.8088	1.9968	42.2631	18.2652
1300	1400	0.100852	0.0810276	0.090819	0.418	1.1807	0.817449	1.99815	34.5915	14.7139
1400	1400	0.0998042	0.0824108	0.110035	0.418	1.16372	0.831402	1.99512	41.9107	9.27686
1500	1400	0.101635	0.08135	0.126715	0.418	1.19187	0.820701	2.01257	48.2636	17.8674
1600	1400	0.10134	0.0806795	0.0635578	0.418	1.18829	0.813936	2.00222	24.2082	17.6044
1700	1400	0.100567	0.0819809	0.0833437	0.418	1.17541	0.827065	2.00247	31.7443	12.2194
1800	1400	0.101806	0.0872108	0.125504	0.418	1.18752	0.879828	2.06735	47.8025	10.3265
1900	1400	0.100638	0.0879912	0.160419	0.418	1.16948	0.8877	2.05718	61.1013	6.72017
2000	1400	0.102147	0.0880291	0.126111	0.418	1.19158	0.888083	2.07966	48.0336	10.5373
2100	1400	0.10281	0.0869319	0.125996	0.418	1.20265	0.877014	2.07966	47.9901	14.2368
2200	1400	0.101846	0.0866127	0.146501	0.418	1.18881	0.873794	2.06261	55.7999	11.0902
2300	1400	0.101904	0.0858779	0.158044	0.418	1.19053	0.866381	2.05691	60.1965	12.1409
2400	1400	0.102337	0.0862975	0.129142	0.418	1.19641	0.870614	2.06703	49.1883	13.2135
2500	1400	0.102362	0.0863356	0.132572	0.418	1.19673	0.870998	2.06773	50.4946	13.2593
2600	1400	0.100562	0.084898	0.156089	0.418	1.17195	0.856495	2.02844	59.4519	8.99109
2700	1400	0.0981499	0.0847598	0.162216	0.418	1.13692	0.855101	1.99202	61.7855	4.30225
2800	1400	0.102302	0.0850335	0.097906	0.418	1.19739	0.857862	2.05525	37.2909	14.8418
0	1500	0.0997099	0.0838941	0.154284	0.418	1.16063	0.846367	2.007	58.7646	7.70061
100	1500	0.100496	0.0870456	0.150451	0.418	1.1685	0.878161	2.04666	57.3044	7.07662
200	1500	0.100018	0.0791596	0.154736	0.418	1.17059	0.798603	1.96919	58.9366	14.0688
300	1500	0.101083	0.0800312	0.174625	0.418	1.18526	0.807396	1.99265	66.512	17.51
400	1500	0.101122	0.0793444	0.114911	0.418	1.18663	0.800467	1.9871	43.7679	19.0668
500	1500	0.0989865	0.0778443	0.134962	0.418	1.15697	0.785334	1.9423	51.4051	11.9474
600	1500	0.099434	0.0764432	0.118488	0.418	1.16513	0.771199	1.93633	45.1301	16.0205
700	1500	0.100394	0.0782902	0.0770932	0.418	1.17712	0.789832	1.96695	29.3636	17.2992
800	1500	0.0998096	0.079087	0.0665031	0.418	1.16762	0.79787	1.96549	25.33	13.327
900	1500	0.0997855	0.0796061	0.0836286	0.418	1.16666	0.803107	1.96977	31.8529	12.4966
1000	1500	0.101227	0.0805579	0.13455	0.418	1.18676	0.81271	1.99947	51.2481	17.2576
1100	1500	0.100803	0.0817325	0.101372	0.418	1.17916	0.82456	2.00372	38.6111	13.4547
1200	1500	0.0995916	0.080847	0.0875375	0.418	1.1624	0.815626	1.97802	33.3417	10.2919
1300	1500	0.100814	0.0818087	0.111093	0.418	1.17922	0.825329	2.00455	42.3136	13.3876
1400	1500	0.100744	0.0813178	0.123332	0.418	1.17878	0.820376	1.99915	46.9753	13.8186
1500	1500	0.100338	0.081506	0.144367	0.418	1.17258	0.822274	1.99486	54.987	12.002
1600	1500	0.101151	0.0820603	0.0792073	0.418	1.1839	0.827867	2.01177	30.1688	14.4004
1700	1500	0.100897	0.0827971	0.0630198	0.418	1.17931	0.8353	2.01461	24.0033	12.3675
1800	1500	0.100891	0.079859	0.104552	0.418	1.18263	0.805658	1.98829	39.8224	16.8675
1900	1500	0.100351	0.0878232	0.160344	0.418	1.16547	0.886005	2.05148	61.0725	6.25707
2000	1500	0.102665	0.0882038	0.138577	0.418	1.199	0.889845	2.08884	52.7817	12.0559
2100	1500	0.102677	0.0866733	0.124496	0.418	1.20098	0.874405	2.07539	47.4188	14.0503
2200	1500	0.101805	0.0881525	0.13958	0.418	1.1864	0.889328	2.07573	53.1639	9.40678
2300	1500	0.103854	0.0872642	0.185662	0.418	1.21769	0.880367	2.09806	70.7158	18.5592
2400	1500	0.101888	0.0867154	0.147624	0.418	1.18931	0.87483	2.06414	56.2277	11.1142
2500	1500	0.10113	0.0912282	0.128696	0.418	1.17292	0.920358	2.09328	49.0183	5.68467
2600	1500	0.100855	0.090107	0.152546	0.418	1.1702	0.909046	2.07924	58.1023	5.82509
2700	1500	0.100395	0.0942367	0.170719	0.418	1.15872	0.950708	2.10942	65.0242	3.38888
2800	1500	0.0998817	0.0907519	0.126997	0.418	1.15526	0.915553	2.07082	48.3712	4.03645
0	1600	0.100017	0.0886972	0.150005	0.418	1.1596	0.894823	2.05442	57.1345	5.16776
100	1600	0.100791	0.0901497	0.175829	0.418	1.16921	0.909476	2.07869	66.9706	5.68746
200	1600	0.097116	0.0888626	0.172978	0.418	1.11736	0.896492	2.01385	65.8845	1.98473
300	1600	0.101538	0.0890547	0.206332	0.418	1.18142	0.89843	2.07985	78.5885	7.94841
400	1600	0.0972241	0.0861878	0.125416	0.418	1.12191	0.869507	1.99142	47.7689	2.73023
500	1600	0.0989112	0.0851389	0.0934462	0.418	1.14756	0.858925	2.00649	35.5922	5.26612
600	1600	0.0962322	0.0810637	0.123178	0.418	1.11329	0.817812	1.9311	46.9166	3.46094
700	1600	0.0975212	0.0810986	0.0759499	0.418	1.13192	0.818165	1.95008	28.9281	5.24732
800	1600	0.0965651	0.0795619	0.0522883	0.418	1.11977	0.802661	1.92243	19.9158	4.58586
900	1600	0.0977085	0.0809836	0.0460216	0.418	1.13477	0.817005	1.95177	17.5289	5.64317
1000	1600	0.0980656	0.0830796	0.122762	0.418	1.1376	0.838149	1.97575	46.7581	5.01987
1100	1600	0.098694	0.0835806	0.129952	0.418	1.14617	0.843204	1.98937	49.4966	5.80393
1200	1600	0.0983982	0.0867434	0.0969551	0.418	1.13828	0.875112	2.0134	36.9287	3.778
1300	1600	0.0997418	0.086419	0.110333	0.418	1.1582	0.87184	2.03004	42.0241	5.97839
1400	1600	0.097668	0.086489	0.145045	0.418	1.12799	0.872546	2.00054	55.2454	3.06058
1500	1600	0.10132	0.0847829	0.144316	0.418	1.18321	0.855334	2.03854	54.9678	11.4153
1600	1600	0.0993774	0.0868135	0.101787	0.418	1.15244	0.87582	2.02826	38.7691	5.12227
1700	1600	0.0996882	0.086695	0.0938143	0.418	1.1571	0.874624	2.03173	35.7324	5.71499
1800	1600	0.0993537	0.0888658	0.102289	0.418	1.14975	0.896524	2.04627	38.9603	4.12279
1900	1600	0.0977088	0.0900878	0.13345	0.418	1.12453	0.908853	2.03339	50.8292	2.13196
2000	1600	0.0988223	0.0879101	0.0978144	0.418	1.14311	0.886882	2.03	37.256	3.83611
2100	1600	0.101716	0.0920992	0.0985449	0.418	1.18048	0.929144	2.10963	37.5342	6.25539
2200	1600	0.100643	0.0907251	0.130227	0.418	1.16639	0.915282	2.08167	49.6016	5.13691
2300	1600	0.10148	0.0933561	0.152377	0.418	1.17555	0.941824	2.11738	58.0382	5.16725
2400	1600	0.100812	0.0918903	0.14609	0.418	1.16751	0.927037	2.09455	55.6432	4.8349
2500	1600	0.101213	0.09257	0.134739	0.418	1.17256	0.933894	2.10646	51.3202	5.12709
2600	1600	0.100562	0.0926845	0.151591	0.418	1.16293	0.935049	2.09798	57.7385	4.14227
2700	1600	0.099715	0.0930348	0.153777	0.418	1.15022	0.938583	2.0888	58.5712	3.06179
2800	1600	0.101567	0.0934091	0.169285	0.418	1.17676	0.942359	2.11912	64.4782	5.28002
0	1700	0.100226	0.0887901	0.0810452	0.418	1.16255	0.89576	2.05831	30.8689	5.46465
100	1700	0.100223	0.0902798	0.0964764	0.418	1.16078	0.910789	2.07157	36.7464	4.70787
200	1700	0.0996972	0.0927609	0.130905	0.418	1.15027	0.935819	2.08609	49.8598	3.12633
300	1700	0.0982559	0.0897141	0.159845	0.418	1.13286	0.905083	2.03794	60.8825	2.65398
400	1700	0.0978822	0.08618	0.138905	0.418	1.13144	0.869428	2.00087	52.9067	3.39174
500	1700	0.0987858	0.0854404	0.0672048	0.418	1.14539	0.861967	2.00736	25.5973	4.90296
600	1700	0.0966527	0.0828006	0.0669315	0.418	1.11744	0.835336	1.95277	25.4932	3.2708
700	1700	0.0957708	0.0790976	0.0891824	0.418	1.1088	0.797977	1.90678	33.9682	3.72685
800	1700	0.0968881	0.0794483	0.056887	0.418	1.12458	0.801516	1.92609	21.6674	5.15941
900	1700	0.0966173	0.080627	0.0597204	0.418	1.11934	0.813406	1.93275	22.7466	4.12934
1000	1700	0.0971419	0.0838031	0.0985087	0.418	1.12339	0.845449	1.96884	37.5204	3.43992
1100	1700	0.0988137	0.0848403	0.0925084	0.418	1.14648	0.855913	2.00239	35.235	5.27005
1200	1700	0.0984952	0.0842199	0.12504	0.418	1.14255	0.849654	1.9922	47.6259	5.08935
1300	1700	0.0990992	0.0860106	0.112241	0.418	1.1493	0.867719	2.01702	42.7507	5.09986
1400	1700	0.100608	0.0928043	0.180816	0.418	1.16346	0.936257	2.09972	68.8702	4.15423
1500	1700	0.100501	0.0911565	0.158937	0.418	1.16382	0.919634	2.08345	60.5365	4.71204
1600	1700	0.0998405	0.0906904	0.146095	0.418	1.15473	0.914931	2.06967	55.6454	4.00852
1700	1700	0.100827	0.0878339	0.142301	0.418	1.17243	0.886114	2.05854	54.2003	7.23194
1800	1700	0.100786	0.089481	0.136266	0.418	1.16991	0.902731	2.07264	51.9014	6.06434
1900	1700	0.100047	0.0908731	0.103813	0.418	1.15754	0.916775	2.07431	39.5407	4.20264
2000	1700	0.0986235	0.0890054	0.099126	0.418	1.13898	0.897933	2.03692	37.7556	3.21604
2100	1700	0.0998527	0.0906401	0.0885627	0.418	1.15497	0.914424	2.06939	33.7322	4.04399
2200	1700	0.100351	0.0922864	0.111883	0.418	1.16032	0.931032	2.09135	42.6147	4.02835
2300	1700	0.101705	0.0912594	0.134926	0.418	1.18129	0.920672	2.10196	51.3912	6.75271
2400	1700	0.100991	0.0838827	0.138302	0.418	1.17943	0.846252	2.02568	52.6772	11.359
2500	1700	0.100751	0.0838358	0.149985	0.418	1.17596	0.845779	2.02173	57.1268	10.6248
2600	1700	0.100246	0.083319	0.15096	0.418	1.16915	0.840565	2.00971	57.4984	9.63419
2700	1700	0.098923	0.0814495	0.12819	0.418	1.15193	0.821705	1.97364	48.8257	7.85139
2800	1700	0.100804	0.0838979	0.150756	0.418	1.17665	0.846406	2.02306	57.4207	10.7236
0	1800	0.0993664	0.083238	0.0876563	0.418	1.15637	0.839748	1.99611	33.3869	7.42577
100	1800	0.100835	0.0816518	0.0831128	0.418	1.17973	0.823746	2.00347	31.6564	13.7
200	1800	0.0999884	0.0830824	0.101112	0.418	1.16564	0.838178	2.00382	38.5122	9.13533
300	1800	0.100542	0.0844335	0.150444	0.418	1.17219	0.851809	2.024	57.3019	9.37741
400	1800	0.0948642	0.0845791	0.168441	0.418	1.08975	0.853277	1.94303	64.1565	1.4595
500	1800	0.100599	0.0788121	0.084244	0.418	1.17954	0.795097	1.97464	32.0872	17.3502
600	1800	0.0986247	0.0773158	0.0821585	0.418	1.15227	0.780001	1.93227	31.2929	11.3634
700	1800	0.098353	0.0740703	0.0834586	0.418	1.15197	0.747259	1.89923	31.7881	15.2611
800	1800	0.0973969	0.0742087	0.0624057	0.418	1.13784	0.748656	1.88649	23.7694	11.2048
900	1800	0.0968353	0.0733273	0.0583657	0.418	1.13063	0.739764	1.8704	22.2306	10.4666
1000	1800	0.0974265	0.0745206	0.0836743	0.418	1.13792	0.751803	1.88972	31.8703	10.8934
1100	1800	0.0981299	0.0754708	0.074331	0.418	1.14712	0.761388	1.90851	28.3115	12.0911
1200	1800	0.0982124	0.0772969	0.0839954	0.418	1.14627	0.779811	1.92608	31.9926	10.0341
1300	1800	0.097768	0.078177	0.120292	0.418	1.13879	0.78869	1.92748	45.8173	7.89883
1400	1800	0.099069	0.0821848	0.154149	0.418	1.15323	0.829122	1.98235	58.713	7.58406
1500	1800	0.10158	0.0867445	0.181232	0.418	1.18474	0.875124	2.05986	69.0287	10.1141
1600	1800	0.0996183	0.0783788	0.183388	0.418	1.16562	0.790726	1.95635	69.8496	13.6126
1700	1800	0.098888	0.0852572	0.196689	0.418	1.14709	0.860119	2.00721	74.9159	5.16288
1800	1800	0.0996144	0.0825221	0.186062	0.418	1.16081	0.832525	1.99334	70.8681	8.65102
1900	1800	0.100232	0.0821754	0.150266	0.418	1.17025	0.829028	1.99928	57.234	10.826
2000	1800	0.0998611	0.0824269	0.110571	0.418	1.16453	0.831565	1.9961	42.1146	9.42238
2100	1800	0.100518	0.0828063	0.0983769	0.418	1.17373	0.835393	2.00913	37.4702	11.0368
2200	1800	0.0995547	0.0818888	0.114461	0.418	1.16066	0.826137	1.9868	43.5963	9.09204
2300	1800	0.100442	0.0831552	0.117516	0.418	1.1722	0.838912	2.01111	44.76	10.3962
2400	1800	0.0994266	0.0855759	0.145815	0.418	1.15457	0.863334	2.0179	55.5386	5.91366
2500	1800	0.100238	0.0840986	0.145154	0.418	1.16812	0.84843	2.01655	55.287	8.85577
2600	1800	0.100065	0.083289	0.13551	0.418	1.16653	0.840263	2.00679	51.6137	9.14962
2700	1800	0.101008	0.08454	0.100893	0.418	1.17891	0.852883	2.03179	38.4287	10.6676
2800	1800	0.0995542	0.0853822	0.120671	0.418	1.15665	0.86138	2.01803	45.9616	6.27899
0	1900	0.099975	0.0838463	0.0952718	0.418	1.16457	0.845884	2.01045	36.2876	8.39404
100	1900	0.100418	0.0849742	0.115488	0.418	1.16975	0.857263	2.02701	43.9874	8.54015
200	1900	0.0981004	0.0867535	0.146969	0.418	1.13395	0.875214	2.00917	55.9781	3.42744
300	1900	0.0952373	0.0825944	0.204944	0.418	1.09727	0.833255	1.93053	78.0599	2.07892
400	1900	0.094846	0.0813419	0.173302	0.418	1.09302	0.820619	1.91364	66.0082	2.09917
500	1900	0.0995446	0.0852235	0.138985	0.418	1.1567	0.859778	2.01647	52.9374	6.36466
600	1900	0.100094	0.0788102	0.154476	0.418	1.1721	0.795078	1.96718	58.8374	14.9519
700	1900	0.101574	0.082597	0.139264	0.418	1.18951	0.833281	2.02279	53.0437	15.4089
800	1900	0.0986272	0.0765516	0.115206	0.418	1.15318	0.772292	1.92547	43.8801	12.4129
900	1900	0.0989357	0.0755816	0.0712661	0.418	1.1588	0.762506	1.92131	27.1442	15.2382
1000	1900	0.0976203	0.0760087	0.0751337	0.418	1.13908	0.766815	1.90589	28.6173	9.69958
1100	1900	0.0982594	0.0763188	0.0625166	0.418	1.14806	0.769943	1.918	23.8116	11.3968
1200	1900	0.0983067	0.0771511	0.0536175	0.418	1.14781	0.77834	1.92615	20.4221	10.5042
1300	1900	0.0989916	0.0780082	0.0868089	0.418	1.15685	0.786987	1.94384	33.0642	11.7463
1400	1900	0.0983875	0.0812643	0.150205	0.418	1.14433	0.819836	1.96417	57.2109	6.78072
1500	1900	0.098866	0.0806015	0.198895	0.418	1.15207	0.813149	1.96521	75.7561	8.46594
1600	1900	0.100723	0.0828331	0.199605	0.418	1.17671	0.835663	2.01238	76.0267	11.7009
1700	1900	0.0980141	0.087162	0.201969	0.418	1.13224	0.879335	2.01158	76.927	3.1927
1800	1900	0.099207	0.0856375	0.182023	0.418	1.1513	0.863956	2.01525	69.3296	5.48537
1900	1900	0.0980691	0.0843136	0.174046	0.418	1.13625	0.850599	1.98685	66.2914	4.39753
2000	1900	0.099071	0.0824789	0.148222	0.418	1.15292	0.83209	1.98501	56.4554	7.35136
2100	1900	0.101484	0.0824742	0.105856	0.418	1.18833	0.832043	2.02037	40.319	15.2032
2200	1900	0.100137	0.0822715	0.118608	0.418	1.16875	0.829998	1.99875	45.176	10.413
2300	1900	0.10055	0.0833874	0.122439	0.418	1.17352	0.841255	2.01478	46.6349	10.4817
2400	1900	0.0975469	0.0835029	0.150895	0.418	1.12959	0.84242	1.97201	57.4737	4.05667
2500	1900	0.0999141	0.083757	0.161406	0.418	1.16378	0.844984	2.00876	61.4769	8.31703
2600	1900	0.0994244	0.0842372	0.115755	0.418	1.15607	0.849828	2.0059	44.0894	6.80012
2700	1900	0.0990824	0.082854	0.0866537	0.418	1.15266	0.835874	1.98853	33.0051	7.08552
2800	1900	0.0990717	0.0833412	0.0834201	0.418	1.15195	0.840789	1.99274	31.7734	6.7027
0	2000	0.0952576	0.0844247	0.109354	0.418	1.09556	0.85172	1.94728	41.6513	1.70248
100	2000	0.0977021	0.0845572	0.10706	0.418	1.13066	0.853057	1.98371	40.7775	3.80488
200	2000	0.0995578	0.0842799	0.128891	0.418	1.15797	0.850259	2.00823	49.0927	7.05512
300	2000	0.0954261	0.0810775	0.14331	0.418	1.10165	0.817952	1.9196	54.5846	2.63805
400	2000	0.0977106	0.0810738	0.188827	0.418	1.1347	0.817915	1.95261	71.9213	5.59034
500	2000	0.0998717	0.0844822	0.153993	0.418	1.16232	0.8523	2.01462	58.6535	7.6083
600	2000	0.0993272	0.0869546	0.160211	0.418	1.15154	0.877243	2.02879	61.0219	4.96917
700	2000	0.0985263	0.0854394	0.1471	0.418	1.14162	0.861957	2.00358	56.0281	4.51502
800	2000	0.0970895	0.0827707	0.149396	0.418	1.12379	0.835034	1.95882	56.9025	3.7885
900	2000	0.0963381	0.0836224	0.138069	0.418	1.11198	0.843626	1.95561	52.5882	2.68859
1000	2000	0.0968432	0.0805603	0.122827	0.418	1.12269	0.812734	1.93542	46.7829	4.47906
1100	2000	0.0963702	0.0785527	0.101175	0.418	1.11807	0.79248	1.91055	38.5358	4.83717
1200	2000	0.0964843	0.0791867	0.0827988	0.418	1.11902	0.798876	1.91789	31.5368	4.66419
1300	2000	0.0964108	0.0795104	0.0931081	0.418	1.11759	0.802142	1.91974	35.4634	4.38633
1400	2000	0.0979511	0.0809798	0.12528	0.418	1.1383	0.816966	1.95527	47.7172	6.09808
1500	2000	0.0974107	0.0852012	0.181574	0.418	1.12571	0.859554	1.98527	69.1587	3.22779
1600	2000	0.0936671	0.0827291	0.186288	0.418	1.07464	0.834614	1.90926	70.9544	1.18174
1700	2000	0.0960101	0.0868432	0.178683	0.418	1.1037	0.876119	1.97982	68.0578	1.69013
1800	2000	0.097844	0.0852333	0.162708	0.418	1.13195	0.859878	1.99183	61.9731	3.70518
1900	2000	0.0973679	0.0845141	0.173741	0.418	1.12587	0.852622	1.97849	66.1753	3.42814
2000	2000	0.099168	0.0841916	0.149912	0.418	1.15238	0.849368	2.00175	57.099	6.30914
2100	2000	0.0995395	0.0856714	0.118269	0.418	1.15611	0.864298	2.02041	45.0469	6.06501
2200	2000	0.0989202	0.0854333	0.11595	0.418	1.14736	0.861895	2.00925	44.1635	5.11998
2300	2000	0.0994524	0.0850283	0.107122	0.418	1.15557	0.857809	2.01338	40.8012	6.31227
2400	2000	0.0982896	0.084615	0.126486	0.418	1.13911	0.85364	1.99275	48.1766	4.56938
2500	2000	0.0966816	0.084906	0.149752	0.418	1.11551	0.856575	1.97209	57.0384	2.61825
2600	2000	0.0980998	0.0831915	0.0959663	0.418	1.13797	0.839279	1.97725	36.5521	5.0136
2700	2000	0.0977351	0.0824425	0.102621	0.418	1.13351	0.831723	1.96524	39.0868	4.84178
2800	2000	0.0977529	0.0832766	0.0850486	0.418	1.13283	0.840137	1.97297	32.3937	4.44437

## Sheet: P2F
X (microns)	Y (microns)	A4520 (OH)	A5230 (H2Om)	A2350 (CO2)	thickness (mm)	[OH] wt%	[H2Om] wt%	[H2Ot] wt%	[CO2] ppm	Q (K/s)
0	0	0.089358	0.120962	0.0809187	0.383	1.07481	1.33184	2.40665	33.6372	0.0527249
150	0	0.100115	0.100176	0.0863236	0.383	1.27105	1.10298	2.37403	35.884	12.8855
300	0	0.0995873	0.098996	0.0795913	0.383	1.26408	1.08999	2.35407	33.0854	12.124
450	0	0.0923513	0.0977644	0.0732648	0.383	1.15002	1.07643	2.22645	30.4555	1.25753
600	0	0.097126	0.101456	0.0382167	0.383	1.22106	1.11708	2.33814	15.8864	4.61399
750	0	0.0788234	0.100958	0.0626414	0.383	0.940161	1.11159	2.05175	26.0395	0.00232047
900	0	0.100078	0.093799	0.0841775	0.383	1.27919	1.03277	2.31195	34.9918	21.6358
1050	0	0.0980019	0.0910979	0.0894891	0.383	1.24904	1.00303	2.25207	37.1998	14.8867
1200	0	0.0967106	0.0835844	0.0790435	0.383	1.2381	0.920302	2.1584	32.8577	20.5501
1350	0	0.0972441	0.0852732	0.0874138	0.383	1.24453	0.938896	2.18342	36.3371	20.4396
1500	0	0.0974616	0.0863218	0.0881939	0.383	1.24666	0.950441	2.19711	36.6614	19.7234
1650	0	0.097208	0.08648	0.0849084	0.383	1.24233	0.952183	2.19452	35.2957	18.007
1800	0	0.0974028	0.0852541	0.0852738	0.383	1.24713	0.938685	2.18582	35.4476	21.4689
1950	0	0.095656	0.080962	0.0744314	0.383	1.22445	0.891428	2.11588	30.9405	19.4702
2100	0	0.0951601	0.0799927	0.0717866	0.383	1.21769	0.880755	2.09844	29.8411	18.5047
2250	0	0.0952486	0.0810186	0.0770749	0.383	1.21778	0.892051	2.10983	32.0394	17.084
2400	0	0.0968891	0.084412	0.0859752	0.383	1.2399	0.929413	2.16932	35.7392	19.9851
2550	0	0.0976204	0.0894274	0.0953893	0.383	1.24509	0.984635	2.22973	39.6525	15.4582
2700	0	0.0979168	0.0893872	0.097183	0.383	1.24996	0.984193	2.23415	40.3981	16.96
2850	0	0.0977953	0.0894448	0.0883081	0.383	1.24791	0.984827	2.23273	36.7089	16.2673
3000	0	0.0980405	0.0894319	0.0860436	0.383	1.25191	0.984685	2.23659	35.7676	17.5261
3150	0	0.0979536	0.091041	0.0918073	0.383	1.24834	1.0024	2.25074	38.1635	14.7476
3300	0	0.0979595	0.0895913	0.0903534	0.383	1.25038	0.98644	2.23682	37.5591	16.8591
3450	0	0.0970688	0.0883495	0.0937608	0.383	1.23759	0.972767	2.21035	38.9755	14.4615
3600	0	0.0968926	0.0872628	0.0913487	0.383	1.23617	0.960802	2.19698	37.9729	15.1912
3750	0	0.0962529	0.0884903	0.0862697	0.383	1.2242	0.974317	2.19852	35.8616	11.1008
3900	0	0.0891525	0.0869842	0.0851173	0.383	1.11321	0.957734	2.07094	35.3825	1.14019
4050	0	0.0765703	0.0840971	0.0850046	0.383	0.924847	0.925947	1.85079	35.3357	0.00573295
4200	0	0.0648668	0.079933	0.0785381	0.383	0.760175	0.880098	1.64027	32.6476	6.34188e-06
4350	0	0.051012	0.0776665	0.0729162	0.383	0.574246	0.855143	1.42939	30.3106	1.60448e-11
4500	0	0.0338489	0.0733345	0.0695697	0.383	0.362376	0.807446	1.16982	28.9195	1.59393e-23
4650	0	0.0157667	0.0694821	0.0652492	0.383	0.159481	0.765029	0.924509	27.1235	8.88427e-51
4800	0	-0.00456518	0.0660764	0.0606188	0.383	-0.0430871	0.72753	0.684443	25.1987	2.29643e-87
4950	0	-0.0251627	0.0618719	0.0471836	0.383	-0.220498	0.681237	0.460739	19.6138	1.74492e-28
5100	0	-0.051374	0.0547069	0.0321003	0.383	-0.407312	0.602347	0.195035	13.3438	3.84064e-48
5250	0	-0.0795462	0.0463554	0.0235446	0.383	-0.560032	0.510393	-0.049639	9.78727	#NUM!
0	149.957	0.0990693	0.110752	0.0793741	0.383	1.23972	1.21943	2.45914	32.9951	4.1169
150	149.957	0.100863	0.0990241	0.0838116	0.383	1.28482	1.0903	2.37511	34.8397	17.592
300	149.957	0.100105	0.0982741	0.0794226	0.383	1.27349	1.08204	2.35553	33.0153	14.9947
450	149.957	0.0841699	0.0800718	0.0662289	0.383	1.04405	0.881626	1.92567	27.5308	0.353658
600	149.957	0.0364084	0.0322384	0.0156031	0.383	0.413606	0.354959	0.768565	6.48606	4.15749e-12
750	149.957	0.0786636	0.0582531	0.0563667	0.383	0.983861	0.641393	1.62525	23.4311	0.854754
900	149.957	0.0977646	0.101697	0.0885287	0.383	1.23099	1.11973	2.35071	36.8006	5.5446
1050	149.957	0.0979214	0.0903872	0.0876635	0.383	1.24869	0.995203	2.24389	36.4409	15.4986
1200	149.957	0.0966733	0.0845884	0.078281	0.383	1.23617	0.931355	2.16752	32.5407	18.4068
1350	149.957	0.097412	0.0849415	0.0858039	0.383	1.2477	0.935243	2.18294	35.6679	22.1868
1500	149.957	0.0978341	0.0875044	0.0937995	0.383	1.25114	0.963462	2.2146	38.9916	19.7064
1650	149.957	0.0975474	0.0865212	0.0875043	0.383	1.24779	0.952636	2.20043	36.3748	19.8537
1800	149.957	0.0965654	0.0840609	0.0954907	0.383	1.23511	0.925548	2.16066	39.6947	18.7653
1950	149.957	0.0948265	0.0809118	0.0744494	0.383	1.2111	0.890875	2.10197	30.948	15.1566
2100	149.957	0.0951079	0.0795365	0.0754754	0.383	1.21744	0.875732	2.09317	31.3745	19.1065
2250	149.957	0.0956581	0.0806897	0.0822156	0.383	1.22484	0.888429	2.11327	34.1763	20.0384
2400	149.957	0.0967515	0.0845774	0.088955	0.383	1.23745	0.931234	2.16868	36.9778	18.8666
2550	149.957	0.0969949	0.089946	0.104117	0.383	1.23427	0.990345	2.22461	43.2804	12.1801
2700	149.957	0.0979368	0.0900328	0.0983135	0.383	1.24942	0.991301	2.24072	40.8681	16.0815
2850	149.957	0.0976725	0.0881288	0.0914227	0.383	1.24768	0.970337	2.21801	38.0036	17.7141
3000	149.957	0.0974563	0.0892385	0.0856025	0.383	1.24268	0.982556	2.22524	35.5842	14.9701
3150	149.957	0.0976424	0.089788	0.0866061	0.383	1.24496	0.988606	2.23357	36.0014	15.0525
3300	149.957	0.0961801	0.0896741	0.0844282	0.383	1.22147	0.987351	2.20882	35.0961	9.70154
3450	149.957	0.0958332	0.0887758	0.0881905	0.383	1.21706	0.977461	2.19452	36.66	9.4721
3600	149.957	0.0946017	0.0882874	0.0903496	0.383	1.19791	0.972083	2.16999	37.5575	6.69442
3750	149.957	0.0952512	0.0876571	0.0849624	0.383	1.20915	0.965143	2.1743	35.3181	8.77349
3900	149.957	0.0951166	0.0882933	0.0858973	0.383	1.20616	0.972149	2.17831	35.7068	7.90043
4050	149.957	0.0951078	0.0877205	0.0925097	0.383	1.20677	0.965842	2.17261	38.4555	8.32935
4200	149.957	0.0895991	0.0882593	0.0870849	0.383	1.11864	0.971775	2.09042	36.2004	1.17594
4350	149.957	0.0783622	0.0850956	0.0834063	0.383	0.950415	0.936941	1.88736	34.6712	0.0127408
4500	149.957	0.0647798	0.0808084	0.0785398	0.383	0.758177	0.889736	1.64791	32.6483	5.06502e-06
4650	149.957	0.0484436	0.078763	0.076874	0.383	0.540176	0.867216	1.40739	31.9559	4.37089e-13
4800	149.957	0.0330757	0.0763264	0.0784084	0.383	0.351831	0.840387	1.19222	32.5937	4.93204e-25
4950	149.957	0.0043728	0.0706417	0.0699613	0.383	0.0423886	0.777797	0.820185	29.0823	1.79069e-109
5100	149.957	-0.0142973	0.0651527	0.0482444	0.383	-0.130171	0.71736	0.58719	20.0548	2.78647e-43
5250	149.957	-0.0422474	0.0571998	0.036405	0.383	-0.34723	0.629795	0.282565	15.1333	1.2235e-24
0	299.913	0.0988751	0.0998247	0.0815003	0.383	1.25142	1.09911	2.35053	33.8789	9.13499
150	299.913	0.099934	0.101058	0.0824346	0.383	1.26689	1.11269	2.37959	34.2673	11.3735
300	299.913	0.0987711	0.0995644	0.0810166	0.383	1.25009	1.09625	2.34633	33.6779	9.04158
450	299.913	0.0911857	0.0951939	0.0684041	0.383	1.13493	1.04813	2.18306	28.435	1.04967
600	299.913	0.0652702	0.18154	0.0484358	0.383	0.674921	1.99883	2.67375	20.1343	9.52749e-12
750	299.913	0.0875287	0.140995	0.0803801	0.383	1.02307	1.55241	2.57548	33.4133	0.00507953
900	299.913	0.0990684	0.094752	0.0823196	0.383	1.26143	1.04326	2.30469	34.2195	14.8388
1050	299.913	0.0973726	0.0908151	0.0879299	0.383	1.23922	0.999915	2.23913	36.5517	12.622
1200	299.913	0.0951517	0.0849788	0.0811532	0.383	1.21105	0.935654	2.1467	33.7347	11.0721
1350	299.913	0.0956873	0.0858632	0.0891144	0.383	1.21853	0.945392	2.16392	37.0441	11.9978
1500	299.913	0.0961184	0.0872969	0.109336	0.383	1.2236	0.961178	2.18478	45.4499	11.9342
1650	299.913	0.0960711	0.0869718	0.090767	0.383	1.22327	0.957598	2.18087	37.7311	12.135
1800	299.913	0.0884249	0.0833158	0.1192	0.383	1.10628	0.917343	2.02363	49.5504	1.30032
1950	299.913	0.0944956	0.0809516	0.0809713	0.383	1.20571	0.891313	2.09702	33.659	13.608
2100	299.913	0.0942426	0.081641	0.0804131	0.383	1.20074	0.898903	2.09964	33.427	11.6853
2250	299.913	0.0946079	0.0833262	0.0844772	0.383	1.20444	0.917459	2.1219	35.1164	11.02
2400	299.913	0.0953156	0.0867875	0.0935005	0.383	1.21133	0.955568	2.1669	38.8673	9.74875
2550	299.913	0.0966542	0.089179	0.106784	0.383	1.22977	0.981901	2.21167	44.3893	11.7797
2700	299.913	0.0963939	0.0895259	0.0985354	0.383	1.22511	0.98572	2.21083	40.9603	10.5174
2850	299.913	0.0957237	0.0895014	0.0949851	0.383	1.21434	0.985451	2.19979	39.4845	8.53912
3000	299.913	0.0968888	0.0903105	0.0917704	0.383	1.23206	0.994359	2.22642	38.1481	11.3969
3150	299.913	0.0965881	0.0915539	0.0891621	0.383	1.22556	1.00805	2.23361	37.0639	9.25553
3300	299.913	0.0960241	0.090367	0.0840297	0.383	1.21804	0.994981	2.21302	34.9304	8.65447
3450	299.913	0.0955949	0.0893965	0.0872905	0.383	1.21241	0.984296	2.1967	36.2859	8.27892
3600	299.913	0.0957605	0.087849	0.0886171	0.383	1.2171	0.967256	2.18436	36.8373	10.1183
3750	299.913	0.095544	0.0873249	0.0822182	0.383	1.2143	0.961486	2.17579	34.1774	9.94287
3900	299.913	0.0953685	0.0877768	0.0823662	0.383	1.21088	0.966462	2.17735	34.2389	9.00169
4050	299.913	0.0945741	0.0867105	0.0905339	0.383	1.19951	0.954721	2.15423	37.6341	7.74922
4200	299.913	0.0949735	0.0873644	0.092883	0.383	1.20507	0.961921	2.16699	38.6106	8.26145
4350	299.913	0.0944051	0.0872774	0.0950906	0.383	1.19606	0.960963	2.15703	39.5283	6.93549
4500	299.913	0.088818	0.0868251	0.0954951	0.383	1.10817	0.955983	2.06415	39.6965	1.02261
4650	299.913	0.0769727	0.0845659	0.0839442	0.383	0.930316	0.931109	1.86142	34.8949	0.0066581
4800	299.913	0.0635971	0.0824513	0.0894597	0.383	0.740226	0.907826	1.64805	37.1876	1.48777e-06
4950	299.913	0.0444051	0.0806687	0.0828916	0.383	0.487603	0.888198	1.3758	34.4573	6.24944e-16
5100	299.913	0.0203493	0.0755336	0.0623545	0.383	0.207465	0.831659	1.03912	25.9202	7.94221e-44
5250	299.913	-0.00582111	0.0664929	0.0473422	0.383	-0.0546475	0.732117	0.677469	19.6797	4.52887e-77
0	449.87	0.0988953	0.0992075	0.0829655	0.383	1.25258	1.09232	2.3449	34.488	9.6721
150	449.87	0.0997135	0.100296	0.0856037	0.383	1.26436	1.10431	2.36866	35.5847	11.3229
300	449.87	0.0998608	0.0996451	0.0819005	0.383	1.26764	1.09714	2.36478	34.0453	12.4734
450	449.87	0.0850243	0.122252	0.0578111	0.383	1.00806	1.34604	2.35411	24.0316	0.00663923
600	449.87	0.0590942	0.0781194	0.0527209	0.383	0.681856	0.860129	1.54199	21.9156	7.38657e-08
750	449.87	0.0590948	0.0268382	0.0572462	0.383	0.72341	0.2955	1.01891	23.7967	0.185749
900	449.87	0.100113	0.106136	0.0891371	0.383	1.26283	1.1686	2.43143	37.0535	8.06256
1050	449.87	0.0972292	0.0895249	0.0851502	0.383	1.23862	0.985709	2.22433	35.3962	13.6067
1200	449.87	0.094919	0.0841182	0.0793121	0.383	1.20842	0.926179	2.1346	32.9694	11.2182
1350	449.87	0.0960989	0.0858041	0.090578	0.383	1.22526	0.944741	2.17	37.6525	13.7121
1500	449.87	0.0878601	0.0818626	0.106083	0.383	1.0992	0.901344	2.00054	44.098	1.24018
1650	449.87	0.0947344	0.0861885	0.0887777	0.383	1.20276	0.948974	2.15173	36.9041	8.59377
1800	449.87	0.0940756	0.0824013	0.100928	0.383	1.19707	0.907275	2.10435	41.955	10.2323
1950	449.87	0.0941561	0.0801095	0.0777679	0.383	1.20133	0.882042	2.08337	32.3274	13.3662
2100	449.87	0.0944545	0.0807479	0.081531	0.383	1.20531	0.88907	2.09438	33.8917	13.7245
2250	449.87	0.0944079	0.0819526	0.0881805	0.383	1.203	0.902334	2.10533	36.6559	11.9201
2400	449.87	0.0958529	0.0868676	0.0934015	0.383	1.21988	0.956451	2.17633	38.8262	11.4529
2550	449.87	0.095806	0.0893155	0.104156	0.383	1.21591	0.983404	2.19931	43.2966	8.9206
2700	449.87	0.0965471	0.0893109	0.0975682	0.383	1.22787	0.983353	2.21122	40.5582	11.2555
2850	449.87	0.0964072	0.0897693	0.0941127	0.383	1.225	0.9884	2.2134	39.1218	10.3226
3000	449.87	0.0966631	0.0905181	0.096202	0.383	1.22814	0.996645	2.22479	39.9903	10.4249
3150	449.87	0.0954342	0.0883852	0.0962749	0.383	1.21115	0.97316	2.18431	40.0206	8.66668
3300	449.87	0.0962005	0.0890077	0.088954	0.383	1.22267	0.980015	2.20269	36.9774	10.3976
3450	449.87	0.0952642	0.0869544	0.0910361	0.383	1.21028	0.957406	2.16769	37.8429	9.43549
3600	449.87	0.094925	0.0871682	0.0921588	0.383	1.20455	0.959761	2.16431	38.3096	8.29224
3750	449.87	0.0951928	0.0873902	0.0833965	0.383	1.20856	0.962205	2.17077	34.6672	8.83888
3900	449.87	0.0949876	0.0872175	0.0821091	0.383	1.20549	0.960303	2.16579	34.132	8.41915
4050	449.87	0.0949693	0.0871444	0.087663	0.383	1.20529	0.959499	2.16479	36.4407	8.43023
4200	449.87	0.0953311	0.0874033	0.0979025	0.383	1.21077	0.962349	2.17312	40.6972	9.22451
4350	449.87	0.0948393	0.0859433	0.0979608	0.383	1.20476	0.946274	2.15104	40.7214	9.10698
4500	449.87	0.0941783	0.0859669	0.101899	0.383	1.19412	0.946534	2.14065	42.3584	7.34195
4650	449.87	0.0936257	0.0874606	0.0942366	0.383	1.18336	0.96298	2.14634	39.1733	5.27031
4800	449.87	0.0854264	0.0875204	0.0948921	0.383	1.05473	0.963639	2.01837	39.4458	0.245688
4950	449.87	0.0645953	0.0853791	0.0937155	0.383	0.751546	0.940062	1.69161	38.9567	1.94711e-06
5100	449.87	0.0545675	0.0836249	0.0762561	0.383	0.616716	0.920747	1.53746	31.699	2.28111e-10
5250	449.87	0.0293256	0.0773543	0.0598409	0.383	0.307614	0.851705	1.15932	24.8753	9.01441e-30
0	599.826	0.0996555	0.0978294	0.0834693	0.383	1.26679	1.07715	2.34393	34.6975	13.6226
150	599.826	0.0998826	0.099763	0.0852279	0.383	1.26783	1.09844	2.36627	35.4285	12.4348
300	599.826	0.100011	0.0984731	0.0810922	0.383	1.27168	1.08423	2.35591	33.7093	14.3476
450	599.826	0.0312679	0.078271	0.0505011	0.383	0.329756	0.861799	1.19156	20.9929	1.38094e-27
600	599.826	0.0714112	0.0599533	0.0540258	0.383	0.873061	0.660113	1.53317	22.458	0.0182132
750	599.826	0.0553591	-9.799e-05	0.0660597	0.383	0.690763	-0.00107891	0.689684	27.4604	#NUM!
900	599.826	0.0978397	0.0830175	0.083444	0.383	1.25725	0.914059	2.17131	34.6869	30.3303
1050	599.826	0.0969465	0.0906757	0.0849276	0.383	1.23251	0.998379	2.23089	35.3037	11.2168
1200	599.826	0.0951595	0.0841069	0.0799674	0.383	1.21231	0.926054	2.13837	33.2418	12.115
1350	599.826	0.0959961	0.085695	0.0893272	0.383	1.22374	0.94354	2.16728	37.1325	13.426
1500	599.826	0.0954022	0.086211	0.107776	0.383	1.21347	0.949221	2.1627	44.8014	10.6027
1650	599.826	0.0953048	0.0850108	0.0868924	0.383	1.21347	0.936006	2.14948	36.1204	11.5813
1800	599.826	0.0948455	0.0818865	0.087558	0.383	1.21014	0.901607	2.11175	36.3971	13.7759
1950	599.826	0.0941397	0.0796629	0.0755907	0.383	1.20164	0.877123	2.07876	31.4224	13.9469
2100	599.826	0.0944749	0.080573	0.0797653	0.383	1.20587	0.887145	2.09301	33.1577	14.0698
2250	599.826	0.094527	0.0831398	0.0869714	0.383	1.20338	0.915406	2.11878	36.1532	10.9478
2400	599.826	0.0951798	0.0869275	0.0928458	0.383	1.20896	0.95711	2.16607	38.5952	9.2101
2550	599.826	0.0965453	0.0896145	0.104736	0.383	1.22744	0.986696	2.21413	43.538	10.9333
2700	599.826	0.0963036	0.0885505	0.0936954	0.383	1.22494	0.97498	2.19992	38.9483	11.2128
2850	599.826	0.0966062	0.0894363	0.0915874	0.383	1.22866	0.984733	2.21339	38.0721	11.3294
3000	599.826	0.0959863	0.089337	0.100391	0.383	1.21879	0.98364	2.20243	41.7317	9.42357
3150	599.826	0.0961135	0.0900461	0.0951037	0.383	1.2199	0.991447	2.21135	39.5338	9.17404
3300	599.826	0.0955372	0.0897577	0.0910806	0.383	1.21101	0.988273	2.19928	37.8614	7.8535
3450	599.826	0.0950071	0.0875567	0.090368	0.383	1.20536	0.964038	2.1694	37.5652	8.19506
3600	599.826	0.0954742	0.0868651	0.092073	0.383	1.21378	0.956423	2.1702	38.2739	10.1721
3750	599.826	0.094145	0.0873221	0.0884657	0.383	1.19184	0.961455	2.15329	36.7744	6.34274
3900	599.826	0.0951577	0.0869937	0.0830589	0.383	1.20852	0.957839	2.16636	34.5268	9.08647
4050	599.826	0.0953538	0.0871994	0.0880475	0.383	1.2114	0.960105	2.17151	36.6006	9.47773
4200	599.826	0.0945716	0.0872639	0.0955647	0.383	1.19875	0.960815	2.15956	39.7254	7.33027
4350	599.826	0.0947893	0.0866087	0.0983751	0.383	1.20309	0.9536	2.15669	40.8936	8.38926
4500	599.826	0.0959273	0.084071	0.0992723	0.383	1.22476	0.925659	2.15042	41.2666	15.4334
4650	599.826	0.0952784	0.0833115	0.0962738	0.383	1.21527	0.917297	2.13257	40.0202	13.6274
4800	599.826	0.0959432	0.0836486	0.0961694	0.383	1.22557	0.921008	2.14658	39.9768	16.1775
4950	599.826	0.0928649	0.0875933	0.0989595	0.383	1.17106	0.964441	2.1355	41.1366	4.02725
5100	599.826	0.0799349	0.0851896	0.0876676	0.383	0.97386	0.937975	1.91183	36.4427	0.027471
5250	599.826	0.0615829	0.081576	0.0717796	0.383	0.713108	0.898188	1.6113	29.8381	3.30838e-07
0	749.783	0.0999687	0.0951303	0.0869343	0.383	1.27558	1.04743	2.32301	36.1378	18.721
150	749.783	0.100836	0.0961632	0.0830631	0.383	1.28833	1.0588	2.34713	34.5286	22.0471
300	749.783	0.0992601	0.0958953	0.0810104	0.383	1.26299	1.05585	2.31884	33.6753	14.2472
450	749.783	0.0567926	0.0248958	0.0552146	0.383	0.692087	0.274114	0.966201	22.9522	0.106317
600	749.783	0.0274258	0.077323	-0.0158413	0.383	0.285844	0.85136	1.1372	-6.58507	2.29802e-32
750	749.783	0.080535	0.0682848	0.0630264	0.383	1.00155	0.751845	1.7534	26.1995	0.377715
900	749.783	0.0964769	0.100281	0.0921618	0.383	1.21223	1.10414	2.31636	38.3109	4.12915
1050	749.783	0.0974383	0.0868855	0.085054	0.383	1.24553	0.956648	2.20218	35.3562	18.5641
1200	749.783	0.0957541	0.0813465	0.0845498	0.383	1.22554	0.895661	2.1212	35.1466	19.2822
1350	749.783	0.0972645	0.0837149	0.0937748	0.383	1.24694	0.921738	2.16867	38.9814	23.9305
1500	749.783	0.0969278	0.085073	0.0974496	0.383	1.23965	0.936691	2.17635	40.5089	18.9555
1650	749.783	0.0967776	0.0831205	0.0827948	0.383	1.23981	0.915194	2.155	34.4171	21.9534
1800	749.783	0.0956055	0.0790322	0.082626	0.383	1.22616	0.87018	2.09634	34.3469	23.4473
1950	749.783	0.0954193	0.0777118	0.0746656	0.383	1.22487	0.855641	2.08051	31.0378	25.5022
2100	749.783	0.0958574	0.0789458	0.0789055	0.383	1.23036	0.869228	2.09959	32.8003	25.5253
2250	749.783	0.0960099	0.0812564	0.0859885	0.383	1.2298	0.894669	2.12447	35.7447	21.0322
2400	749.783	0.0970435	0.0850904	0.0867432	0.383	1.24151	0.936883	2.17839	36.0584	19.5928
2550	749.783	0.0977055	0.0868765	0.0985497	0.383	1.24989	0.956549	2.20644	40.9662	20.1215
2700	749.783	0.0954439	0.086224	0.0890228	0.383	1.21413	0.949365	2.16349	37.006	10.729
2850	749.783	0.0969261	0.0860288	0.088648	0.383	1.23836	0.947215	2.18557	36.8502	17.272
3000	749.783	0.097338	0.0869946	0.101064	0.383	1.24376	0.957849	2.20161	42.0114	17.8292
3150	749.783	0.0972101	0.0870344	0.0937767	0.383	1.24163	0.958287	2.19991	38.9822	17.0911
3300	749.783	0.0966732	0.0861258	0.0889105	0.383	1.23413	0.948283	2.18241	36.9593	15.8477
3450	749.783	0.0965132	0.0846803	0.0884887	0.383	1.23345	0.932367	2.16581	36.784	17.378
3600	749.783	0.0959187	0.0833465	0.0879578	0.383	1.22557	0.917682	2.14326	36.5633	16.5502
3750	749.783	0.0963485	0.0836971	0.0841383	0.383	1.23208	0.921542	2.15362	34.9755	18.2175
3900	749.783	0.0958978	0.0848441	0.0831379	0.383	1.22327	0.934171	2.15744	34.5597	14.1631
4050	749.783	0.0959747	0.0854289	0.0854622	0.383	1.22374	0.94061	2.16435	35.5259	13.6908
4200	749.783	0.0962432	0.0848792	0.0913688	0.383	1.22881	0.934557	2.16337	37.9812	15.6954
4350	749.783	0.0957437	0.0849162	0.0939341	0.383	1.22068	0.934965	2.15565	39.0476	13.4071
4500	749.783	0.095875	0.0840117	0.099182	0.383	1.22399	0.925006	2.149	41.2291	15.2774
4650	749.783	0.0948173	0.0829503	0.0989818	0.383	1.2083	0.91332	2.12162	41.1459	12.2368
4800	749.783	0.093845	0.0826736	0.0984519	0.383	1.19302	0.910273	2.10329	40.9256	9.23447
4950	749.783	0.0955343	0.0858416	0.101002	0.383	1.21609	0.945154	2.16124	41.9856	11.4616
5100	749.783	0.0953805	0.0886214	0.0991023	0.383	1.20997	0.975761	2.18573	41.196	8.32795
5250	749.783	0.0828394	0.0873809	0.0857595	0.383	1.01532	0.962102	1.97742	35.6495	0.0813563
0	899.739	0.100265	0.0961118	0.0903707	0.383	1.27906	1.05823	2.33729	37.5663	18.7854
150	899.739	0.100373	0.0955584	0.0839533	0.383	1.2816	1.05214	2.33374	34.8987	20.3026
300	899.739	0.100809	0.0986908	0.0830008	0.383	1.28439	1.08663	2.37102	34.5027	17.792
450	899.739	0.0785258	0.0882821	0.0397983	0.383	0.949426	0.972025	1.92145	16.5438	0.0091593
600	899.739	-0.0539726	0.122472	0.0132128	0.383	-0.372782	1.34847	0.975689	5.49245	4.33977e-18
750	899.739	0.0921162	0.077354	0.0759449	0.383	1.17209	0.851702	2.02379	31.5696	9.36586
900	899.739	0.0999261	0.092214	0.0942324	0.383	1.27888	1.01532	2.2942	39.1716	23.743
1050	899.739	0.0968436	0.0859098	0.0879319	0.383	1.23718	0.945904	2.18308	36.5525	17.0407
1200	899.739	0.0962141	0.081623	0.0857701	0.383	1.23263	0.898706	2.13134	35.6539	21.5481
1350	899.739	0.0970098	0.0833092	0.08868	0.383	1.24333	0.917272	2.1606	36.8635	23.0921
1500	899.739	0.0977338	0.0846447	0.095122	0.383	1.25334	0.931975	2.18532	39.5414	25.1072
1650	899.739	0.0968905	0.0830352	0.0818677	0.383	1.24176	0.914254	2.15601	34.0317	22.8995
1800	899.739	0.0953741	0.0786446	0.0829959	0.383	1.22291	0.865912	2.08883	34.5007	22.7751
1950	899.739	0.0949606	0.0795137	0.0754734	0.383	1.21508	0.875481	2.09057	31.3736	18.3038
2100	899.739	0.0956821	0.0810217	0.0794225	0.383	1.2248	0.892085	2.11688	33.0152	19.5051
2250	899.739	0.0961685	0.0821419	0.0831265	0.383	1.23121	0.904419	2.13563	34.555	20.1634
2400	899.739	0.0955418	0.0894357	0.084471	0.383	1.2115	0.984727	2.19623	35.1139	8.10967
2550	899.739	0.0963433	0.0909198	0.087882	0.383	1.22245	1.00107	2.22352	36.5318	9.089
2700	899.739	0.0960091	0.089476	0.0865346	0.383	1.21897	0.98517	2.20414	35.9717	9.36732
2850	899.739	0.0953603	0.0896694	0.0870899	0.383	1.20828	0.9873	2.19558	36.2025	7.48408
3000	899.739	0.095381	0.0900719	0.0963422	0.383	1.20808	0.991732	2.19982	40.0486	7.25088
3150	899.739	0.0956672	0.0891624	0.0933031	0.383	1.21388	0.981717	2.19559	38.7853	8.66241
3300	899.739	0.0952954	0.0889993	0.0869761	0.383	1.20811	0.979922	2.18803	36.1552	7.81551
3450	899.739	0.0946021	0.0878606	0.0876968	0.383	1.19847	0.967384	2.16585	36.4548	6.981
3600	899.739	0.0946756	0.0864932	0.0866725	0.383	1.20142	0.952328	2.15375	36.029	8.18155
3750	899.739	0.0944758	0.087958	0.0848827	0.383	1.19631	0.968457	2.16477	35.285	6.63641
3900	899.739	0.0943509	0.0888895	0.08453	0.383	1.19311	0.978713	2.17182	35.1384	5.81587
4050	899.739	0.0949515	0.0880668	0.0868818	0.383	1.2038	0.969655	2.17346	36.116	7.65926
4200	899.739	0.0947952	0.0880215	0.0900759	0.383	1.20135	0.969156	2.17051	37.4438	7.31521
4350	899.739	0.09384	0.0886718	0.0911436	0.383	1.18522	0.976316	2.16154	37.8876	5.01865
4500	899.739	0.0945106	0.0873815	0.0926851	0.383	1.19762	0.962109	2.15973	38.5284	7.10379
4650	899.739	0.093109	0.0867459	0.0975697	0.383	1.17603	0.95511	2.13114	40.5589	4.76537
4800	899.739	0.0940355	0.0874806	0.0991571	0.383	1.18988	0.9632	2.15308	41.2187	6.02325
4950	899.739	0.0941148	0.0888325	0.102342	0.383	1.18941	0.978085	2.16749	42.5428	5.41091
5100	899.739	0.0948378	0.0907621	0.104245	0.383	1.19847	0.999331	2.19781	43.3335	5.6955
5250	899.739	0.0930043	0.0929387	0.102727	0.383	1.16646	1.0233	2.18976	42.7029	2.49631
0	1049.7	0.0986385	0.0999048	0.0897716	0.383	1.24748	1.1	2.34748	37.3173	8.44087
150	1049.7	0.098708	0.0995199	0.0869168	0.383	1.24913	1.09576	2.34488	36.1306	8.90153
300	1049.7	0.0978599	0.0996301	0.0859175	0.383	1.23529	1.09697	2.33226	35.7152	6.78364
450	1049.7	0.0591243	0.0787488	0.0652856	0.383	0.681757	0.867059	1.54882	27.1386	6.64787e-08
600	1049.7	0.0195162	0.137089	-0.0222162	0.383	0.181923	1.50941	1.69133	-9.23508	4.69085e-86
750	1049.7	0.0804861	0.0466073	0.0763937	0.383	1.02473	0.513167	1.53789	31.7562	15.6887
900	1049.7	0.0945548	0.103496	0.0897779	0.383	1.17744	1.13954	2.31698	37.3199	1.64605
1050	1049.7	0.0958079	0.0886143	0.0899644	0.383	1.21686	0.975682	2.19254	37.3974	9.54291
1200	1049.7	0.0946148	0.0840258	0.0872975	0.383	1.20364	0.925161	2.1288	36.2888	10.2825
1350	1049.7	0.0954161	0.0867847	0.0865838	0.383	1.21295	0.955538	2.16849	35.9921	10.0661
1500	1049.7	0.0955273	0.0880304	0.0920528	0.383	1.21311	0.969254	2.18236	38.2655	9.23719
1650	1049.7	0.0948842	0.08464	0.0883526	0.383	1.20718	0.931924	2.1391	36.7274	10.5261
1800	1049.7	0.0935638	0.0822021	0.0826829	0.383	1.18911	0.905082	2.09419	34.3705	8.85793
1950	1049.7	0.0940118	0.0817308	0.0773193	0.383	1.19691	0.899893	2.0968	32.141	10.7541
2100	1049.7	0.0946334	0.084366	0.079838	0.383	1.2035	0.928907	2.13241	33.188	9.99217
2250	1049.7	0.0953095	0.0859147	0.0852726	0.383	1.21237	0.945959	2.15833	35.4471	10.6028
2400	1049.7	0.0953445	0.0887299	0.0857843	0.383	1.20925	0.976956	2.18621	35.6598	8.14728
2550	1049.7	0.095928	0.090255	0.0838173	0.383	1.21664	0.993748	2.21039	34.8421	8.48417
2700	1049.7	0.0951806	0.0895571	0.0886535	0.383	1.20554	0.986064	2.1916	36.8525	7.14043
2850	1049.7	0.0954506	0.0894154	0.0904311	0.383	1.21006	0.984503	2.19457	37.5914	7.89255
3000	1049.7	0.0957316	0.0904323	0.0942304	0.383	1.21325	0.9957	2.20895	39.1708	7.83949
3150	1049.7	0.0953737	0.0896221	0.0961655	0.383	1.20856	0.986779	2.19534	39.9752	7.55036
3300	1049.7	0.0956946	0.0876837	0.0904664	0.383	1.21626	0.965436	2.18169	37.6061	10.07
3450	1049.7	0.0947341	0.0881079	0.0858751	0.383	1.20026	0.970107	2.17037	35.6975	7.11174
3600	1049.7	0.0942772	0.0868129	0.0852357	0.383	1.19461	0.955849	2.15046	35.4317	6.96661
3750	1049.7	0.0944678	0.0871862	0.0840741	0.383	1.19719	0.959959	2.15714	34.9489	7.14228
3900	1049.7	0.0946882	0.0876985	0.0844834	0.383	1.20006	0.965599	2.16566	35.119	7.29347
4050	1049.7	0.0946984	0.0872371	0.0883004	0.383	1.20082	0.960519	2.16134	36.7057	7.65731
4200	1049.7	0.0945736	0.0881087	0.0918863	0.383	1.19769	0.970116	2.1678	38.1963	6.75053
4350	1049.7	0.0939615	0.0869929	0.0932649	0.383	1.18933	0.957831	2.14716	38.7694	6.17101
4500	1049.7	0.0942969	0.0879571	0.0890246	0.383	1.19345	0.968446	2.1619	37.0068	6.26053
4650	1049.7	0.0938774	0.0862715	0.0894417	0.383	1.18891	0.949888	2.1388	37.1801	6.45332
4800	1049.7	0.0891617	0.0821424	0.0929741	0.383	1.11927	0.904425	2.0237	38.6485	1.95182
4950	1049.7	0.0940001	0.0886876	0.101386	0.383	1.18776	0.97649	2.16425	42.1453	5.28417
5100	1049.7	0.093228	0.0893482	0.109264	0.383	1.1746	0.983763	2.15836	45.42	3.82281
5250	1049.7	0.0941808	0.091258	0.107748	0.383	1.18733	1.00479	2.19212	44.7898	4.37355
0	1199.65	0.0991336	0.098886	0.0904097	0.383	1.25687	1.08878	2.34565	37.5825	10.6765
150	1199.65	0.0980693	0.0971261	0.0860747	0.383	1.24203	1.0694	2.31143	35.7805	8.94777
300	1199.65	0.0974048	0.0990127	0.0896653	0.383	1.22879	1.09017	2.31897	37.2731	6.19308
450	1199.65	0.0805606	0.0816307	0.0671058	0.383	0.987207	0.89879	1.886	27.8953	0.0586829
600	1199.65	0.0838416	0.0825301	0.0496576	0.383	1.03617	0.908693	1.94486	20.6422	0.227004
750	1199.65	0.113721	0.0336949	0.080786	0.383	1.60248	0.370995	1.97348	33.582	140904
900	1199.65	0.100117	0.0968282	0.0892184	0.383	1.27568	1.06612	2.3418	37.0873	16.9564
1050	1199.65	0.0967453	0.0878357	0.0915561	0.383	1.23303	0.96711	2.20014	38.0591	13.7528
1200	1199.65	0.0956986	0.084682	0.0887117	0.383	1.22026	0.932387	2.15265	36.8767	13.5321
1350	1199.65	0.0963815	0.0860015	0.089093	0.383	1.22957	0.946914	2.17648	37.0352	14.6726
1500	1199.65	0.0963077	0.0863692	0.0932699	0.383	1.22789	0.950963	2.17885	38.7715	13.8409
1650	1199.65	0.0953302	0.0828464	0.0869381	0.383	1.21671	0.912176	2.12889	36.1394	14.5191
1800	1199.65	0.0950626	0.0812986	0.0786201	0.383	1.21441	0.895134	2.10954	32.6817	15.6668
1950	1199.65	0.0948144	0.0816468	0.077608	0.383	1.20995	0.898968	2.10891	32.261	13.9856
2100	1199.65	0.0957109	0.0839634	0.0807906	0.383	1.2214	0.924474	2.14588	33.5839	14.5938
2250	1199.65	0.0955304	0.0849287	0.0867648	0.383	1.21722	0.935103	2.15232	36.0674	12.5308
2400	1199.65	0.0967835	0.0885722	0.0814705	0.383	1.23267	0.975219	2.20789	33.8666	12.9783
2550	1199.65	0.09681	0.0879603	0.080926	0.383	1.23391	0.968482	2.20239	33.6402	13.8633
2700	1199.65	0.096267	0.0885339	0.0924786	0.383	1.22437	0.974798	2.19917	38.4426	11.1033
2850	1199.65	0.0957668	0.0886568	0.0980705	0.383	1.21614	0.976151	2.19229	40.767	9.38164
3000	1199.65	0.0968114	0.0891091	0.0971511	0.383	1.23241	0.981131	2.21354	40.3849	12.4461
3150	1199.65	0.0960436	0.089445	0.0944791	0.383	1.21957	0.98483	2.2044	39.2741	9.49731
3300	1199.65	0.0961823	0.0874686	0.095533	0.383	1.22441	0.963068	2.18748	39.7122	11.9739
3450	1199.65	0.0956493	0.0865116	0.0885579	0.383	1.21706	0.952531	2.1696	36.8127	11.1258
3600	1199.65	0.0956427	0.0857241	0.0852356	0.383	1.21799	0.943861	2.16185	35.4317	11.9951
3750	1199.65	0.0953987	0.0866353	0.0863097	0.383	1.21286	0.953894	2.16676	35.8782	10.1586
3900	1199.65	0.0941133	0.0865158	0.0865139	0.383	1.19237	0.952577	2.14495	35.963	6.80293
4050	1199.65	0.0951573	0.0858198	0.0915307	0.383	1.21004	0.944914	2.15495	38.0485	10.2003
4200	1199.65	0.0953389	0.0869834	0.0968573	0.383	1.21145	0.957726	2.16917	40.2627	9.63428
4350	1199.65	0.0950625	0.0876707	0.095818	0.383	1.2061	0.965293	2.1714	39.8307	8.24963
4500	1199.65	0.0951331	0.0879927	0.0910215	0.383	1.20682	0.968838	2.17566	37.8368	8.17749
4650	1199.65	0.0945892	0.0867046	0.0874608	0.383	1.19976	0.954656	2.15441	36.3567	7.7916
4800	1199.65	0.0939476	0.0860045	0.093772	0.383	1.19038	0.946948	2.13732	38.9802	6.78366
4950	1199.65	0.0939814	0.0863065	0.098201	0.383	1.19053	0.950272	2.1408	40.8213	6.65381
5100	1199.65	0.0949742	0.0883643	0.104665	0.383	1.20378	0.97293	2.17671	43.5085	7.49533
5250	1199.65	0.0958461	0.0900406	0.108625	0.383	1.2156	0.991387	2.20699	45.1543	8.43536
0	1349.61	0.0993356	0.0975757	0.0925968	0.383	1.26193	1.07435	2.33629	38.4917	12.6496
150	1349.61	0.0991438	0.0982134	0.0853787	0.383	1.25795	1.08137	2.33933	35.4912	11.3245
300	1349.61	0.0857282	0.0923039	0.0836254	0.383	1.05375	1.01631	2.07006	34.7624	0.163864
450	1349.61	0.0788618	0.0834903	0.0632865	0.383	0.959612	0.919265	1.87888	26.3077	0.0202482
600	1349.61	0.0605026	-0.0416518	0.0622336	0.383	0.800484	-0.458605	0.341879	25.87	#NUM!
750	1349.61	0.0748311	0.102564	0.0802846	0.383	0.880265	1.12928	2.00954	33.3736	0.000194454
900	1349.61	0.100768	0.0954002	0.0922618	0.383	1.28827	1.0504	2.33867	38.3524	23.0381
1050	1349.61	0.0965956	0.0867278	0.0965422	0.383	1.23207	0.954912	2.18698	40.1318	14.6044
1200	1349.61	0.0948998	0.08417	0.0954059	0.383	1.20804	0.92675	2.13479	39.6594	11.092
1350	1349.61	0.0957471	0.0856546	0.0950746	0.383	1.21977	0.943095	2.16286	39.5217	12.477
1500	1349.61	0.0962308	0.0863283	0.0959339	0.383	1.2267	0.950513	2.17721	39.8789	13.5704
1650	1349.61	0.0951682	0.082783	0.0872359	0.383	1.21418	0.911478	2.12566	36.2632	13.8949
1800	1349.61	0.0942628	0.0803168	0.0794697	0.383	1.20278	0.884323	2.0871	33.0349	13.5228
1950	1349.61	0.0953651	0.0825814	0.0795984	0.383	1.21762	0.909258	2.12688	33.0883	15.0788
2100	1349.61	0.0957604	0.0848137	0.0824274	0.383	1.22109	0.933836	2.15492	34.2643	13.6148
2250	1349.61	0.0960294	0.0857212	0.08594	0.383	1.22424	0.943828	2.16807	35.7245	13.5302
2400	1349.61	0.0967779	0.0886416	0.0806909	0.383	1.23249	0.975983	2.20847	33.5425	12.8716
2550	1349.61	0.0962846	0.0888655	0.0803457	0.383	1.22422	0.978449	2.20267	33.399	10.8186
2700	1349.61	0.0961607	0.0872596	0.0938638	0.383	1.22434	0.960767	2.1851	39.0184	12.1356
2850	1349.61	0.095724	0.0886038	0.0968055	0.383	1.21552	0.975567	2.19109	40.2412	9.30284
3000	1349.61	0.0961348	0.0874956	0.0969991	0.383	1.22361	0.963366	2.18697	40.3217	11.7679
3150	1349.61	0.0958915	0.08745	0.0962675	0.383	1.21974	0.962863	2.1826	40.0175	10.9562
3300	1349.61	0.0958442	0.0873791	0.0970765	0.383	1.21907	0.962083	2.18115	40.3538	10.8696
3450	1349.61	0.0957065	0.086958	0.0922905	0.383	1.2174	0.957447	2.17485	38.3643	10.8445
3600	1349.61	0.0950306	0.0872838	0.086221	0.383	1.20609	0.961034	2.16713	35.8413	8.48039
3750	1349.61	0.0952418	0.0874296	0.0870878	0.383	1.2093	0.962638	2.17194	36.2016	8.94345
3900	1349.61	0.0940453	0.0879839	0.09131	0.383	1.18939	0.968742	2.15813	37.9568	5.74883
4050	1349.61	0.093784	0.0893806	0.0958137	0.383	1.18342	0.98412	2.16754	39.8289	4.59466
4200	1349.61	0.0933496	0.0887837	0.108926	0.383	1.17726	0.977548	2.1548	45.2797	4.21205
4350	1349.61	0.0934663	0.0889941	0.102438	0.383	1.17885	0.979865	2.15871	42.5824	4.29052
4500	1349.61	0.0940738	0.0895466	0.0967122	0.383	1.18783	0.985948	2.17378	40.2024	4.97857
4650	1349.61	0.0933344	0.0888027	0.0929859	0.383	1.17699	0.977758	2.15475	38.6534	4.18259
4800	1349.61	0.0924881	0.0867873	0.0909427	0.383	1.16609	0.955567	2.12165	37.8041	3.84466
4950	1349.61	0.0923372	0.0874026	0.0956401	0.383	1.16291	0.962342	2.12525	39.7568	3.42806
5100	1349.61	0.0933539	0.0897923	0.0984653	0.383	1.17603	0.988653	2.16469	40.9311	3.81854
5250	1349.61	0.0936895	0.0919145	0.105823	0.383	1.17865	1.01202	2.19067	43.9896	3.48234
0	1499.57	0.0977037	0.0990742	0.0960755	0.383	1.23352	1.09085	2.32437	39.9377	6.76885
150	1499.57	0.0977941	0.0986547	0.0898758	0.383	1.23554	1.08623	2.32177	37.3606	7.21442
300	1499.57	0.0839791	0.0819392	0.0887941	0.383	1.03896	0.902187	1.94115	36.9109	0.258829
450	1499.57	0.055987	0.0777612	0.0748739	0.383	0.640088	0.856185	1.49627	31.1244	3.99838e-09
600	1499.57	0.0760107	0.165304	0.0726999	0.383	0.831953	1.82007	2.65202	30.2207	8.90607e-07
750	1499.57	0.0599599	-0.0180089	0.0042268	0.383	0.77271	-0.198287	0.574424	1.75705	#NUM!
900	1499.57	0.0974401	0.0938453	0.0959981	0.383	1.23626	1.03328	2.26954	39.9056	9.8064
1050	1499.57	0.0953542	0.0887995	0.0956082	0.383	1.20932	0.977722	2.18704	39.7435	8.11813
1200	1499.57	0.0947402	0.0864354	0.0982364	0.383	1.20253	0.951692	2.15422	40.836	8.40128
1350	1499.57	0.0950515	0.0890492	0.0955089	0.383	1.20413	0.980471	2.1846	39.7022	7.19204
1500	1499.57	0.0947016	0.0865104	0.0969469	0.383	1.20181	0.952518	2.15433	40.3	8.23613
1650	1499.57	0.0937964	0.0843604	0.086361	0.383	1.19007	0.928845	2.11891	35.8995	7.63312
1800	1499.57	0.0930024	0.0831211	0.0811746	0.383	1.17895	0.9152	2.09415	33.7436	6.68883
1950	1499.57	0.09403	0.0852781	0.0796965	0.383	1.19263	0.93895	2.13158	33.1291	7.50015
2100	1499.57	0.0947685	0.0868885	0.0855033	0.383	1.2024	0.956682	2.15908	35.543	8.1061
2250	1499.57	0.0951051	0.0880786	0.0849799	0.383	1.20626	0.969785	2.17604	35.3254	8.0372
2400	1499.57	0.0950425	0.0894604	0.0877728	0.383	1.20345	0.984998	2.18845	36.4864	6.89304
2550	1499.57	0.0946024	0.0897469	0.0832992	0.383	1.19602	0.988153	2.18418	34.6267	5.81178
2700	1499.57	0.0947186	0.0900694	0.091104	0.383	1.19747	0.991704	2.18917	37.8711	5.85252
2850	1499.57	0.0951233	0.0905127	0.0945488	0.383	1.20337	0.996585	2.19996	39.3031	6.39959
3000	1499.57	0.0953114	0.0905961	0.0944815	0.383	1.20628	0.997504	2.20379	39.2751	6.74689
3150	1499.57	0.0945454	0.0898338	0.0940138	0.383	1.195	0.98911	2.18411	39.0807	5.6566
3300	1499.57	0.0946256	0.0885794	0.0956826	0.383	1.19791	0.975298	2.17321	39.7744	6.55718
3450	1499.57	0.0940079	0.0885184	0.0922998	0.383	1.1881	0.974627	2.16273	38.3682	5.38658
3600	1499.57	0.094052	0.0891188	0.0910077	0.383	1.18803	0.981237	2.16927	37.8311	5.15336
3750	1499.57	0.09465	0.0886191	0.091151	0.383	1.19825	0.975735	2.17398	37.8907	6.58402
3900	1499.57	0.093841	0.0888939	0.0934747	0.383	1.18495	0.978761	2.16371	38.8566	4.91173
4050	1499.57	0.0945631	0.089381	0.0951308	0.383	1.19587	0.984124	2.17999	39.545	5.9438
4200	1499.57	0.0937126	0.0887339	0.0951314	0.383	1.18311	0.977	2.16011	39.5453	4.78075
4350	1499.57	0.0935037	0.0891075	0.103891	0.383	1.1793	0.981113	2.16041	43.1865	4.29659
4500	1499.57	0.0941577	0.0891408	0.0962054	0.383	1.18969	0.981479	2.17117	39.9917	5.32523
4650	1499.57	0.0936766	0.0885526	0.0935489	0.383	1.18277	0.975003	2.15777	38.8875	4.80901
4800	1499.57	0.0929747	0.0884725	0.0901958	0.383	1.17168	0.974121	2.14581	37.4936	3.82682
4950	1499.57	0.0924831	0.0867636	0.08864	0.383	1.16604	0.955305	2.12134	36.8469	3.84745
5100	1499.57	0.0931289	0.0877013	0.0870524	0.383	1.17512	0.96563	2.14075	36.1869	4.35605
5250	1499.57	0.0927567	0.0889873	0.0872206	0.383	1.16756	0.97979	2.14735	36.2568	3.37418
0	1649.52	0.0970864	0.0987479	0.099454	0.383	1.22403	1.08726	2.31129	41.3422	5.7257
150	1649.52	0.0978039	0.0982409	0.0895062	0.383	1.23625	1.08168	2.31793	37.2069	7.49475
300	1649.52	0.0885685	0.0778727	0.0780326	0.383	1.11514	0.857413	1.97255	32.4374	2.57795
450	1649.52	0.0634567	0.0696489	0.0499054	0.383	0.749412	0.766865	1.51628	20.7452	1.59323e-05
600	1649.52	0.066668	0.0352602	0.0604609	0.383	0.826387	0.38823	1.21462	25.1331	0.600114
750	1649.52	0.0341632	0.0833104	0.0483837	0.383	0.361451	0.917284	1.27874	20.1127	1.83048e-25
900	1649.52	0.0970349	0.0971726	0.0968024	0.383	1.2253	1.06991	2.29521	40.2399	6.45087
1050	1649.52	0.0954126	0.0883142	0.090707	0.383	1.21089	0.972378	2.18327	37.7061	8.66634
1200	1649.52	0.0945641	0.0857878	0.0950366	0.383	1.20054	0.944562	2.1451	39.5059	8.46835
1350	1649.52	0.0946119	0.0878043	0.0967603	0.383	1.1987	0.966765	2.16546	40.2224	7.04206
1500	1649.52	0.0943632	0.0857407	0.0980985	0.383	1.19738	0.944043	2.14142	40.7787	7.97487
1650	1649.52	0.0933319	0.0829468	0.0869238	0.383	1.18444	0.913282	2.09772	36.1335	7.59407
1800	1649.52	0.0945064	0.082601	0.0806467	0.383	1.20375	0.909473	2.11322	33.5241	11.4979
1950	1649.52	0.0957669	0.0855492	0.0797784	0.383	1.22023	0.941935	2.16216	33.1632	12.6852
2100	1649.52	0.0962987	0.0874906	0.08715	0.383	1.22626	0.96331	2.18957	36.2275	12.3876
2250	1649.52	0.0963272	0.0879595	0.0848537	0.383	1.2261	0.968473	2.19458	35.2729	11.949
2400	1649.52	0.0960585	0.0889507	0.0912864	0.383	1.22046	0.979387	2.19985	37.9469	9.99931
2550	1649.52	0.0957624	0.0895131	0.0911349	0.383	1.21495	0.985579	2.20053	37.884	8.63496
2700	1649.52	0.096598	0.0888131	0.0892886	0.383	1.22935	0.977872	2.20722	37.1165	11.9824
2850	1649.52	0.0961875	0.0900454	0.091309	0.383	1.22109	0.99144	2.21254	37.9564	9.39041
3000	1649.52	0.0964182	0.0909501	0.0867651	0.383	1.22362	1.0014	2.22502	36.0675	9.27889
3150	1649.52	0.0955347	0.0902784	0.0883283	0.383	1.21028	0.994005	2.20429	36.7173	7.46947
3300	1649.52	0.0959057	0.0874077	0.0935204	0.383	1.22002	0.962398	2.18242	38.8756	11.0501
3450	1649.52	0.0955671	0.0874176	0.0910966	0.383	1.21455	0.962507	2.17706	37.8681	9.92575
3600	1649.52	0.0956019	0.0885073	0.0910949	0.383	1.21369	0.974505	2.18819	37.8673	9.03361
3750	1649.52	0.0952923	0.08864	0.0897184	0.383	1.20853	0.975965	2.1845	37.2952	8.08221
3900	1649.52	0.0948341	0.0886795	0.0901026	0.383	1.20112	0.976401	2.17752	37.4549	6.94815
4050	1649.52	0.094832	0.0876492	0.0960659	0.383	1.20243	0.965056	2.16748	39.9338	7.67704
4200	1649.52	0.0953687	0.088877	0.088928	0.383	1.20945	0.978575	2.18802	36.9666	8.09523
4350	1649.52	0.0958486	0.0893714	0.0896238	0.383	1.21652	0.984019	2.20054	37.2558	8.99378
4500	1649.52	0.0950895	0.0883976	0.0915492	0.383	1.20559	0.973296	2.17889	38.0562	7.75342
4650	1649.52	0.0949363	0.0879413	0.0909321	0.383	1.20372	0.968273	2.172	37.7997	7.71571
4800	1649.52	0.0944979	0.0873855	0.0902025	0.383	1.19741	0.962153	2.15956	37.4964	7.07191
4950	1649.52	0.0940109	0.0869396	0.0841717	0.383	1.19018	0.957244	2.14743	34.9894	6.30547
5100	1649.52	0.0934733	0.0861794	0.0830002	0.383	1.18256	0.948874	2.13144	34.5025	5.70022
5250	1649.52	0.0865921	0.0933721	0.0760029	0.383	1.06577	1.02807	2.09383	31.5937	0.20985
0	1799.48	0.0983315	0.0979023	0.101192	0.383	1.24522	1.07795	2.32317	42.0645	9.08043
150	1799.48	0.0969976	0.0978114	0.0927961	0.383	1.22385	1.07695	2.3008	38.5745	6.03234
300	1799.48	0.102334	0.101924	0.0577444	0.383	1.30485	1.12222	2.42707	24.0038	21.3004
450	1799.48	0.0448275	0.0371778	0.0768089	0.383	0.519642	0.409344	0.928986	31.9288	1.21636e-08
600	1799.48	0.0952566	0.096251	0.0744162	0.383	1.19802	1.05977	2.25778	30.9341	3.93511
750	1799.48	0.0887377	0.0916088	0.0771644	0.383	1.10109	1.00865	2.10975	32.0766	0.596748
900	1799.48	0.0977753	0.0958102	0.0970959	0.383	1.23905	1.05491	2.29396	40.3619	9.15254
1050	1799.48	0.0965619	0.0874966	0.0874124	0.383	1.23051	0.963377	2.19389	36.3366	13.4272
1200	1799.48	0.0949374	0.0855246	0.0917238	0.383	1.20689	0.941664	2.14855	38.1288	9.79649
1350	1799.48	0.0961855	0.0869179	0.101952	0.383	1.22519	0.957004	2.18219	42.3803	12.6391
1500	1799.48	0.0958454	0.085458	0.0982557	0.383	1.22161	0.940931	2.16254	40.8441	13.1156
1650	1799.48	0.0949706	0.0829407	0.0893179	0.383	1.21078	0.913214	2.124	37.1287	12.8533
1800	1799.48	0.0946371	0.0838039	0.0810737	0.383	1.20429	0.922718	2.12701	33.7016	10.5924
1950	1799.48	0.0960192	0.0860289	0.0805407	0.383	1.22367	0.947216	2.17089	33.4801	13.0878
2100	1799.48	0.0962149	0.0874934	0.0864692	0.383	1.2249	0.963341	2.18825	35.9445	12.067
2250	1799.48	0.0962462	0.0877956	0.0835918	0.383	1.22501	0.966668	2.19168	34.7484	11.8368
2400	1799.48	0.0966154	0.0896472	0.0892553	0.383	1.22853	0.987056	2.21558	37.1027	11.1397
2550	1799.48	0.0966239	0.0893555	0.0978527	0.383	1.22905	0.983844	2.21289	40.6765	11.4783
2700	1799.48	0.0969334	0.0896493	0.0925015	0.383	1.23366	0.987078	2.22074	38.4521	12.2861
2850	1799.48	0.0966145	0.0891693	0.0906334	0.383	1.22914	0.981794	2.21094	37.6755	11.6467
3000	1799.48	0.0961492	0.0901289	0.0842792	0.383	1.22037	0.992359	2.21273	35.0341	9.20584
3150	1799.48	0.0957018	0.0892332	0.0832379	0.383	1.21434	0.982497	2.19684	34.6013	8.69884
3300	1799.48	0.0957677	0.087782	0.0891757	0.383	1.21731	0.966518	2.18383	37.0696	10.207
3450	1799.48	0.0955398	0.0876524	0.0877705	0.383	1.2138	0.965092	2.1789	36.4854	9.61902
3600	1799.48	0.0955036	0.0890888	0.0876356	0.383	1.21134	0.980907	2.19225	36.4293	8.28143
3750	1799.48	0.0953694	0.0882661	0.0875484	0.383	1.21026	0.971849	2.18211	36.3931	8.58772
3900	1799.48	0.095436	0.0877045	0.0895313	0.383	1.21207	0.965666	2.17773	37.2174	9.26144
4050	1799.48	0.0950635	0.0875269	0.0976291	0.383	1.20631	0.96371	2.17002	40.5835	8.36888
4200	1799.48	0.0946039	0.0882561	0.0914434	0.383	1.19798	0.971739	2.16972	38.0122	6.71971
4350	1799.48	0.0946389	0.0887408	0.090037	0.383	1.19791	0.977075	2.17499	37.4276	6.48309
4500	1799.48	0.0947509	0.088924	0.0897205	0.383	1.19947	0.979093	2.17856	37.296	6.60484
4650	1799.48	0.0951601	0.0876443	0.0889593	0.383	1.20771	0.965003	2.17271	36.9796	8.53279
4800	1799.48	0.0944161	0.0878429	0.0889763	0.383	1.19551	0.96719	2.1627	36.9867	6.58255
4950	1799.48	0.0933789	0.0864726	0.0870192	0.383	1.18068	0.952102	2.13278	36.1731	5.36229
5100	1799.48	0.0924611	0.0844883	0.0807059	0.383	1.16857	0.930253	2.09883	33.5487	4.83391
5250	1799.48	0.0909826	0.0824561	0.0809445	0.383	1.14763	0.907878	2.05551	33.6479	3.61503
0	1949.43	0.096473	0.0952604	0.0941558	0.383	1.2188	1.04886	2.26766	39.1398	6.38303
150	1949.43	0.0968873	0.0959816	0.088357	0.383	1.22451	1.0568	2.28131	36.7292	6.83085
300	1949.43	0.114577	0.0649452	0.0716378	0.383	1.56896	0.715076	2.28403	29.7792	6866.27
450	1949.43	0.0701866	0.0799738	0.0349086	0.383	0.835766	0.880547	1.71631	14.5112	0.000255268
600	1949.43	0.104762	0.0930556	0.0758516	0.383	1.3576	1.02458	2.38218	31.5308	81.913
750	1949.43	0.0898671	0.100279	0.0853164	0.383	1.10804	1.10412	2.21216	35.4653	0.392147
900	1949.43	0.0979636	0.0932001	0.093008	0.383	1.2456	1.02618	2.27177	38.6626	12.1911
1050	1949.43	0.0949364	0.0862008	0.08175	0.383	1.20599	0.949109	2.1551	33.9827	9.15637
1200	1949.43	0.0947731	0.0844707	0.0924897	0.383	1.20561	0.93006	2.13567	38.4472	10.3363
1350	1949.43	0.094968	0.0854074	0.107947	0.383	1.20753	0.940374	2.1479	44.8725	10.0086
1500	1949.43	0.0937628	0.0838461	0.0978728	0.383	1.19019	0.923183	2.11338	40.6848	7.96072
1650	1949.43	0.0933138	0.0818465	0.0900289	0.383	1.18556	0.901167	2.08673	37.4242	8.47833
1800	1949.43	0.0936717	0.0824758	0.0850704	0.383	1.19049	0.908095	2.09859	35.363	8.9134
1950	1949.43	0.0944717	0.0862947	0.0837968	0.383	1.1984	0.950143	2.14855	34.8336	7.81375
2100	1949.43	0.0947453	0.0869238	0.0872239	0.383	1.20198	0.95707	2.15905	36.2582	8.01774
2250	1949.43	0.0952943	0.0876825	0.087048	0.383	1.20981	0.965423	2.17524	36.1851	8.87275
2400	1949.43	0.0955126	0.0878094	0.0907281	0.383	1.21316	0.966821	2.17998	37.7149	9.39292
2550	1949.43	0.0950919	0.0880722	0.098615	0.383	1.20605	0.969714	2.17577	40.9934	8.00821
2700	1949.43	0.0957296	0.0884805	0.0943497	0.383	1.21578	0.974209	2.18999	39.2203	9.43006
2850	1949.43	0.0943989	0.0885614	0.0927971	0.383	1.1943	0.9751	2.1694	38.575	6.10035
3000	1949.43	0.0949209	0.0884479	0.0853115	0.383	1.20282	0.973851	2.17667	35.4632	7.30828
3150	1949.43	0.0947704	0.0881013	0.0813673	0.383	1.20085	0.970034	2.17089	33.8237	7.20039
3300	1949.43	0.0942299	0.0864753	0.0838646	0.383	1.19429	0.952132	2.14642	34.8618	7.09511
3450	1949.43	0.0940866	0.0861913	0.0824235	0.383	1.19236	0.949004	2.14137	34.2627	6.96683
3600	1949.43	0.0935969	0.0866299	0.0820717	0.383	1.18396	0.953833	2.1378	34.1165	5.67437
3750	1949.43	0.0937938	0.0870132	0.0821554	0.383	1.18662	0.958054	2.14467	34.1513	5.82747
3900	1949.43	0.0941724	0.086314	0.0898463	0.383	1.19358	0.950355	2.14393	37.3483	7.07681
4050	1949.43	0.0929731	0.0867882	0.0970399	0.383	1.17381	0.955577	2.12938	40.3386	4.53267
4200	1949.43	0.0936089	0.0868837	0.0918671	0.383	1.18383	0.956628	2.14046	38.1884	5.55308
4350	1949.43	0.0942079	0.0865878	0.0907516	0.383	1.19379	0.953371	2.14716	37.7246	6.96565
4500	1949.43	0.0937483	0.0875556	0.0921588	0.383	1.18519	0.964027	2.14922	38.3096	5.43757
4650	1949.43	0.0940124	0.0875139	0.0888344	0.383	1.18947	0.963567	2.15304	36.9277	5.95784
4800	1949.43	0.0932789	0.0862727	0.0869411	0.383	1.17934	0.9499	2.12924	36.1407	5.29271
4950	1949.43	0.0936733	0.0859825	0.0877549	0.383	1.18601	0.946705	2.13272	36.4789	6.21292
5100	1949.43	0.0931726	0.08549	0.0837621	0.383	1.17864	0.941283	2.11993	34.8192	5.53336
5250	1949.43	0.0909448	0.083524	0.0836706	0.383	1.1457	0.919636	2.06534	34.7812	3.17608
0	2099.39	0.097914	0.0964017	0.0896719	0.383	1.2405	1.06143	2.30192	37.2758	9.07631
150	2099.39	0.0969329	0.0983983	0.0843441	0.383	1.22203	1.08341	2.30544	35.0611	5.61809
300	2099.39	0.0904951	0.059068	0.0402464	0.383	1.16893	0.650364	1.8193	16.7301	56.7598
450	2099.39	0.0802574	0.0424256	0.0857978	0.383	1.02576	0.467125	1.49289	35.6654	34.2066
600	2099.39	0.0671636	0.10844	0.0696162	0.383	0.766333	1.19397	1.9603	28.9388	4.07652e-07
750	2099.39	0.0979693	0.09982	0.0987318	0.383	1.2368	1.09906	2.33586	41.042	6.90917
900	2099.39	0.0966346	0.0936771	0.09103	0.383	1.2235	1.03143	2.25492	37.8404	7.7418
1050	2099.39	0.0947214	0.0848991	0.083699	0.383	1.20422	0.934776	2.139	34.7929	9.73739
1200	2099.39	0.0935655	0.084597	0.0889337	0.383	1.18607	0.93145	2.11752	36.969	6.90752
1350	2099.39	0.0949094	0.0851459	0.101283	0.383	1.20693	0.937495	2.14442	42.1024	10.0844
1500	2099.39	0.0942157	0.0829941	0.0942978	0.383	1.19856	0.913802	2.11236	39.1988	10.0629
1650	2099.39	0.0926652	0.0802491	0.0850809	0.383	1.17721	0.883579	2.06079	35.3674	8.13826
1800	2099.39	0.0947064	0.0833524	0.0940788	0.383	1.20599	0.917747	2.12374	39.1077	11.3387
1950	2099.39	0.0938937	0.0851107	0.0887932	0.383	1.19066	0.937107	2.12777	36.9106	7.2973
2100	2099.39	0.095151	0.0868781	0.0937014	0.383	1.20856	0.956566	2.16513	38.9509	9.1705
2250	2099.39	0.0949577	0.0876667	0.0919186	0.383	1.20442	0.965249	2.16967	38.2097	7.97991
2400	2099.39	0.0948229	0.0877848	0.0935175	0.383	1.20211	0.966549	2.16866	38.8744	7.55357
2550	2099.39	0.0951725	0.0886288	0.0926637	0.383	1.20662	0.975842	2.18246	38.5195	7.78664
2700	2099.39	0.0951775	0.0870831	0.0908435	0.383	1.20872	0.958824	2.16754	37.7629	9.0641
2850	2099.39	0.0949023	0.0889773	0.0899778	0.383	1.20183	0.979679	2.18151	37.403	6.90149
3000	2099.39	0.0959949	0.0896173	0.0837041	0.383	1.21856	0.986726	2.20528	34.795	9.20184
3150	2099.39	0.0959438	0.0890244	0.0783458	0.383	1.21851	0.980198	2.19871	32.5677	9.57831
3300	2099.39	0.0951909	0.0863301	0.0764002	0.383	1.20992	0.950533	2.16045	31.7589	9.80216
3450	2099.39	0.0953664	0.0868005	0.0789692	0.383	1.21213	0.955712	2.16784	32.8268	9.89388
3600	2099.39	0.0955394	0.0873935	0.0793098	0.383	1.21414	0.962241	2.17638	32.9684	9.86258
3750	2099.39	0.0955429	0.0866912	0.0796883	0.383	1.21511	0.954509	2.16962	33.1257	10.5729
3900	2099.39	0.0945321	0.0874274	0.0855188	0.383	1.1979	0.962615	2.16052	35.5494	7.12118
4050	2099.39	0.0948869	0.0874777	0.088037	0.383	1.20353	0.963168	2.1667	36.5962	7.94627
4200	2099.39	0.0947719	0.0880897	0.0916353	0.383	1.20089	0.969907	2.1708	38.092	7.212
4350	2099.39	0.094593	0.0883591	0.0918997	0.383	1.19767	0.972872	2.17055	38.2019	6.62904
4500	2099.39	0.0948684	0.0894166	0.0935971	0.383	1.20071	0.984516	2.18523	38.9075	6.54278
4650	2099.39	0.0950617	0.0889878	0.0917252	0.383	1.20437	0.979795	2.18417	38.1294	7.2585
4800	2099.39	0.0941886	0.0880508	0.0894413	0.383	1.1916	0.969478	2.16107	37.18	5.98665
4950	2099.39	0.0945379	0.0881341	0.086657	0.383	1.19708	0.970396	2.16748	36.0226	6.65588
5100	2099.39	0.0939734	0.0874733	0.0838547	0.383	1.1889	0.96312	2.15202	34.8577	5.90563
5250	2099.39	0.0926335	0.0856893	0.0802303	0.383	1.16979	0.943477	2.11327	33.351	4.52261
0	2249.35	0.0990025	0.0975693	0.0833041	0.383	1.25654	1.07428	2.33082	34.6288	11.453
150	2249.35	0.0986534	0.0985107	0.081225	0.383	1.24961	1.08465	2.33425	33.7645	9.52103
300	2249.35	0.0812169	0.0980598	0.0718735	0.383	0.978854	1.07968	2.05854	29.8772	0.0110468
450	2249.35	0.110865	0.0701443	0.0569234	0.383	1.49558	0.77232	2.2679	23.6626	2238.71
600	2249.35	0.111031	0.0828446	0.0989522	0.383	1.47914	0.912155	2.3913	41.1336	784.018
750	2249.35	0.0951817	0.100304	0.0961608	0.383	1.19153	1.10439	2.29593	39.9732	2.68348
900	2249.35	0.0992132	0.0960877	0.0878157	0.383	1.26197	1.05797	2.31994	36.5042	13.8225
1050	2249.35	0.0955569	0.0870013	0.0873684	0.383	1.21493	0.957922	2.17286	36.3183	10.3028
1200	2249.35	0.0949785	0.0866169	0.0918622	0.383	1.20612	0.953691	2.15982	38.1863	8.90583
1350	2249.35	0.0953555	0.0869749	0.0938071	0.383	1.21172	0.957632	2.16936	38.9948	9.6931
1500	2249.35	0.0950958	0.0839954	0.086534	0.383	1.21143	0.924827	2.13626	35.9714	12.0091
1650	2249.35	0.094865	0.0822258	0.0809362	0.383	1.21001	0.905343	2.11535	33.6445	13.3826
1800	2249.35	0.0953447	0.0851682	0.0888387	0.383	1.21391	0.93774	2.15165	36.9295	11.5447
1950	2249.35	0.0958713	0.0876585	0.0864898	0.383	1.21914	0.965159	2.1843	35.9531	10.6706
2100	2249.35	0.0960481	0.0886522	0.0922864	0.383	1.22068	0.9761	2.19678	38.3627	10.2537
2250	2249.35	0.0960869	0.0892279	0.0885924	0.383	1.22055	0.982438	2.20299	36.8271	9.8271
2400	2249.35	0.0955197	0.0891209	0.086945	0.383	1.21156	0.98126	2.19282	36.1423	8.29849
2550	2249.35	0.0961663	0.089463	0.0900705	0.383	1.22152	0.985027	2.20655	37.4415	9.8536
2700	2249.35	0.0956999	0.089322	0.0892088	0.383	1.21419	0.983475	2.19767	37.0833	8.62043
2850	2249.35	0.0965095	0.0904226	0.0956217	0.383	1.22579	0.995593	2.22138	39.7491	10.0268
3000	2249.35	0.0958273	0.0883682	0.082819	0.383	1.2175	0.972974	2.19047	34.4271	9.83008
3150	2249.35	0.0952668	0.0870078	0.076767	0.383	1.21025	0.957994	2.16825	31.9114	9.39408
3300	2249.35	0.0950668	0.0869831	0.0749356	0.383	1.20707	0.957723	2.16479	31.1501	8.83601
3450	2249.35	0.094661	0.0863083	0.0774287	0.383	1.20142	0.950293	2.15172	32.1864	8.29423
3600	2249.35	0.0947261	0.085908	0.0799117	0.383	1.20299	0.945885	2.14887	33.2186	8.8139
3750	2249.35	0.0945084	0.0860316	0.0840178	0.383	1.19933	0.947246	2.14658	34.9254	8.1175
3900	2249.35	0.0951914	0.08697	0.0827108	0.383	1.20909	0.957578	2.16667	34.3822	9.20557
4050	2249.35	0.0948775	0.0872933	0.0837832	0.383	1.20362	0.961138	2.16476	34.8279	8.06707
4200	2249.35	0.0947469	0.08711	0.0870421	0.383	1.20176	0.95912	2.16088	36.1826	7.87601
4350	2249.35	0.0951046	0.0875021	0.0921889	0.383	1.207	0.963437	2.17044	38.3221	8.50002
4500	2249.35	0.0947078	0.0883011	0.0977554	0.383	1.19959	0.972235	2.17182	40.6361	6.91984
4650	2249.35	0.0951667	0.0886317	0.0988384	0.383	1.20652	0.975875	2.1824	41.0863	7.76984
4800	2249.35	0.0945753	0.08827	0.0959144	0.383	1.1975	0.971892	2.1694	39.8708	6.64845
4950	2249.35	0.0940545	0.0871654	0.0931147	0.383	1.19059	0.95973	2.15032	38.707	6.25398
5100	2249.35	0.0936837	0.087261	0.086748	0.383	1.18454	0.960782	2.14532	36.0604	5.48118
5250	2249.35	0.0937369	0.0865372	0.0830232	0.383	1.18632	0.952813	2.13913	34.512	5.99909
0	2399.3	0.0989245	0.0967495	0.081881	0.383	1.25638	1.06526	2.32164	34.0372	11.9871
150	2399.3	0.0984413	0.0974569	0.0801579	0.383	1.2476	1.07304	2.32064	33.321	9.75167
300	2399.3	0.0989438	0.0884881	0.057535	0.383	1.2679	0.974293	2.2422	23.9168	24.9178
450	2399.3	0.0768655	0.0898276	0.0895889	0.383	0.923182	0.989042	1.91222	37.2413	0.00312364
600	2399.3	0.0619886	0.0886658	0.0576608	0.383	0.712675	0.97625	1.68893	23.9691	1.23906e-07
750	2399.3	0.0967014	0.102012	0.0906208	0.383	1.21352	1.1232	2.33672	37.6703	3.8392
900	2399.3	0.0959526	0.0939138	0.0877325	0.383	1.21222	1.03403	2.24626	36.4696	6.09859
1050	2399.3	0.0950918	0.0862662	0.0882874	0.383	1.2084	0.949829	2.15823	36.7003	9.55858
1200	2399.3	0.0950842	0.0853375	0.0919755	0.383	1.20949	0.939603	2.1491	38.2334	10.457
1350	2399.3	0.0950725	0.0842704	0.092171	0.383	1.21069	0.927854	2.13855	38.3147	11.5951
1500	2399.3	0.0942723	0.0816546	0.0808811	0.383	1.2012	0.899053	2.10025	33.6215	11.779
1650	2399.3	0.0944381	0.0821211	0.0786512	0.383	1.20327	0.90419	2.10746	32.6946	11.8253
1800	2399.3	0.0944907	0.0851102	0.0908349	0.383	1.20024	0.937101	2.13734	37.7593	8.85398
1950	2399.3	0.0954519	0.0876661	0.0819131	0.383	1.21237	0.965243	2.17762	34.0506	9.34304
2100	2399.3	0.0952349	0.0884036	0.0880819	0.383	1.20792	0.973363	2.18128	36.6149	8.1183
2250	2399.3	0.0953963	0.0872626	0.0890026	0.383	1.21201	0.9608	2.17281	36.9976	9.5472
2400	2399.3	0.0953751	0.0887373	0.0867721	0.383	1.20974	0.977037	2.18677	36.0704	8.22156
2550	2399.3	0.0955855	0.0890249	0.0918519	0.383	1.21274	0.980204	2.19295	38.182	8.55192
2700	2399.3	0.0957299	0.0888027	0.0944327	0.383	1.21536	0.977757	2.19312	39.2548	9.14472
2850	2399.3	0.0948958	0.0882961	0.0972426	0.383	1.20261	0.972179	2.17479	40.4229	7.35711
3000	2399.3	0.0948459	0.0878065	0.0867371	0.383	1.20245	0.966789	2.16924	36.0559	7.59363
3150	2399.3	0.0946404	0.0863677	0.0768121	0.383	1.20102	0.950946	2.15196	31.9301	8.19101
3300	2399.3	0.0950471	0.0861082	0.0817688	0.383	1.20789	0.94809	2.15598	33.9906	9.5722
3450	2399.3	0.0941488	0.0850465	0.0749748	0.383	1.19484	0.9364	2.13124	31.1663	7.98051
3600	2399.3	0.0939972	0.0851617	0.076205	0.383	1.19226	0.937669	2.12992	31.6778	7.50858
3750	2399.3	0.0938202	0.0842378	0.0874101	0.383	1.19061	0.927496	2.1181	36.3356	7.79001
3900	2399.3	0.0939476	0.0843274	0.0854306	0.383	1.19254	0.928482	2.12102	35.5127	8.04545
4050	2399.3	0.0936489	0.0843092	0.0839835	0.383	1.18777	0.928282	2.11605	34.9112	7.31232
4200	2399.3	0.094047	0.0859098	0.0836419	0.383	1.19209	0.945905	2.13799	34.7692	7.07492
4350	2399.3	0.0938579	0.0855125	0.0880388	0.383	1.18957	0.941531	2.1311	36.597	6.92365
4500	2399.3	0.0935824	0.0870794	0.094776	0.383	1.18315	0.958783	2.14194	39.3975	5.39731
4650	2399.3	0.0892507	0.0848911	0.10434	0.383	1.11731	0.934689	2.052	43.3732	1.4851
4800	2399.3	0.0939345	0.0872421	0.09925	0.383	1.18857	0.960575	2.14915	41.2574	5.96617
4950	2399.3	0.093715	0.087511	0.0941898	0.383	1.18472	0.963535	2.14825	39.1539	5.40182
5100	2399.3	0.0927296	0.0867056	0.0910084	0.383	1.17003	0.954667	2.1247	37.8314	4.20942
5250	2399.3	0.0935338	0.0857607	0.0880845	0.383	1.18407	0.944263	2.12833	36.6159	6.0684
0	2549.26	0.0975698	0.0953654	0.0801079	0.383	1.23633	1.05001	2.28634	33.3002	8.92802
150	2549.26	0.0979041	0.0966586	0.0803592	0.383	1.23999	1.06425	2.30425	33.4046	8.85086
300	2549.26	0.0794131	0.116639	0.0414263	0.383	0.931788	1.28425	2.21604	17.2206	0.000600998
450	2549.26	0.0963782	0.0870311	0.0921202	0.383	1.22815	0.958251	2.1864	38.2936	13.2685
600	2549.26	0.0855988	0.112602	0.0575243	0.383	1.02795	1.2398	2.26775	23.9124	0.0204894
750	2549.26	0.100344	0.100446	0.089316	0.383	1.27439	1.10596	2.38035	37.1279	13.4883
900	2549.26	0.0971665	0.0923662	0.0942745	0.383	1.23382	1.01699	2.25081	39.1891	10.2888
1050	2549.26	0.0952219	0.0858639	0.0882661	0.383	1.21102	0.9454	2.15642	36.6915	10.3654
1200	2549.26	0.0950871	0.0846876	0.0944253	0.383	1.21039	0.932448	2.14283	39.2518	11.1697
1350	2549.26	0.0948316	0.0836641	0.0911176	0.383	1.2076	0.921179	2.12878	37.8768	11.4275
1500	2549.26	0.0934849	0.0812056	0.0809353	0.383	1.18912	0.89411	2.08323	33.6441	9.5952
1650	2549.26	0.0937715	0.0820656	0.0783141	0.383	1.19262	0.903579	2.0962	32.5545	9.61076
1800	2549.26	0.0951084	0.0843808	0.0927585	0.383	1.21113	0.92907	2.1402	38.5589	11.5975
1950	2549.26	0.0957762	0.087503	0.0833994	0.383	1.21781	0.963447	2.18126	34.6684	10.5136
2100	2549.26	0.0953044	0.0877211	0.0898357	0.383	1.20993	0.965848	2.17578	37.3439	8.86804
2250	2549.26	0.095393	0.0877009	0.0911498	0.383	1.21138	0.965626	2.177	37.8902	9.13909
2400	2549.26	0.0959953	0.0878642	0.0936528	0.383	1.22087	0.967423	2.18829	38.9307	10.8751
2550	2549.26	0.0955052	0.0878595	0.089858	0.383	1.21298	0.967372	2.18035	37.3532	9.32568
2700	2549.26	0.0945057	0.0873852	0.109241	0.383	1.19754	0.96215	2.15969	45.4107	7.09
2850	2549.26	0.0947896	0.0873274	0.0919252	0.383	1.20217	0.961514	2.16368	38.2125	7.8159
3000	2549.26	0.0950386	0.0858031	0.0860505	0.383	1.20815	0.94473	2.15288	35.7704	9.83994
3150	2549.26	0.094676	0.0854847	0.0834482	0.383	1.20273	0.941224	2.14396	34.6887	9.04876
3300	2549.26	0.0945779	0.0868548	0.0787795	0.383	1.19938	0.95631	2.15569	32.748	7.64856
3450	2549.26	0.0940083	0.0850367	0.0717848	0.383	1.1926	0.936292	2.12889	29.8403	7.63219
3600	2549.26	0.0933627	0.0854632	0.0705604	0.383	1.18171	0.940988	2.1227	29.3313	5.91077
3750	2549.26	0.0941183	0.0849011	0.07947	0.383	1.19453	0.934799	2.12933	33.035	8.01956
3900	2549.26	0.0935836	0.0845034	0.0847805	0.383	1.18648	0.930419	2.1169	35.2425	7.01588
4050	2549.26	0.0930775	0.0845375	0.0866783	0.383	1.17834	0.930795	2.10914	36.0314	5.91444
4200	2549.26	0.0934764	0.0849927	0.0825383	0.383	1.18413	0.935807	2.11994	34.3105	6.44045
4350	2549.26	0.0942537	0.0849472	0.0838684	0.383	1.19665	0.935307	2.13195	34.8634	8.33964
4500	2549.26	0.0948282	0.0857396	0.089057	0.383	1.20485	0.944031	2.14888	37.0202	9.26072
4650	2549.26	0.0945865	0.0859001	0.0942642	0.383	1.20076	0.945799	2.14656	39.1848	8.4343
4800	2549.26	0.0946723	0.0861797	0.096519	0.383	1.20177	0.948877	2.15065	40.1221	8.43151
4950	2549.26	0.0935367	0.0864047	0.0938994	0.383	1.18329	0.951354	2.13464	39.0332	5.69002
5100	2549.26	0.0936674	0.086329	0.0906513	0.383	1.18547	0.950521	2.136	37.6829	5.98722
5250	2549.26	0.0936188	0.0853294	0.0862089	0.383	1.18598	0.939515	2.12549	35.8363	6.52129
0	2699.22	0.0980856	0.0934017	0.0756315	0.383	1.2473	1.02839	2.2757	31.4394	12.4277
150	2699.22	0.0990259	0.0942472	0.0796289	0.383	1.26143	1.0377	2.29913	33.101	15.3044
300	2699.22	0.0239855	0.0856032	0.0751064	0.383	0.244329	0.94253	1.18686	31.2211	3.80367e-41
450	2699.22	0.0934027	0.0958301	0.0938247	0.383	1.16908	1.05513	2.22421	39.0021	2.18196
600	2699.22	0.0799328	0.0830359	0.0446061	0.383	0.976188	0.914263	1.89045	18.5424	0.0362616
750	2699.22	0.0921449	0.101933	0.0988377	0.383	1.1415	1.12233	2.26383	41.086	0.797604
900	2699.22	0.09805	0.0929497	0.0929345	0.383	1.24733	1.02342	2.27075	38.6321	12.7963
1050	2699.22	0.0958067	0.0842677	0.0896497	0.383	1.22255	0.927825	2.15038	37.2666	14.5818
1200	2699.22	0.0955885	0.0839042	0.0968935	0.383	1.2195	0.923823	2.14332	40.2778	14.1346
1350	2699.22	0.0950756	0.0826525	0.0949502	0.383	1.21285	0.91004	2.12289	39.47	13.6806
1500	2699.22	0.094326	0.0797792	0.0817387	0.383	1.20449	0.878405	2.0829	33.9781	14.6066
1650	2699.22	0.0952893	0.0813935	0.0818221	0.383	1.21795	0.896179	2.11413	34.0127	16.6406
1800	2699.22	0.0956141	0.0849895	0.0946591	0.383	1.21849	0.935773	2.15426	39.349	12.7845
1950	2699.22	0.0959152	0.0863755	0.0900919	0.383	1.22153	0.951033	2.17257	37.4504	12.2505
2100	2699.22	0.0963598	0.0870186	0.08843	0.383	1.22787	0.958114	2.18599	36.7596	13.2092
2250	2699.22	0.0958628	0.0874942	0.0872696	0.383	1.21922	0.963351	2.18257	36.2772	10.8121
2400	2699.22	0.0955657	0.0876456	0.0991621	0.383	1.21423	0.965017	2.17925	41.2208	9.70472
2550	2699.22	0.0959853	0.0874705	0.0922763	0.383	1.22123	0.963089	2.18432	38.3585	11.2597
2700	2699.22	0.09563	0.0877806	0.112008	0.383	1.21509	0.966503	2.18159	46.5606	9.77522
2850	2699.22	0.0951892	0.0861661	0.0883827	0.383	1.2101	0.948727	2.15883	36.7399	9.95656
3000	2699.22	0.0952123	0.0846753	0.0829969	0.383	1.21242	0.932313	2.14473	34.5011	11.6333
3150	2699.22	0.0943834	0.0870127	0.0796473	0.383	1.19606	0.958048	2.15411	33.1087	7.06973
3300	2699.22	0.0909478	0.0803387	0.0733818	0.383	1.14972	0.884564	2.03429	30.5042	4.51389
3450	2699.22	0.0941749	0.0848	0.0703885	0.383	1.19557	0.933686	2.12926	29.2599	8.25229
3600	2699.22	0.0945703	0.0837209	0.0757997	0.383	1.20332	0.921804	2.12513	31.5093	10.4579
3750	2699.22	0.0932418	0.0818414	0.077949	0.383	1.18441	0.90111	2.08552	32.4027	8.28594
3900	2699.22	0.0934629	0.0836072	0.084981	0.383	1.18569	0.920552	2.10625	35.3259	7.39893
4050	2699.22	0.0935292	0.0833628	0.0817552	0.383	1.18707	0.917862	2.10493	33.9849	7.7559
4200	2699.22	0.094022	0.0843637	0.0833482	0.383	1.19368	0.928882	2.12257	34.6471	8.21138
4350	2699.22	0.0938049	0.0846108	0.0813564	0.383	1.18988	0.931603	2.12149	33.8192	7.46019
4500	2699.22	0.0938692	0.0860217	0.0828384	0.383	1.1891	0.947137	2.13624	34.4352	6.60024
4650	2699.22	0.093922	0.0854666	0.0873108	0.383	1.19066	0.941025	2.13168	36.2943	7.10329
4800	2699.22	0.0948469	0.0866656	0.0907433	0.383	1.20395	0.954227	2.15817	37.7212	8.49777
4950	2699.22	0.094407	0.0863126	0.0924491	0.383	1.19734	0.95034	2.14768	38.4303	7.63819
5100	2699.22	0.0941287	0.0856006	0.0901494	0.383	1.1938	0.942501	2.1363	37.4743	7.49614
5250	2699.22	0.0927994	0.0849895	0.0860745	0.383	1.17333	0.935772	2.1091	35.7804	5.14219
0	2849.17	0.0978347	0.092918	0.0727003	0.383	1.24389	1.02307	2.26696	30.2209	12.0202
150	2849.17	0.0971223	0.0956164	0.0765425	0.383	1.22878	1.05278	2.28155	31.8181	7.59585
300	2849.17	0.072651	0.120683	0.0616356	0.383	0.830937	1.32878	2.15971	25.6214	5.51599e-06
450	2849.17	0.0964243	0.09647	0.098051	0.383	1.21642	1.06218	2.2786	40.7589	5.64604
600	2849.17	0.0732715	0.0867798	0.0659961	0.383	0.873707	0.955484	1.82919	27.434	0.000609448
750	2849.17	0.0946801	0.0913731	0.0842248	0.383	1.19516	1.00606	2.20122	35.0115	5.10366
900	2849.17	0.0974778	0.0902363	0.0919907	0.383	1.2417	0.993541	2.23524	38.2397	13.7431
1050	2849.17	0.0955639	0.0850891	0.0873009	0.383	1.21755	0.936869	2.15442	36.2902	12.4623
1200	2849.17	0.0946387	0.0837611	0.0985115	0.383	1.20437	0.922247	2.12662	40.9504	10.644
1350	2849.17	0.0946976	0.082908	0.0956144	0.383	1.20643	0.912854	2.11928	39.7461	11.8345
1500	2849.17	0.0944745	0.0801774	0.0818857	0.383	1.20637	0.882789	2.08916	34.0392	14.6689
1650	2849.17	0.0942265	0.0805981	0.0854083	0.383	1.20183	0.88742	2.08925	35.5035	12.976
1800	2849.17	0.095701	0.0848842	0.0988135	0.383	1.22003	0.934612	2.15465	41.0759	13.2728
1950	2849.17	0.0954706	0.0869964	0.0926187	0.383	1.21355	0.957869	2.17142	38.5008	10.0311
2100	2849.17	0.0957955	0.0880625	0.0850844	0.383	1.21739	0.969607	2.18699	35.3688	10.0222
2250	2849.17	0.0956296	0.0864851	0.0852003	0.383	1.21678	0.95224	2.16902	35.417	11.0858
2400	2849.17	0.0956984	0.0875062	0.0989142	0.383	1.21655	0.963482	2.18003	41.1178	10.2566
2550	2849.17	0.0959558	0.0865911	0.0913132	0.383	1.22191	0.953407	2.17531	37.9581	12.1484
2700	2849.17	0.0952818	0.0874692	0.0956252	0.383	1.20989	0.963074	2.17297	39.7506	9.02309
2850	2849.17	0.0949331	0.0846598	0.0805286	0.383	1.20794	0.932142	2.14008	33.475	10.6693
3000	2849.17	0.0969612	0.0850571	0.0775994	0.383	1.24022	0.936516	2.17673	32.2574	19.1765
3150	2849.17	0.0957573	0.0869243	0.0634622	0.383	1.21827	0.957075	2.17534	26.3807	11.0547
3300	2849.17	0.0134644	0.00530744	0.0270428	0.383	0.146936	0.0584372	0.205373	11.2414	1.77933e-20
3450	2849.17	0.0467685	-0.0189456	0.025461	0.383	0.581358	-0.208599	0.372759	10.5839	#NUM!
3600	2849.17	0.0578865	0.00772917	0.0434624	0.383	0.721294	0.0851016	0.806395	18.0669	11836.7
3750	2849.17	0.0928626	0.0834206	0.0796506	0.383	1.17633	0.918498	2.09483	33.1101	6.1873
3900	2849.17	0.0931808	0.083663	0.0821291	0.383	1.18111	0.921167	2.10228	34.1404	6.70359
4050	2849.17	0.0935678	0.0829768	0.082305	0.383	1.18818	0.913611	2.10179	34.2134	8.17732
4200	2849.17	0.0938257	0.0837866	0.0834121	0.383	1.19128	0.922528	2.11381	34.6737	8.17549
4350	2849.17	0.0938824	0.0833924	0.0836617	0.383	1.19269	0.918188	2.11088	34.7774	8.67382
4500	2849.17	0.0933083	0.085021	0.0828517	0.383	1.18141	0.936119	2.11753	34.4407	6.0746
4650	2849.17	0.0941086	0.0850896	0.0836731	0.383	1.19414	0.936874	2.13101	34.7822	7.84284
4800	2849.17	0.0943279	0.0859783	0.0865746	0.383	1.1965	0.94666	2.14316	35.9883	7.69831
4950	2849.17	0.093923	0.0861582	0.0890749	0.383	1.18978	0.94864	2.13843	37.0277	6.6259
5100	2849.17	0.093623	0.0855415	0.0918791	0.383	1.18578	0.94185	2.12763	38.1933	6.39084
5250	2849.17	0.0936086	0.0852325	0.0917251	0.383	1.18594	0.938448	2.12439	38.1293	6.56409
0	2999.13	0.0972291	0.091697	0.0700249	0.383	1.23572	1.00963	2.24535	29.1088	11.1456
150	2999.13	0.0986439	0.0902276	0.0747872	0.383	1.26066	0.993446	2.2541	31.0884	19.4943
300	2999.13	0.064852	0.0224105	0.0503683	0.383	0.81111	0.24675	1.05786	20.9377	27.349
450	2999.13	0.0976005	0.104097	0.102754	0.383	1.22514	1.14615	2.37129	42.7141	4.32593
600	2999.13	0.0977606	0.068054	0.0702663	0.383	1.27601	0.749304	2.02532	29.2091	144.16
750	2999.13	0.0966465	0.0833705	0.0886539	0.383	1.23734	0.917947	2.15529	36.8527	20.59
900	2999.13	0.093119	0.0908018	0.0885704	0.383	1.17101	0.999768	2.17078	36.8179	3.1934
1050	2999.13	0.0955706	0.0842994	0.0870385	0.383	1.21869	0.928174	2.14687	36.1812	13.5108
1200	2999.13	0.0950148	0.0839887	0.0924449	0.383	1.21013	0.924753	2.13489	38.4285	11.715
1350	2999.13	0.0949873	0.0816329	0.0901336	0.383	1.21276	0.898815	2.11157	37.4677	14.7826
1500	2999.13	0.0944707	0.0807743	0.0839827	0.383	1.20554	0.889361	2.0949	34.9109	13.7563
1650	2999.13	0.0946025	0.0815254	0.0930549	0.383	1.20669	0.897631	2.10432	38.6821	13.2528
1800	2999.13	0.0952676	0.0846412	0.0938781	0.383	1.21336	0.931937	2.14529	39.0243	11.8779
1950	2999.13	0.0953829	0.087213	0.0910826	0.383	1.21185	0.960254	2.17211	37.8622	9.55269
2100	2999.13	0.096077	0.0874395	0.0850756	0.383	1.22275	0.962747	2.18549	35.3652	11.6208
2250	2999.13	0.0957809	0.0871872	0.087039	0.383	1.2183	0.95997	2.17827	36.1814	10.8558
2400	2999.13	0.0959649	0.0868539	0.107965	0.383	1.22171	0.9563	2.17801	44.88	11.8758
2550	2999.13	0.0958581	0.0872729	0.0932249	0.383	1.21943	0.960914	2.18035	38.7528	11.0296
2700	2999.13	0.0957296	0.0866208	0.0840974	0.383	1.21822	0.953734	2.17195	34.9585	11.288
2850	2999.13	0.0952848	0.0847415	0.0770049	0.383	1.2135	0.933041	2.14654	32.0103	11.8225
3000	2999.13	0.082526	0.0890188	0.0609563	0.383	1.0087	0.980137	1.98884	25.339	0.05811
3150	2999.13	0.0385866	0.0628884	0.0252746	0.383	0.425128	0.692429	1.11756	10.5064	3.22558e-17
3300	2999.13	-0.0315018	-0.0654861	0.0405531	0.383	-0.323942	-0.721031	-1.04497	16.8576	#NUM!
3450	2999.13	0.052277	0.188862	0.0321007	0.383	0.511147	2.07946	2.5906	13.344	2.88379e-21
3600	2999.13	-0.0179592	0.138362	0.043672	0.383	-0.143146	1.52342	1.38028	18.1541	3.92908e-79
3750	2999.13	0.0913958	0.0824272	0.0802616	0.383	1.15423	0.90756	2.06179	33.364	4.18554
3900	2999.13	0.0932519	0.0833502	0.0815008	0.383	1.18265	0.917722	2.10037	33.8792	7.09094
4050	2999.13	0.0941544	0.0846793	0.0864547	0.383	1.1954	0.932357	2.12776	35.9385	8.29917
4200	2999.13	0.0936381	0.0824475	0.0844038	0.383	1.18999	0.907784	2.09777	35.0859	8.84308
4350	2999.13	0.0936987	0.0838494	0.0871341	0.383	1.18916	0.923219	2.11238	36.2209	7.79377
4500	2999.13	0.0937164	0.084001	0.0892329	0.383	1.18925	0.924888	2.11414	37.0933	7.71694
4650	2999.13	0.0941062	0.0848145	0.0851457	0.383	1.19445	0.933845	2.1283	35.3943	8.05891
4800	2999.13	0.094187	0.0846812	0.084609	0.383	1.19592	0.932378	2.1283	35.1712	8.38532
4950	2999.13	0.0938648	0.0858843	0.0839529	0.383	1.18921	0.945624	2.13483	34.8985	6.68288
5100	2999.13	0.0928615	0.0858891	0.0856718	0.383	1.17317	0.945677	2.11885	35.613	4.78524
5250	2999.13	0.0936107	0.0852573	0.0895866	0.383	1.18594	0.938721	2.12466	37.2404	6.5521
0	3149.09	0.0966273	0.0894524	0.07011	0.383	1.22898	0.984911	2.21389	29.1441	11.3865
150	3149.09	0.0976243	0.0935852	0.0740596	0.383	1.23959	1.03041	2.27	30.7859	10.6217
300	3149.09	0.0469402	0.0462824	0.0429874	0.383	0.541804	0.50959	1.05139	17.8695	2.85896e-09
450	3149.09	0.097439	0.102191	0.0951359	0.383	1.2251	1.12517	2.35027	39.5471	4.79938
600	3149.09	0.0527421	0.0437027	0.0698683	0.383	0.621526	0.481186	1.10271	29.0437	2.44587e-06
750	3149.09	0.0936073	0.0906963	0.0824674	0.383	1.17891	0.998607	2.17752	34.281	3.8088
900	3149.09	0.0952731	0.0895416	0.0864484	0.383	1.20704	0.985893	2.19294	35.9359	7.36694
1050	3149.09	0.0953204	0.0846514	0.0834889	0.383	1.2142	0.932049	2.14624	34.7056	12.0637
1200	3149.09	0.0945153	0.0832632	0.0892031	0.383	1.20303	0.916765	2.1198	37.081	10.7696
1350	3149.09	0.0939634	0.0805208	0.0864668	0.383	1.19769	0.886569	2.08426	35.9435	12.0348
1500	3149.09	0.0926566	0.0790225	0.0857183	0.383	1.17863	0.870073	2.0487	35.6323	9.28273
1650	3149.09	0.0928874	0.0805283	0.0928228	0.383	1.18041	0.886652	2.06706	38.5856	8.49347
1800	3149.09	0.094541	0.0839915	0.0898669	0.383	1.2025	0.924784	2.12728	37.3569	10.0786
1950	3149.09	0.0947875	0.085696	0.0920421	0.383	1.20425	0.943551	2.1478	38.2611	9.18111
2100	3149.09	0.0955928	0.0859843	0.0879117	0.383	1.21684	0.946725	2.16357	36.5441	11.5108
2250	3149.09	0.0951078	0.0860632	0.089992	0.383	1.20893	0.947593	2.15652	37.4089	9.80248
2400	3149.09	0.0941057	0.0858925	0.116912	0.383	1.19305	0.945715	2.13877	48.5994	7.22423
2550	3149.09	0.0937745	0.0859051	0.0968989	0.383	1.18773	0.945853	2.13359	40.28	6.47401
2700	3149.09	0.0945324	0.0843372	0.080393	0.383	1.20191	0.92859	2.1305	33.4187	9.70363
2850	3149.09	0.0935817	0.0834633	0.0762098	0.383	1.18778	0.918968	2.10675	31.6798	7.80817
3000	3149.09	0.0782467	0.0828604	0.0523035	0.383	0.95109	0.91233	1.86342	21.7421	0.0161919
3150	3149.09	0.0394076	0.0927422	0.00509298	0.383	0.419196	1.02113	1.44033	2.11711	6.18446e-22
3300	3149.09	-0.107786	-0.00753105	-0.00286841	0.383	-0.73016	-0.0829202	-0.81308	-1.19237	#NUM!
3450	3149.09	-0.0028615	-0.00418055	0.025512	0.383	-0.029937	-0.0460297	-0.0759668	10.6051	#NUM!
3600	3149.09	0.0429621	0.053615	0.0474355	0.383	0.485486	0.590325	1.07581	19.7185	1.23717e-12
3750	3149.09	0.0919864	0.091729	0.0870838	0.383	1.15189	1.00998	2.16186	36.2	1.96531
3900	3149.09	0.0920415	0.0917997	0.0846839	0.383	1.15267	1.01076	2.16343	35.2023	1.99017
4050	3149.09	0.0919794	0.0904284	0.0845694	0.383	1.15342	0.995656	2.14907	35.1548	2.23022
4200	3149.09	0.0917618	0.089211	0.0858391	0.383	1.15151	0.982253	2.13376	35.6826	2.33433
4350	3149.09	0.0922919	0.0838348	0.0899497	0.383	1.1667	0.923058	2.08976	37.3913	4.8896
4500	3149.09	0.0929949	0.0828246	0.0976348	0.383	1.17921	0.911936	2.09114	40.5859	6.88409
4650	3149.09	0.093292	0.0833803	0.0925294	0.383	1.18325	0.918054	2.1013	38.4637	7.16248
4800	3149.09	0.0931646	0.0831416	0.0890929	0.383	1.18152	0.915426	2.09694	37.0351	7.04197
4950	3149.09	0.0928094	0.0832992	0.0854085	0.383	1.17564	0.917161	2.0928	35.5036	6.15683
5100	3149.09	0.0929617	0.0848933	0.0836195	0.383	1.17604	0.934713	2.11075	34.7599	5.48427
5250	3149.09	0.0925843	0.083343	0.0852086	0.383	1.17199	0.917643	2.08963	35.4205	5.6841
0	3299.04	0.096505	0.0892529	0.0704695	0.383	1.22727	0.982714	2.20998	29.2936	11.1704
150	3299.04	0.0970721	0.0913571	0.0766368	0.383	1.23363	1.00588	2.23952	31.8572	10.9532
300	3299.04	0.0704176	0.113457	0.0405588	0.383	0.806772	1.24922	2.05599	16.8599	2.59532e-06
450	3299.04	0.0954043	0.0969418	0.0870854	0.383	1.19947	1.06737	2.26685	36.2006	3.8844
600	3299.04	0.0890461	0.0908829	0.0732243	0.383	1.10678	1.00066	2.10744	30.4387	0.724683
750	3299.04	0.0840219	0.0900177	0.0814237	0.383	1.03031	0.991135	2.02145	33.8471	0.101224
900	3299.04	0.0950596	0.0903682	0.0854851	0.383	1.20254	0.994994	2.19754	35.5354	6.35546
1050	3299.04	0.0946498	0.0842965	0.0832631	0.383	1.20385	0.928141	2.132	34.6117	10.1156
1200	3299.04	0.0943576	0.0824939	0.0884472	0.383	1.20149	0.908294	2.10978	36.7667	11.0892
1350	3299.04	0.0934479	0.0810202	0.0839936	0.383	1.18877	0.892069	2.08084	34.9154	9.67033
1500	3299.04	0.0933848	0.0793954	0.0851344	0.383	1.18984	0.874179	2.06401	35.3896	11.2871
1650	3299.04	0.0939862	0.0813957	0.0870552	0.383	1.19693	0.896203	2.09313	36.1881	11.0493
1800	3299.04	0.0944549	0.0836595	0.0848329	0.383	1.20155	0.921129	2.12267	35.2643	10.1438
1950	3299.04	0.0944469	0.0861144	0.0934645	0.383	1.19824	0.948157	2.1464	38.8524	7.89232
2100	3299.04	0.0949833	0.0865204	0.0923986	0.383	1.20633	0.952628	2.15896	38.4093	9.00493
2250	3299.04	0.0951955	0.0855717	0.0887053	0.383	1.21098	0.942183	2.15316	36.874	10.5817
2400	3299.04	0.093827	0.0872601	0.107041	0.383	1.18683	0.960772	2.1476	44.4959	5.74799
2550	3299.04	0.0946808	0.0855301	0.0963008	0.383	1.20275	0.941724	2.14448	40.0314	9.0216
2700	3299.04	0.0942738	0.0847762	0.0786137	0.383	1.19719	0.933424	2.13062	32.679	8.54086
2850	3299.04	0.0932133	0.084342	0.0782495	0.383	1.18076	0.928643	2.1094	32.5276	6.31389
3000	3299.04	0.0892206	0.0903929	0.0740228	0.383	1.11011	0.995266	2.10537	30.7706	0.815158
3150	3299.04	0.0792074	0.0689126	0.0714302	0.383	0.980621	0.758758	1.73938	29.6929	0.190046
3300	3299.04	0.0502092	-0.00624597	0.0565046	0.383	0.621533	-0.0687709	0.552762	23.4884	#NUM!
3450	3299.04	0.0212001	0.0386145	0.0418803	0.383	0.22751	0.425163	0.652673	17.4093	8.91295e-27
3600	3299.04	0.0791169	0.10589	0.0680127	0.383	0.939138	1.1659	2.10504	28.2723	0.00156849
3750	3299.04	0.0918559	0.0944567	0.0836894	0.383	1.14639	1.04001	2.1864	34.789	1.43814
3900	3299.04	0.0920857	0.0932041	0.0899337	0.383	1.15159	1.02622	2.17781	37.3847	1.76239
4050	3299.04	0.0927899	0.0923184	0.0939818	0.383	1.16385	1.01647	2.18032	39.0674	2.46
4200	3299.04	0.0921956	0.0947539	0.0938655	0.383	1.15137	1.04328	2.19465	39.0191	1.57876
4350	3299.04	0.0927333	0.0928301	0.0910644	0.383	1.16231	1.0221	2.18441	37.8547	2.29564
4500	3299.04	0.0933735	0.0861313	0.0947395	0.383	1.18103	0.948344	2.12938	39.3824	5.54129
4650	3299.04	0.0933581	0.0838519	0.0952659	0.383	1.1837	0.923247	2.10695	39.6012	6.96873
4800	3299.04	0.0932887	0.084759	0.0923227	0.383	1.18143	0.933234	2.11467	38.3777	6.20022
4950	3299.04	0.0929512	0.084057	0.0894425	0.383	1.17694	0.925505	2.10244	37.1805	5.96153
5100	3299.04	0.092913	0.0852152	0.0839523	0.383	1.17485	0.938257	2.11311	34.8983	5.2189
5250	3299.04	0.0929911	0.0854955	0.0869896	0.383	1.17574	0.941344	2.11708	36.1608	5.20459
0	3449	0.0969678	0.0905492	0.0703035	0.383	1.23302	0.996987	2.23001	29.2246	11.4235
150	3449	0.0974147	0.0955584	0.0796934	0.383	1.23357	1.05214	2.28571	33.1278	8.36561
300	3449	0.079307	0.0735974	0.0774915	0.383	0.977041	0.81034	1.78738	32.2125	0.0989609
450	3449	0.0933279	0.102256	0.0873531	0.383	1.15967	1.12588	2.28556	36.3119	1.19
600	3449	0.103924	0.0873994	0.0792662	0.383	1.3517	0.962306	2.314	32.9503	105.822
750	3449	0.0871568	0.0951307	0.0796128	0.383	1.07237	1.04743	2.1198	33.0943	0.220442
900	3449	0.0969909	0.0895426	0.0853401	0.383	1.23474	0.985904	2.22064	35.4751	12.6294
1050	3449	0.0958538	0.0863488	0.083264	0.383	1.22058	0.950739	2.17132	34.6121	12.0498
1200	3449	0.0958009	0.0844001	0.0876396	0.383	1.22228	0.929282	2.15157	36.431	14.3649
1350	3449	0.0941191	0.082124	0.0860147	0.383	1.19813	0.904222	2.10235	35.7555	10.6803
1500	3449	0.0941147	0.0815496	0.0844789	0.383	1.1988	0.897898	2.0967	35.1172	11.3269
1650	3449	0.0946068	0.0823811	0.0861867	0.383	1.20565	0.907053	2.1127	35.8271	12.1419
1800	3449	0.094575	0.0855634	0.0882133	0.383	1.20101	0.942091	2.1431	36.6695	8.69162
1950	3449	0.0958837	0.0864576	0.0904479	0.383	1.22092	0.951937	2.17285	37.5984	12.0342
2100	3449	0.096117	0.087444	0.0934114	0.383	1.22339	0.962797	2.18618	38.8303	11.7614
2250	3449	0.0955109	0.0865878	0.086039	0.383	1.21473	0.953371	2.1681	35.7657	10.5733
2400	3449	0.0955367	0.0868568	0.0936508	0.383	1.2148	0.956332	2.17113	38.9298	10.3827
2550	3449	0.0954503	0.0868864	0.0899341	0.383	1.21337	0.956658	2.17003	37.3848	10.0748
2700	3449	0.0952212	0.0854311	0.0765435	0.383	1.21158	0.940634	2.15221	31.8185	10.818
2850	3449	0.0946285	0.0847804	0.0713837	0.383	1.20288	0.93347	2.13635	29.6736	9.56666
3000	3449	0.0950166	0.0847	0.082944	0.383	1.20923	0.932585	2.14182	34.4791	10.9103
3150	3449	0.094649	0.0865363	0.0969478	0.383	1.20094	0.952804	2.15374	40.3003	8.07701
3300	3449	0.086712	0.0864472	0.0790224	0.383	1.07584	0.951821	2.02766	32.8489	0.469532
3450	3449	0.0600728	-0.0126743	0.0226252	0.383	0.770013	-0.13955	0.630463	9.4051	#NUM!
3600	3449	0.00527215	0.0631161	0.0266964	0.383	0.0518192	0.694936	0.746755	11.0975	1.55829e-87
3750	3449	0.0825532	0.101366	0.0606683	0.383	0.995143	1.11609	2.11123	25.2193	0.0147935
3900	3449	0.0919512	0.0961612	0.0840091	0.383	1.14574	1.05878	2.20452	34.9218	1.26493
4050	3449	0.0931201	0.0945532	0.0894456	0.383	1.16624	1.04107	2.20731	37.1817	2.22884
4200	3449	0.0922427	0.0965661	0.0924629	0.383	1.14982	1.06324	2.21306	38.436	1.35241
4350	3449	0.0922961	0.0957226	0.0899383	0.383	1.15173	1.05395	2.20568	37.3866	1.49253
4500	3449	0.0933892	0.0864289	0.0906673	0.383	1.1809	0.95162	2.13252	37.6896	5.40464
4650	3449	0.0929415	0.0842482	0.0867349	0.383	1.17654	0.92761	2.10415	36.0549	5.82493
4800	3449	0.0927898	0.0842705	0.0875711	0.383	1.17409	0.927855	2.10194	36.4026	5.52393
4950	3449	0.0933483	0.0843843	0.0874002	0.383	1.18286	0.929108	2.11197	36.3315	6.57321
5100	3449	0.0932652	0.0850522	0.0820354	0.383	1.18068	0.936463	2.11715	34.1014	5.96917
5250	3449	0.0933483	0.0854907	0.0823862	0.383	1.18145	0.941291	2.12274	34.2472	5.86614

## Sheet: P6BM
X (microns)	Y (microns)	A4520 (OH)	A5230 (H2Om)	A2350 (CO2)	thickness (mm)	[OH] wt%	[H2Om] wt%	[H2Ot] wt%	[CO2] ppm	Q (K/s)
0	0	0.0870169	0.0825005	0.0318119	0.357	1.17768	0.974522	2.1522	14.187	4.33539
120	0	0.0874635	0.0795006	0.0328418	0.357	1.18947	0.939087	2.12855	14.6463	7.02502
240	0	0.0887094	0.0754685	0.0380043	0.357	1.21658	0.891458	2.10804	16.9486	16.768
360	0	0.0884471	0.0731891	0.0431718	0.357	1.21521	0.864534	2.07975	19.2531	19.9018
480	0	0.0879759	0.072555	0.0447141	0.357	1.20792	0.857043	2.06497	19.9409	18.3221
600	0	0.0883953	0.0746813	0.0430568	0.357	1.21223	0.88216	2.09439	19.2019	16.5037
720	0	0.0877877	0.0758712	0.0332603	0.357	1.20007	0.896215	2.09628	14.833	11.7569
840	0	0.0896265	0.0777624	0.0336974	0.357	1.22928	0.918555	2.14784	15.0279	17.6423
960	0	0.0896136	0.0780599	0.0374411	0.357	1.22864	0.922069	2.1507	16.6974	17.0171
1080	0	0.0902898	0.0750635	0.0375961	0.357	1.24468	0.886675	2.13135	16.7666	29.2363
1200	0	0.0891194	0.0776719	0.0371671	0.357	1.2206	0.917486	2.13809	16.5753	15.0771
1320	0	0.0886319	0.0773733	0.0348917	0.357	1.21257	0.913958	2.12653	15.5605	13.2385
1440	0	0.0886754	0.0776374	0.0377267	0.357	1.21296	0.917079	2.13003	16.8248	13.0507
1560	0	0.0882892	0.0745166	0.0417622	0.357	1.21062	0.880214	2.09084	18.6245	16.2307
1680	0	0.0879458	0.0737123	0.0432027	0.357	1.2058	0.870714	2.07651	19.2669	15.8628
1800	0	0.0880373	0.0796446	0.0330418	0.357	1.19914	0.940788	2.13993	14.7355	8.44605
1920	0	0.0890593	0.0801474	0.0320397	0.357	1.21608	0.946727	2.16281	14.2886	11.3411
2040	0	0.0889139	0.0775723	0.0368949	0.357	1.21718	0.91631	2.13349	16.4539	14.2348
2160	0	0.0884163	0.0743386	0.0382412	0.357	1.21308	0.878112	2.09119	17.0543	17.2775
2280	0	0.0832283	0.0815175	0.0376512	0.357	1.11478	0.962911	2.0777	16.7912	1.14128
2400	0	0.0707971	0.0762964	0.0337876	0.357	0.918063	0.901238	1.8193	15.0681	0.00563724
0	120	0.0893138	0.0795375	0.0350718	0.357	1.22135	0.939523	2.16087	15.6408	13.1714
120	120	0.0895063	0.0793907	0.0324213	0.357	1.22489	0.937789	2.16268	14.4588	14.2596
240	120	0.0894782	0.0769694	0.0355119	0.357	1.22782	0.909188	2.13701	15.8371	18.3082
360	120	0.0893519	0.0775977	0.0389792	0.357	1.22474	0.91661	2.14135	17.3834	16.4113
480	120	0.089545	0.0750966	0.0405492	0.357	1.23163	0.887066	2.1187	18.0835	22.9661
600	120	0.0886045	0.0771683	0.0390584	0.357	1.21238	0.911538	2.12392	17.4187	13.4152
720	120	0.0897169	0.0803751	0.0334735	0.357	1.22715	0.949417	2.17657	14.928	13.7875
840	120	0.0892795	0.084837	0.0280097	0.357	1.21329	1.00212	2.21541	12.4914	7.54136
960	120	0.0899962	0.0784848	0.035463	0.357	1.23469	0.927087	2.16178	15.8153	18.4256
1080	120	0.089351	0.0777353	0.0414741	0.357	1.22453	0.918235	2.14277	18.496	16.1649
1200	120	0.0892699	0.0752062	0.0400413	0.357	1.22669	0.88836	2.11505	17.857	20.7539
1320	120	0.0878867	0.0753675	0.0354735	0.357	1.20248	0.890265	2.09274	15.82	12.8716
1440	120	0.0884341	0.0795075	0.0340393	0.357	1.20617	0.939169	2.14534	15.1804	9.82314
1560	120	0.0886374	0.0752653	0.0357554	0.357	1.21561	0.889058	2.10467	15.9457	16.7485
1680	120	0.0878784	0.0759863	0.0389229	0.357	1.20147	0.897575	2.09905	17.3583	11.9694
1800	120	0.0886649	0.0765273	0.0357815	0.357	1.21433	0.903965	2.11829	15.9573	14.6901
1920	120	0.0898703	0.0797076	0.0309898	0.357	1.23076	0.941532	2.1723	13.8204	15.5484
2040	120	0.088018	0.0760044	0.0345041	0.357	1.20386	0.897789	2.10165	15.3876	12.5254
2160	120	0.0884801	0.0747019	0.0400921	0.357	1.21367	0.882403	2.09608	17.8797	16.9362
2280	120	0.08875	0.0769501	0.0393008	0.357	1.21521	0.90896	2.12417	17.5268	14.4257
2400	120	0.088263	0.0777723	0.0329799	0.357	1.20564	0.918672	2.12431	14.7079	11.1875
0	240	0.0880001	0.0812069	0.0331909	0.357	1.19633	0.959242	2.15557	14.802	7.05281
120	240	0.090821	0.0801814	0.0255848	0.357	1.24664	0.947128	2.19377	11.4099	20.1398
240	240	0.0897858	0.0796606	0.0304252	0.357	1.22936	0.940977	2.17034	13.5686	15.1978
360	240	0.0894923	0.0815371	0.0326118	0.357	1.22162	0.963142	2.18476	14.5438	11.3415
480	240	0.0894189	0.0797384	0.0353662	0.357	1.22289	0.941896	2.16478	15.7721	13.3536
600	240	0.0889014	0.0777347	0.0346913	0.357	1.21673	0.918227	2.13496	15.4711	13.9278
720	240	0.0881971	0.0781764	0.0255741	0.357	1.20394	0.923445	2.12738	11.4052	10.4657
840	240	0.0891303	0.0860263	0.0194925	0.357	1.20904	1.01617	2.22521	8.69299	6.362
960	240	0.0879652	0.0818458	0.0305456	0.357	1.19484	0.966789	2.16163	13.6223	6.51103
1080	240	0.088661	0.0800031	0.0366343	0.357	1.2094	0.945022	2.15442	16.3377	10.0648
1200	240	0.0891003	0.0781841	0.0351206	0.357	1.21955	0.923536	2.14309	15.6626	14.1757
1320	240	0.0896651	0.0779846	0.0333594	0.357	1.22964	0.921179	2.15082	14.8772	17.446
1440	240	0.0899288	0.0811211	0.027419	0.357	1.22977	0.958229	2.188	12.2279	13.686
1560	240	0.0903199	0.0797758	0.0307318	0.357	1.23849	0.942338	2.18082	13.7053	17.8733
1680	240	0.0890335	0.0770455	0.0347935	0.357	1.21999	0.910087	2.13008	15.5167	15.6869
1800	240	0.0897133	0.0770625	0.0355367	0.357	1.23178	0.910287	2.14207	15.8481	19.5676
1920	240	0.0892956	0.0780105	0.0330898	0.357	1.22318	0.921485	2.14467	14.7569	15.4087
2040	240	0.0893711	0.0780866	0.0318386	0.357	1.22438	0.922385	2.14677	14.1989	15.6687
2160	240	0.088255	0.0783986	0.0337031	0.357	1.20463	0.92607	2.1307	15.0304	10.4187
2280	240	0.088217	0.0774397	0.0359645	0.357	1.2053	0.914743	2.12005	16.0389	11.4242
2400	240	0.0880045	0.0800035	0.0332099	0.357	1.19808	0.945027	2.1431	14.8105	8.03396
0	360	0.0893847	0.0870018	0.0269039	0.357	1.21205	1.02769	2.23974	11.9982	6.30809
120	360	0.0884577	0.0793081	0.0176964	0.357	1.20686	0.936813	2.14367	7.89198	10.1171
240	360	0.0924237	0.0829525	0.0137443	0.357	1.27066	0.979862	2.25053	6.12948	25.2966
360	360	0.0889251	0.0832911	0.0271691	0.357	1.20935	0.983861	2.19321	12.1165	7.81285
480	360	0.0899385	0.0790954	0.033974	0.357	1.23282	0.934301	2.16712	15.1512	16.9542
600	360	0.0895464	0.0775773	0.0323602	0.357	1.22815	0.916368	2.14452	14.4316	17.5313
720	360	0.0910969	0.0807833	0.0293688	0.357	1.25059	0.954238	2.20483	13.0975	20.6831
840	360	0.0909165	0.0792488	0.0263902	0.357	1.24965	0.936112	2.18576	11.7691	22.8555
960	360	0.0904591	0.0839167	0.0290303	0.357	1.235	0.991251	2.22625	12.9465	12.2831
1080	360	0.0876949	0.0788849	0.0298387	0.357	1.1943	0.931815	2.12611	13.307	8.14672
1200	360	0.090165	0.0791332	0.0347559	0.357	1.2367	0.934747	2.17145	15.4999	18.1776
1320	360	0.0889303	0.0763591	0.0307849	0.357	1.21917	0.901978	2.12114	13.729	16.3448
1440	360	0.0903876	0.0809176	0.0266422	0.357	1.23804	0.955825	2.19386	11.8815	16.24
1560	360	0.0845476	0.0755513	0.0200474	0.357	1.14498	0.892436	2.03742	8.94044	3.8308
1680	360	0.089586	0.0785098	0.0316514	0.357	1.22752	0.927384	2.1549	14.1155	16.0729
1800	360	0.0898638	0.0790003	0.033322	0.357	1.23165	0.933178	2.16483	14.8605	16.7122
1920	360	0.0896646	0.0775283	0.0326234	0.357	1.23027	0.915789	2.14606	14.5489	18.3177
2040	360	0.0897079	0.0763623	0.0346128	0.357	1.23268	0.902016	2.13469	15.4361	21.0718
2160	360	0.0882731	0.0756298	0.0369482	0.357	1.20879	0.893364	2.10216	16.4776	14.2376
2280	360	0.0891085	0.0734932	0.0387278	0.357	1.22629	0.868126	2.09441	17.2713	23.8603
2400	360	0.0890319	0.0758378	0.0394667	0.357	1.22166	0.895821	2.11748	17.6008	17.9026
0	480	0.0883371	0.083443	0.0192599	0.357	1.19901	0.985656	2.18467	8.58927	6.27541
120	480	0.0912066	0.0785398	0.0133983	0.357	1.25574	0.927737	2.18347	5.97518	26.9532
240	480	0.0859122	0.0901014	0.00820607	0.357	1.14854	1.06431	2.21285	3.65963	1.30511
360	480	0.0896634	0.0830995	0.0251288	0.357	1.22237	0.981599	2.20397	11.2066	10.2346
480	480	0.0887679	0.0787393	0.0324283	0.357	1.21302	0.930094	2.14311	14.4619	11.9477
600	480	0.0883652	0.0800981	0.031162	0.357	1.20416	0.946144	2.1503	13.8972	9.00578
720	480	0.0882422	0.0773052	0.0340342	0.357	1.20593	0.913155	2.11908	15.1781	11.6944
840	480	0.0901316	0.0803142	0.0316222	0.357	1.23444	0.948697	2.18314	14.1024	15.8991
960	480	0.0884371	0.0823076	0.020687	0.357	1.20232	0.972244	2.17456	9.22571	7.31059
1080	480	0.0877296	0.0891119	0.0270244	0.357	1.18074	1.05262	2.23335	12.052	2.85007
1200	480	0.0889178	0.0788839	0.0343201	0.357	1.2154	0.931803	2.14721	15.3056	12.3708
1320	480	0.0885587	0.0766237	0.0352419	0.357	1.21235	0.905104	2.11746	15.7167	14.0277
1440	480	0.0887559	0.0759839	0.034035	0.357	1.21667	0.897546	2.11421	15.1784	16.0803
1560	480	0.0898053	0.0794235	0.0294856	0.357	1.23004	0.938176	2.16821	13.1496	15.6812
1680	480	0.0882096	0.0815642	0.0279857	0.357	1.19944	0.963462	2.1629	12.4807	7.3044
1800	480	0.0880039	0.0787606	0.0283033	0.357	1.19979	0.930345	2.13014	12.6223	9.18998
1920	480	0.088969	0.0793878	0.0352223	0.357	1.21558	0.937754	2.15334	15.7079	11.9253
2040	480	0.0883764	0.0726906	0.040356	0.357	1.21468	0.858645	2.07333	17.9974	20.5936
2160	480	0.08743	0.0738744	0.0387806	0.357	1.19665	0.872629	2.06928	17.2948	13.0766
2280	480	0.0879047	0.0713328	0.0398046	0.357	1.20838	0.842606	2.05099	17.7515	20.6551
2400	480	0.0879606	0.074091	0.0419879	0.357	1.20553	0.875187	2.08071	18.7252	15.263
0	600	0.0881332	0.0862918	0.019431	0.357	1.19155	1.01931	2.21085	8.66555	4.36679
120	600	0.0923144	0.0846664	0.0239023	0.357	1.26625	1.00011	2.26636	10.6596	20.7255
240	600	0.0911404	0.0808534	0.0254685	0.357	1.25125	0.955066	2.20632	11.3581	20.8227
360	600	0.088266	0.079428	0.0312302	0.357	1.20338	0.938229	2.14161	13.9276	9.35387
480	600	0.0911009	0.0777329	0.0341378	0.357	1.25505	0.918206	2.17325	15.2243	28.3619
600	600	0.0883225	0.07699	0.0358079	0.357	1.20775	0.909431	2.11719	15.9691	12.4422
720	600	0.0888502	0.0755645	0.0354368	0.357	1.21889	0.892592	2.11148	15.8036	17.3806
840	600	0.0886718	0.0773462	0.0318339	0.357	1.2133	0.913638	2.12694	14.1968	13.4567
960	600	0.0780436	0.0778364	0.0156273	0.357	1.0333	0.919429	1.95273	6.96922	0.191862
1080	600	0.091945	0.0912396	0.014603	0.357	1.25026	1.07775	2.32801	6.51245	9.99757
1200	600	0.0897194	0.0869658	0.0245148	0.357	1.21787	1.02727	2.24514	10.9328	7.1003
1320	600	0.0892284	0.0774558	0.0311244	0.357	1.2228	0.914933	2.13773	13.8804	16.0007
1440	600	0.0892007	0.0761744	0.036867	0.357	1.22412	0.899796	2.12392	16.4414	18.2339
1560	600	0.0895822	0.0785336	0.0300511	0.357	1.22742	0.927664	2.15508	13.4018	16.0124
1680	600	0.0909574	0.0876219	0.0198476	0.357	1.23834	1.03502	2.27336	8.85133	10.102
1800	600	0.0891206	0.0816704	0.0362305	0.357	1.215	0.964718	2.17972	16.1575	9.87076
1920	600	0.0895645	0.076842	0.0430304	0.357	1.2295	0.907683	2.13719	19.1901	19.093
2040	600	0.0884262	0.0744637	0.0445752	0.357	1.21307	0.87959	2.09266	19.879	17.0899
2160	600	0.0890454	0.0760245	0.0422881	0.357	1.22163	0.898026	2.11966	18.859	17.6152
2280	600	0.0898268	0.0771312	0.0407678	0.357	1.23366	0.911099	2.14476	18.181	20.1514
2400	600	0.0886064	0.0765087	0.0430374	0.357	1.21334	0.903746	2.11708	19.1932	14.4353
0	720	0.0890452	0.0842335	0.0295522	0.357	1.21009	0.994993	2.20509	13.1793	7.39593
120	720	0.0911373	0.0816831	0.0319445	0.357	1.25	0.964867	2.21487	14.2462	19.1312
240	720	0.0905333	0.079454	0.0318945	0.357	1.24266	0.938536	2.1812	14.2239	19.7978
360	720	0.0905415	0.0812617	0.0354517	0.357	1.24022	0.959889	2.20011	15.8102	16.4819
480	720	0.0914689	0.0792488	0.0356014	0.357	1.25931	0.936113	2.19542	15.877	27.1971
600	720	0.088796	0.0783271	0.0333904	0.357	1.21408	0.925225	2.1393	14.891	12.6095
720	720	0.0901163	0.0807811	0.0333422	0.357	1.23351	0.954212	2.18773	14.8695	15.0749
840	720	0.0898303	0.0850975	0.0265903	0.357	1.22243	1.0052	2.22763	11.8583	8.85958
960	720	0.0901263	0.0824922	0.0226234	0.357	1.23125	0.974425	2.20568	10.0892	12.6973
1080	720	0.0894383	0.0850845	0.025117	0.357	1.21568	1.00505	2.22072	11.2013	7.76686
1200	720	0.089289	0.0808434	0.0272679	0.357	1.21908	0.954948	2.17402	12.1606	11.3868
1320	720	0.088941	0.0769803	0.0339071	0.357	1.21848	0.909316	2.12779	15.1214	15.3216
1440	720	0.0890441	0.0753473	0.0393093	0.357	1.22256	0.890026	2.11259	17.5306	18.9785
1560	720	0.0907597	0.0806582	0.0348287	0.357	1.24489	0.952761	2.19765	15.5324	18.8074
1680	720	0.0910135	0.0822396	0.0271693	0.357	1.24704	0.971441	2.21849	12.1166	17.3891
1800	720	0.0907484	0.0800202	0.0342027	0.357	1.24561	0.945224	2.19083	15.2532	20.0062
1920	720	0.0895336	0.0763526	0.0402577	0.357	1.22966	0.901901	2.13156	17.9535	19.935
2040	720	0.0887708	0.0743224	0.0402809	0.357	1.21925	0.87792	2.09717	17.9639	19.4594
2160	720	0.0902416	0.0771371	0.0392167	0.357	1.24088	0.911168	2.15205	17.4893	23.0143
2280	720	0.0894361	0.0783599	0.0333454	0.357	1.22513	0.925613	2.15074	14.8709	15.5462
2400	720	0.0898925	0.0787238	0.0371679	0.357	1.23254	0.929911	2.16246	16.5756	17.3695
0	840	0.0904175	0.0809836	0.0326592	0.357	1.23846	0.956604	2.19507	14.5649	16.2878
120	840	0.0895916	0.0774484	0.0331375	0.357	1.22912	0.914846	2.14396	14.7782	18.0406
240	840	0.0894558	0.0759579	0.0361441	0.357	1.22886	0.89724	2.1261	16.119	20.2943
360	840	0.0893455	0.077282	0.0357879	0.357	1.22508	0.91288	2.13796	15.9602	16.9459
480	840	0.0905017	0.0800308	0.031242	0.357	1.24129	0.94535	2.18664	13.9329	18.4609
600	840	0.0890741	0.0814085	0.025925	0.357	1.21456	0.961624	2.17619	11.5617	9.98522
720	840	0.090849	0.0815781	0.0283475	0.357	1.24513	0.963627	2.20875	12.642	17.6279
840	840	0.0904872	0.0828734	0.0300038	0.357	1.23698	0.978928	2.21591	13.3807	13.7577
960	840	0.0905463	0.0817225	0.0281624	0.357	1.23965	0.965333	2.20498	12.5595	15.7519
1080	840	0.0881674	0.0801251	0.0301294	0.357	1.20071	0.946464	2.14718	13.4367	8.38923
1200	840	0.0886245	0.0800426	0.0317553	0.357	1.20871	0.945489	2.1542	14.1618	9.89863
1320	840	0.0895383	0.076415	0.0416991	0.357	1.22965	0.902639	2.13229	18.5964	19.83
1440	840	0.0890049	0.0748135	0.0411736	0.357	1.22263	0.883721	2.10635	18.362	19.8849
1560	840	0.0902713	0.0808414	0.0359356	0.357	1.23612	0.954925	2.19105	16.026	15.7593
1680	840	0.0920275	0.0843363	0.028912	0.357	1.26172	0.996207	2.25792	12.8938	19.5469
1800	840	0.0898548	0.0793126	0.0367922	0.357	1.23105	0.936866	2.16792	16.408	16.1242
1920	840	0.0887841	0.0755766	0.038753	0.357	1.21772	0.892735	2.11046	17.2825	16.982
2040	840	0.0887815	0.0758612	0.040256	0.357	1.21728	0.896097	2.11338	17.9528	16.4395
2160	840	0.0913886	0.0799244	0.032147	0.357	1.25693	0.944092	2.20102	14.3365	24.7526
2280	840	0.0931001	0.0850803	0.0263483	0.357	1.27942	1.005	2.28441	11.7504	25.4321
2400	840	0.0901587	0.0790543	0.0318998	0.357	1.23671	0.933815	2.17052	14.2262	18.2915
0	960	0.090085	0.0802235	0.0326222	0.357	1.23376	0.947626	2.18139	14.5484	15.8071
120	960	0.0890359	0.0774883	0.0369675	0.357	1.21941	0.915317	2.13473	16.4862	14.9603
240	960	0.0888841	0.0777386	0.0349055	0.357	1.21643	0.918274	2.1347	15.5667	13.8418
360	960	0.0899619	0.0782881	0.0334622	0.357	1.23437	0.924764	2.15913	14.923	18.6051
480	960	0.0905067	0.080592	0.0242387	0.357	1.24057	0.951979	2.19255	10.8096	17.4525
600	960	0.085185	0.0885296	0.0173865	0.357	1.13839	1.04574	2.18413	7.75378	1.15476
720	960	0.0906773	0.0837854	0.023539	0.357	1.23898	0.989701	2.22868	10.4976	13.3676
840	960	0.0852987	0.0823246	0.0225567	0.357	1.14866	0.972444	2.12111	10.0595	2.33929
960	960	0.0888975	0.0833266	0.0271334	0.357	1.20882	0.984281	2.1931	12.1006	7.71084
1080	960	0.0917225	0.0833205	0.0269574	0.357	1.25786	0.984208	2.24207	12.0221	19.5912
1200	960	0.0898529	0.0824419	0.0300547	0.357	1.22658	0.97383	2.20041	13.4034	11.6572
1320	960	0.0900292	0.0787627	0.0373749	0.357	1.23487	0.930371	2.16524	16.6679	18.0851
1440	960	0.0887669	0.0840017	0.0325412	0.357	1.20563	0.992255	2.19788	14.5123	6.87985
1560	960	0.0591962	0.0989461	0.0160295	0.357	0.718345	1.16878	1.88713	7.1486	2.48821e-08
1680	960	0.0898298	0.0866406	0.0276738	0.357	1.22023	1.02343	2.24366	12.3416	7.60983
1800	960	0.0894376	0.0797244	0.0378258	0.357	1.22323	0.94173	2.16496	16.869	13.4563
1920	960	0.0891019	0.0767073	0.040664	0.357	1.22165	0.906092	2.12775	18.1348	16.6495
2040	960	0.0887539	0.0805268	0.0335279	0.357	1.21027	0.951209	2.16148	14.9523	9.82632
2160	960	0.0892559	0.0833417	0.0268062	0.357	1.21498	0.984459	2.19944	11.9547	8.70174
2280	960	0.0880301	0.0817384	0.020241	0.357	1.19611	0.965521	2.16163	9.0268	6.73663
2400	960	0.0910751	0.0802061	0.0281561	0.357	1.25104	0.94742	2.19846	12.5567	21.7832
0	1080	0.0899569	0.0804646	0.0353784	0.357	1.23119	0.950474	2.18167	15.7776	14.7831
120	1080	0.0883006	0.0762302	0.0373089	0.357	1.20844	0.900456	2.10889	16.6385	13.4372
240	1080	0.0888197	0.078851	0.0358792	0.357	1.21375	0.931413	2.14517	16.0009	12.0123
360	1080	0.0884343	0.0809409	0.0338519	0.357	1.20418	0.9561	2.16028	15.0968	8.43161
480	1080	0.0875343	0.0793835	0.0295381	0.357	1.19085	0.937704	2.12855	13.173	7.2944
600	1080	0.0907407	0.083153	0.0292963	0.357	1.24098	0.98223	2.22321	13.0651	14.5324
720	1080	0.0896594	0.0824524	0.0236621	0.357	1.22322	0.973955	2.19717	10.5525	10.9169
840	1080	0.0888814	0.0835179	0.0238068	0.357	1.20828	0.98654	2.19482	10.617	7.51969
960	1080	0.0916772	0.0852205	0.0230682	0.357	1.25432	1.00665	2.26097	10.2876	16.0595
1080	1080	0.0911094	0.0874382	0.0227034	0.357	1.24124	1.03285	2.27409	10.1249	10.808
1200	1080	0.0876744	0.0827858	0.0232217	0.357	1.18855	0.977893	2.16644	10.3561	5.32239
1320	1080	0.0898325	0.0880427	0.0257874	0.357	1.21829	1.03999	2.25828	11.5003	6.64833
1440	1080	0.0560372	0.07836	0.00560772	0.357	0.690962	0.925613	1.61658	2.50085	5.57138e-08
1560	1080	0.00205386	0.0049026	0.00188172	0.357	0.0231644	0.0579111	0.0810755	0.839182	1.56628e-83
1680	1080	0.037961	0.0739685	0.00928986	0.357	0.442601	0.87374	1.31634	4.14296	1.74949e-18
1800	1080	0.0897648	0.0810411	0.0321779	0.357	1.22704	0.957284	2.18433	14.3503	13.0717
1920	1080	0.0926183	0.0809722	0.0367079	0.357	1.27697	0.95647	2.23344	16.3704	32.6086
2040	1080	0.0862065	0.0813354	0.0271133	0.357	1.16544	0.96076	2.1262	12.0916	3.65971
2160	1080	0.0862479	0.0975963	0.0245054	0.357	1.14401	1.15284	2.29685	10.9286	0.719315
2280	1080	0.0890548	0.0865259	0.0283058	0.357	1.20704	1.02207	2.22911	12.6234	5.89805
2400	1080	0.0892017	0.0818263	0.0312348	0.357	1.21618	0.966559	2.18274	13.9296	9.98242
0	1200	0.0886891	0.0783502	0.0392333	0.357	1.2122	0.925498	2.13769	17.4967	12.1338
120	1200	0.0896526	0.0787702	0.0396282	0.357	1.22831	0.930459	2.15877	17.6728	15.98
240	1200	0.0904877	0.0790988	0.0360444	0.357	1.24237	0.934341	2.17672	16.0746	20.2439
360	1200	0.0897254	0.0814603	0.0319454	0.357	1.22576	0.962236	2.188	14.2465	12.3552
480	1200	0.090477	0.0872686	0.0280424	0.357	1.23053	1.03085	2.26137	12.506	8.90633
600	1200	0.0908734	0.0805417	0.0304073	0.357	1.24704	0.951385	2.19842	13.5606	19.7389
720	1200	0.0889308	0.0832313	0.0279431	0.357	1.20953	0.983155	2.19269	12.4617	7.87616
840	1200	0.0902049	0.0847389	0.0266202	0.357	1.22942	1.00096	2.23038	11.8717	10.4076
960	1200	0.0868684	0.0851979	0.0178752	0.357	1.17145	1.00638	2.17783	7.97175	3.09137
1080	1200	0.0917752	0.0821722	0.0268536	0.357	1.26044	0.970645	2.23109	11.9758	22.3031
1200	1200	0.0880023	0.0854008	0.0265305	0.357	1.19054	1.00878	2.19932	11.8317	4.56184
1320	1200	0.0797801	0.0916624	0.0149335	0.357	1.04456	1.08275	2.12731	6.65982	0.081598
1440	1200	0.00990319	0.051849	-0.00932908	0.357	0.107541	0.612457	0.719998	-4.16045	1.22267e-54
1560	1200	0.00226611	0.00466025	-0.00352067	0.357	0.0255866	0.0550484	0.080635	-1.5701	2.62723e-89
1680	1200	0.0297406	0.0856311	0.0100718	0.357	0.33127	1.0115	1.34277	4.49165	2.51991e-30
1800	1200	0.0889387	0.0853947	0.0373042	0.357	1.20663	1.00871	2.21534	16.6364	6.34153
1920	1200	0.0907934	0.0788221	0.0393402	0.357	1.24811	0.931073	2.17918	17.5444	22.9732
2040	1200	0.0916287	0.0801163	0.0309183	0.357	1.26085	0.94636	2.20721	13.7885	26.1706
2160	1200	0.09278	0.0866657	0.0311401	0.357	1.27148	1.02372	2.2952	13.8874	19.8542
2280	1200	0.0922459	0.0827551	0.0332223	0.357	1.26784	0.977531	2.24537	14.816	24.4021
2400	1200	0.0909554	0.0804556	0.0304026	0.357	1.24859	0.950368	2.19896	13.5585	20.4417
0	1320	0.0912546	0.0801034	0.0365048	0.357	1.25433	0.946207	2.20053	16.2799	23.3004
120	1320	0.0906618	0.0810211	0.0345497	0.357	1.24266	0.957047	2.19971	15.408	17.5613
240	1320	0.0904093	0.0822886	0.0307409	0.357	1.23646	0.972019	2.20848	13.7094	14.225
360	1320	0.088815	0.0817684	0.0237463	0.357	1.20958	0.965875	2.17546	10.59	8.80658
480	1320	0.0887699	0.0851695	0.0259984	0.357	1.20404	1.00605	2.21009	11.5944	6.11773
600	1320	0.0915534	0.079876	0.0341284	0.357	1.25988	0.943521	2.2034	15.2201	26.1935
720	1320	0.0900967	0.0781367	0.0340481	0.357	1.23693	0.922976	2.15991	15.1843	19.7493
840	1320	0.0914514	0.0815918	0.0324504	0.357	1.25562	0.963789	2.21941	14.4718	21.3345
960	1320	0.0909584	0.0805238	0.0281633	0.357	1.24855	0.951174	2.19972	12.5599	20.3193
1080	1320	0.0897543	0.0808649	0.0320459	0.357	1.22711	0.955203	2.18231	14.2914	13.2661
1200	1320	0.0910741	0.0814752	0.035681	0.357	1.2492	0.962412	2.21161	15.9125	19.1452
1320	1320	0.0867758	0.0906999	0.0350525	0.357	1.16234	1.07138	2.23371	15.6322	1.71003
1440	1320	0.0357555	0.0826492	0.0199619	0.357	0.408759	0.976279	1.38504	8.90234	3.30016e-22
1560	1320	-0.00202215	0.0574269	0.00873911	0.357	-0.0207932	0.678345	0.657552	3.89734	2.14087e-115
1680	1320	0.0683101	0.0834203	0.0250164	0.357	0.871175	0.985388	1.85656	11.1565	0.000418358
1800	1320	0.0906421	0.0786239	0.0366271	0.357	1.24575	0.928732	2.17448	16.3344	22.3509
1920	1320	0.0890781	0.0765296	0.0355863	0.357	1.22149	0.903992	2.12548	15.8703	16.8438
2040	1320	0.0917312	0.079293	0.0280277	0.357	1.26384	0.936635	2.20048	12.4994	29.3782
2160	1320	0.0909879	0.0818568	0.0315978	0.357	1.24715	0.966919	2.21407	14.0915	17.9224
2280	1320	0.0909147	0.0802832	0.0365839	0.357	1.24813	0.948331	2.19646	16.3152	20.5364
2400	1320	0.0890846	0.0794684	0.0297216	0.357	1.21747	0.938706	2.15618	13.2548	12.291
0	1440	0.0900558	0.0932347	0.0217552	0.357	1.21477	1.10132	2.31608	9.70205	4.41286
120	1440	0.0918777	0.0866903	0.0238873	0.357	1.25569	1.02401	2.2797	10.6529	14.8874
240	1440	0.0887952	0.0902705	0.0182456	0.357	1.19733	1.0663	2.26363	8.13693	3.73802
360	1440	0.0933982	0.0841097	0.0187035	0.357	1.28609	0.993531	2.27962	8.34113	30.5262
480	1440	0.0894106	0.081919	0.0246771	0.357	1.21966	0.967654	2.18732	11.0051	10.6083
600	1440	0.0907957	0.0792089	0.0361247	0.357	1.24759	0.935642	2.18323	16.1104	22.0848
720	1440	0.0903906	0.0775737	0.0404679	0.357	1.24286	0.916326	2.15918	18.0473	23.0402
840	1440	0.0910434	0.0825214	0.0340741	0.357	1.24716	0.974769	2.22193	15.1959	17.0697
960	1440	0.0942161	0.0817603	0.0260416	0.357	1.304	0.965779	2.26978	11.6137	48.7015
1080	1440	0.0918614	0.083778	0.0327645	0.357	1.25962	0.989613	2.24924	14.6118	19.5774
1200	1440	0.0906467	0.0812481	0.0367073	0.357	1.24207	0.959729	2.2018	16.3702	17.0764
1320	1440	0.0868479	0.0784452	0.0351203	0.357	1.18035	0.92662	2.10697	15.6625	6.34999
1440	1440	0.0873161	0.0840593	0.0329377	0.357	1.18065	0.992935	2.17359	14.6891	4.09704
1560	1440	0.091304	0.0833538	0.0357115	0.357	1.25051	0.984603	2.23511	15.9261	17.0888
1680	1440	0.0901189	0.0781947	0.041275	0.357	1.23724	0.923661	2.1609	18.4072	19.7698
1800	1440	0.0891335	0.0772366	0.0412995	0.357	1.22146	0.912344	2.1338	18.4182	15.88
1920	1440	0.090057	0.0789302	0.0342885	0.357	1.23511	0.932349	2.16746	15.2915	17.9299
2040	1440	0.0910332	0.0827522	0.0331331	0.357	1.24665	0.977496	2.22415	14.7762	16.6267
2160	1440	0.0896655	0.0802466	0.0344674	0.357	1.22644	0.947899	2.17434	15.3713	13.7381
2280	1440	0.0906499	0.0786746	0.039001	0.357	1.24581	0.92933	2.17514	17.3931	22.2878
2400	1440	0.0903729	0.0815941	0.0340312	0.357	1.23682	0.963816	2.20063	15.1767	15.0827
0	1560	0.0916565	0.0829052	0.0310942	0.357	1.25731	0.979303	2.23661	13.8669	19.9841
120	1560	0.092634	0.0819402	0.0264704	0.357	1.27583	0.967904	2.24374	11.8049	29.7903
240	1560	0.0820083	0.0842397	0.0155682	0.357	1.09082	0.995067	2.08589	6.94288	0.505554
360	1560	0.0842296	0.0705077	0.0175923	0.357	1.14628	0.832859	1.97914	7.84557	6.33726
480	1560	0.0866618	0.0900029	0.0177784	0.357	1.16136	1.06314	2.2245	7.92856	1.75514
600	1560	0.0882584	0.081627	0.0341042	0.357	1.20019	0.964204	2.16439	15.2093	7.38
720	1560	0.0901957	0.0788678	0.0416744	0.357	1.23762	0.931612	2.16923	18.5853	18.8775
840	1560	0.0911187	0.0812239	0.037188	0.357	1.25034	0.959443	2.20978	16.5846	19.9189
960	1560	0.0930937	0.0809513	0.0305136	0.357	1.28537	0.956223	2.24159	13.608	37.7403
1080	1560	0.090312	0.0840726	0.0311435	0.357	1.23222	0.993093	2.22532	13.8889	11.5208
1200	1560	0.0896016	0.0785278	0.0396338	0.357	1.22777	0.927596	2.15536	17.6753	16.125
1320	1560	0.0890417	0.0752618	0.0403578	0.357	1.22264	0.889016	2.11166	17.9982	19.1446
1440	1560	0.088447	0.0768343	0.0424985	0.357	1.21012	0.907591	2.11772	18.9529	13.2005
1560	1560	0.0889162	0.0754935	0.0461011	0.357	1.22013	0.891754	2.11189	20.5595	17.9038
1680	1560	0.0881861	0.074444	0.0434771	0.357	1.20894	0.879357	2.0883	19.3893	15.8109
1800	1560	0.0901581	0.0766344	0.0400392	0.357	1.24014	0.90523	2.14537	17.8561	23.6492
1920	1560	0.0908702	0.0801702	0.0365331	0.357	1.24751	0.946996	2.19451	16.2925	20.4826
2040	1560	0.0896613	0.0801989	0.0353787	0.357	1.22644	0.947335	2.17377	15.7777	13.7875
2160	1560	0.0894757	0.0803212	0.0361067	0.357	1.22305	0.94878	2.17183	16.1023	12.7996
2280	1560	0.090513	0.0786878	0.0368981	0.357	1.2434	0.929486	2.17289	16.4553	21.305
2400	1560	0.0901812	0.079373	0.0343252	0.357	1.23665	0.93758	2.17422	15.3079	17.8204
0	1680	0.0894614	0.0826923	0.0332936	0.357	1.21945	0.976789	2.19624	14.8478	9.96768
120	1680	0.0881754	0.0853213	0.025346	0.357	1.19362	1.00784	2.20146	11.3035	4.89025
240	1680	0.0747223	0.0966256	0.0052371	0.357	0.957006	1.14137	2.09838	2.33557	0.00349125
360	1680	0.0547617	0.166456	-0.00440729	0.357	0.596252	1.96623	2.56249	-1.9655	2.21656e-15
480	1680	0.0581802	0.0701863	-0.0156681	0.357	0.729997	0.829063	1.55906	-6.98746	2.2697e-06
600	1680	0.085532	0.0877827	0.0270643	0.357	1.14525	1.03692	2.18217	12.0697	1.42814
720	1680	0.0895052	0.0788022	0.0436441	0.357	1.2257	0.930838	2.15654	19.4638	15.1716
840	1680	0.0891167	0.0782781	0.0430163	0.357	1.2197	0.924647	2.14435	19.1838	14.1099
960	1680	0.090545	0.0794996	0.0389258	0.357	1.2428	0.939075	2.18188	17.3596	19.7783
1080	1680	0.0892272	0.0772701	0.0404369	0.357	1.22304	0.91274	2.13578	18.0335	16.3194
1200	1680	0.0895427	0.077171	0.0427344	0.357	1.22866	0.911569	2.14023	19.0581	18.2943
1320	1680	0.0897157	0.0757294	0.0451563	0.357	1.23371	0.89454	2.12825	20.1382	22.6348
1440	1680	0.0890609	0.0759544	0.0459087	0.357	1.222	0.897198	2.1192	20.4737	17.8425
1560	1680	0.0887839	0.0765052	0.0455831	0.357	1.21642	0.903704	2.12013	20.3285	15.3216
1680	1680	0.0904521	0.0778216	0.0408827	0.357	1.24358	0.919254	2.16283	18.2323	22.8875
1800	1680	0.0902312	0.0799077	0.0394641	0.357	1.23675	0.943896	2.18065	17.5996	17.1305
1920	1680	0.0898578	0.0794313	0.0393596	0.357	1.23094	0.938269	2.16921	17.553	15.9402
2040	1680	0.0904863	0.0781895	0.0379239	0.357	1.24365	0.9236	2.16725	16.9128	22.2585
2160	1680	0.0897638	0.0799934	0.0363028	0.357	1.22851	0.944908	2.17342	16.1898	14.5715
2280	1680	0.0906739	0.0790797	0.0386728	0.357	1.24565	0.934115	2.17977	17.2467	21.5306
2400	1680	0.0912003	0.0807335	0.0336375	0.357	1.25247	0.95365	2.20612	15.0012	21.4825
0	1800	0.0879683	0.0823647	0.0342081	0.357	1.19417	0.972919	2.16709	15.2556	6.17123
120	1800	0.0884285	0.0823073	0.030938	0.357	1.20217	0.972241	2.17441	13.7973	7.28887
240	1800	0.0864827	0.0834996	0.0165904	0.357	1.1672	0.986325	2.15352	7.39873	3.20733
360	1800	0.0875173	0.0868319	0.00975692	0.357	1.18027	1.02569	2.20595	4.35125	3.3133
480	1800	0.0767613	0.0870545	-0.0115292	0.357	1.00112	1.02832	2.02944	-5.14163	0.0322729
600	1800	0.0838385	0.0859301	0.03318	0.357	1.11921	1.01503	2.13425	14.7971	0.891031
720	1800	0.0891961	0.0794431	0.0445979	0.357	1.21944	0.938408	2.15785	19.8891	12.792
840	1800	0.0892307	0.0778914	0.0428425	0.357	1.22222	0.920079	2.1423	19.1063	15.2762
960	1800	0.0896402	0.0764848	0.0443645	0.357	1.23133	0.903463	2.13479	19.785	20.3426
1080	1800	0.08873	0.0762603	0.0480296	0.357	1.21583	0.900812	2.11664	21.4195	15.4617
1200	1800	0.0889913	0.074362	0.0462186	0.357	1.22303	0.878388	2.10142	20.6119	20.8244
1320	1800	0.087629	0.073069	0.046789	0.357	1.2012	0.863115	2.06432	20.8663	15.3626
1440	1800	0.088432	0.0763176	0.0442009	0.357	1.21059	0.901489	2.11208	19.7121	13.908
1560	1800	0.0896587	0.0781472	0.0383027	0.357	1.2293	0.9231	2.15239	17.0817	17.1095
1680	1800	0.0911233	0.0797163	0.03265	0.357	1.25259	0.941634	2.19422	14.5608	23.2559
1800	1800	0.0899617	0.0843073	0.0292472	0.357	1.22582	0.995865	2.22169	13.0433	10.0162
1920	1800	0.089968	0.0778464	0.0380851	0.357	1.2351	0.919547	2.15465	16.9846	19.5382
2040	1800	0.0900702	0.0790341	0.0376663	0.357	1.2352	0.933577	2.16877	16.7979	17.8112
2160	1800	0.0898855	0.0795388	0.0336575	0.357	1.23127	0.939539	2.17081	15.0101	15.905
2280	1800	0.0885635	0.0816424	0.0320587	0.357	1.20542	0.964387	2.16981	14.2971	8.18664
2400	1800	0.0911646	0.0852834	0.0299067	0.357	1.2453	1.00739	2.25269	13.3374	13.5301
0	1920	0.0905713	0.0833999	0.0333009	0.357	1.23769	0.985146	2.22283	14.851	13.4166
120	1920	0.0896485	0.0820789	0.0344239	0.357	1.22356	0.969543	2.1931	15.3519	11.301
240	1920	0.086467	0.0802303	0.0294579	0.357	1.17139	0.947706	2.1191	13.1372	4.54409
360	1920	0.0854464	0.0784689	0.00484014	0.357	1.15637	0.9269	2.08327	2.15853	3.80813
480	1920	0.070904	0.111787	0.0194906	0.357	0.880053	1.32047	2.20052	8.69214	5.86638e-05
600	1920	0.0907374	0.0845207	0.0378629	0.357	1.23897	0.998386	2.23736	16.8856	12.6791
720	1920	0.0898725	0.0784099	0.045993	0.357	1.23264	0.926203	2.15884	20.5113	17.8403
840	1920	0.0903296	0.0786245	0.0434666	0.357	1.2403	0.928738	2.16903	19.3846	20.2207
960	1920	0.0894869	0.076305	0.0433892	0.357	1.22891	0.90134	2.13025	19.3501	19.7368
1080	1920	0.0896925	0.0777878	0.0439577	0.357	1.23039	0.918854	2.14925	19.6036	17.9777
1200	1920	0.089434	0.0751226	0.0441445	0.357	1.22966	0.887373	2.11703	19.6869	22.0926
1320	1920	0.0891729	0.075664	0.0395592	0.357	1.22436	0.893768	2.11812	17.642	19.1138
1440	1920	0.0899952	0.0795743	0.0373785	0.357	1.23312	0.939957	2.17308	16.6695	16.4246
1560	1920	0.0883977	0.078975	0.0377004	0.357	1.20629	0.932878	2.13916	16.8131	10.2747
1680	1920	0.0903672	0.0803714	0.0331796	0.357	1.23846	0.949373	2.18783	14.797	17.0646
1800	1920	0.0900103	0.0796279	0.0351324	0.357	1.23331	0.94059	2.1739	15.6678	16.4132
1920	1920	0.0891426	0.0766936	0.0417762	0.357	1.22238	0.90593	2.12831	18.6307	16.8994
2040	1920	0.0895067	0.0775141	0.0432224	0.357	1.22755	0.915622	2.14317	19.2757	17.4234
2160	1920	0.0903313	0.0812894	0.035506	0.357	1.23653	0.960217	2.19674	15.8345	15.3493
2280	1920	0.0908781	0.0835525	0.0302233	0.357	1.2428	0.986949	2.22975	13.4786	14.6053
2400	1920	0.0900605	0.086984	0.0237013	0.357	1.22373	1.02748	2.25121	10.57	7.95817
0	2040	0.0917986	0.0805397	0.0325674	0.357	1.26322	0.951361	2.21458	14.5239	26.4414
120	2040	0.0903514	0.0838973	0.0357121	0.357	1.23316	0.991022	2.22418	15.9264	11.8772
240	2040	0.0902025	0.082463	0.0337353	0.357	1.23262	0.97408	2.2067	15.0448	13.059
360	2040	0.0730464	0.090645	0.0245929	0.357	0.937422	1.07073	2.00815	10.9676	0.00279572
480	2040	0.0474642	0.0530713	0.0181444	0.357	0.587528	0.626895	1.21442	8.09177	5.46325e-09
600	2040	0.0906302	0.083766	0.035742	0.357	1.23819	0.989471	2.22766	15.9397	13.1886
720	2040	0.0907093	0.0820043	0.0396482	0.357	1.24208	0.968661	2.21074	17.6817	16.1407
840	2040	0.0888254	0.0780185	0.0382665	0.357	1.21502	0.92158	2.1366	17.0656	13.1669
960	2040	0.0900035	0.0779187	0.0430299	0.357	1.23562	0.920401	2.15602	19.1899	19.6126
1080	2040	0.0894913	0.0759678	0.0413047	0.357	1.22947	0.897356	2.12682	18.4205	20.5078
1200	2040	0.0889373	0.0754175	0.0379716	0.357	1.22061	0.890856	2.11146	16.934	18.1819
1320	2040	0.0892106	0.0770149	0.0366708	0.357	1.22311	0.909725	2.13283	16.3539	16.6869
1440	2040	0.0898099	0.0818265	0.0346565	0.357	1.22671	0.966562	2.19327	15.4556	12.2376
1560	2040	0.0904288	0.0813807	0.0350882	0.357	1.23809	0.961295	2.19939	15.6482	15.698
1680	2040	0.0852711	0.0925653	0.0285108	0.357	1.13442	1.09341	2.22783	12.7148	0.793127
1800	2040	0.0898019	0.0802105	0.0406829	0.357	1.22886	0.947473	2.17633	18.1432	14.4246
1920	2040	0.088976	0.0760817	0.0439361	0.357	1.22035	0.898702	2.11905	19.594	17.1086
2040	2040	0.0886681	0.0769865	0.0402783	0.357	1.21374	0.90939	2.12313	17.9627	13.9805
2160	2040	0.0895691	0.0801364	0.0364638	0.357	1.22493	0.946597	2.17152	16.2616	13.4607
2280	2040	0.0892408	0.082478	0.0316244	0.357	1.21594	0.974257	2.1902	14.1034	9.45744
2400	2040	0.0902035	0.0852738	0.0183033	0.357	1.22864	1.00728	2.23592	8.16266	9.86801
0	2160	0.0903159	0.0791103	0.037395	0.357	1.23936	0.934476	2.17384	16.6769	19.1322
120	2160	0.0914749	0.0790339	0.0367058	0.357	1.25972	0.933574	2.1933	16.3695	27.8559
240	2160	0.0907994	0.0817249	0.0352507	0.357	1.24405	0.965361	2.20941	15.7206	17.0926
360	2160	0.0844133	0.0811698	0.0266885	0.357	1.13522	0.958804	2.09402	11.9022	1.89491
480	2160	0.0838067	0.0836094	0.0171066	0.357	1.12175	0.987621	2.10937	7.62895	1.13562
600	2160	0.0899968	0.0862493	0.0318184	0.357	1.22367	1.01881	2.24248	14.1899	8.36646
720	2160	0.0876299	0.0810953	0.0382426	0.357	1.19012	0.957925	2.14805	17.0549	6.26879
840	2160	0.0900279	0.0793995	0.0366423	0.357	1.23394	0.937893	2.17183	16.3412	16.9071
960	2160	0.0892617	0.0752829	0.0426182	0.357	1.22643	0.889266	2.1157	19.0063	20.523
1080	2160	0.0879624	0.0735951	0.0440206	0.357	1.20625	0.869329	2.07557	19.6317	16.1682
1200	2160	0.0887608	0.0729405	0.0435534	0.357	1.22101	0.861597	2.08261	19.4233	22.6956
1320	2160	0.0901667	0.0779614	0.0357878	0.357	1.2384	0.920905	2.15931	15.9601	20.5797
1440	2160	0.0911673	0.0842879	0.0299717	0.357	1.24678	0.995636	2.24242	13.3663	14.9201
1560	2160	0.0910385	0.0834562	0.0294531	0.357	1.24573	0.985812	2.23155	13.1351	15.5316
1680	2160	0.0904864	0.0876802	0.033913	0.357	1.2301	1.03571	2.26581	15.124	8.58897
1800	2160	0.0910608	0.0784656	0.0389603	0.357	1.25329	0.926861	2.18015	17.3749	25.9458
1920	2160	0.0889793	0.0764806	0.0393124	0.357	1.21984	0.903414	2.12326	17.532	16.3912
2040	2160	0.0887283	0.0789843	0.0410592	0.357	1.21199	0.932988	2.14497	18.311	11.4825
2160	2160	0.0909196	0.0777285	0.0383331	0.357	1.25188	0.918155	2.17003	17.0953	26.8055
2280	2160	0.089171	0.0777287	0.0327208	0.357	1.22142	0.918157	2.13957	14.5924	15.243
2400	2160	0.0909608	0.0817047	0.0243257	0.357	1.24689	0.965122	2.21202	10.8484	18.0408
0	2280	0.0902041	0.0798182	0.042699	0.357	1.23641	0.942839	2.17925	19.0423	17.1391
120	2280	0.0910454	0.0792197	0.035554	0.357	1.25194	0.935769	2.18771	15.8559	23.8793
240	2280	0.0919439	0.0862814	0.0340707	0.357	1.25743	1.01918	2.27662	15.1943	15.8054
360	2280	0.0907535	0.0840772	0.027388	0.357	1.23988	0.993147	2.23303	12.2141	13.3151
480	2280	0.089047	0.080577	0.0341865	0.357	1.21526	0.951801	2.16707	15.246	10.7942
600	2280	0.0907565	0.0796221	0.0405225	0.357	1.24632	0.940522	2.18684	18.0717	20.8981
720	2280	0.0915507	0.0789914	0.0410121	0.357	1.26111	0.933072	2.19418	18.29	28.6459
840	2280	0.0908704	0.0792457	0.0379847	0.357	1.24884	0.936075	2.18492	16.9399	22.5301
960	2280	0.0907118	0.0806283	0.0356709	0.357	1.2441	0.952408	2.1965	15.908	18.5765
1080	2280	0.089002	0.073303	0.0458879	0.357	1.2247	0.865879	2.09058	20.4644	23.5537
1200	2280	0.0889022	0.073738	0.0490246	0.357	1.22235	0.871017	2.09337	21.8633	21.7026
1320	2280	0.0916152	0.0786469	0.0382511	0.357	1.26274	0.929003	2.19174	17.0587	30.2789
1440	2280	0.0899321	0.0845086	0.0319498	0.357	1.22502	0.998242	2.22327	14.2485	9.7205
1560	2280	0.0911879	0.0817067	0.0324206	0.357	1.25085	0.965145	2.216	14.4585	19.3972
1680	2280	0.0913461	0.0805895	0.0366007	0.357	1.25522	0.951949	2.20717	16.3226	22.8273
1800	2280	0.0908004	0.0773491	0.0393762	0.357	1.25034	0.913672	2.16401	17.5604	26.8703
1920	2280	0.0895023	0.0781814	0.0404419	0.357	1.22653	0.923504	2.15003	18.0357	16.1951
2040	2280	0.089993	0.0770149	0.0430707	0.357	1.23672	0.909725	2.14644	19.208	21.5296
2160	2280	0.0916254	0.0791579	0.038346	0.357	1.26218	0.935038	2.19722	17.101	28.8233
2280	2280	0.0911206	0.081753	0.0325036	0.357	1.24961	0.965694	2.21531	14.4955	18.8967
2400	2280	0.0980044	0.0822002	0.0212756	0.357	1.37095	0.970976	2.34193	9.48818	134.193
0	2400	0.0891074	0.0765784	0.0437495	0.357	1.22193	0.904569	2.1265	19.5108	16.9166
120	2400	0.0905211	0.0783766	0.0407119	0.357	1.24399	0.92581	2.1698	18.1561	22.0681
240	2400	0.0911234	0.0841219	0.0385819	0.357	1.24625	0.993675	2.23993	17.2062	14.9507
360	2400	0.0879343	0.0802698	0.0377789	0.357	1.1965	0.948173	2.14467	16.8481	7.61901
480	2400	0.0913616	0.078448	0.0406778	0.357	1.25858	0.926653	2.18524	18.1409	28.5626
600	2400	0.0911605	0.0790244	0.0400788	0.357	1.25423	0.933462	2.18769	17.8738	25.2667
720	2400	0.090581	0.0842861	0.034977	0.357	1.23659	0.995615	2.2322	15.5986	12.3262
840	2400	0.0835859	0.0894727	0.0229182	0.357	1.11031	1.05688	2.16719	10.2207	0.550041
960	2400	0.087868	0.0880324	0.0292976	0.357	1.18459	1.03987	2.22446	13.0657	3.33533
1080	2400	0.0899451	0.0750107	0.0480521	0.357	1.23873	0.886051	2.12478	21.4296	26.3595
1200	2400	0.088371	0.0743585	0.0484628	0.357	1.21226	0.878347	2.09061	21.6127	16.9806
1320	2400	0.0911568	0.0784931	0.0383794	0.357	1.25493	0.927186	2.18212	17.1159	26.6644
1440	2400	0.0920078	0.0832136	0.0311816	0.357	1.263	0.982946	2.24595	13.9059	21.6608
1560	2400	0.0918071	0.0839715	0.0330544	0.357	1.25839	0.991899	2.25029	14.7412	18.8852
1680	2400	0.0909309	0.079817	0.0379671	0.357	1.24908	0.942824	2.1919	16.932	21.6536
1800	2400	0.0897585	0.0775118	0.0407917	0.357	1.23193	0.915594	2.14752	18.1917	18.9197
1920	2400	0.089936	0.0759135	0.041772	0.357	1.23729	0.896715	2.134	18.6289	23.8124
2040	2400	0.0887302	0.0775667	0.0421164	0.357	1.214	0.916244	2.13025	18.7825	13.3956
2160	2400	0.0887769	0.0774499	0.0418063	0.357	1.21498	0.914863	2.12984	18.6442	13.7814
2280	2400	0.0895516	0.0782566	0.0405987	0.357	1.22728	0.924392	2.15167	18.1056	16.3279
2400	2400	0.0880807	0.0866417	0.0323563	0.357	1.19016	1.02344	2.2136	14.4298	4.13758
0	2520	0.0888406	0.0780603	0.0446597	0.357	1.21522	0.922074	2.1373	19.9167	13.1742
120	2520	0.0894116	0.0786276	0.0437154	0.357	1.22432	0.928775	2.1531	19.4956	14.9863
240	2520	0.088888	0.0763777	0.0389236	0.357	1.2184	0.902199	2.1206	17.3586	16.0844
360	2520	0.0902655	0.0765222	0.0425825	0.357	1.24217	0.903905	2.14608	18.9904	24.7709
480	2520	0.0896332	0.077811	0.0412922	0.357	1.22933	0.919129	2.14846	18.4149	17.5889
600	2520	0.0922014	0.0810362	0.0364454	0.357	1.26956	0.957226	2.22678	16.2534	28.5091
720	2520	0.0722237	0.111521	0.00769651	0.357	0.90064	1.31732	2.21796	3.43238	0.000144584
840	2520	0.00592554	0.0853739	-0.0102168	0.357	0.0602467	1.00846	1.06871	-4.55636	6.51877e-133
960	2520	0.0875512	0.107798	0.0181044	0.357	1.15188	1.27335	2.42523	8.07395	0.489573
1080	2520	0.0906964	0.0786884	0.0423734	0.357	1.2466	0.929493	2.1761	18.8971	22.5879
1200	2520	0.0912556	0.0788689	0.0386304	0.357	1.25612	0.931626	2.18775	17.2278	26.4545
1320	2520	0.0914789	0.0826066	0.0322331	0.357	1.25463	0.975776	2.23041	14.3749	19.4541
1440	2520	0.0914082	0.0862559	0.0296926	0.357	1.24814	1.01888	2.26702	13.2419	13.3355
1560	2520	0.0904545	0.0852513	0.0315551	0.357	1.23302	1.00702	2.24003	14.0725	10.7512
1680	2520	0.0912886	0.0817878	0.041354	0.357	1.25249	0.966104	2.2186	18.4425	19.8672
1800	2520	0.0899834	0.0780982	0.0429408	0.357	1.23501	0.922521	2.15753	19.1501	19.1167
1920	2520	0.0887962	0.0773645	0.0466655	0.357	1.21543	0.913855	2.12928	20.8112	14.0001
2040	2520	0.0905574	0.0767961	0.0456666	0.357	1.24688	0.907141	2.15402	20.3657	26.3903
2160	2520	0.0898953	0.0764691	0.0434974	0.357	1.23579	0.903278	2.13907	19.3983	22.1282
2280	2520	0.0905906	0.0780731	0.0439238	0.357	1.24564	0.922225	2.16786	19.5885	23.2944
2400	2520	0.0878032	0.0796294	0.0403223	0.357	1.19513	0.940609	2.13574	17.9824	7.80036
0	2640	0.0906059	0.0791919	0.0460973	0.357	1.2443	0.935441	2.17974	20.5578	20.823
120	2640	0.0897314	0.077918	0.041749	0.357	1.23088	0.920392	2.15128	18.6186	17.9553
240	2640	0.0897044	0.0773823	0.0441813	0.357	1.23117	0.914065	2.14524	19.7033	18.8499
360	2640	0.0890949	0.0748612	0.0488435	0.357	1.22413	0.884284	2.10841	21.7825	20.3699
480	2640	0.0890666	0.0744656	0.0457239	0.357	1.22419	0.879612	2.1038	20.3913	21.0955
600	2640	0.089041	0.0747721	0.0407337	0.357	1.22332	0.883232	2.10655	18.1658	20.2146
720	2640	0.0781784	0.076834	0.0110152	0.357	1.03675	0.907588	1.94434	4.91239	0.232832
840	2640	0.00354672	0.0752108	0.0105152	0.357	0.0362837	0.888415	0.924698	4.68942	8.99951e-144
960	2640	0.0618802	0.111455	0.00859833	0.357	0.745505	1.31654	2.06204	3.83456	4.59049e-08
1080	2640	0.0901349	0.0821437	0.035956	0.357	1.2319	0.970308	2.20221	16.0352	13.1921
1200	2640	0.0907353	0.079529	0.0391705	0.357	1.24608	0.939422	2.1855	17.4687	20.9575
1320	2640	0.0908843	0.0817667	0.037298	0.357	1.24547	0.965855	2.21133	16.6336	17.4931
1440	2640	0.0915043	0.0897127	0.0279328	0.357	1.24482	1.05972	2.30453	12.4571	9.94682
1560	2640	0.0683334	0.130624	0.0331094	0.357	0.820642	1.54297	2.36361	14.7657	1.1322e-06
1680	2640	0.0899944	0.0802531	0.037978	0.357	1.23215	0.947975	2.18012	16.9369	15.2984
1800	2640	0.0899028	0.0792286	0.0429232	0.357	1.23201	0.935874	2.16788	19.1423	16.5247
1920	2640	0.0901238	0.0764401	0.0408646	0.357	1.23982	0.902935	2.14275	18.2242	23.8859
2040	2640	0.0902726	0.0786779	0.0402298	0.357	1.23923	0.929369	2.1686	17.9411	19.7421
2160	2640	0.091038	0.0798832	0.040039	0.357	1.25086	0.943606	2.19446	17.856	22.2518
2280	2640	0.0905987	0.080355	0.040181	0.357	1.24252	0.94918	2.1917	17.9194	18.4216
2400	2640	0.0911002	0.0797234	0.0414614	0.357	1.25217	0.941719	2.19389	18.4903	23.0697
0	2760	0.0891213	0.0779228	0.0434595	0.357	1.22028	0.920449	2.14073	19.3815	14.6831
120	2760	0.0894604	0.0776464	0.0450973	0.357	1.22656	0.917185	2.14374	20.1119	16.9179
240	2760	0.0886999	0.0753995	0.0485539	0.357	1.21651	0.890644	2.10716	21.6534	16.8447
360	2760	0.089202	0.0740249	0.0491272	0.357	1.22717	0.874406	2.10157	21.909	23.162
480	2760	0.0890211	0.0741925	0.0480474	0.357	1.22378	0.876386	2.10017	21.4275	21.4319
600	2760	0.0886069	0.0762056	0.0429175	0.357	1.21377	0.900165	2.11394	19.1397	14.9306
720	2760	0.078546	0.0784823	0.0336416	0.357	1.04077	0.927058	1.96782	15.003	0.222208
840	2760	0.00773406	0.15958	-0.0020293	0.357	0.0701516	1.88502	1.95517	-0.904998	0
960	2760	0.0081625	0.0878506	0.00766253	0.357	0.0834194	1.03772	1.12114	3.41723	1.14807e-111
1080	2760	0.0897247	0.0845622	0.0361168	0.357	1.22136	0.998877	2.22024	16.1068	9.01729
1200	2760	0.0897695	0.075544	0.0466853	0.357	1.23491	0.892351	2.12726	20.8201	23.5027
1320	2760	0.089327	0.0765189	0.0425223	0.357	1.22583	0.903866	2.12969	18.9635	18.3004
1440	2760	0.0928749	0.0823383	0.0362708	0.357	1.27948	0.972607	2.25209	16.1755	30.8478
1560	2760	0.090763	0.0827154	0.0352298	0.357	1.242	0.977061	2.21906	15.7113	15.2916
1680	2760	0.0909134	0.0799081	0.0414346	0.357	1.24864	0.943901	2.19254	18.4784	21.3325
1800	2760	0.0914513	0.0793313	0.0415357	0.357	1.25888	0.937087	2.19597	18.5235	26.8207
1920	2760	0.0924332	0.0820795	0.0358312	0.357	1.2721	0.96955	2.24165	15.9795	27.627
2040	2760	0.0898341	0.0823894	0.0335569	0.357	1.22633	0.97321	2.19954	14.9652	11.6467
2160	2760	0.0907438	0.0822345	0.0363025	0.357	1.24235	0.971381	2.21373	16.1897	15.9479
2280	2760	0.0905727	0.0814503	0.0386907	0.357	1.2405	0.962117	2.20261	17.2547	16.3326
2400	2760	0.0911881	0.0810148	0.0351872	0.357	1.25185	0.956973	2.20883	15.6923	20.7987
0	2880	0.0901017	0.0739701	0.0476962	0.357	1.24294	0.873759	2.1167	21.2709	31.0714
120	2880	0.0895506	0.0756899	0.0477781	0.357	1.23089	0.894074	2.12496	21.3074	21.5521
240	2880	0.0901437	0.0748267	0.0468293	0.357	1.24246	0.883878	2.12634	20.8843	28.6491
360	2880	0.0898757	0.0752982	0.0478025	0.357	1.23711	0.889447	2.12656	21.3183	24.9805
480	2880	0.0892993	0.0757205	0.0462155	0.357	1.22647	0.894435	2.12091	20.6105	19.7958
600	2880	0.0887331	0.0773185	0.0452921	0.357	1.2144	0.913312	2.12771	20.1987	13.7774
720	2880	0.0836119	0.0785924	0.0406414	0.357	1.12509	0.928359	2.05345	18.1247	1.86671
840	2880	0.0728842	0.0922368	0.0348517	0.357	0.933025	1.08953	2.02256	15.5426	0.00208062
960	2880	0.0854367	0.080117	0.0358595	0.357	1.15398	0.946368	2.10035	15.9921	3.14883
1080	2880	0.0902736	0.0773776	0.0462563	0.357	1.2411	0.914009	2.15511	20.6287	22.6624
1200	2880	0.0888567	0.0735636	0.0501785	0.357	1.22181	0.868958	2.09076	22.3779	21.8101
1320	2880	0.0896886	0.0763298	0.0468803	0.357	1.23239	0.901633	2.13402	20.907	21.0145
1440	2880	0.0898064	0.078967	0.0421487	0.357	1.2307	0.932784	2.16349	18.7969	16.4593
1560	2880	0.0904139	0.080471	0.0445042	0.357	1.23913	0.950549	2.18968	19.8474	17.1482
1680	2880	0.0895498	0.0772117	0.047162	0.357	1.22872	0.91205	2.14077	21.0326	18.2564
1800	2880	0.0906919	0.0801105	0.0427258	0.357	1.24449	0.946291	2.19078	19.0542	19.4651
1920	2880	0.0899198	0.07917	0.0302328	0.357	1.23239	0.935181	2.16757	13.4828	16.7193
2040	2880	0.090337	0.0859876	0.032402	0.357	1.22993	1.01571	2.24564	14.4502	9.62097
2160	2880	0.0924362	0.0832217	0.0346283	0.357	1.27049	0.983042	2.25353	15.443	24.74
2280	2880	0.0911589	0.0829693	0.0385966	0.357	1.24853	0.980061	2.22859	17.2127	16.9431
2400	2880	0.0908673	0.0829611	0.0371207	0.357	1.24346	0.979964	2.22343	16.5545	15.4346
0	3000	0.0874934	0.0718659	0.0512758	0.357	1.20052	0.848903	2.04942	22.8672	16.9049
120	3000	0.087867	0.0719634	0.0486082	0.357	1.20685	0.850055	2.05691	21.6776	18.9363
240	3000	0.0890959	0.0724518	0.0517874	0.357	1.22753	0.855824	2.08336	23.0954	26.7558
360	3000	0.0888004	0.074304	0.0485101	0.357	1.21979	0.877703	2.09749	21.6339	19.6904
480	3000	0.0889435	0.0744127	0.0480091	0.357	1.22213	0.878987	2.10111	21.4104	20.3846
600	3000	0.0896878	0.0776813	0.0447732	0.357	1.23046	0.917597	2.14806	19.9673	18.1559
720	3000	0.0809153	0.0810117	0.0435859	0.357	1.07678	0.956936	2.03372	19.4378	0.463177
840	3000	0.0882282	0.0817218	0.0408568	0.357	1.19954	0.965325	2.16486	18.2207	7.23049
960	3000	0.0889216	0.0840238	0.0409478	0.357	1.20826	0.992516	2.20078	18.2613	7.24085
1080	3000	0.0900313	0.0787361	0.0439347	0.357	1.23494	0.930056	2.165	19.5934	18.1483
1200	3000	0.0891025	0.0740012	0.04385	0.357	1.22547	0.874126	2.0996	19.5556	22.4868
1320	3000	0.0896877	0.0764235	0.0435574	0.357	1.23224	0.902739	2.13498	19.4251	20.796
1440	3000	0.0889701	0.0741924	0.0440772	0.357	1.2229	0.876385	2.09928	19.6569	21.0792
1560	3000	0.0897011	0.0779638	0.0448241	0.357	1.23029	0.920934	2.15123	19.99	17.6915
1680	3000	0.0905839	0.0793984	0.0431245	0.357	1.24363	0.93788	2.18151	19.232	20.2382
1800	3000	0.0925119	0.0834959	0.0359627	0.357	1.27142	0.986281	2.2577	16.0381	24.6655
1920	3000	0.0920305	0.0842736	0.0287821	0.357	1.26186	0.995467	2.25733	12.8358	19.6838
2040	3000	0.0913912	0.0845415	0.0351531	0.357	1.25031	0.998632	2.24895	15.6771	15.6452
2160	3000	0.089006	0.0865912	0.0337013	0.357	1.20611	1.02284	2.22895	15.0296	5.7616
2280	3000	0.0897386	0.0875175	0.029226	0.357	1.21742	1.03379	2.2512	13.0338	6.77367
2400	3000	0.0866486	0.0881375	0.0242664	0.357	1.16368	1.04111	2.20479	10.822	2.10659
0	3120	0.0876593	0.0710582	0.0502395	0.357	1.20451	0.839363	2.04387	22.4051	19.6689
120	3120	0.0873301	0.071231	0.0510846	0.357	1.19857	0.841404	2.03997	22.782	17.2562
240	3120	0.0876948	0.0723769	0.0513945	0.357	1.2033	0.85494	2.05824	22.9202	17.0304
360	3120	0.0887752	0.074544	0.0501078	0.357	1.21902	0.880538	2.09956	22.3464	19.0071
480	3120	0.088808	0.0757984	0.0473122	0.357	1.21783	0.895356	2.11319	21.0996	16.7003
600	3120	0.0902813	0.0784872	0.0421321	0.357	1.23965	0.927116	2.16677	18.7895	20.1989
720	3120	0.0897667	0.0797611	0.0407435	0.357	1.22889	0.942164	2.17105	18.1702	14.9447
840	3120	0.0894338	0.0817177	0.0367106	0.357	1.22035	0.965276	2.18562	16.3717	10.9156
960	3120	0.0884815	0.0843884	0.0275204	0.357	1.20018	0.996823	2.197	12.2732	5.98912
1080	3120	0.0919574	0.0826731	0.0363408	0.357	1.2629	0.976562	2.23947	16.2068	22.479
1200	3120	0.0908919	0.0803657	0.0405468	0.357	1.24761	0.949306	2.19692	18.0825	20.2163
1320	3120	0.0918355	0.0807233	0.0364872	0.357	1.2636	0.95353	2.21713	16.2721	26.2584
1440	3120	0.0901855	0.081728	0.0360827	0.357	1.23337	0.965398	2.19877	16.0917	13.9934
1560	3120	0.090081	0.0793605	0.0386772	0.357	1.23492	0.937432	2.17235	17.2487	17.2724
1680	3120	0.092675	0.0803487	0.0386754	0.357	1.27888	0.949105	2.22799	17.2479	35.2898
1800	3120	0.0889417	0.0845547	0.0366839	0.357	1.20786	0.998788	2.20665	16.3598	6.90863
1920	3120	0.0862053	0.0873162	0.0320037	0.357	1.15728	1.03141	2.18869	14.2726	1.93885
2040	3120	0.0887703	0.0874124	0.0326743	0.357	1.20091	1.03254	2.23345	14.5716	4.89226
2160	3120	0.0891964	0.0888175	0.0299419	0.357	1.20625	1.04914	2.25539	13.3531	4.95203
2280	3120	0.0895842	0.0866921	0.0167885	0.357	1.21592	1.02404	2.23996	7.48709	6.96359
2400	3120	0.0909278	0.0918069	0.0260008	0.357	1.23182	1.08445	2.31628	11.5955	6.77544
0	3240	0.0900326	0.0759324	0.0473209	0.357	1.23895	0.896939	2.13589	21.1035	24.5099
120	3240	0.0900007	0.0800579	0.0447871	0.357	1.23253	0.94567	2.1782	19.9735	15.644
240	3240	0.0898021	0.0804146	0.0434027	0.357	1.22858	0.949884	2.17846	19.3561	14.1224
360	3240	0.0901747	0.0780275	0.0437951	0.357	1.23845	0.921686	2.16013	19.5311	20.4886
480	3240	0.0903936	0.0794181	0.0452444	0.357	1.24028	0.938112	2.17839	20.1774	18.9982
600	3240	0.0903462	0.0777676	0.0441465	0.357	1.24181	0.918616	2.16042	19.6878	22.2533
720	3240	0.0900592	0.0799166	0.0419937	0.357	1.23375	0.944001	2.17775	18.7278	16.1827
840	3240	0.0900968	0.0822753	0.0379077	0.357	1.23105	0.971863	2.20291	16.9055	12.8541
960	3240	0.0920935	0.0810309	0.0365864	0.357	1.26767	0.957163	2.22484	16.3163	27.5883
1080	3240	0.0919181	0.0842798	0.0371696	0.357	1.25988	0.995541	2.25543	16.5764	18.9853
1200	3240	0.0918252	0.0850135	0.0343314	0.357	1.2572	1.00421	2.26141	15.3106	17.1752
1320	3240	0.0922589	0.0868475	0.0261671	0.357	1.26211	1.02587	2.28798	11.6696	16.5656
1440	3240	0.0902054	0.0863598	0.0297021	0.357	1.22712	1.02011	2.24723	13.2461	8.87853
1560	3240	0.0955148	0.0867147	0.0344189	0.357	1.31959	1.0243	2.34389	15.3496	45.0119
1680	3240	0.0934289	0.0839689	0.0381872	0.357	1.28683	0.991868	2.2787	17.0302	31.2248
1800	3240	0.0910402	0.0835417	0.0335487	0.357	1.24564	0.986822	2.23246	14.9616	15.4091
1920	3240	0.0923187	0.0836811	0.0355071	0.357	1.26776	0.988468	2.25623	15.835	22.8149
2040	3240	0.0902911	0.0825483	0.0328834	0.357	1.23403	0.975088	2.20912	14.6649	13.3298
2160	3240	0.0851548	0.0885003	0.0248267	0.357	1.13792	1.04539	2.18332	11.0719	1.14464
2280	3240	0.0847801	0.0769649	0.0111461	0.357	1.14705	0.909134	2.05618	4.97076	3.53548
2400	3240	0.0872001	0.0857031	0.0234547	0.357	1.17641	1.01235	2.18876	10.46	3.31255
0	3360	0.0769961	0.0413331	0.0235413	0.357	1.06047	0.48824	1.54871	10.4986	52.3958
120	3360	0.0908459	0.0868051	0.0308698	0.357	1.23758	1.02537	2.26295	13.7669	10.5261
240	3360	0.0903848	0.0870543	0.0362253	0.357	1.22924	1.02831	2.25755	16.1553	8.81564
360	3360	0.0916471	0.0799709	0.0431142	0.357	1.26138	0.944642	2.20603	19.2274	26.7125
480	3360	0.0916925	0.0787444	0.0447432	0.357	1.26395	0.930155	2.19411	19.9539	30.7032
600	3360	0.0917872	0.079701	0.0463992	0.357	1.26423	0.941455	2.20569	20.6925	28.6772
720	3360	0.0905486	0.0783727	0.041141	0.357	1.24447	0.925763	2.17024	18.3475	22.2722
840	3360	0.0905447	0.0797506	0.0429415	0.357	1.24244	0.94204	2.18448	19.1504	19.2687
960	3360	0.0911574	0.080237	0.0425138	0.357	1.25243	0.947785	2.20022	18.9597	22.289
1080	3360	0.0914865	0.0826322	0.0390312	0.357	1.25473	0.976079	2.23081	17.4066	19.4518
1200	3360	0.0905921	0.0824955	0.0342664	0.357	1.23934	0.974464	2.2138	15.2816	14.7877
1320	3360	0.0906929	0.0820449	0.0295623	0.357	1.24174	0.969141	2.21088	13.1838	15.9893
1440	3360	0.0921762	0.0846297	0.0344821	0.357	1.26389	0.999673	2.26356	15.3778	19.9145
1560	3360	0.0911215	0.0848024	0.0326121	0.357	1.24524	1.00171	2.24696	14.5439	13.9801
1680	3360	0.0898479	0.0882368	0.0288565	0.357	1.21828	1.04228	2.26056	12.869	6.55984
1800	3360	0.0931764	0.0841903	0.0333705	0.357	1.28207	0.994483	2.27655	14.8821	28.3168
1920	3360	0.0911577	0.0836836	0.0352233	0.357	1.24748	0.988498	2.23598	15.7084	15.7826
2040	3360	0.086987	0.0918939	0.0264444	0.357	1.16428	1.08548	2.24976	11.7933	1.64745
2160	3360	0.0938512	0.0744904	0.00995839	0.357	1.30831	0.879905	2.18821	4.4411	90.3429
2280	3360	0.0476642	0.0942479	0.0187601	0.357	0.559424	1.11329	1.67271	8.36636	4.98378e-14
2400	3360	0.0742867	0.0842433	0.0314374	0.357	0.964616	0.995109	1.95973	14.02	0.0127503
0	3480	0.0872152	0.083973	0.0344906	0.357	1.17905	0.991917	2.17096	15.3816	3.98619
120	3480	0.0895772	0.0835838	0.0390588	0.357	1.2202	0.987319	2.20751	17.4189	9.46633
240	3480	0.0920168	0.0839195	0.039784	0.357	1.26213	0.991285	2.25342	17.7423	20.2816
360	3480	0.0916654	0.0831236	0.0411208	0.357	1.25715	0.981884	2.23903	18.3385	19.6146
480	3480	0.0907554	0.0806116	0.0429074	0.357	1.24488	0.952211	2.19709	19.1352	18.8709
600	3480	0.0920013	0.0806337	0.0452162	0.357	1.26663	0.952472	2.2191	20.1649	27.8957
720	3480	0.0909158	0.0807682	0.0420192	0.357	1.24745	0.95406	2.20151	18.7391	19.5515
840	3480	0.0911578	0.0787664	0.040954	0.357	1.25456	0.930414	2.18497	18.2641	25.9278
960	3480	0.0909487	0.0808241	0.042104	0.357	1.24795	0.954721	2.20267	18.7769	19.6465
1080	3480	0.0921185	0.081244	0.0386732	0.357	1.2678	0.959681	2.22748	17.2469	27.2194
1200	3480	0.091263	0.0821197	0.0354128	0.357	1.25157	0.970025	2.22159	15.7929	19.0624
1320	3480	0.0924614	0.0832895	0.0369684	0.357	1.27083	0.983842	2.25468	16.4867	24.7711
1440	3480	0.0918323	0.0843712	0.0338751	0.357	1.25825	0.99662	2.25487	15.1071	18.3135
1560	3480	0.091835	0.0834163	0.0362464	0.357	1.25969	0.985341	2.24503	16.1647	20.1114
1680	3480	0.0908169	0.0824839	0.034411	0.357	1.24327	0.974327	2.2176	15.3461	15.9261
1800	3480	0.0914448	0.0817134	0.0344063	0.357	1.25533	0.965225	2.22055	15.344	21.0329
1920	3480	0.0920081	0.0803368	0.033388	0.357	1.26718	0.948965	2.21615	14.8899	28.8002
2040	3480	0.0936835	0.0924321	0.0286313	0.357	1.27881	1.09184	2.37064	12.7686	15.685
2160	3480	0.0497687	0.0796008	-8.49962e-05	0.357	0.599917	0.940271	1.54019	-0.0379054	3.93572e-11
2280	3480	0.0801816	0.0958084	-0.00270796	0.357	1.04589	1.13172	2.17761	-1.20766	0.0629104
2400	3480	0.00888574	0.0788436	-0.0111024	0.357	0.0923369	0.931326	1.02366	-4.95131	2.11248e-90
0	3600	0.0857857	0.0781753	0.0413024	0.357	1.16255	0.923433	2.08598	18.4195	4.46205
120	3600	0.0896936	0.0803422	0.039215	0.357	1.2268	0.949029	2.17582	17.4885	13.7286
240	3600	0.0868265	0.0844606	0.0275698	0.357	1.17174	0.997676	2.16942	12.2952	3.28788
360	3600	0.0900908	0.0853115	0.0273891	0.357	1.22663	1.00773	2.23436	12.2146	9.4677
480	3600	0.0907702	0.0798675	0.0371511	0.357	1.2462	0.94342	2.18962	16.5681	20.4654
600	3600	0.0925172	0.0834234	0.0390881	0.357	1.27162	0.985424	2.25704	17.4319	24.8794
720	3600	0.0928928	0.0818743	0.0351646	0.357	1.28048	0.967126	2.24761	15.6822	32.4488
840	3600	0.0902557	0.0826636	0.0373078	0.357	1.23326	0.976449	2.20971	16.638	13.023
960	3600	0.0918534	0.0806266	0.0352211	0.357	1.26405	0.952388	2.21644	15.7074	26.6622
1080	3600	0.0911279	0.0808519	0.0365588	0.357	1.25103	0.955049	2.20608	16.304	20.7431
1200	3600	0.0927601	0.0820985	0.0351779	0.357	1.27782	0.969774	2.24759	15.6881	30.4884
1320	3600	0.0925656	0.0811943	0.0342954	0.357	1.27572	0.959093	2.23481	15.2945	31.3913
1440	3600	0.0917099	0.0816481	0.0332027	0.357	1.26006	0.964454	2.22451	14.8073	23.0171
1560	3600	0.091502	0.0827655	0.0361912	0.357	1.25481	0.977654	2.23246	16.14	19.2921
1680	3600	0.0925729	0.0811513	0.0369795	0.357	1.27591	0.958586	2.2345	16.4916	31.5951
1800	3600	0.0927697	0.0821993	0.035155	0.357	1.27784	0.970964	2.2488	15.6779	30.2792
1920	3600	0.0903122	0.08279	0.0343771	0.357	1.23406	0.977942	2.212	15.331	13.0994
2040	3600	0.075325	0.110185	0.0026629	0.357	0.950469	1.30154	2.25201	1.18756	0.00111226
2160	3600	0.0341941	0.0975504	-0.00501478	0.357	0.380682	1.1523	1.53298	-2.23642	3.9816e-27
2280	3600	0.0741035	0.0759807	-0.00399005	0.357	0.971342	0.897508	1.86885	-1.77943	0.0360085
2400	3600	0.0648044	0.0825697	0.00921929	0.357	0.818031	0.97534	1.79337	4.11149	4.26749e-05
0	3720	0.0842957	0.0767314	0.0402702	0.357	1.13913	0.906376	2.04551	17.9591	3.02704
120	3720	0.0887634	0.0769627	0.0366783	0.357	1.21542	0.909109	2.12453	16.3573	14.4704
240	3720	0.0866991	0.0825548	0.0333386	0.357	1.17218	0.975164	2.14734	14.8679	3.84089
360	3720	0.0907337	0.0842599	0.0338514	0.357	1.23928	0.995305	2.23458	15.0965	12.993
480	3720	0.0920418	0.088229	0.0329416	0.357	1.25631	1.04219	2.2985	14.6908	13.5879
600	3720	0.0928351	0.0845208	0.0356936	0.357	1.27559	0.998387	2.27398	15.9181	24.7117
720	3720	0.0924824	0.084975	0.0294349	0.357	1.26874	1.00375	2.2725	13.127	21.2108
840	3720	0.0914458	0.0851864	0.0303384	0.357	1.25033	1.00625	2.25658	13.5299	14.9586
960	3720	0.091361	0.0821611	0.0334235	0.357	1.25322	0.970514	2.22373	14.9057	19.5858
1080	3720	0.0908995	0.0807209	0.0376845	0.357	1.24724	0.953502	2.20074	16.806	19.5436
1200	3720	0.0925755	0.0806307	0.0388294	0.357	1.27672	0.952436	2.22915	17.3166	33.2924
1320	3720	0.0914456	0.0813973	0.0375716	0.357	1.2558	0.961491	2.21729	16.7556	21.7147
1440	3720	0.0914692	0.0794129	0.0367452	0.357	1.25908	0.938051	2.19713	16.3871	26.7469
1560	3720	0.0918838	0.0811995	0.0385833	0.357	1.26375	0.959155	2.22291	17.2068	25.4164
1680	3720	0.0905292	0.0782923	0.0421101	0.357	1.24425	0.924814	2.16907	18.7797	22.3225
1800	3720	0.0909003	0.0807242	0.0378616	0.357	1.24725	0.95354	2.20079	16.885	19.5423
1920	3720	0.0891719	0.0873889	0.0296777	0.357	1.20784	1.03227	2.24011	13.2353	5.6421
2040	3720	0.0970938	0.0815396	0.00672793	0.357	1.35561	0.963173	2.31878	3.00043	111.7
2160	3720	0.0703878	0.0749822	-0.00400043	0.357	0.913035	0.885714	1.79875	-1.78405	0.00544648
2280	3720	0.0771343	0.072799	0.0188123	0.357	1.02452	0.859926	1.88444	8.38964	0.24925
2400	3720	0.0889983	0.0836997	0.0340656	0.357	1.21004	0.988688	2.19873	15.1921	7.68372
0	3840	0.0852649	0.0745569	0.039477	0.357	1.15854	0.88069	2.03923	17.6054	5.62381
120	3840	0.0889458	0.0787401	0.0397918	0.357	1.21609	0.930104	2.1462	17.7458	12.682
240	3840	0.0906268	0.0813239	0.0385599	0.357	1.24162	0.960624	2.20224	17.1964	16.8363
360	3840	0.0896758	0.0859306	0.0308323	0.357	1.21858	1.01504	2.23362	13.7502	7.74311
480	3840	0.094661	0.0828794	0.0269738	0.357	1.31021	0.978998	2.28921	12.0294	49.8812
600	3840	0.0919284	0.0831614	0.0334051	0.357	1.26169	0.982329	2.24402	14.8975	21.2344
720	3840	0.0927059	0.0831272	0.0349923	0.357	1.27536	0.981926	2.25729	15.6053	27.1371
840	3840	0.0930458	0.0835242	0.0338344	0.357	1.28075	0.986614	2.26736	15.089	28.9909
960	3840	0.0904849	0.0820977	0.0366627	0.357	1.23805	0.969765	2.20781	16.3503	14.8647
1080	3840	0.0901073	0.0799872	0.0404418	0.357	1.23449	0.944835	2.17932	18.0357	16.3181
1200	3840	0.0905013	0.0794469	0.0416659	0.357	1.24212	0.938453	2.18057	18.5816	19.6095
1320	3840	0.0888461	0.0757574	0.039004	0.357	1.21855	0.894871	2.11342	17.3944	16.9892
1440	3840	0.089648	0.0776015	0.0406132	0.357	1.22988	0.916654	2.14654	18.1121	18.0761
1560	3840	0.0897185	0.0778438	0.0420702	0.357	1.23076	0.919516	2.15028	18.7619	18.0222
1680	3840	0.0906964	0.0804646	0.0467697	0.357	1.24406	0.950474	2.19454	20.8577	18.7975
1800	3840	0.0884883	0.0789253	0.0418105	0.357	1.20792	0.932292	2.14021	18.6461	10.6536
1920	3840	0.0801792	0.0873129	0.0321332	0.357	1.0566	1.03137	2.08797	14.3303	0.159908
2040	3840	-0.0814416	0.0410984	-0.0087502	0.357	-0.593512	0.485468	-0.108044	-3.90229	#NUM!
2160	3840	-0.0628922	0.0513831	-0.00436223	0.357	-0.495907	0.606954	0.111047	-1.9454	#NUM!
2280	3840	0.00252849	0.0560629	0.0113174	0.357	0.0265255	0.662233	0.688758	5.04716	1.09277e-109
2400	3840	0.0882934	0.0823662	0.035723	0.357	1.19976	0.972937	2.1727	15.9312	6.91251
0	3960	0.0867525	0.0770798	0.0426759	0.357	1.18058	0.910492	2.09108	19.032	7.15701
120	3960	0.0890853	0.0815164	0.0372186	0.357	1.21461	0.962898	2.1775	16.5982	9.91125
240	3960	0.0901532	0.0811798	0.0365307	0.357	1.23359	0.958922	2.19251	16.2914	14.6445
360	3960	0.0894252	0.0862264	0.0342442	0.357	1.21384	1.01853	2.23237	15.2717	6.90354
480	3960	0.0915916	0.0863251	0.0369457	0.357	1.25123	1.0197	2.27093	16.4765	14.057
600	3960	0.0907081	0.0837027	0.0388183	0.357	1.23963	0.988724	2.22835	17.3116	13.6141
720	3960	0.0893598	0.0821992	0.0372861	0.357	1.21839	0.970964	2.18935	16.6283	10.1318
840	3960	0.0913493	0.0833322	0.0363827	0.357	1.25133	0.984347	2.23567	16.2254	17.3755
960	3960	0.0903212	0.0802681	0.0384865	0.357	1.23781	0.948153	2.18596	17.1637	16.9921
1080	3960	0.0893714	0.0764197	0.0418459	0.357	1.22674	0.902694	2.12943	18.6618	18.7704
1200	3960	0.0891729	0.0768923	0.0429274	0.357	1.22263	0.908277	2.1309	19.1442	16.7027
1320	3960	0.088957	0.0765235	0.041931	0.357	1.2194	0.903921	2.12332	18.6998	16.1944
1440	3960	0.088912	0.0766721	0.0409869	0.357	1.21841	0.905676	2.12408	18.2788	15.6966
1560	3960	0.0909741	0.0804801	0.0406637	0.357	1.24888	0.950657	2.19954	18.1346	20.5123
1680	3960	0.0894738	0.0846065	0.0418468	0.357	1.21696	0.999399	2.21636	18.6622	8.2462
1800	3960	0.0822323	0.0809547	0.0364105	0.357	1.09882	0.956264	2.05508	16.2378	0.8121
1920	3960	-0.0684702	0.0485027	-0.00263488	0.357	-0.527359	0.572929	0.0455704	-1.17507	#NUM!
2040	3960	-0.123221	0.011927	-0.00939709	0.357	-0.743846	0.140885	-0.602961	-4.19078	#NUM!
2160	3960	-0.101955	0.0226283	-0.00351518	0.357	-0.687058	0.267293	-0.419765	-1.56765	#NUM!
2280	3960	-0.0266154	0.0463107	0.0113565	0.357	-0.251539	0.547036	0.295497	5.06462	3.01551e-28
2400	3960	0.0834769	0.0801654	0.0370392	0.357	1.12074	0.94694	2.06768	16.5182	1.47308
0	4080	0.0876144	0.0797283	0.0406052	0.357	1.19175	0.941776	2.13352	18.1085	7.2254
120	4080	0.0890401	0.0839281	0.0342141	0.357	1.21044	0.991386	2.20182	15.2583	7.61559
240	4080	0.0857904	0.0869849	0.029511	0.357	1.1507	1.02749	2.1782	13.1609	1.71364
360	4080	0.0927622	0.087216	0.0301562	0.357	1.27036	1.03022	2.30059	13.4486	18.7604
480	4080	0.0930585	0.0857187	0.0339991	0.357	1.27775	1.01254	2.29029	15.1624	23.6487
600	4080	0.0923071	0.0878419	0.0325621	0.357	1.2615	1.03762	2.29912	14.5216	15.3323
720	4080	0.0898536	0.0857306	0.0351687	0.357	1.22193	1.01268	2.23461	15.684	8.3879
840	4080	0.0888116	0.0861567	0.032545	0.357	1.20338	1.01771	2.22109	14.514	5.62197
960	4080	0.0899229	0.0818456	0.0386719	0.357	1.22864	0.966786	2.19543	17.2463	12.6798
1080	4080	0.0892722	0.0764253	0.0434964	0.357	1.22501	0.902761	2.12777	19.3979	18.1596
1200	4080	0.0891673	0.0756841	0.0439019	0.357	1.22423	0.894005	2.11823	19.5787	19.0366
1320	4080	0.0904487	0.0778119	0.0415406	0.357	1.24353	0.91914	2.16267	18.5257	22.8868
1440	4080	0.0907456	0.0824953	0.0381208	0.357	1.24201	0.974461	2.21647	17.0006	15.5446
1560	4080	0.0870603	0.0900552	0.0232195	0.357	1.16805	1.06376	2.23181	10.3551	2.02806
1680	4080	0.0782133	0.0838508	0.030764	0.357	1.02867	0.990473	2.01914	13.7197	0.0969977
1800	4080	0.0862987	0.0803304	0.0408647	0.357	1.16838	0.948888	2.11727	18.2242	4.22727
1920	4080	-0.0620078	0.0342742	0.00815952	0.357	-0.507919	0.404858	-0.103061	3.63886	#NUM!
2040	4080	-0.0771781	0.0273323	0.000362337	0.357	-0.592682	0.322858	-0.269824	0.16159	#NUM!
2160	4080	-0.022615	0.055618	0.011685	0.357	-0.214116	0.656978	0.442862	5.21111	4.15668e-29
2280	4080	0.0847952	0.0789289	0.0448806	0.357	1.14468	0.932333	2.07701	20.0152	2.83092
2400	4080	0.0886328	0.0738205	0.0522094	0.357	1.21756	0.871992	2.08955	23.2836	19.6844
0	4200	0.0878661	0.0809868	0.0390173	0.357	1.19433	0.956642	2.15097	17.4004	6.89007
120	4200	0.0895661	0.0824581	0.0324357	0.357	1.22159	0.974022	2.19562	14.4652	10.5748
240	4200	0.090749	0.0846362	0.0343014	0.357	1.23901	0.99975	2.23876	15.2972	12.5838
360	4200	0.0909388	0.0847494	0.0344491	0.357	1.24214	1.00109	2.24323	15.3631	13.2419
480	4200	0.0917935	0.0851214	0.0338445	0.357	1.25649	1.00548	2.26197	15.0935	16.8271
600	4200	0.0903715	0.0839865	0.0301867	0.357	1.23338	0.992076	2.22546	13.4622	11.8509
720	4200	0.0849823	0.0845834	0.0305237	0.357	1.14027	0.999127	2.1394	13.6125	1.61992
840	4200	0.0910588	0.078145	0.033536	0.357	1.25372	0.923074	2.17679	14.9559	26.8095
960	4200	0.088857	0.082735	0.0389438	0.357	1.20895	0.977293	2.18625	17.3676	8.08153
1080	4200	0.08969	0.0788064	0.0458491	0.357	1.22891	0.930887	2.15979	20.4471	16.1152
1200	4200	0.089344	0.0786803	0.0484866	0.357	1.22308	0.929397	2.15247	21.6234	14.573
1320	4200	0.0899279	0.0810179	0.0434097	0.357	1.2299	0.95701	2.18691	19.3592	13.828
1440	4200	0.0871627	0.0802366	0.040171	0.357	1.18329	0.947781	2.13107	17.9149	5.82973
1560	4200	0.087388	0.0858324	0.0340278	0.357	1.17944	1.01388	2.19332	15.1752	3.50024
1680	4200	0.0913324	0.0813456	0.0409882	0.357	1.25389	0.96088	2.21477	18.2794	21.0592
1800	4200	0.0883794	0.0776666	0.0450176	0.357	1.2078	0.917423	2.12522	20.0763	11.774
1920	4200	0.0874083	0.0768411	0.0423645	0.357	1.19219	0.907673	2.09986	18.8931	9.25107
2040	4200	0.0873011	0.0783037	0.0384067	0.357	1.18833	0.924949	2.11328	17.1281	7.56991
2160	4200	0.0897296	0.0819304	0.04099	0.357	1.22517	0.967789	2.19296	18.2801	11.7887
2280	4200	0.0875486	0.0727169	0.0547954	0.357	1.2003	0.858955	2.05926	24.4369	15.5799
2400	4200	0.0851591	0.0673894	0.0559148	0.357	1.16636	0.796025	1.96239	24.9361	13.1994
0	4320	0.0897027	0.0802263	0.0347727	0.357	1.22712	0.947659	2.17478	15.5074	13.9377
120	4320	0.0881359	0.0849659	0.0313551	0.357	1.19344	1.00365	2.19708	13.9833	5.00017
240	4320	0.0903449	0.0830614	0.0358908	0.357	1.23424	0.981148	2.21539	16.0061	12.8847
360	4320	0.0915623	0.0832506	0.0339934	0.357	1.25516	0.983383	2.23854	15.1599	18.7475
480	4320	0.0909359	0.0858782	0.0337466	0.357	1.24047	1.01442	2.25489	15.0498	11.8546
600	4320	0.0904298	0.0824662	0.0355299	0.357	1.23656	0.974117	2.21068	15.8451	14.0663
720	4320	0.0908159	0.0786654	0.0393223	0.357	1.24872	0.929221	2.17795	17.5364	23.5189
840	4320	0.090843	0.0805397	0.045718	0.357	1.24651	0.951361	2.19787	20.3886	19.5516
960	4320	0.0896013	0.0786049	0.0456736	0.357	1.22765	0.928507	2.15616	20.3688	15.9914
1080	4320	0.0902848	0.0766794	0.0476781	0.357	1.24229	0.905762	2.14805	21.2628	24.5063
1200	4320	0.0897309	0.0797107	0.0462731	0.357	1.22834	0.941569	2.16991	20.6362	14.8478
1320	4320	0.090262	0.080866	0.0437708	0.357	1.23593	0.955215	2.19114	19.5203	15.6721
1440	4320	0.0891823	0.0809311	0.0425687	0.357	1.21711	0.955985	2.17309	18.9842	10.8857
1560	4320	0.090021	0.0822029	0.0431155	0.357	1.22984	0.971007	2.20085	19.228	12.6291
1680	4320	0.08873	0.0781252	0.0495873	0.357	1.21322	0.92284	2.13606	22.1142	12.6055
1800	4320	0.0885519	0.0745945	0.0513173	0.357	1.21507	0.881134	2.0962	22.8857	17.5559
1920	4320	0.0895124	0.074929	0.0488702	0.357	1.2313	0.885086	2.11639	21.7944	23.1511
2040	4320	0.0894731	0.0777979	0.0488694	0.357	1.22656	0.918974	2.14554	21.7941	16.7139
2160	4320	0.0879433	0.0744317	0.04857	0.357	1.20475	0.879212	2.08396	21.6606	14.5937
2280	4320	0.0865922	0.0684562	0.0552288	0.357	1.18962	0.808627	1.99824	24.6301	18.8815
2400	4320	0.0845095	0.0672389	0.0497964	0.357	1.15542	0.794248	1.94967	22.2075	10.6957
0	4440	0.0907006	0.0834225	0.0314137	0.357	1.2399	0.985414	2.22532	14.0094	13.9642
120	4440	0.0920982	0.0892428	0.0240777	0.357	1.25582	1.05417	2.30999	10.7378	12.6009
240	4440	0.0917389	0.091165	0.0258578	0.357	1.24679	1.07687	2.32366	11.5317	9.40804
360	4440	0.0892792	0.0821735	0.0320269	0.357	1.21703	0.97066	2.18769	14.2829	9.88606
480	4440	0.0913813	0.083991	0.0342692	0.357	1.25093	0.992129	2.24306	15.2829	16.4557
600	4440	0.0908413	0.0838061	0.0362852	0.357	1.2418	0.989944	2.23174	16.1819	14.0737
720	4440	0.0903706	0.0807873	0.0438117	0.357	1.23793	0.954286	2.19221	19.5385	16.3679
840	4440	0.0882115	0.0764918	0.0483068	0.357	1.20653	0.903546	2.11007	21.5432	12.6645
960	4440	0.0874198	0.074038	0.048192	0.357	1.19625	0.874561	2.07081	21.492	12.7864
1080	4440	0.0871598	0.0757493	0.0526624	0.357	1.18941	0.894775	2.08419	23.4856	9.60387
1200	4440	0.0893705	0.0772939	0.0524854	0.357	1.22549	0.91302	2.13851	23.4067	17.0633
1320	4440	0.0884548	0.0767075	0.0479587	0.357	1.21044	0.906094	2.11653	21.3879	13.4219
1440	4440	0.0893418	0.0799198	0.0396195	0.357	1.22129	0.944039	2.16533	17.6689	12.7688
1560	4440	0.0861334	0.0836638	0.0388955	0.357	1.16103	0.988264	2.14929	17.3461	2.76891
1680	4440	0.0893495	0.077039	0.053321	0.357	1.22549	0.91001	2.1355	23.7793	17.4206
1800	4440	0.0888665	0.0745457	0.0520605	0.357	1.2206	0.880558	2.10116	23.2172	19.582
1920	4440	0.0896567	0.0732754	0.0540235	0.357	1.23615	0.865552	2.1017	24.0926	29.16
2040	4440	0.0885222	0.0750354	0.0478011	0.357	1.21394	0.886343	2.10028	21.3177	16.5414
2160	4440	0.0886177	0.0748178	0.0499011	0.357	1.2159	0.883773	2.09967	22.2542	17.4968
2280	4440	0.0888493	0.0753309	0.0494927	0.357	1.2192	0.889834	2.10903	22.072	17.833
2400	4440	0.0830135	0.0766082	0.0427778	0.357	1.11761	0.904921	2.02253	19.0775	1.87026
0	4560	0.0899695	0.0820501	0.0351624	0.357	1.22916	0.969203	2.19836	15.6812	12.6105
120	4560	0.0889282	0.0798261	0.0333467	0.357	1.21426	0.942931	2.15719	14.8715	11.2268
240	4560	0.0918873	0.0823505	0.0376382	0.357	1.26215	0.97275	2.2349	16.7853	22.6994
360	4560	0.0907928	0.0823609	0.0389059	0.357	1.24303	0.972873	2.2159	17.3507	15.9985
480	4560	0.0919078	0.0808666	0.0400181	0.357	1.26466	0.955223	2.21988	17.8467	26.4733
600	4560	0.0909899	0.0818241	0.0350426	0.357	1.24723	0.966533	2.21376	15.6278	17.9925
720	4560	0.0904389	0.0852474	0.0328187	0.357	1.23275	1.00697	2.23972	14.636	10.6997
840	4560	0.0921038	0.080764	0.0417633	0.357	1.26824	0.95401	2.22225	18.625	28.4233
960	4560	0.0901419	0.0774119	0.0482674	0.357	1.23875	0.914415	2.15316	21.5256	21.6452
1080	4560	0.0888731	0.0746012	0.0565382	0.357	1.22064	0.881214	2.10185	25.2141	19.5028
1200	4560	0.0867672	0.0700934	0.058957	0.357	1.1904	0.827966	2.01837	26.2928	16.3672
1320	4560	0.0876389	0.0714007	0.0562653	0.357	1.20368	0.843408	2.04709	25.0924	18.7561
1440	4560	0.0882697	0.0804842	0.0435363	0.357	1.20198	0.950706	2.15268	19.4157	8.36313
1560	4560	0.0905771	0.0785105	0.0439221	0.357	1.24478	0.927391	2.17217	19.5878	22.1535
1680	4560	0.0898165	0.0759342	0.0563688	0.357	1.23518	0.896959	2.13213	25.1386	22.864
1800	4560	0.0884983	0.0729727	0.0549219	0.357	1.21641	0.861977	2.07838	24.4933	20.75
1920	4560	0.0881771	0.0733995	0.0505066	0.357	1.21024	0.867019	2.07726	22.5242	17.765
2040	4560	0.0885663	0.0732047	0.0472644	0.357	1.21726	0.864717	2.08198	21.0783	20.6611
2160	4560	0.089575	0.0780936	0.0485115	0.357	1.22792	0.922467	2.15038	21.6344	16.7424
2280	4560	0.086723	0.0798662	0.0408799	0.357	1.17627	0.943406	2.11967	18.231	5.18809
2400	4560	-0.058792	0.0276028	0.0130506	0.357	-0.49551	0.326053	-0.169458	5.8201	#NUM!
0	4680	0.090713	0.0801105	0.043296	0.357	1.24486	0.946291	2.19115	19.3085	19.5974
120	4680	0.090561	0.0840559	0.0414967	0.357	1.23657	0.992895	2.22947	18.5061	12.5276
240	4680	0.0912349	0.0793974	0.0420833	0.357	1.255	0.937868	2.19287	18.7677	24.8906
360	4680	0.0906879	0.0801219	0.0448576	0.357	1.2444	0.946427	2.19083	20.0049	19.4171
480	4680	0.0906183	0.0824068	0.043839	0.357	1.23992	0.973416	2.21334	19.5507	15.0481
600	4680	0.0920446	0.0847293	0.033661	0.357	1.26144	1.00085	2.26229	15.0116	18.9232
720	4680	0.0852147	0.0843108	0.0204985	0.357	1.14457	0.995907	2.14047	9.14161	1.82474
840	4680	0.0821689	0.0927431	0.0245336	0.357	1.08247	1.09551	2.17799	10.9412	0.213693
960	4680	0.0890828	0.0915518	0.0321146	0.357	1.20046	1.08144	2.2819	14.322	3.66538
1080	4680	0.085586	0.0929512	0.0431889	0.357	1.13919	1.09797	2.23716	19.2608	0.864869
1200	4680	0.086122	0.0722314	0.0556839	0.357	1.17637	0.853221	2.02959	24.8331	10.102
1320	4680	0.0847342	0.0690719	0.0532872	0.357	1.15682	0.815899	1.97272	23.7642	9.14137
1440	4680	0.086188	0.0742755	0.0463311	0.357	1.17472	0.877366	2.05209	20.6621	8.10308
1560	4680	0.0876694	0.0752423	0.0547639	0.357	1.1989	0.888787	2.08768	24.4228	12.1257
1680	4680	0.087831	0.0720462	0.0542418	0.357	1.20612	0.851033	2.05715	24.19	18.5299
1800	4680	0.0880468	0.0715216	0.0522135	0.357	1.21059	0.844836	2.05542	23.2854	21.1718
1920	4680	0.088294	0.0727902	0.0490021	0.357	1.21311	0.859822	2.07294	21.8533	19.8119
2040	4680	0.0880822	0.0752094	0.0500309	0.357	1.20608	0.888398	2.09447	22.3121	13.9995
2160	4680	0.0868288	0.0779415	0.0416789	0.357	1.18071	0.92067	2.10138	18.5874	6.67253
2280	4680	0.0468833	0.0659602	0.0350294	0.357	0.569687	0.779144	1.34883	15.6219	4.53951e-11
2400	4680	-0.128636	0.00639063	-0.00836709	0.357	-0.759243	0.0754882	-0.683755	-3.73144	#NUM!

## Sheet: P10C
X (microns)	Y (microns)	A4520 (OH)	A5230 (H2Om)	A2350 (CO2)	thickness (mm)	[OH] wt%	[H2Om] wt%	[H2Ot] wt%	[CO2] ppm	Q (K/s)
0	0	0.0608584	0.0218902	0.000480413	0.33	0.895037	0.27973	1.17477	0.231777	97.2332
120	0	0.0609496	0.022414	0.000611663	0.33	0.896055	0.286424	1.18248	0.295099	81.7491
240	0	0.060492	0.0210505	-0.00751813	0.33	0.889524	0.269	1.15852	-3.62715	117.23
360	0	0.0596761	0.0211877	-0.00389516	0.33	0.875041	0.270753	1.14579	-1.87924	75.8166
480	0	0.0608216	0.0207672	0.00315107	0.33	0.89565	0.26538	1.16103	1.52025	153.376
600	0	0.0599664	0.0219295	0.00322752	0.33	0.879311	0.280232	1.15954	1.55713	63.2581
720	0	0.0598489	0.0209033	0.000282645	0.33	0.878386	0.267119	1.1455	0.136363	93.0315
840	0	0.0597135	0.0192043	-0.00630531	0.33	0.877883	0.245408	1.12329	-3.04202	187.199
960	0	0.0593465	0.020835	0.00288463	0.33	0.869658	0.266246	1.1359	1.3917	75.7533
1080	0	0.0599489	0.0209914	-0.00142899	0.33	0.880043	0.268244	1.14829	-0.689423	93.7798
1200	0	0.0596212	0.0191381	-0.00431255	0.33	0.876336	0.244562	1.1209	-2.0806	185.187
1320	0	0.0587966	0.0204796	0.000696152	0.33	0.860435	0.261704	1.12214	0.335861	68.3276
1440	0	0.0588164	0.0215648	0.000779755	0.33	0.859603	0.275571	1.13517	0.376196	42.5015
1560	0	0.0589063	0.0220613	0.00281693	0.33	0.86063	0.281917	1.14255	1.35904	35.785
1680	0	0.0586494	0.0216927	0.000410922	0.33	0.856553	0.277206	1.13376	0.198251	36.9884
1800	0	0.057988	0.0203358	-0.0131048	0.33	0.846508	0.259867	1.10637	-6.32248	49.1652
1920	0	0.0585036	0.0220345	-0.00153513	0.33	0.853646	0.281574	1.13522	-0.740631	29.6017
2040	0	0.056083	0.0229382	-0.00124345	0.33	0.810883	0.293123	1.10401	-0.599909	5.41586
2160	0	0.0586015	0.0211032	-0.0100767	0.33	0.856357	0.269673	1.12603	-4.86154	46.9186
2280	0	0.058945	0.0234978	0.000496443	0.33	0.859742	0.300273	1.16001	0.239511	19.8562
2400	0	0.0588036	0.0229289	-0.00178187	0.33	0.857899	0.293004	1.1509	-0.859671	23.4536
2520	0	0.0588107	0.0230568	0.000657192	0.33	0.857882	0.294638	1.15252	0.317065	22.3
2640	0	0.0584488	0.0225072	-0.00342682	0.33	0.852183	0.287615	1.1398	-1.65328	23.4467
2760	0	0.0582248	0.0229337	0.0014428	0.33	0.847834	0.293065	1.1409	0.696087	17.3897
2880	0	0.0589137	0.0213396	0.00332638	0.33	0.861544	0.272694	1.13424	1.60483	49.2224
3000	0	0.0577004	0.0204742	0.00197573	0.33	0.841368	0.261636	1.103	0.953196	39.9184
3120	0	0.0578942	0.0213143	-0.00144823	0.33	0.843834	0.272371	1.1162	-0.698704	29.9391
3240	0	0.0567375	0.0232441	0.00644799	0.33	0.821807	0.297031	1.11884	3.11086	6.82906
3360	0	0.056973	0.023407	0.00202519	0.33	0.825688	0.299114	1.1248	0.977059	7.24512
3480	0	0.0570147	0.0221824	0.00184199	0.33	0.827695	0.283464	1.11116	0.888676	12.7548
3600	0	0.0574588	0.0217298	0.000284568	0.33	0.835847	0.277681	1.11353	0.137291	19.8104
3720	0	0.057117	0.0191435	-0.00256423	0.33	0.832666	0.244631	1.0773	-1.23712	56.3358
3840	0	0.0568606	0.0201949	0.000907868	0.33	0.827126	0.258066	1.08519	0.438004	29.6359
3960	0	0.0569927	0.0194766	-0.00625938	0.33	0.830165	0.248887	1.07905	-3.01986	44.928
4080	0	0.0560056	0.018623	-0.00558534	0.33	0.814019	0.237979	1.052	-2.69467	41.531
4200	0	0.0548475	0.0186156	0.000983015	0.33	0.79415	0.237885	1.03203	0.474259	22.4786
4320	0	0.054433	0.0177453	-0.00209391	0.33	0.787942	0.226763	1.0147	-1.01022	28.7207
4440	0	0.0542237	0.018058	0.00668395	0.33	0.784054	0.230759	1.01481	3.22469	21.5423
4560	0	0.0541179	0.0181833	0.00647002	0.33	0.782125	0.23236	1.01448	3.12149	18.9584
4680	0	0.0531204	0.0175549	0.00545068	0.33	0.765785	0.22433	0.990115	2.6297	15.3196
4800	0	0.0534015	0.0182667	0.00656213	0.33	0.769855	0.233426	1.00328	3.16592	12.0418
4920	0	0.0528258	0.0174521	0.00110209	0.33	0.760893	0.223017	0.983909	0.531707	13.7088
5040	0	0.0528797	0.016803	-0.00171414	0.33	0.762439	0.214722	0.97716	-0.826993	20.7188
5160	0	0.0523538	0.0169958	0.00669327	0.33	0.75335	0.217186	0.970536	3.2292	13.6156
5280	0	0.0512595	0.0178066	0.00847501	0.33	0.734148	0.227547	0.961694	4.0888	4.30548
5400	0	0.0449474	0.0167744	0.0089501	0.33	0.631002	0.214357	0.84536	4.31801	0.090719
0	119.944	0.0604775	0.024928	0.00516865	0.33	0.88494	0.31855	1.20349	2.49363	24.125
120	119.944	0.0592161	0.0236806	-0.00017193	0.33	0.864265	0.30261	1.16687	-0.0829481	21.1297
240	119.944	0.0608518	0.0220047	0.00217277	0.33	0.894793	0.281193	1.17599	1.04826	92.4649
360	119.944	0.0604329	0.0214231	-0.0002563	0.33	0.888068	0.273761	1.16183	-0.123653	97.3804
480	119.944	0.059547	0.0206003	0.00328352	0.33	0.873425	0.263247	1.13667	1.58414	92.3598
600	119.944	0.0596763	0.0215957	-0.00291932	0.33	0.874595	0.275967	1.15056	-1.40844	63.5618
720	119.944	0.0595646	0.0197644	-0.0027553	0.33	0.874653	0.252565	1.12722	-1.3293	135.499
840	119.944	0.0592148	0.02008	-9.7841e-05	0.33	0.86818	0.256598	1.12478	-0.0472038	99.883
960	119.944	0.0595187	0.0211033	0.00761539	0.33	0.872377	0.269675	1.14205	3.67407	73.0266
1080	119.944	0.0594913	0.0214846	0.00794478	0.33	0.871478	0.274547	1.14603	3.83299	61.0582
1200	119.944	0.0593893	0.0210502	0.00637406	0.33	0.870171	0.268996	1.13917	3.07519	70.3044
1320	119.944	0.0584245	0.0210122	0.000327904	0.33	0.853374	0.26851	1.12188	0.158198	44.79
1440	119.944	0.0589513	0.0226363	0.0084845	0.33	0.860789	0.289264	1.15005	4.09338	28.6031
1560	119.944	0.059299	0.0225626	0.00811972	0.33	0.866934	0.288323	1.15526	3.91739	35.0753
1680	119.944	0.0578034	0.0215283	0.00372685	0.33	0.842029	0.275106	1.11713	1.79803	25.9447
1800	119.944	0.0588361	0.0237649	0.0090201	0.33	0.857556	0.303687	1.16124	4.35178	16.8123
1920	119.944	0.0589148	0.0218583	-0.00350533	0.33	0.860998	0.279322	1.14032	-1.69116	39.2417
2040	119.944	0.0581897	0.0223764	0.00659337	0.33	0.847824	0.285944	1.13377	3.181	21.7299
2160	119.944	0.0584055	0.025151	0.00841713	0.33	0.848579	0.321399	1.16998	4.06088	7.61889
2280	119.944	0.0575973	0.0235067	0.00987469	0.33	0.836354	0.300388	1.13674	4.76408	9.75755
2400	119.944	0.0581441	0.0234821	0.00315122	0.33	0.845845	0.300073	1.14592	1.52032	13.1976
2520	119.944	0.0563788	0.0184874	0.0105425	0.33	0.820593	0.236246	1.05684	5.08627	53.9576
2640	119.944	0.0589199	0.022914	0.00953828	0.33	0.859939	0.292814	1.15275	4.60178	25.0308
2760	119.944	0.0588982	0.021786	-1.56462e-07	0.33	0.860787	0.278399	1.13919	-7.54858e-05	40.1648
2880	119.944	0.0583238	0.0229039	0.00837848	0.33	0.849584	0.292685	1.14227	4.04223	18.54
3000	119.944	0.0581457	0.0231357	0.00957955	0.33	0.846244	0.295646	1.14189	4.62169	15.3046
3120	119.944	0.0576718	0.0238653	0.0116253	0.33	0.83726	0.30497	1.14223	5.60867	8.71996
3240	119.944	0.0575532	0.0233974	0.0110039	0.33	0.835709	0.29899	1.1347	5.30886	9.98646
3360	119.944	0.0561434	0.023784	0.00929442	0.33	0.811042	0.303931	1.11497	4.48413	3.84718
3480	119.944	0.0571952	0.0223981	0.00564046	0.33	0.830583	0.286221	1.1168	2.72126	12.7593
3600	119.944	0.0564217	0.0220962	0.0072758	0.33	0.817574	0.282363	1.09994	3.51024	9.60075
3720	119.944	0.0572559	0.0219179	0.00807522	0.33	0.832139	0.280085	1.11222	3.89592	16.3497
3840	119.944	0.0565737	0.0213183	0.0065711	0.33	0.821002	0.272423	1.09342	3.17025	14.9516
3960	119.944	0.0562961	0.0233005	0.00816677	0.33	0.814163	0.297752	1.11191	3.94009	5.19788
4080	119.944	0.056552	0.023256	0.00952861	0.33	0.818605	0.297184	1.11579	4.59711	6.12456
4200	119.944	0.0555807	0.021606	0.00650716	0.33	0.80365	0.276099	1.07975	3.1394	7.54193
4320	119.944	0.0558853	0.0208262	0.00828093	0.33	0.809674	0.266134	1.07581	3.99517	12.981
4440	119.944	0.0549609	0.0211793	0.00838248	0.33	0.793488	0.270646	1.06413	4.04416	6.49918
4560	119.944	0.054716	0.0215614	0.0101316	0.33	0.788923	0.275529	1.06445	4.88805	4.68047
4680	119.944	0.0543817	0.019715	-0.00107069	0.33	0.785087	0.251934	1.03702	-0.51656	9.72691
4800	119.944	0.0534735	0.0193553	0.00658765	0.33	0.770003	0.247338	1.01734	3.17824	6.92806
4920	119.944	0.0529852	0.0189499	0.00659594	0.33	0.762128	0.242157	1.00428	3.18224	6.45564
5040	119.944	0.0528094	0.0196346	0.00715655	0.33	0.758487	0.250907	1.00939	3.45271	3.99665
5160	119.944	0.0530246	0.0194134	0.00440749	0.33	0.762342	0.24808	1.01042	2.12641	5.13421
5280	119.944	0.0511927	0.0198244	0.00695692	0.33	0.73112	0.253331	0.984452	3.35639	1.28798
5400	119.944	0.0450707	0.0185717	0.00660798	0.33	0.631503	0.237324	0.868827	3.18804	0.0287699
0	239.889	0.0588182	0.0232102	0.00853556	0.33	0.857846	0.296598	1.15444	4.11802	20.9872
120	239.889	0.0611821	0.0233567	0.0054978	0.33	0.899091	0.29847	1.19756	2.65243	62.3453
240	239.889	0.0607044	0.0246454	0.00408269	0.33	0.889236	0.314939	1.20417	1.96971	30.0533
360	239.889	0.0605502	0.0239837	0.0105556	0.33	0.887269	0.306482	1.19375	5.09257	36.122
480	239.889	0.0588976	0.0227127	0.010603	0.33	0.859769	0.290241	1.15001	5.11546	26.9527
600	239.889	0.0591178	0.0211588	-0.000391349	0.33	0.865306	0.270384	1.13569	-0.188808	58.8584
720	239.889	0.0591942	0.0217406	0.00683074	0.33	0.866004	0.277818	1.14382	3.29551	47.3597
840	239.889	0.059009	0.0208525	0.00462268	0.33	0.863737	0.26647	1.13021	2.23023	63.9836
960	239.889	0.0585671	0.0225054	0.00777559	0.33	0.854241	0.287592	1.14183	3.75136	24.9208
1080	239.889	0.0594267	0.0232859	0.00811335	0.33	0.868371	0.297566	1.16594	3.91432	27.6258
1200	239.889	0.0587489	0.0224166	0.00896567	0.33	0.857502	0.286458	1.14396	4.32552	28.383
1320	239.889	0.0598667	0.0222022	0.0058502	0.33	0.877262	0.283717	1.16098	2.82245	53.7774
1440	239.889	0.0593834	0.0232146	0.00374965	0.33	0.867695	0.296655	1.16435	1.80903	27.8467
1560	239.889	0.0589823	0.0221152	0.009671	0.33	0.861897	0.282605	1.1445	4.66581	36.3044
1680	239.889	0.0596786	0.0235765	0.0109882	0.33	0.872452	0.301279	1.17373	5.30132	27.789
1800	239.889	0.0588112	0.0230497	0.0106457	0.33	0.857899	0.294548	1.15245	5.13605	22.3726
1920	239.889	0.0585679	0.0232086	0.0104083	0.33	0.853496	0.296577	1.15007	5.02151	18.4748
2040	239.889	0.0579317	0.0229386	0.00498428	0.33	0.842746	0.293128	1.13587	2.40468	14.8872
2160	239.889	0.0592932	0.0233585	0.00126648	0.33	0.865961	0.298493	1.16445	0.611018	25.0817
2280	239.889	0.0590018	0.0230585	0.00503914	0.33	0.861208	0.29466	1.15587	2.43115	24.5474
2400	239.889	0.0595424	0.0243099	0.00817044	0.33	0.869266	0.310651	1.17992	3.94186	19.3056
2520	239.889	0.0579261	0.0289376	0.00960261	0.33	0.836232	0.369787	1.20602	4.63281	1.35389
2640	239.889	0.0582139	0.0238204	0.011612	0.33	0.846691	0.304396	1.15109	5.60227	11.8755
2760	239.889	0.0574218	0.0222388	-0.00478493	0.33	0.834666	0.284185	1.11885	-2.30851	15.4592
2880	239.889	0.0551671	0.0191451	0.00512449	0.33	0.799083	0.244651	1.04373	2.47233	20.2806
3000	239.889	0.0560688	0.0211273	0.00264663	0.33	0.812515	0.269981	1.0825	1.27687	12.4299
3120	239.889	0.0576687	0.0207557	-0.00168894	0.33	0.840518	0.265232	1.10575	-0.814836	34.4689
3240	239.889	0.0566492	0.0207253	-0.00534211	0.33	0.822922	0.264844	1.08777	-2.57732	20.586
3360	239.889	0.0560679	0.0224348	0.00551102	0.33	0.811145	0.28669	1.09784	2.65881	6.74938
3480	239.889	0.056214	0.0219293	0.00568654	0.33	0.814177	0.280229	1.09441	2.74349	9.24289
3600	239.889	0.055988	0.0216429	0.0029751	0.33	0.810594	0.27657	1.08716	1.43535	9.31597
3720	239.889	0.0560927	0.019117	-0.00983559	0.33	0.815007	0.244292	1.0593	-4.74522	33.7667
3840	239.889	0.0560544	0.0208816	0.000846416	0.33	0.812522	0.266841	1.07936	0.408357	13.8684
3960	239.889	0.0549445	0.0216131	0.0057888	0.33	0.792768	0.276189	1.06896	2.79283	5.21736
4080	239.889	0.0495395	0.0212913	0.0054262	0.33	0.702242	0.272077	0.974318	2.61789	0.181584
4200	239.889	0.0549169	0.0204963	-0.00419501	0.33	0.79343	0.261918	1.05535	-2.0239	8.8766
4320	239.889	0.0548774	0.0205936	0.00214617	0.33	0.792657	0.263161	1.05582	1.03543	8.26801
4440	239.889	0.0548824	0.0197609	0.00463226	0.33	0.793585	0.252521	1.04611	2.23485	12.6187
4560	239.889	0.0531462	0.0207735	0.00120331	0.33	0.763064	0.265461	1.02852	0.580543	2.69652
4680	239.889	0.0531093	0.0187634	-0.00321656	0.33	0.764413	0.239773	1.00419	-1.55184	7.70396
4800	239.889	0.0529714	0.0181307	-0.00286299	0.33	0.762695	0.231689	0.994384	-1.38126	10.1124
4920	239.889	0.0526056	0.0183617	0.00599062	0.33	0.756282	0.234641	0.990923	2.8902	7.13826
5040	239.889	0.052385	0.0180054	-0.00107893	0.33	0.752902	0.230088	0.982989	-0.520535	7.66336
5160	239.889	0.0519704	0.0195565	0.00294344	0.33	0.74442	0.249909	0.994329	1.42007	2.47154
5280	239.889	0.0515728	0.0194343	0.00367428	0.33	0.73786	0.248347	0.986207	1.77267	2.05168
5400	239.889	0.0450461	0.0177473	0.00342821	0.33	0.631791	0.226789	0.85858	1.65395	0.0494333
0	359.833	0.05927	0.0201371	0.00538008	0.33	0.869083	0.257328	1.12641	2.59564	99.8729
120	359.833	0.0598594	0.0217168	-0.00495842	0.33	0.87767	0.277514	1.15518	-2.39221	65.8212
240	359.833	0.0593343	0.021628	0.00238357	0.33	0.868575	0.276379	1.14495	1.14996	53.2181
360	359.833	0.0578209	0.0204017	0.00283268	0.33	0.843535	0.260709	1.10424	1.36664	43.8679
480	359.833	0.0581788	0.0207423	0.000354677	0.33	0.849389	0.265062	1.11445	0.171115	44.8166
600	359.833	0.0584252	0.0204487	-0.00263774	0.33	0.853993	0.261309	1.1153	-1.27259	57.8814
720	359.833	0.05843	0.020781	0.00923765	0.33	0.853718	0.265556	1.11927	4.45674	49.86
840	359.833	0.057949	0.019575	-0.00216875	0.33	0.846645	0.250145	1.09679	-1.04632	68.9868
960	359.833	0.0588717	0.0206417	0.000428468	0.33	0.861571	0.263776	1.12535	0.206716	65.8352
1080	359.833	0.0578171	0.020798	0.00253693	0.33	0.843047	0.265773	1.10882	1.22395	36.443
1200	359.833	0.0585206	0.0216049	0.00307515	0.33	0.854406	0.276084	1.13049	1.48362	36.0582
1320	359.833	0.0578779	0.0206386	0.00419876	0.33	0.844272	0.263737	1.10801	2.02571	40.4416
1440	359.833	0.0583712	0.0220774	0.00854649	0.33	0.851297	0.282123	1.13342	4.12328	27.1681
1560	359.833	0.0590078	0.0224658	0.00820066	0.33	0.861959	0.287086	1.14904	3.95644	31.6365
1680	359.833	0.0571896	0.0197328	-0.00181609	0.33	0.833302	0.252162	1.08546	-0.876181	43.8336
1800	359.833	0.0570755	0.0227667	-0.00387219	0.33	0.828129	0.290931	1.11906	-1.86815	10.153
1920	359.833	0.0582036	0.0215139	0.000715077	0.33	0.848992	0.274922	1.12391	0.344992	32.0212
2040	359.833	0.0572998	0.0210177	0.00249252	0.33	0.83385	0.268581	1.10243	1.20252	25.2573
2160	359.833	0.0566632	0.0216385	0.00275496	0.33	0.822207	0.276514	1.09872	1.32914	13.5227
2280	359.833	0.0578845	0.0234522	0.00540489	0.33	0.84138	0.299691	1.14107	2.60761	11.6492
2400	359.833	0.0573489	0.0217779	-0.00064341	0.33	0.833895	0.278295	1.11219	-0.310415	18.2967
2520	359.833	0.054369	0.0125778	-0.00120199	0.33	0.792036	0.160729	0.952764	-0.579903	644.104
2640	359.833	0.0581588	0.0215049	0.00459241	0.33	0.848222	0.274806	1.12303	2.21562	31.4296
2760	359.833	0.0571837	0.0211164	-0.00260019	0.33	0.831739	0.269842	1.10158	-1.25447	22.7115
2880	359.833	0.0572979	0.0209255	0.00609133	0.33	0.833915	0.267403	1.10132	2.93878	26.3355
3000	359.833	0.0572336	0.0212709	0.00562702	0.33	0.832439	0.271816	1.10425	2.71478	21.7074
3120	359.833	0.0566959	0.0237514	0.00480473	0.33	0.82056	0.303514	1.12407	2.31806	5.34446
3240	359.833	0.0572197	0.021745	0.00185785	0.33	0.831697	0.277874	1.10957	0.896329	17.347
3360	359.833	0.0559763	0.0210762	0.00440633	0.33	0.810978	0.269328	1.08031	2.12585	12.1046
3480	359.833	0.0565044	0.0197812	0.00510845	0.33	0.821412	0.25278	1.07419	2.46459	30.0859
3600	359.833	0.0551478	0.0190073	-0.00450622	0.33	0.798892	0.24289	1.04178	-2.17404	21.556
3720	359.833	0.0553293	0.0208843	0.00266622	0.33	0.800085	0.266876	1.06696	1.28633	9.25963
3840	359.833	0.0553126	0.021002	0.00575623	0.33	0.79968	0.26838	1.06806	2.77711	8.66207
3960	359.833	0.0544133	0.0221758	0.00482874	0.33	0.783152	0.28338	1.06653	2.32964	2.90756
4080	359.833	0.055986	0.0198375	0.00475665	0.33	0.812427	0.253499	1.06593	2.29486	22.2394
4200	359.833	0.055091	0.0231733	0.00657505	0.33	0.793681	0.296126	1.08981	3.17216	2.73285
4320	359.833	0.0548896	0.0211022	0.00793228	0.33	0.79235	0.26966	1.06201	3.82696	6.47731
4440	359.833	0.0532314	0.020254	0.00488469	0.33	0.765015	0.258821	1.02384	2.35664	3.72159
4560	359.833	0.0534582	0.0197354	0.0059021	0.33	0.769368	0.252195	1.02156	2.84749	5.60665
4680	359.833	0.0530914	0.0190103	0.00874959	0.33	0.763866	0.242929	1.00679	4.22127	6.65467
4800	359.833	0.052958	0.0192162	0.00381178	0.33	0.761408	0.245559	1.00697	1.83901	5.48952
4920	359.833	0.0522786	0.0185337	0.00227317	0.33	0.750596	0.236839	0.987434	1.0967	5.30969
5040	359.833	0.052179	0.0192089	0.00711063	0.33	0.748265	0.245466	0.993731	3.43055	3.41678
5160	359.833	0.0517445	0.0190561	0.00642303	0.33	0.741102	0.243514	0.984617	3.09881	2.83177
5280	359.833	0.0515438	0.0202208	0.00813287	0.33	0.736624	0.258397	0.995021	3.92374	1.30399
5400	359.833	0.0466969	0.0183679	0.0101199	0.33	0.658104	0.234719	0.892824	4.88238	0.122801
0	479.778	0.0581564	0.0203045	0.00253686	0.33	0.84947	0.259467	1.10894	1.22392	54.2167
120	479.778	0.0581006	0.0209368	0.0120988	0.33	0.847821	0.267547	1.11537	5.83711	39.4421
240	479.778	0.0581146	0.02111	0.00965838	0.33	0.847879	0.26976	1.11764	4.65972	36.7169
360	479.778	0.056769	0.0207052	0.0123334	0.33	0.82501	0.264587	1.0896	5.95031	22.1446
480	479.778	0.0572763	0.0199108	0.00795546	0.33	0.834616	0.254436	1.08905	3.83814	42.0447
600	479.778	0.0568256	0.0202726	0.0120215	0.33	0.826439	0.25906	1.0855	5.79982	28.0339
720	479.778	0.0568858	0.0209367	0.013192	0.33	0.826782	0.267546	1.09433	6.36452	21.1169
840	479.778	0.0570329	0.0212471	0.00972	0.33	0.828995	0.271512	1.10051	4.68945	19.7476
960	479.778	0.0576901	0.0217425	0.0110169	0.33	0.839838	0.277843	1.11768	5.31515	22.2217
1080	479.778	0.0575811	0.0204415	0.00768343	0.33	0.839333	0.261218	1.10055	3.7069	38.1604
1200	479.778	0.0574326	0.0210971	0.00280525	0.33	0.836064	0.269596	1.10566	1.35341	26.0827
1320	479.778	0.0580547	0.0204836	-0.00418	0.33	0.847509	0.261755	1.10926	-2.01666	47.4574
1440	479.778	0.058019	0.0205056	0.00704816	0.33	0.846866	0.262036	1.1089	3.40041	46.1519
1560	479.778	0.05805	0.0210271	-0.00278758	0.33	0.846845	0.268701	1.11555	-1.34488	36.9052
1680	479.778	0.0575633	0.021459	0.00702442	0.33	0.837943	0.27422	1.11216	3.38896	23.6506
1800	479.778	0.0579747	0.0232205	0.00873211	0.33	0.843188	0.29673	1.13992	4.21284	13.4901
1920	479.778	0.0578454	0.020834	-0.00126702	0.33	0.843499	0.266233	1.10973	-0.611277	36.3601
2040	479.778	0.0578924	0.0215313	-0.000263169	0.33	0.843569	0.275144	1.11871	-0.126967	27.1202
2160	479.778	0.0587738	0.021731	0.000424981	0.33	0.858679	0.277696	1.13637	0.205034	38.6891
2280	479.778	0.0569339	0.0225258	0.00576749	0.33	0.825941	0.287852	1.11379	2.78255	10.4642
2400	479.778	0.0582485	0.0219483	0.0083574	0.33	0.849305	0.280473	1.12978	4.03206	27.0158
2520	479.778	0.0579383	0.0216138	0.0108141	0.33	0.844279	0.276198	1.12048	5.21732	26.7571
2640	479.778	0.0574816	0.0216902	0.000585936	0.33	0.836283	0.277174	1.11346	0.282687	20.4101
2760	479.778	0.0563661	0.0207709	0.00137876	0.33	0.817997	0.265427	1.08342	0.665188	17.3149
2880	479.778	0.0569717	0.0209459	0.00217871	0.33	0.828256	0.267663	1.09592	1.05113	21.9999
3000	479.778	0.0574842	0.0226352	0.00164697	0.33	0.835324	0.289251	1.12458	0.794585	13.4071
3120	479.778	0.0497393	0.0174102	0.00209728	0.33	0.709115	0.222481	0.931596	1.01184	2.04679
3240	479.778	0.0471014	0.0247763	0.00606757	0.33	0.659145	0.316611	0.975756	2.92732	0.00411787
3360	479.778	0.0556857	0.0227531	0.00904329	0.33	0.804268	0.290757	1.09502	4.36297	4.69279
3480	479.778	0.0562094	0.021425	0.00433174	0.33	0.814622	0.273785	1.08841	2.08987	11.6647
3600	479.778	0.0558711	0.0199891	0.00376663	0.33	0.810295	0.255436	1.06573	1.81722	19.3929
3720	479.778	0.0551308	0.0193994	0.00923368	0.33	0.798202	0.247901	1.0461	4.45483	17.4368
3840	479.778	0.0552	0.0196882	0.0102661	0.33	0.799093	0.251591	1.05068	4.95289	15.6299
3960	479.778	0.0556085	0.0214594	0.00793514	0.33	0.804277	0.274225	1.0785	3.82834	8.21455
4080	479.778	0.0547572	0.0195345	0.00560262	0.33	0.791676	0.249627	1.0413	2.70301	13.214
4200	479.778	0.0546292	0.02075	0.0102914	0.33	0.788263	0.26516	1.05342	4.96512	6.62992
4320	479.778	0.0536771	0.020389	0.0116005	0.33	0.772434	0.260547	1.03298	5.59672	4.54214
4440	479.778	0.0538001	0.0192999	0.00270894	0.33	0.775602	0.24663	1.02223	1.30694	8.64415
4560	479.778	0.0532379	0.0187868	-0.00512227	0.33	0.766569	0.240072	1.00664	-2.47126	8.20664
4680	479.778	0.0525812	0.0182586	0.0073615	0.33	0.75597	0.233323	0.989293	3.55158	7.45832
4800	479.778	0.0527375	0.0190263	0.0123715	0.33	0.757865	0.243133	1.001	5.96865	5.33126
4920	479.778	0.0518414	0.0183472	0.00164208	0.33	0.74341	0.234455	0.977865	0.792227	4.51125
5040	479.778	0.0514787	0.0178099	0.0102304	0.33	0.737825	0.227589	0.965413	4.9357	4.93023
5160	479.778	0.051644	0.0189453	0.00797761	0.33	0.73952	0.242098	0.981618	3.84883	2.82888
5280	479.778	0.0512038	0.0179616	0.00458297	0.33	0.733067	0.229527	0.962594	2.21107	3.78973
5400	479.778	0.049536	0.0172761	-0.00469468	0.33	0.705857	0.220767	0.926624	-2.26497	1.94406
0	599.722	0.0575325	0.0187176	-0.000326097	0.33	0.840323	0.239188	1.07951	-0.157327	85.3506
120	599.722	0.0568627	0.0197505	0.0112868	0.33	0.827628	0.252388	1.08002	5.44537	36.7762
240	599.722	0.0573035	0.0190013	0.0103324	0.33	0.836049	0.242813	1.07886	4.98493	66.312
360	599.722	0.0576268	0.0200972	0.0114078	0.33	0.840492	0.256817	1.09731	5.50374	45.9155
480	599.722	0.0579853	0.0189421	0.00454763	0.33	0.847954	0.242057	1.09001	2.19402	95.1632
600	599.722	0.0576547	0.0196208	0.00771374	0.33	0.841484	0.250731	1.09221	3.72152	58.3998
720	599.722	0.0575343	0.0195233	0.00815162	0.33	0.839498	0.249484	1.08898	3.93278	57.6553
840	599.722	0.057819	0.0204873	0.00629547	0.33	0.843411	0.261803	1.10521	3.03727	42.1148
960	599.722	0.0573706	0.0199982	0.00789037	0.33	0.836156	0.255552	1.09171	3.80674	42.2971
1080	599.722	0.0584567	0.0198418	-0.00368193	0.33	0.855198	0.253554	1.10875	-1.77636	77.8034
1200	599.722	0.0582868	0.0214872	0.00483489	0.33	0.850465	0.274581	1.12505	2.33261	33.7913
1320	599.722	0.0581576	0.0206266	0.00352105	0.33	0.849145	0.263583	1.11273	1.69875	46.7636
1440	599.722	0.0590189	0.0213325	0.00668088	0.33	0.863388	0.272603	1.13599	3.22321	51.9726
1560	599.722	0.059243	0.0225129	0.00696975	0.33	0.866011	0.287687	1.1537	3.36258	34.8455
1680	599.722	0.0587448	0.0237025	0.00464359	0.33	0.856035	0.30289	1.15892	2.24032	16.459
1800	599.722	0.0587296	0.0216132	-0.000592843	0.33	0.858036	0.276191	1.13423	-0.286019	39.8584
1920	599.722	0.0591078	0.0218864	0.000714958	0.33	0.864336	0.279682	1.14402	0.344934	42.6265
2040	599.722	0.0594647	0.021887	0.0023925	0.33	0.870571	0.279689	1.15026	1.15427	50.6895
2160	599.722	0.0590104	0.0232619	0.00805679	0.33	0.861137	0.297259	1.1584	3.88703	22.6434
2280	599.722	0.0592485	0.0243341	0.00616403	0.33	0.864115	0.31096	1.17508	2.97386	16.4673
2400	599.722	0.0588505	0.0223778	0.00424677	0.33	0.859313	0.285961	1.14527	2.04887	30.3698
2520	599.722	0.0574006	0.0219174	0.00101137	0.33	0.834642	0.280077	1.11472	0.48794	17.6552
2640	599.722	0.0580873	0.0207224	-0.00344996	0.33	0.84782	0.264807	1.11263	-1.66445	43.2147
2760	599.722	0.0575971	0.0223948	0.00605023	0.33	0.837533	0.286179	1.12371	2.91896	15.8268
2880	599.722	0.0583073	0.0226445	0.00855449	0.33	0.849577	0.28937	1.13895	4.12715	20.5516
3000	599.722	0.0578319	0.0229801	0.00473414	0.33	0.840974	0.293658	1.13463	2.284	13.8734
3120	599.722	0.0577694	0.0218188	-0.000903434	0.33	0.84113	0.278817	1.11995	-0.435865	22.3756
3240	599.722	0.0578424	0.021063	0.000130488	0.33	0.843203	0.26916	1.11236	0.0629542	32.6897
3360	599.722	0.0573752	0.02202	-0.00279546	0.33	0.834094	0.281389	1.11548	-1.34868	16.6341
3480	599.722	0.0571487	0.0204869	0.00429317	0.33	0.831799	0.261798	1.0936	2.07126	29.9408
3600	599.722	0.0562443	0.0210219	0.00238493	0.33	0.81564	0.268634	1.08427	1.15062	14.3839
3720	599.722	0.0558547	0.0196025	-0.000793368	0.33	0.810411	0.250497	1.06091	-0.382763	23.3057
3840	599.722	0.0557121	0.0204957	0.00282079	0.33	0.807042	0.261911	1.06895	1.3609	13.8569
3960	599.722	0.0547842	0.0200945	0.00405099	0.33	0.79157	0.256784	1.04835	1.95441	10.0741
4080	599.722	0.055516	0.020656	0.00800078	0.33	0.803516	0.263959	1.06748	3.86	11.4941
4200	599.722	0.054904	0.0207	0.00571213	0.33	0.793004	0.264521	1.05752	2.75584	7.96259
4320	599.722	0.0556456	0.0201715	0.00539669	0.33	0.806235	0.257767	1.064	2.60366	15.6722
4440	599.722	0.0550424	0.0201514	0.00672549	0.33	0.795926	0.25751	1.05344	3.24474	11.327
4560	599.722	0.0547457	0.020465	0.00543609	0.33	0.790539	0.261519	1.05206	2.62266	8.17623
4680	599.722	0.0533373	0.0194973	0.00666837	0.33	0.767554	0.249151	1.01671	3.21718	5.92166
4800	599.722	0.0533684	0.0169963	-0.00371605	0.33	0.770546	0.217192	0.987739	-1.79282	24.3822
4920	599.722	0.0535302	0.0186808	0.00468239	0.33	0.771631	0.238718	1.01035	2.25904	10.3219
5040	599.722	0.0528081	0.0183455	0.00505203	0.33	0.759722	0.234433	0.994155	2.43737	8.13218
5160	599.722	0.0526645	0.0181853	-0.00140837	0.33	0.757448	0.232386	0.989835	-0.679472	8.17353
5280	599.722	0.0519658	0.0178651	0.00307912	0.33	0.745967	0.228295	0.974262	1.48553	6.44752
5400	599.722	0.0512945	0.0181508	0.00455183	0.33	0.734409	0.231945	0.966354	2.19605	3.58861
0	719.667	0.0581297	0.0194557	0.00486621	0.33	0.849917	0.24862	1.09854	2.34772	79.7151
120	719.667	0.0579342	0.0193518	0.00673953	0.33	0.846627	0.247292	1.09392	3.25151	76.2015
240	719.667	0.0576414	0.0191016	0.0103448	0.33	0.841805	0.244096	1.0859	4.99089	74.5537
360	719.667	0.0575157	0.0189673	0.00899786	0.33	0.839766	0.242379	1.08215	4.34105	74.8591
480	719.667	0.0572667	0.0179527	0.0041711	0.33	0.836519	0.229414	1.06593	2.01236	110.147
600	719.667	0.0573268	0.0186925	0.00661245	0.33	0.83678	0.238867	1.07565	3.1902	78.1531
720	719.667	0.0571554	0.0186574	0.00570291	0.33	0.833845	0.238419	1.07226	2.75139	73.0945
840	719.667	0.0573524	0.0189621	0.00429326	0.33	0.836939	0.242313	1.07925	2.0713	69.2584
960	719.667	0.0576795	0.0189717	-0.000923723	0.33	0.842605	0.242435	1.08504	-0.445654	80.9186
1080	719.667	0.0578544	0.018151	-9.13739e-05	0.33	0.846523	0.231948	1.07847	-0.0440837	131.941
1200	719.667	0.0576556	0.0187903	0.00166008	0.33	0.842383	0.240117	1.0825	0.800911	87.4193
1320	719.667	0.0578943	0.0200281	0.000863433	0.33	0.84521	0.255935	1.10114	0.416566	54.1963
1440	719.667	0.0576677	0.0213833	0.00499997	0.33	0.839832	0.273252	1.11308	2.41225	25.8366
1560	719.667	0.0585549	0.0206405	0.000256121	0.33	0.856046	0.263761	1.11981	0.123567	56.4985
1680	719.667	0.0590253	0.021288	0.00441741	0.33	0.863547	0.272035	1.13558	2.13119	53.1638
1800	719.667	0.0583179	0.0217514	0.00921351	0.33	0.850722	0.277957	1.12868	4.44509	30.5245
1920	719.667	0.0592947	0.0232417	0.0164574	0.33	0.866116	0.297	1.16312	7.93993	26.3444
2040	719.667	0.0584536	0.0260165	0.0127252	0.33	0.848478	0.332459	1.18094	6.13932	5.54331
2160	719.667	0.0579806	0.0252429	0.0125443	0.33	0.841126	0.322574	1.1637	6.05204	5.83076
2280	719.667	0.0593659	0.0241359	0.00951599	0.33	0.866378	0.308428	1.17481	4.59103	18.9369
2400	719.667	0.0583001	0.0240187	0.0130808	0.33	0.847971	0.306931	1.1549	6.31086	11.4421
2520	719.667	0.0570247	0.0219676	0.0102798	0.33	0.828094	0.280719	1.10881	4.95952	14.1319
2640	719.667	0.0584806	0.0227759	0.00882763	0.33	0.852445	0.291048	1.14349	4.25892	21.2313
2760	719.667	0.0578914	0.0233559	0.00846332	0.33	0.841602	0.29846	1.14006	4.08316	12.1825
2880	719.667	0.0569543	0.0209343	0.00315252	0.33	0.827967	0.267515	1.09548	1.52094	21.9182
3000	719.667	0.0575492	0.0229792	0.0131848	0.33	0.836083	0.293647	1.12973	6.36105	11.9408
3120	719.667	0.0569358	0.0234895	0.0153013	0.33	0.824961	0.300167	1.12513	7.38217	6.84709
3240	719.667	0.0572949	0.0218046	-0.00366873	0.33	0.832933	0.278636	1.11157	-1.76999	17.5689
3360	719.667	0.0561122	0.0228377	0.0102265	0.33	0.811489	0.291838	1.10333	4.93381	5.76218
3480	719.667	0.0567321	0.0226123	0.0128829	0.33	0.822374	0.288958	1.11133	6.21539	9.01425
3600	719.667	0.0562659	0.0212417	0.00307268	0.33	0.815784	0.271443	1.08723	1.48243	13.1154
3720	719.667	0.0559301	0.0211376	0.00671661	0.33	0.810123	0.270113	1.08024	3.24045	11.4596
3840	719.667	0.0555935	0.0214694	0.0134673	0.33	0.80401	0.274353	1.07836	6.49735	8.10676
3960	719.667	0.0558918	0.0208	0.00907537	0.33	0.809814	0.265798	1.07561	4.37845	13.194
4080	719.667	0.0555978	0.0205591	0.00754638	0.33	0.805017	0.262721	1.06774	3.64078	12.6121
4200	719.667	0.0549121	0.0212098	0.00841314	0.33	0.792624	0.271036	1.06366	4.05895	6.2254
4320	719.667	0.0548668	0.0208793	0.014053	0.33	0.792185	0.266812	1.059	6.77995	7.13286
4440	719.667	0.0541987	0.0207246	0.0128637	0.33	0.780958	0.264835	1.04579	6.20614	5.22047
4560	719.667	0.0540593	0.0209772	0.0114219	0.33	0.778337	0.268063	1.0464	5.51052	4.23302
4680	719.667	0.0539565	0.0197394	0.0041524	0.33	0.777823	0.252245	1.03007	2.00334	7.50909
4800	719.667	0.0532289	0.0201603	0.0127622	0.33	0.765065	0.257624	1.02269	6.15717	3.90317
4920	719.667	0.0525567	0.0193794	0.0123364	0.33	0.754468	0.247645	1.00211	5.95176	3.931
5040	719.667	0.0524972	0.0190161	0.0135062	0.33	0.753817	0.243003	0.99682	6.51613	4.63046
5160	719.667	0.0521752	0.0178323	0.0118394	0.33	0.749528	0.227875	0.977403	5.71196	7.46513
5280	719.667	0.0518317	0.0191082	0.0148077	0.33	0.742519	0.24418	0.986699	7.14403	2.90612
5400	719.667	0.0512357	0.0188573	0.0117443	0.33	0.732755	0.240974	0.973729	5.66609	2.29033
0	839.611	0.0587382	0.021115	0.0141723	0.33	0.858728	0.269823	1.12855	6.83749	49.9117
120	839.611	0.0582537	0.0207663	0.0158381	0.33	0.850666	0.265368	1.11603	7.64115	46.0095
240	839.611	0.0581137	0.0211706	0.0186942	0.33	0.847799	0.270534	1.11833	9.01911	35.7082
360	839.611	0.0572363	0.0198262	0.0178862	0.33	0.834011	0.253355	1.08737	8.62929	42.9065
480	839.611	0.0570584	0.0200498	0.016444	0.33	0.830698	0.256212	1.08691	7.93348	35.1938
600	839.611	0.0571192	0.019648	0.0149239	0.33	0.832173	0.251077	1.08325	7.20009	44.0699
720	839.611	0.0568551	0.0199705	0.00874463	0.33	0.827267	0.255199	1.08247	4.21888	32.9263
840	839.611	0.0564867	0.0195363	0.017341	0.33	0.821362	0.24965	1.07101	8.36623	33.6321
960	839.611	0.0566871	0.0197994	0.0103492	0.33	0.824546	0.253012	1.07756	4.99303	32.7976
1080	839.611	0.0570209	0.0203752	0.0182917	0.33	0.829706	0.26037	1.09008	8.82489	29.5481
1200	839.611	0.0573001	0.020581	0.0131961	0.33	0.834317	0.263	1.09732	6.36653	30.9682
1320	839.611	0.0575875	0.021314	0.0153839	0.33	0.838517	0.272367	1.11088	7.42201	25.5837
1440	839.611	0.0577683	0.0208712	0.0141345	0.33	0.842122	0.266708	1.10883	6.81926	34.3756
1560	839.611	0.058018	0.0214288	0.0092324	0.33	0.84586	0.273834	1.11969	4.45421	30.2803
1680	839.611	0.0584893	0.0216107	0.012907	0.33	0.853856	0.276159	1.13001	6.22703	35.4081
1800	839.611	0.0584473	0.0223959	0.0124214	0.33	0.852277	0.286193	1.13847	5.99274	24.5837
1920	839.611	0.0579029	0.0233249	0.00511106	0.33	0.841833	0.298064	1.1399	2.46585	12.4202
2040	839.611	0.0528241	0.0220938	0.00935501	0.33	0.756336	0.282332	1.03867	4.51336	1.12708
2160	839.611	0.0529141	0.0266991	0.0100417	0.33	0.753353	0.341182	1.09454	4.84466	0.140029
2280	839.611	0.0577778	0.0244236	0.0110744	0.33	0.838497	0.312104	1.1506	5.34291	7.30686
2400	839.611	0.0575476	0.0251052	0.00633729	0.33	0.833797	0.320814	1.15461	3.05745	4.85747
2520	839.611	0.0592102	0.0231452	0.00526534	0.33	0.864747	0.295767	1.16051	2.54028	26.2866
2640	839.611	0.0593371	0.0237631	0.0121548	0.33	0.866286	0.303663	1.16995	5.86413	21.7155
2760	839.611	0.0586906	0.0238043	0.0118599	0.33	0.854983	0.30419	1.15917	5.72183	15.3436
2880	839.611	0.0579099	0.0230154	0.0108756	0.33	0.842287	0.294109	1.1364	5.24698	14.238
3000	839.611	0.0583637	0.0222665	0.0108532	0.33	0.850963	0.284539	1.1355	5.23616	24.9201
3120	839.611	0.0578895	0.0229024	0.0129702	0.33	0.842054	0.292665	1.13472	6.25751	14.7898
3240	839.611	0.0570062	0.021358	0.0030424	0.33	0.828417	0.272929	1.10135	1.46782	18.4973
3360	839.611	0.0583938	0.0179435	0.00331858	0.33	0.856149	0.229296	1.08545	1.60106	187.97
3480	839.611	0.0571398	0.0200237	0.00350119	0.33	0.832133	0.255878	1.08801	1.68916	37.1544
3600	839.611	0.0562167	0.0192172	-0.00268546	0.33	0.81704	0.245572	1.06261	-1.29561	34.2565
3720	839.611	0.0559766	0.0188719	0.00290288	0.33	0.813262	0.24116	1.05442	1.40051	35.9975
3840	839.611	0.0566332	0.0178879	-0.00578606	0.33	0.825613	0.228586	1.0542	-2.79151	83.5496
3960	839.611	0.0559958	0.0174617	0.00366938	0.33	0.815052	0.223139	1.03819	1.77031	76.0807
4080	839.611	0.0554003	0.0189011	0.00426742	0.33	0.80333	0.241534	1.04486	2.05883	26.116
4200	839.611	0.0547633	0.018187	0.00157301	0.33	0.793142	0.232408	1.02555	0.758905	27.0074
4320	839.611	0.0553342	0.0187198	0.00330851	0.33	0.802381	0.239217	1.0416	1.5962	27.7004
4440	839.611	0.0550551	0.0192626	0.00184753	0.33	0.797045	0.246152	1.0432	0.89135	17.9472
4560	839.611	0.0544447	0.0177502	0.00513033	0.33	0.788136	0.226826	1.01496	2.47515	28.8257
4680	839.611	0.0542918	0.017657	-0.00102826	0.33	0.785619	0.225636	1.01125	-0.496086	27.9211
4800	839.611	0.0533988	0.0169244	0.00296941	0.33	0.771133	0.216274	0.987407	1.43261	25.8634
4920	839.611	0.0534912	0.0170305	0.00287941	0.33	0.772599	0.217629	0.990228	1.38918	25.6022
5040	839.611	0.053025	0.0164724	-0.00423902	0.33	0.765227	0.210497	0.975724	-2.04513	27.4096
5160	839.611	0.0530015	0.0151875	0.000672549	0.33	0.766087	0.194078	0.960165	0.324474	59.6197
5280	839.611	0.0522662	0.0155543	0.00201186	0.33	0.753262	0.198765	0.952027	0.970632	31.4564
5400	839.611	0.0522037	0.0165117	0.00223428	0.33	0.751282	0.210999	0.962281	1.07794	16.7155
0	959.556	0.0600135	0.0203694	0.00396484	0.33	0.881867	0.260296	1.14216	1.91285	126.824
120	959.556	0.0589019	0.0201859	0.00704887	0.33	0.862593	0.257952	1.12054	3.40076	82.1263
240	959.556	0.0594487	0.0194392	0.00622779	0.33	0.872979	0.248409	1.12139	3.00462	149.117
360	959.556	0.0593427	0.0190813	0.00218824	0.33	0.871513	0.243836	1.11535	1.05572	167.714
480	959.556	0.0587233	0.0187654	0.00277409	0.33	0.861016	0.2398	1.10082	1.33837	146.651
600	959.556	0.05837	0.0181468	0.00947216	0.33	0.855514	0.231894	1.08741	4.56988	168.183
720	959.556	0.0576567	0.0182039	0.0060735	0.33	0.843027	0.232624	1.07565	2.93019	116.984
840	959.556	0.057696	0.0180723	0.000451267	0.33	0.84385	0.230942	1.07479	0.217715	127.322
960	959.556	0.0576485	0.0181437	0.00841269	0.33	0.842949	0.231855	1.0748	4.05873	120.1
1080	959.556	0.0579447	0.0177296	0.0043501	0.33	0.848545	0.226563	1.07511	2.09872	170.022
1200	959.556	0.0574075	0.0180794	0.00845665	0.33	0.838829	0.231033	1.06986	4.07994	110.53
1320	959.556	0.0579492	0.0186521	0.00434291	0.33	0.847636	0.238352	1.08599	2.09526	107.731
1440	959.556	0.0576071	0.0181093	0.00530687	0.33	0.842266	0.231415	1.07368	2.56032	119.805
1560	959.556	0.0584587	0.0200967	0.00670436	0.33	0.854958	0.256811	1.11177	3.23454	69.1867
1680	959.556	0.058131	0.0190077	0.00337163	0.33	0.850421	0.242896	1.09332	1.62665	98.8494
1800	959.556	0.0584551	0.0188469	0.00389028	0.33	0.856243	0.240841	1.09708	1.87688	124.492
1920	959.556	0.0588293	0.0210171	0.00581127	0.33	0.860422	0.268573	1.129	2.80367	54.5056
2040	959.556	0.0592466	0.0216718	0.0051756	0.33	0.866994	0.27694	1.14393	2.49699	50.0487
2160	959.556	0.0589898	0.0218352	-0.00471293	0.33	0.862333	0.279027	1.14136	-2.27377	41.1312
2280	959.556	0.0583898	0.0202915	-6.39595e-05	0.33	0.853547	0.259301	1.11285	-0.0308575	61.1532
2400	959.556	0.0582562	0.0216136	-0.00296474	0.33	0.849798	0.276196	1.12599	-1.43035	31.4526
2520	959.556	0.0591275	0.0211875	0.0052361	0.33	0.865443	0.270751	1.13619	2.52618	58.3894
2640	959.556	0.0560872	0.0215941	0.00362188	0.33	0.812347	0.275947	1.08829	1.74739	10.0717
2760	959.556	0.0585738	0.0220357	-0.0070703	0.33	0.854867	0.28159	1.13646	-3.41109	30.6501
2880	959.556	0.0585769	0.0208915	0.0045232	0.33	0.856157	0.266968	1.12313	2.18224	50.9776
3000	959.556	0.0564899	0.0210389	-0.000811264	0.33	0.819849	0.268852	1.0887	-0.391397	16.2956
3120	959.556	0.056299	0.0234576	0.00537072	0.33	0.81405	0.299759	1.11381	2.59112	4.85655
3240	959.556	0.0537957	0.021578	0.00595069	0.33	0.773265	0.27574	1.04901	2.87093	2.6762
3360	959.556	0.056123	0.0233471	0.00377202	0.33	0.811145	0.298348	1.10949	1.81983	4.61321
3480	959.556	0.0574818	0.0208358	0.00282383	0.33	0.837194	0.266257	1.10345	1.36237	30.1884
3600	959.556	0.056855	0.0200247	0.0053795	0.33	0.827209	0.255892	1.0831	2.59536	32.0732
3720	959.556	0.056777	0.0192366	0.0027402	0.33	0.826687	0.245821	1.07251	1.32202	45.3043
3840	959.556	0.056754	0.0193101	0.00416955	0.33	0.826212	0.246759	1.07297	2.01162	43.1757
3960	959.556	0.0565381	0.0191249	0.00685356	0.33	0.822678	0.244394	1.06707	3.30652	42.3815
4080	959.556	0.0554306	0.0197641	0.00742993	0.33	0.802967	0.252561	1.05553	3.5846	17.0758
4200	959.556	0.055463	0.0184477	0.00825279	0.33	0.80487	0.235739	1.04061	3.98159	34.2216
4320	959.556	0.0550272	0.0184782	0.00658554	0.33	0.797364	0.23613	1.03349	3.17722	26.6625
4440	959.556	0.0556056	0.0189111	-0.00354664	0.33	0.806843	0.24166	1.0485	-1.71109	29.0004
4560	959.556	0.0557468	0.0192434	0.00762086	0.33	0.808927	0.245907	1.05483	3.67671	26.3739
4680	959.556	0.0535343	0.0170902	-0.00742614	0.33	0.773274	0.218392	0.991666	-3.58277	25.3341
4800	959.556	0.0531166	0.0166429	0.00279653	0.33	0.766616	0.212676	0.979291	1.3492	26.0645
4920	959.556	0.0523835	0.0164593	0.00404939	0.33	0.754372	0.21033	0.964702	1.95364	19.1617
5040	959.556	0.0512354	0.0157674	0.000590429	0.33	0.735673	0.201488	0.937161	0.284855	15.0518
5160	959.556	0.0512466	0.0159291	0.00524142	0.33	0.735709	0.203555	0.939264	2.52874	13.6548
5280	959.556	0.0518208	0.0163073	0.00417963	0.33	0.745017	0.208388	0.953404	2.01648	15.1411
5400	959.556	0.0514157	0.0165147	0.0029207	0.33	0.737997	0.211037	0.949034	1.4091	10.4385
0	1079.5	0.0603189	0.0227909	-0.0021761	0.33	0.88454	0.29124	1.17578	-1.04987	52.2343
120	1079.5	0.0598472	0.0205132	-0.00239712	0.33	0.878787	0.262133	1.14092	-1.1565	110.314
240	1079.5	0.0597765	0.0192497	-0.0122594	0.33	0.878941	0.245988	1.12493	-5.91457	188.574
360	1079.5	0.0595485	0.020082	-0.0026784	0.33	0.874022	0.256623	1.13065	-1.2922	116.514
480	1079.5	0.0592935	0.0200453	0.00369535	0.33	0.869596	0.256155	1.12575	1.78284	105.265
600	1079.5	0.0590026	0.0190943	-0.00468184	0.33	0.865541	0.244002	1.10954	-2.25877	142.719
720	1079.5	0.0581997	0.0181979	-0.0064121	0.33	0.852487	0.232547	1.08503	-3.09354	151.554
840	1079.5	0.0573548	0.0179068	0.00359155	0.33	0.838096	0.228827	1.06692	1.73276	117.635
960	1079.5	0.0574409	0.0177691	0.00054884	0.33	0.839739	0.227067	1.06681	0.26479	131.498
1080	1079.5	0.0577661	0.0174042	-0.00316796	0.33	0.845783	0.222405	1.06819	-1.52839	184.619
1200	1079.5	0.0568735	0.018075	-0.00165609	0.33	0.829575	0.230976	1.06055	-0.798984	85.4237
1320	1079.5	0.0575905	0.0169322	0.0032852	0.33	0.843229	0.216374	1.0596	1.58496	217.256
1440	1079.5	0.0570813	0.0176952	-0.00347838	0.33	0.833576	0.226123	1.0597	-1.67816	114.954
1560	1079.5	0.0572271	0.0179566	0.0045432	0.33	0.835827	0.229464	1.06529	2.19188	107.845
1680	1079.5	0.0565367	0.0181387	0.00474024	0.33	0.823684	0.23179	1.05547	2.28695	69.93
1800	1079.5	0.0572364	0.019076	0.00494567	0.33	0.834807	0.243768	1.07857	2.38606	61.8215
1920	1079.5	0.0580221	0.017797	-0.00191444	0.33	0.849822	0.227424	1.07725	-0.92363	170.365
2040	1079.5	0.0571367	0.0189142	-0.00137238	0.33	0.833251	0.2417	1.07495	-0.662111	63.7274
2160	1079.5	0.0580519	0.0192633	0.00595146	0.33	0.84877	0.246162	1.09493	2.87131	84.1643
2280	1079.5	0.0579303	0.0211746	0.00330244	0.33	0.844609	0.270585	1.11519	1.59327	32.4885
2400	1079.5	0.0566448	0.0196275	0.00385714	0.33	0.823994	0.250815	1.07481	1.86089	34.9029
2520	1079.5	0.0582406	0.0192905	-0.003108	0.33	0.852025	0.246509	1.09853	-1.49946	90.9587
2640	1079.5	0.0580441	0.0197098	0.000823181	0.33	0.848154	0.251867	1.10002	0.397147	67.7874
2760	1079.5	0.0574389	0.0199561	-0.000965603	0.33	0.837384	0.255015	1.0924	-0.465859	44.6673
2880	1079.5	0.0576066	0.0214651	0.00156067	0.33	0.838687	0.274298	1.11299	0.752949	24.121
3000	1079.5	0.058396	0.0207097	0.00147692	0.33	0.853204	0.264645	1.11785	0.712544	50.6481
3120	1079.5	0.0548486	0.0214604	6.83665e-05	0.33	0.791286	0.274238	1.06552	0.0329837	5.31164
3240	1079.5	0.0419191	0.0188106	0.000612736	0.33	0.580828	0.240377	0.821205	0.295617	0.00142544
3360	1079.5	0.0444973	0.0263194	-0.00379309	0.33	0.61588	0.336331	0.95221	-1.82999	0.000174284
3480	1079.5	0.0564454	0.0193488	-0.00426191	0.33	0.820845	0.247254	1.0681	-2.05618	36.1279
3600	1079.5	0.0566011	0.0188837	-0.00127098	0.33	0.824018	0.241311	1.06533	-0.613189	49.4059
3720	1079.5	0.055976	0.0196632	0.00237641	0.33	0.812435	0.251271	1.06371	1.14651	24.1256
3840	1079.5	0.0554771	0.0193966	0.00371651	0.33	0.80414	0.247865	1.052	1.79305	21.0998
3960	1079.5	0.0547725	0.0179364	-0.00279068	0.33	0.793554	0.229206	1.02276	-1.34638	31.0928
4080	1079.5	0.0532213	0.0186529	0.00400578	0.33	0.766418	0.238362	1.00478	1.9326	8.7486
4200	1079.5	0.0541172	0.0182873	0.00442454	0.33	0.782008	0.23369	1.0157	2.13464	17.9006
4320	1079.5	0.0534399	0.0165846	0.0021327	0.33	0.772167	0.211931	0.984098	1.02893	32.3128
4440	1079.5	0.0542194	0.0173407	-0.00386034	0.33	0.784699	0.221593	1.00629	-1.86244	32.0391
4560	1079.5	0.0542419	0.0177835	0.00603588	0.33	0.78464	0.227251	1.01189	2.91203	25.3225
4680	1079.5	0.0537403	0.018035	0.00584891	0.33	0.775842	0.230466	1.00631	2.82183	16.6358
4800	1079.5	0.0532834	0.0164698	0.00486991	0.33	0.769619	0.210465	0.980083	2.34951	31.7155
4920	1079.5	0.0524178	0.0157881	-0.00126007	0.33	0.755601	0.201753	0.957354	-0.607926	29.5871
5040	1079.5	0.052585	0.0153402	-0.00205392	0.33	0.758868	0.196029	0.954897	-0.99092	43.0845
5160	1079.5	0.0517839	0.0164369	0.000593633	0.33	0.744269	0.210044	0.954313	0.2864	13.6658
5280	1079.5	0.0518431	0.0165562	0.000383496	0.33	0.745153	0.211568	0.956721	0.185019	13.1488
5400	1079.5	0.0509125	0.0150795	-0.00159299	0.33	0.730895	0.192698	0.923593	-0.768546	19.5105
0	1199.44	0.055993	0.0207733	-0.0105987	0.33	0.811579	0.265458	1.07704	-5.11339	14.1269
120	1199.44	0.0602765	0.0210082	0.00290476	0.33	0.88578	0.26846	1.15424	1.40141	108.233
240	1199.44	0.0600998	0.0206191	-0.0035895	0.33	0.883107	0.263487	1.14659	-1.73177	118.209
360	1199.44	0.0607304	0.0213375	-0.00243899	0.33	0.893403	0.272667	1.16607	-1.1767	115.594
480	1199.44	0.0603643	0.0212643	0.000970565	0.33	0.887039	0.271731	1.15877	0.468253	100.963
600	1199.44	0.0585415	0.0221116	0.00262369	0.33	0.854222	0.282559	1.13678	1.26581	29.1743
720	1199.44	0.0589642	0.0220317	0.00344557	0.33	0.861672	0.281539	1.14321	1.66233	37.3
840	1199.44	0.0575196	0.019814	0.00392005	0.33	0.838934	0.253199	1.09213	1.89124	49.7815
960	1199.44	0.0576207	0.0196691	-0.00690909	0.33	0.840841	0.251348	1.09219	-3.33332	56.1099
1080	1199.44	0.0566998	0.0199186	0.00122362	0.33	0.824639	0.254536	1.07918	0.590342	31.15
1200	1199.44	0.0568883	0.0196364	0.00268009	0.33	0.828191	0.25093	1.07912	1.29302	39.3957
1320	1199.44	0.0579199	0.0193338	0.00385798	0.33	0.846398	0.247063	1.09346	1.8613	76.328
1440	1199.44	0.057526	0.0210272	0.0062727	0.33	0.837756	0.268701	1.10646	3.02629	28.2676
1560	1199.44	0.0577517	0.020402	0.00690126	0.33	0.842335	0.260713	1.10305	3.32954	42.3671
1680	1199.44	0.0576181	0.0203888	-0.000692695	0.33	0.840032	0.260545	1.10058	-0.334194	39.8539
1800	1199.44	0.0570939	0.0208987	0.00228056	0.33	0.830416	0.26706	1.09748	1.10027	23.9791
1920	1199.44	0.0571605	0.0216128	0.00260668	0.33	0.830814	0.276185	1.107	1.2576	17.8556
2040	1199.44	0.0581516	0.0207527	-0.00043568	0.33	0.848905	0.265194	1.1141	-0.210196	44.0063
2160	1199.44	0.0568481	0.0207693	0.00169355	0.33	0.826308	0.265406	1.09171	0.817058	22.3986
2280	1199.44	0.0569944	0.020488	0.00500959	0.33	0.82913	0.261812	1.09094	2.4169	27.6241
2400	1199.44	0.0564439	0.0203135	0.00272858	0.33	0.819813	0.259582	1.0794	1.31641	22.4861
2520	1199.44	0.0567735	0.020131	0.00145769	0.33	0.825689	0.25725	1.08294	0.703269	29.206
2640	1199.44	0.0574136	0.021492	0.00359549	0.33	0.835317	0.274641	1.10996	1.73466	21.5524
2760	1199.44	0.0573552	0.0217169	0.003942	0.33	0.834068	0.277516	1.11158	1.90183	18.8709
2880	1199.44	0.0564142	0.0198686	-0.0050635	0.33	0.819765	0.253896	1.07366	-2.44291	27.4904
3000	1199.44	0.0574374	0.0221921	-0.00767381	0.33	0.834986	0.283588	1.11857	-3.70226	15.9159
3120	1199.44	0.0553084	0.0258898	0.00134802	0.33	0.794616	0.33084	1.12546	0.650357	0.943371
3240	1199.44	0.0441476	0.0278824	0.00154096	0.33	0.609026	0.356303	0.965329	0.743441	5.49797e-05
3360	1199.44	0.0401013	0.0286542	0.000598252	0.33	0.544856	0.366165	0.911022	0.288629	4.61573e-07
3480	1199.44	0.0522319	0.0219966	-3.36617e-05	0.33	0.746468	0.281091	1.02756	-0.0162402	0.805488
3600	1199.44	0.0557032	0.0209893	0.00272779	0.33	0.806382	0.268218	1.0746	1.31603	10.8498
3720	1199.44	0.0551621	0.0196806	-0.00174642	0.33	0.798452	0.251494	1.04995	-0.842565	15.3652
3840	1199.44	0.0535168	0.0200923	0.00579363	0.33	0.770009	0.256755	1.02676	2.79516	4.81304
3960	1199.44	0.0543704	0.0190302	0.00438909	0.33	0.785582	0.243183	1.02876	2.11753	13.8371
4080	1199.44	0.0527176	0.0177768	0.0038348	0.33	0.758745	0.227166	0.985911	1.85011	10.66
4200	1199.44	0.0536388	0.0185878	0.0023804	0.33	0.773568	0.23753	1.0111	1.14843	11.5663
4320	1199.44	0.0529196	0.0179954	0.000487238	0.33	0.761951	0.22996	0.99191	0.23507	10.5925
4440	1199.44	0.0530051	0.0190819	0.00213155	0.33	0.762335	0.243844	1.00618	1.02838	6.07675
4560	1199.44	0.0527092	0.0181813	0.00520368	0.33	0.758208	0.232335	0.990543	2.51053	8.41366
4680	1199.44	0.0527487	0.0179457	0.000828743	0.33	0.759106	0.229324	0.988431	0.39983	9.85315
4800	1199.44	0.0520761	0.0171839	-0.00201586	0.33	0.74848	0.219589	0.968069	-0.972559	10.3177
4920	1199.44	0.0507351	0.0169995	0.000234812	0.33	0.726119	0.217233	0.943352	0.113286	5.0599
5040	1199.44	0.0511559	0.0177069	0.00182074	0.33	0.732505	0.226273	0.958778	0.878424	4.28143
5160	1199.44	0.0508516	0.0167627	-0.000720143	0.33	0.728292	0.214207	0.942498	-0.347436	6.31411
5280	1199.44	0.050153	0.0176339	0.000653788	0.33	0.7158	0.22534	0.94114	0.315423	2.34297
5400	1199.44	0.050413	0.0171045	0.00157794	0.33	0.720633	0.218575	0.939207	0.761285	3.85796
0	1319.39	0.0469572	0.02627	-0.00855447	0.33	0.655507	0.335699	0.991206	-4.12714	0.00169396
120	1319.39	0.0567525	0.0231761	-0.0110503	0.33	0.822136	0.296162	1.1183	-5.33128	7.0957
240	1319.39	0.0586805	0.0223436	0.00463136	0.33	0.856389	0.285524	1.14191	2.23441	28.2975
360	1319.39	0.0593679	0.0209516	0.00137359	0.33	0.869904	0.267736	1.13764	0.662693	72.6796
480	1319.39	0.0588815	0.0226119	0.00219774	0.33	0.859599	0.288953	1.14855	1.06031	27.907
600	1319.39	0.059239	0.0218249	0.00178106	0.33	0.866695	0.278895	1.14559	0.85928	46.6705
720	1319.39	0.0587289	0.0204977	0.00704384	0.33	0.859234	0.261936	1.12117	3.39833	65.5936
840	1319.39	0.0583634	0.0208691	0.00286503	0.33	0.852463	0.266681	1.11914	1.38225	46.359
960	1319.39	0.0577101	0.0205025	0.00547212	0.33	0.841506	0.261997	1.1035	2.64005	39.5892
1080	1319.39	0.0572518	0.0199886	-0.000150114	0.33	0.834109	0.25543	1.08954	-0.0724232	40.0068
1200	1319.39	0.0567644	0.0194517	0.00174347	0.33	0.826244	0.24857	1.07481	0.841142	40.4752
1320	1319.39	0.0568898	0.020921	0.0076707	0.33	0.826867	0.267345	1.09421	3.70076	21.3177
1440	1319.39	0.0575955	0.0203622	0.00585446	0.33	0.839667	0.260204	1.09987	2.82451	39.8949
1560	1319.39	0.0570372	0.0198214	0.000729591	0.33	0.830572	0.253294	1.08387	0.351994	38.8618
1680	1319.39	0.0580667	0.0208893	-0.00231421	0.33	0.847284	0.26694	1.11422	-1.1165	39.6273
1800	1319.39	0.0577728	0.0217823	-0.00194246	0.33	0.841228	0.278352	1.11958	-0.937145	22.7837
1920	1319.39	0.0581424	0.0221945	-0.00310914	0.33	0.847197	0.283619	1.13082	-1.50002	22.9633
2040	1319.39	0.0578567	0.0216768	-0.00409256	0.33	0.842795	0.277003	1.1198	-1.97447	24.9443
2160	1319.39	0.058462	0.0205636	0.00382639	0.33	0.85451	0.262777	1.11729	1.84606	55.9156
2280	1319.39	0.0583737	0.0193931	0.00422233	0.33	0.854234	0.247821	1.10205	2.03708	92.3188
2400	1319.39	0.0578848	0.0202035	0.00444403	0.33	0.844857	0.258176	1.10303	2.14404	49.6823
2520	1319.39	0.0582403	0.0207682	0.00503217	0.33	0.85043	0.265392	1.11582	2.42779	45.6639
2640	1319.39	0.0578641	0.0211755	-0.00143187	0.33	0.843459	0.270597	1.11406	-0.69081	31.4002
2760	1319.39	0.0569612	0.0219441	0.00363848	0.33	0.827024	0.28042	1.10744	1.7554	13.8045
2880	1319.39	0.0584965	0.0208637	0.0013645	0.33	0.854787	0.266613	1.1214	0.658308	49.6247
3000	1319.39	0.0583108	0.0203483	0.00179635	0.33	0.85211	0.260027	1.11214	0.866656	57.3173
3120	1319.39	0.0582971	0.0224238	0.00241996	0.33	0.849636	0.286549	1.13619	1.16752	22.4933
3240	1319.39	0.0563559	0.0189221	0.00366789	0.33	0.819746	0.241801	1.06155	1.76959	42.7357
3360	1319.39	0.0567239	0.0237822	0.00300732	0.33	0.821009	0.303908	1.12492	1.45089	5.35707
3480	1319.39	0.0575178	0.0219508	-0.00216217	0.33	0.836633	0.280504	1.11714	-1.04315	18.4979
3600	1319.39	0.0568254	0.0194414	-0.00725146	0.33	0.827309	0.248438	1.07575	-3.49849	41.9726
3720	1319.39	0.0569898	0.0194841	0.0044291	0.33	0.830107	0.248983	1.07909	2.13684	44.6969
3840	1319.39	0.0558479	0.0193017	0.0062134	0.33	0.810605	0.246652	1.05726	2.99768	27.0233
3960	1319.39	0.0549704	0.0175369	0.00323728	0.33	0.797348	0.2241	1.02145	1.56184	43.0005
4080	1319.39	0.0540453	0.0168287	3.65675e-05	0.33	0.782239	0.21505	0.997289	0.0176421	39.0291
4200	1319.39	0.053212	0.0174696	0.00736699	0.33	0.767422	0.223241	0.990663	3.55423	16.959
4320	1319.39	0.0534952	0.0177627	0.00910664	0.33	0.771945	0.226986	0.99893	4.39353	16.8647
4440	1319.39	0.0523336	0.0160988	0.0052537	0.33	0.753876	0.205724	0.9596	2.53467	23.2395
4560	1319.39	0.0532792	0.0167133	0.0075672	0.33	0.769308	0.213576	0.982884	3.65082	27.3847
4680	1319.39	0.0531443	0.0158759	0.00344667	0.33	0.767838	0.202874	0.970712	1.66286	42.0376
4800	1319.39	0.0523156	0.0160046	0.00560173	0.33	0.753664	0.20452	0.958183	2.70258	24.3866
4920	1319.39	0.0521328	0.0157151	0.00587755	0.33	0.750852	0.20082	0.951672	2.83565	26.3318
5040	1319.39	0.0521781	0.0162687	0.00589573	0.33	0.751084	0.207895	0.958978	2.84442	19.1223
5160	1319.39	0.0513082	0.0153566	-0.00561333	0.33	0.737287	0.196239	0.933526	-2.70817	20.5327
5280	1319.39	0.0522896	0.0170186	0.00514296	0.33	0.752244	0.217478	0.969721	2.48124	12.9321
5400	1319.39	0.0519205	0.0163217	0.00353178	0.33	0.746683	0.208571	0.955254	1.70392	15.9157
0	1439.33	0.0555916	0.02211	0.00594431	0.33	0.80332	0.282538	1.08586	2.86786	5.98591
120	1439.33	0.059925	0.0205119	0.00871892	0.33	0.880154	0.262117	1.14227	4.20647	114.388
240	1439.33	0.0591268	0.0191902	0.00735164	0.33	0.867612	0.245228	1.11284	3.54683	144.463
360	1439.33	0.0589485	0.0199599	0.00633278	0.33	0.863654	0.255063	1.11872	3.05528	93.1085
480	1439.33	0.0590506	0.0197672	0.00458309	0.33	0.865648	0.2526	1.11825	2.21113	106.722
600	1439.33	0.0580179	0.0203076	0.00608304	0.33	0.847058	0.259506	1.10656	2.93479	50.56
720	1439.33	0.0581939	0.019756	0.00260907	0.33	0.850712	0.252458	1.10317	1.25876	71.3411
840	1439.33	0.05754	0.0179492	7.27177e-06	0.33	0.84127	0.229369	1.07064	0.00350829	125.794
960	1439.33	0.0576894	0.0186979	0.00335434	0.33	0.843069	0.238936	1.082	1.61831	92.9939
1080	1439.33	0.0573944	0.0183222	0.00599176	0.33	0.838344	0.234136	1.07248	2.89075	97.1847
1200	1439.33	0.057428	0.0175636	-0.00440288	0.33	0.839732	0.224442	1.06417	-2.12418	145.191
1320	1439.33	0.057541	0.0185779	0.00394368	0.33	0.840619	0.237403	1.07802	1.90264	91.8381
1440	1439.33	0.0576797	0.0186763	0.00217468	0.33	0.842924	0.23866	1.08158	1.04918	93.549
1560	1439.33	0.0585222	0.0195259	0.00433087	0.33	0.85668	0.249517	1.1062	2.08945	93.0678
1680	1439.33	0.0593888	0.0201011	0.000489533	0.33	0.871203	0.256868	1.12807	0.236177	107.289
1800	1439.33	0.0599757	0.021453	0.00299126	0.33	0.880003	0.274143	1.15415	1.44314	77.8181
1920	1439.33	0.0586475	0.020989	0.00267793	0.33	0.857283	0.268214	1.1255	1.29198	50.5109
2040	1439.33	0.0580073	0.0217539	0.00471482	0.33	0.845325	0.277988	1.12331	2.27468	26.0358
2160	1439.33	0.0581687	0.0208283	0.00300911	0.33	0.849121	0.266161	1.11528	1.45176	42.8752
2280	1439.33	0.0588898	0.020427	0.00226626	0.33	0.862119	0.261032	1.12315	1.09336	73.1768
2400	1439.33	0.0586733	0.0215464	0.00285871	0.33	0.857129	0.275337	1.13247	1.3792	39.9216
2520	1439.33	0.0576743	0.0227297	-0.00148964	0.33	0.838512	0.290459	1.12897	-0.718682	14.2296
2640	1439.33	0.0595027	0.0217765	-0.00584112	0.33	0.871358	0.278278	1.14964	-2.81807	54.1315
2760	1439.33	0.0575461	0.020597	0.00590042	0.33	0.838561	0.263205	1.10177	2.84668	34.8611
2880	1439.33	0.0586036	0.0209728	0.00475185	0.33	0.856535	0.268007	1.12454	2.29255	49.7953
3000	1439.33	0.0579793	0.0206172	0.00382593	0.33	0.846057	0.263463	1.10952	1.84584	42.9755
3120	1439.33	0.0583504	0.0213089	-0.000955342	0.33	0.851765	0.272302	1.12407	-0.460909	37.7822
3240	1439.33	0.0586835	0.0216215	0.0018759	0.33	0.857225	0.276296	1.13352	0.905035	38.8187
3360	1439.33	0.0571374	0.0210256	-0.00218419	0.33	0.831034	0.268682	1.09972	-1.05377	23.1222
3480	1439.33	0.0577789	0.0200005	0.00484016	0.33	0.843235	0.255582	1.09882	2.33516	51.8531
3600	1439.33	0.0575592	0.0199091	-0.00631762	0.33	0.839519	0.254414	1.09393	-3.04796	48.5263
3720	1439.33	0.0565182	0.0184248	9.55611e-05	0.33	0.823065	0.235446	1.05851	0.0461038	59.802
3840	1439.33	0.0552244	0.0188536	0.00378481	0.33	0.800362	0.240926	1.04129	1.82599	24.3465
3960	1439.33	0.0545104	0.017701	0.00161818	0.33	0.789309	0.226197	1.01551	0.780696	30.6984
4080	1439.33	0.0540912	0.0168962	0.00255352	0.33	0.782955	0.215913	0.998868	1.23196	38.4861
4200	1439.33	0.0530146	0.017143	0.00520998	0.33	0.764395	0.219067	0.983461	2.51358	18.3108
4320	1439.33	0.0531308	0.0151462	0.00156262	0.33	0.768325	0.19355	0.961876	0.753894	65.6106
4440	1439.33	0.0526367	0.0162844	0.00327992	0.33	0.758826	0.208095	0.966921	1.58241	24.6549
4560	1439.33	0.0525295	0.0169582	0.00349602	0.33	0.756358	0.216706	0.973064	1.68667	15.4335
4680	1439.33	0.0515876	0.0160821	0.00786719	0.33	0.741301	0.20551	0.946811	3.79555	15.1871
4800	1439.33	0.0512558	0.015395	0.00558123	0.33	0.736369	0.196729	0.933098	2.69269	19.4128
4920	1439.33	0.0515256	0.0156082	0.00594667	0.33	0.740709	0.199454	0.940163	2.86899	19.8158
5040	1439.33	0.0517476	0.0157382	0.00502768	0.33	0.744326	0.201116	0.945442	2.42562	20.7624
5160	1439.33	0.0519349	0.0167485	0.0067887	0.33	0.746518	0.214025	0.960543	3.27523	12.3418
5280	1439.33	0.0520578	0.0172158	0.00691149	0.33	0.748142	0.219997	0.968139	3.33447	10.0124
5400	1439.33	0.0527554	0.0172975	0.00316602	0.33	0.759851	0.221041	0.980892	1.52746	14.4018
0	1559.28	0.0601595	0.0212277	0.00720418	0.33	0.883479	0.271265	1.15474	3.47568	93.341
120	1559.28	0.0585704	0.0206495	0.00724193	0.33	0.856307	0.263876	1.12018	3.4939	56.6956
240	1559.28	0.0590052	0.0195001	0.00640574	0.33	0.865145	0.249188	1.11433	3.09047	118.213
360	1559.28	0.0586063	0.0186665	0.00665948	0.33	0.859079	0.238536	1.09761	3.21289	145.678
480	1559.28	0.0579584	0.0180799	-0.00125736	0.33	0.848408	0.231039	1.07945	-0.606618	143.552
600	1559.28	0.0580921	0.0181244	0.00578698	0.33	0.85069	0.231608	1.0823	2.79195	149.478
720	1559.28	0.0569407	0.018338	0.00609779	0.33	0.830462	0.234337	1.0648	2.9419	77.2108
840	1559.28	0.0567889	0.017075	0.00377163	0.33	0.829159	0.218198	1.04736	1.81964	138.173
960	1559.28	0.056208	0.0163783	0.00132248	0.33	0.819837	0.209294	1.02913	0.638035	152.337
1080	1559.28	0.0563864	0.0180015	0.00745252	0.33	0.821231	0.230037	1.05127	3.5955	69.6334
1200	1559.28	0.0566087	0.0166844	-0.001508	0.33	0.826447	0.213206	1.03965	-0.727539	156.253
1320	1559.28	0.0568129	0.0164959	0.00499225	0.33	0.830183	0.210797	1.04098	2.40853	190.66
1440	1559.28	0.0568664	0.0179936	0.00517097	0.33	0.829538	0.229936	1.05947	2.49475	88.7614
1560	1559.28	0.0577238	0.0190169	0.00279731	0.33	0.843327	0.243012	1.08634	1.34957	80.8801
1680	1559.28	0.0575806	0.0193505	0.00166737	0.33	0.840486	0.247276	1.08776	0.804427	64.1254
1800	1559.28	0.0589687	0.0203007	0.00476573	0.33	0.863635	0.259418	1.12305	2.29925	80.4615
1920	1559.28	0.0590253	0.0214889	0.0071536	0.33	0.863329	0.274602	1.13793	3.45128	48.6734
2040	1559.28	0.0572728	0.0209784	0.00309473	0.33	0.833426	0.268078	1.1015	1.49307	25.3648
2160	1559.28	0.058972	0.0213273	0.00585082	0.33	0.862575	0.272538	1.13511	2.82275	50.9159
2280	1559.28	0.0586754	0.0198676	0.00638515	0.33	0.858983	0.253884	1.11287	3.08054	85.3546
2400	1559.28	0.0582179	0.0227773	0.00224291	0.33	0.847881	0.291066	1.13895	1.0821	18.5323
2520	1559.28	0.0566451	0.0231347	0.00324255	0.33	0.820331	0.295633	1.11596	1.56438	6.80726
2640	1559.28	0.0582664	0.0220279	0.00283387	0.33	0.849529	0.28149	1.13102	1.36721	26.324
2760	1559.28	0.0590743	0.0213257	0.00541471	0.33	0.864363	0.272516	1.13688	2.61235	53.5497
2880	1559.28	0.0582565	0.0210672	0.00257972	0.33	0.850391	0.269213	1.1196	1.2446	40.1918
3000	1559.28	0.058635	0.0215487	0.00167823	0.33	0.856459	0.275367	1.13183	0.809667	39.1311
3120	1559.28	0.0574132	0.0219275	0.00594193	0.33	0.834848	0.280206	1.11505	2.86671	17.6917
3240	1559.28	0.0574141	0.0217265	0.00338979	0.33	0.835078	0.277638	1.11272	1.63542	19.3812
3360	1559.28	0.0579967	0.0207097	-0.00057748	0.33	0.84626	0.264644	1.1109	-0.278607	41.5445
3480	1559.28	0.0572128	0.020525	0.000303283	0.33	0.832867	0.262284	1.09515	0.14632	30.3976
3600	1559.28	0.0571498	0.0194285	0.0058789	0.33	0.832934	0.248273	1.08121	2.8363	49.8005
3720	1559.28	0.0553158	0.0190556	0.00427368	0.33	0.801723	0.243507	1.04523	2.06185	23.0333
3840	1559.28	0.0554012	0.0179618	0.00098747	0.33	0.804305	0.22953	1.03383	0.476409	42.8617
3960	1559.28	0.054765	0.0175088	0.00662562	0.33	0.793858	0.223741	1.0176	3.19656	39.1536
4080	1559.28	0.0535102	0.017393	0.00548869	0.33	0.772564	0.222262	0.994826	2.64804	20.9932
4200	1559.28	0.0527264	0.0166467	0.00531921	0.33	0.759993	0.212725	0.972718	2.56627	20.8382
4320	1559.28	0.0517552	0.0150699	0.00526232	0.33	0.745092	0.192575	0.937668	2.53882	32.1227
4440	1559.28	0.0521584	0.0149533	0.00574169	0.33	0.752017	0.191085	0.943102	2.7701	43.5477
4560	1559.28	0.051044	0.0145649	0.001073	0.33	0.73359	0.186121	0.919712	0.517674	29.8491
4680	1559.28	0.050982	0.0146508	0.000630736	0.33	0.732466	0.18722	0.919686	0.304301	27.1495
4800	1559.28	0.0504171	0.0146784	0.00524297	0.33	0.722959	0.187572	0.910531	2.52949	19.0429
4920	1559.28	0.050277	0.0146947	0.00257039	0.33	0.720597	0.187781	0.908379	1.24009	17.2987
5040	1559.28	0.0502097	0.0143576	0.00180897	0.33	0.719784	0.183472	0.903256	0.872745	21.0128
5160	1559.28	0.0510298	0.0156106	0.0078378	0.33	0.732366	0.199484	0.93185	3.78138	14.7308
5280	1559.28	0.0515901	0.0166671	0.00918767	0.33	0.740786	0.212985	0.953771	4.43263	10.5516
5400	1559.28	0.0517687	0.0172082	0.00706038	0.33	0.743276	0.219899	0.963176	3.40631	8.4489
0	1679.22	0.0581627	0.018296	0.00774893	0.33	0.851736	0.233801	1.08554	3.7385	141.928
120	1679.22	0.0573511	0.017206	0.00302786	0.33	0.838774	0.219872	1.05865	1.4608	168.481
240	1679.22	0.0558859	0.0176669	0.0097478	0.33	0.812946	0.225761	1.03871	4.70286	64.4804
360	1679.22	0.0564103	0.016212	0.00287428	0.33	0.823507	0.20717	1.03068	1.38671	184.005
480	1679.22	0.0556173	0.0166671	0.00690785	0.33	0.809349	0.212986	1.02233	3.33272	97.0438
600	1679.22	0.0549903	0.0157185	0.00973964	0.33	0.799535	0.200863	1.0004	4.69892	121.731
720	1679.22	0.0544372	0.0149909	0.00344095	0.33	0.790783	0.191565	0.982348	1.6601	142.438
840	1679.22	0.0540187	0.0151907	0.00705624	0.33	0.78342	0.194118	0.977538	3.40431	101.875
960	1679.22	0.0543378	0.0154709	0.0106064	0.33	0.788597	0.197699	0.986296	5.11712	101.275
1080	1679.22	0.0544327	0.014588	0.000663519	0.33	0.791109	0.186417	0.977526	0.320117	182.033
1200	1679.22	0.054287	0.0151331	0.00851226	0.33	0.788067	0.193383	0.98145	4.10677	121.059
1320	1679.22	0.0541915	0.0153784	0.00625566	0.33	0.786187	0.196518	0.982704	3.01806	99.3291
1440	1679.22	0.0543329	0.0154839	0.000548541	0.33	0.788501	0.197865	0.986366	0.264646	100.236
1560	1679.22	0.0551567	0.0168968	0.00564203	0.33	0.801194	0.21592	1.01711	2.72202	67.5601
1680	1679.22	0.0559863	0.0174316	0.0107218	0.33	0.814919	0.222754	1.03767	5.1728	76.9492
1800	1679.22	0.0567829	0.0178377	0.00578842	0.33	0.828256	0.227944	1.0562	2.79264	92.3347
1920	1679.22	0.0571403	0.018408	0.0079653	0.33	0.833846	0.235232	1.06908	3.84289	82.2301
2040	1679.22	0.0569919	0.0185607	0.0124089	0.33	0.831115	0.237183	1.0683	5.9867	70.7602
2160	1679.22	0.0568411	0.0188127	0.00787276	0.33	0.828241	0.240404	1.06864	3.79824	57.8155
2280	1679.22	0.0566126	0.0193063	0.0067423	0.33	0.823774	0.246711	1.07049	3.25285	40.2298
2400	1679.22	0.0572312	0.0190156	0.00983405	0.33	0.834779	0.242996	1.07778	4.74448	63.5232
2520	1679.22	0.0579008	0.019482	0.00255632	0.33	0.845908	0.248956	1.09486	1.23331	70.4418
2640	1679.22	0.0576041	0.0204144	0.00717635	0.33	0.839761	0.260872	1.10063	3.46226	39.1004
2760	1679.22	0.0569084	0.0190137	0.00389259	0.33	0.829193	0.242972	1.07216	1.87799	54.0957
2880	1679.22	0.0571838	0.0194936	0.00797419	0.33	0.833454	0.249105	1.08256	3.84718	49.0794
3000	1679.22	0.0577724	0.0200169	0.00643074	0.33	0.843104	0.255791	1.0989	3.10254	51.2862
3120	1679.22	0.0563186	0.0207371	0.00273588	0.33	0.817215	0.264995	1.08221	1.31994	17.1533
3240	1679.22	0.0567258	0.0198281	0.00449756	0.33	0.825183	0.253379	1.07856	2.16987	32.9965
3360	1679.22	0.0560285	0.0198928	0.0097436	0.33	0.8131	0.254206	1.06731	4.70084	22.1367
3480	1679.22	0.0562536	0.018357	0.00735497	0.33	0.818569	0.234581	1.05315	3.54844	54.1353
3600	1679.22	0.0557267	0.0193651	0.00568578	0.33	0.808456	0.247463	1.05592	2.74312	24.5277
3720	1679.22	0.0548926	0.0182673	0.00408357	0.33	0.795275	0.233434	1.02871	1.97014	27.7456
3840	1679.22	0.0545606	0.0173698	0.000781923	0.33	0.7905	0.221965	1.01247	0.377242	37.9107
3960	1679.22	0.0535384	0.0169186	0.00812641	0.33	0.773513	0.216199	0.989712	3.92062	28.0523
4080	1679.22	0.0532713	0.0169244	0.0106551	0.33	0.768966	0.216273	0.985239	5.14058	24.0787
4200	1679.22	0.0522188	0.0149024	0.00226504	0.33	0.753089	0.190435	0.943524	1.09278	46.5586
4320	1679.22	0.0517833	0.0147688	0.00967744	0.33	0.745855	0.188727	0.934582	4.66892	39.8018
4440	1679.22	0.0511655	0.014201	0.00794438	0.33	0.735977	0.181472	0.917449	3.83279	41.0884
4560	1679.22	0.0499234	0.0139435	0.00843629	0.33	0.715375	0.178181	0.893556	4.07012	23.7461
4680	1679.22	0.0492842	0.0135719	0.00870264	0.33	0.705045	0.173433	0.878478	4.19862	21.1356
4800	1679.22	0.04881	0.013089	0.00659096	0.33	0.697587	0.167262	0.864849	3.17983	22.7683
4920	1679.22	0.0485813	0.0127518	0.00264013	0.33	0.694088	0.162952	0.85704	1.27374	25.7243
5040	1679.22	0.0487944	0.0138309	0.005068	0.33	0.696658	0.176742	0.8734	2.44508	12.8286
5160	1679.22	0.0490015	0.0131127	-0.00320062	0.33	0.700753	0.167565	0.868318	-1.54415	25.1548
5280	1679.22	0.0504351	0.0138395	0.0059385	0.33	0.724042	0.176853	0.900894	2.86505	34.6845
5400	1679.22	0.0512961	0.0149174	0.00450224	0.33	0.7375	0.190626	0.928126	2.17212	27.2575
0	1799.17	0.0555542	0.0160863	0.00859767	0.33	0.808859	0.205564	1.01442	4.14798	130.36
120	1799.17	0.0547684	0.0150008	0.00156498	0.33	0.796452	0.191692	0.988144	0.755031	166.978
240	1799.17	0.0542126	0.0149818	0.0104141	0.33	0.786944	0.191449	0.978393	5.0243	127.876
360	1799.17	0.0543045	0.01498	0.0102536	0.33	0.788519	0.191426	0.979945	4.94686	134.115
480	1799.17	0.0533109	0.0133099	0.00687873	0.33	0.773197	0.170084	0.943281	3.31867	237.704
600	1799.17	0.0527959	0.0133681	0.0063948	0.33	0.764368	0.170828	0.935196	3.0852	176.14
720	1799.17	0.0526612	0.0130142	0.00961995	0.33	0.762422	0.166306	0.928727	4.64118	209.693
840	1799.17	0.0520804	0.0140388	0.00475496	0.33	0.751578	0.179399	0.930977	2.29405	76.5283
960	1799.17	0.0521249	0.0130603	0.0070335	0.33	0.753272	0.166894	0.920167	3.39334	153.93
1080	1799.17	0.0513444	0.0126782	0.00814903	0.33	0.740435	0.162012	0.902447	3.93153	133.857
1200	1799.17	0.0524149	0.0123934	0.00170079	0.33	0.758838	0.158372	0.917211	0.820552	286.835
1320	1799.17	0.0518492	0.0133711	0.0036858	0.33	0.748306	0.170866	0.919172	1.77823	106.919
1440	1799.17	0.0521813	0.0134509	0.00441343	0.33	0.753853	0.171887	0.92574	2.12927	120.769
1560	1799.17	0.0528164	0.0139886	0.00426021	0.33	0.764111	0.178757	0.942868	2.05536	117.299
1680	1799.17	0.0537926	0.0141383	0.00792393	0.33	0.780603	0.18067	0.961273	3.82293	175.612
1800	1799.17	0.0536888	0.0145218	0.00948811	0.33	0.778449	0.185572	0.96402	4.57757	130.443
1920	1799.17	0.0546626	0.0154972	0.00876471	0.33	0.794136	0.198036	0.992171	4.22857	117.619
2040	1799.17	0.0548643	0.0157651	0.00343019	0.33	0.797326	0.201458	0.998784	1.65491	111.187
2160	1799.17	0.0548901	0.0153606	0.000720292	0.33	0.798177	0.19629	0.994468	0.347508	142.98
2280	1799.17	0.0547408	0.015285	0.00238037	0.33	0.795692	0.195324	0.991016	1.14842	138.842
2400	1799.17	0.0554254	0.0161387	-0.00239703	0.33	0.806587	0.206233	1.01282	-1.15646	118.707
2520	1799.17	0.0555971	0.0177754	0.00388688	0.33	0.807863	0.227148	1.03501	1.87524	52.4546
2640	1799.17	0.0541583	0.0166151	0.000336438	0.33	0.784382	0.21232	0.996702	0.162316	46.9295
2760	1799.17	0.0549384	0.0164871	0.00168026	0.33	0.797865	0.210685	1.00855	0.810645	76.0754
2880	1799.17	0.055261	0.0171603	0.00192147	0.33	0.802717	0.219288	1.02201	0.927023	61.5941
3000	1799.17	0.0555786	0.0163599	-0.00204241	0.33	0.808998	0.209059	1.01806	-0.98537	113.037
3120	1799.17	0.055925	0.0184563	0.00525385	0.33	0.812804	0.235849	1.04865	2.53474	43.417
3240	1799.17	0.0552648	0.0173481	0.00417465	0.33	0.802591	0.221688	1.02428	2.01408	55.6573
3360	1799.17	0.0552654	0.0173797	0.00208393	0.33	0.802568	0.222092	1.02466	1.0054	54.7165
3480	1799.17	0.0544084	0.0164129	0.00224978	0.33	0.78886	0.209737	0.998597	1.08541	60.2549
3600	1799.17	0.0539724	0.0162247	0.00467461	0.33	0.781597	0.207331	0.988928	2.25528	53.3855
3720	1799.17	0.053849	0.0157139	0.00406516	0.33	0.780001	0.200805	0.980805	1.96125	67.8238
3840	1799.17	0.0528294	0.0156126	0.00248489	0.33	0.762748	0.19951	0.962258	1.19884	41.5738
3960	1799.17	0.0521965	0.0152296	0.00682536	0.33	0.752396	0.194616	0.947013	3.29292	37.2079
4080	1799.17	0.0521024	0.0140949	0.00456262	0.33	0.751896	0.180116	0.932012	2.20125	74.5699
4200	1799.17	0.0513022	0.013846	0.00647274	0.33	0.738616	0.176936	0.915552	3.1228	56.7951
4320	1799.17	0.0498973	0.0118471	0.00515059	0.33	0.716871	0.151391	0.868262	2.48492	114.187
4440	1799.17	0.0493946	0.0128553	0.0095531	0.33	0.707539	0.164276	0.871815	4.60893	38.8787
4560	1799.17	0.0489757	0.012728	0.00955152	0.33	0.700671	0.162649	0.86332	4.60817	33.3636
4680	1799.17	0.048076	0.0114323	-0.00145492	0.33	0.686876	0.146091	0.832967	-0.701932	55.8704
4800	1799.17	0.0472771	0.011471	0.0032374	0.33	0.673617	0.146586	0.820203	1.56189	33.0401
4920	1799.17	0.047053	0.0103335	0.00225517	0.33	0.670908	0.13205	0.802958	1.08802	80.3522
5040	1799.17	0.047388	0.0111197	0.00440514	0.33	0.675757	0.142096	0.817853	2.12528	48.2288
5160	1799.17	0.0473433	0.0103651	-0.00177035	0.33	0.675679	0.132453	0.808132	-0.854111	92.905
5280	1799.17	0.0485345	0.0123234	0.00520751	0.33	0.693695	0.157478	0.851173	2.51238	35.1929
5400	1799.17	0.0490186	0.0131539	0.0027625	0.33	0.700999	0.168091	0.86909	1.33278	24.6289
0	1919.11	0.0541785	0.0130371	0.00448033	0.33	0.788307	0.166598	0.954906	2.16155	434.325
120	1919.11	0.0531048	0.0133634	0.00147015	0.33	0.769631	0.170768	0.940399	0.709279	206.78
240	1919.11	0.0523826	0.0121434	-0.00348079	0.33	0.758531	0.155178	0.913709	-1.67932	337.966
360	1919.11	0.0515109	0.012102	-0.000583649	0.33	0.743795	0.154649	0.898445	-0.281584	223.739
480	1919.11	0.0509695	0.0141125	-0.00461036	0.33	0.732764	0.180341	0.913104	-2.22429	39.0367
600	1919.11	0.0494308	0.0109006	0.00327888	0.33	0.709929	0.139297	0.849225	1.58191	191.15
720	1919.11	0.0495937	0.0107021	0.00197527	0.33	0.712837	0.136759	0.849597	0.952976	246.88
840	1919.11	0.0496318	0.010556	0.00063619	0.33	0.713609	0.134893	0.848502	0.306932	285.174
960	1919.11	0.0494185	0.0110113	0.00400826	0.33	0.709621	0.140711	0.850332	1.9338	173.013
1080	1919.11	0.0487459	0.0111197	0.00314459	0.33	0.698294	0.142097	0.84039	1.51712	108.158
1200	1919.11	0.0489685	0.0106484	0.00191224	0.33	0.702432	0.136073	0.838505	0.922565	183.723
1320	1919.11	0.0493131	0.0105661	-0.00315988	0.33	0.708263	0.135023	0.843286	-1.5245	238.212
1440	1919.11	0.049619	0.0119232	0.00686166	0.33	0.712142	0.152365	0.864506	3.31043	91.8894
1560	1919.11	0.049973	0.0113203	0.00614604	0.33	0.718626	0.14466	0.863286	2.96518	181.635
1680	1919.11	0.0502928	0.0117988	0.00694686	0.33	0.723552	0.150774	0.874326	3.35154	147.56
1800	1919.11	0.0516017	0.0115946	-0.00447145	0.33	0.745815	0.148165	0.89398	-2.15727	343.566
1920	1919.11	0.0518008	0.0135784	0.00670749	0.33	0.747289	0.173515	0.920804	3.23605	90.1359
2040	1919.11	0.0521214	0.0127633	0.000641406	0.33	0.753499	0.163099	0.916598	0.309449	189.6
2160	1919.11	0.0530674	0.0138581	0.00825256	0.33	0.768509	0.177089	0.945598	3.98148	145.733
2280	1919.11	0.0531073	0.0141843	0.0100886	0.33	0.768868	0.181259	0.950126	4.86726	120.039
2400	1919.11	0.0536338	0.0149269	0.00714022	0.33	0.777108	0.190748	0.967856	3.44483	98.2412
2520	1919.11	0.0538462	0.0150597	0.00125837	0.33	0.780603	0.192445	0.973048	0.607107	101.006
2640	1919.11	0.0539747	0.0146708	0.00837949	0.33	0.783186	0.187476	0.970661	4.04272	137.406
2760	1919.11	0.0535569	0.0149195	0.00663143	0.33	0.775805	0.190653	0.966458	3.19936	94.8169
2880	1919.11	0.053506	0.0155224	0.0041073	0.33	0.774342	0.198358	0.972699	1.98158	63.5041
3000	1919.11	0.0532864	0.0144636	0.00360081	0.33	0.771645	0.184827	0.956472	1.73722	109.969
3120	1919.11	0.0529268	0.0142273	0.00325519	0.33	0.765755	0.181808	0.947563	1.57048	106.19
3240	1919.11	0.0534952	0.0148635	-0.00713217	0.33	0.774809	0.189938	0.964747	-3.44094	95.0932
3360	1919.11	0.052902	0.0149501	9.92119e-05	0.33	0.764627	0.191045	0.955672	0.0478652	65.6711
3480	1919.11	0.0528419	0.0147491	0.00509071	0.33	0.763803	0.188476	0.952279	2.45603	72.32
3600	1919.11	0.0522419	0.0141159	0.00566667	0.33	0.754238	0.180384	0.934622	2.73391	79.3117
3720	1919.11	0.0515791	0.0135121	0.00762346	0.33	0.743606	0.172668	0.916274	3.67797	83.6512
3840	1919.11	0.0509894	0.013379	0.00644603	0.33	0.733789	0.170967	0.904756	3.10991	66.2961
3960	1919.11	0.0505486	0.0126407	0.00186372	0.33	0.727066	0.161532	0.888598	0.899158	89.0416
4080	1919.11	0.0490943	0.011919	0.00327024	0.33	0.70338	0.152311	0.855691	1.57774	68.1625
4200	1919.11	0.0487141	0.0112628	0.0043177	0.33	0.697636	0.143925	0.841561	2.08309	94.0584
4320	1919.11	0.0481361	0.0114124	0.00128228	0.33	0.687891	0.145837	0.833728	0.618638	58.9169
4440	1919.11	0.0478555	0.0102961	0.00373995	0.33	0.684223	0.131572	0.815795	1.80435	133.727
4560	1919.11	0.0467064	0.0098694	-0.00148138	0.33	0.665589	0.126119	0.791708	-0.714699	101.318
4680	1919.11	0.0462934	0.00973517	0.00635913	0.33	0.658903	0.124404	0.783306	3.06799	89.905
4800	1919.11	0.0453435	0.00904822	0.00517106	0.33	0.643892	0.115625	0.759518	2.4948	101.069
4920	1919.11	0.0451731	0.00916749	0.00115165	0.33	0.641005	0.117149	0.758155	0.555618	80.0512
5040	1919.11	0.0451452	0.00847271	0.00521138	0.33	0.641129	0.108271	0.7494	2.51425	166.831
5160	1919.11	0.045589	0.00905538	0.00507176	0.33	0.64791	0.115717	0.763627	2.44689	116.736
5280	1919.11	0.0455745	0.00999516	0.00408402	0.33	0.646882	0.127726	0.774608	1.97035	44.2216
5400	1919.11	0.0459226	0.0101937	0.00530931	0.33	0.65242	0.130263	0.782683	2.5615	45.4657
0	2039.06	0.0515842	0.0111741	0.0061484	0.33	0.74592	0.142791	0.888711	2.96632	470.392
120	2039.06	0.051874	0.0121452	0.00150493	0.33	0.749901	0.155201	0.905102	0.726058	261.236
240	2039.06	0.0502594	0.00989121	-0.00793448	0.33	0.724762	0.126398	0.85116	-3.82802	694.904
360	2039.06	0.0494889	0.0104189	-0.000682622	0.33	0.711341	0.13314	0.844481	-0.329334	297.139
480	2039.06	0.0485006	0.0132052	0.00304997	0.33	0.692342	0.168747	0.861089	1.47147	17.1528
600	2039.06	0.0480397	0.0111024	0.00424966	0.33	0.686567	0.141875	0.828442	2.05027	72.6611
720	2039.06	0.0481121	0.00909162	0.00460798	0.33	0.689555	0.11618	0.805735	2.22313	476.963
840	2039.06	0.0476132	0.00857294	0.00321263	0.33	0.681722	0.109552	0.791274	1.54995	609.787
960	2039.06	0.0476111	0.00874764	0.00704491	0.33	0.681533	0.111784	0.793317	3.39884	511.218
1080	2039.06	0.0470607	0.007725	-0.00195056	0.33	0.673301	0.0987161	0.772017	-0.941056	1104.88
1200	2039.06	0.0472094	0.00863254	0.000827044	0.33	0.674975	0.110313	0.785288	0.399011	462.08
1320	2039.06	0.0474473	0.00879425	0.00791892	0.33	0.678775	0.11238	0.791155	3.82051	446.667
1440	2039.06	0.0477359	0.00838655	0.00520062	0.33	0.683924	0.10717	0.791093	2.50906	785.03
1560	2039.06	0.0482814	0.00921684	0.00712279	0.33	0.692261	0.11778	0.810041	3.43641	462.987
1680	2039.06	0.0475985	0.008488	-0.00427449	0.33	0.681552	0.108466	0.790019	-2.06224	659.254
1800	2039.06	0.0488234	0.0105867	0.00499901	0.33	0.700066	0.135285	0.835351	2.41179	178.807
1920	2039.06	0.0492874	0.0109178	0.00673878	0.33	0.707514	0.139517	0.847031	3.25115	174.102
2040	2039.06	0.0502635	0.011335	0.00639194	0.33	0.72349	0.144847	0.868337	3.08382	209.926
2160	2039.06	0.0507136	0.0125077	0.00654203	0.33	0.729964	0.159834	0.889798	3.15623	107.805
2280	2039.06	0.0506998	0.0122166	0.00413942	0.33	0.730005	0.156114	0.886119	1.99708	133.344
2400	2039.06	0.0517012	0.0122847	0.00529641	0.33	0.746841	0.156983	0.903824	2.55527	215.687
2520	2039.06	0.0516623	0.0135741	0.0049699	0.33	0.744952	0.17346	0.918412	2.39774	83.8313
2640	2039.06	0.0510128	0.0120311	0.00259313	0.33	0.735451	0.153743	0.889194	1.25107	181.696
2760	2039.06	0.0513785	0.0123654	0.00572261	0.33	0.741308	0.158015	0.899322	2.7609	171.614
2880	2039.06	0.0509773	0.0136275	0.00373986	0.33	0.73335	0.174143	0.907493	1.80431	55.1394
3000	2039.06	0.0509388	0.0125981	-0.00392187	0.33	0.733672	0.160988	0.89466	-1.89212	114.01
3120	2039.06	0.0515678	0.0129915	0.00232977	0.33	0.74391	0.166015	0.909926	1.124	120.271
3240	2039.06	0.0506736	0.013508	0.00517622	0.33	0.728355	0.172616	0.900971	2.49728	50.5147
3360	2039.06	0.0505035	0.0137818	0.00379097	0.33	0.725243	0.176115	0.901358	1.82897	37.6205
3480	2039.06	0.0501391	0.0118735	0.00102407	0.33	0.720902	0.151729	0.872631	0.494065	127.896
3600	2039.06	0.0498381	0.0116226	0.00401425	0.33	0.716087	0.148523	0.864609	1.93669	132.168
3720	2039.06	0.0489922	0.0112334	0.00511992	0.33	0.702297	0.143549	0.845846	2.47012	113.104
3840	2039.06	0.0483851	0.0103395	0.00559246	0.33	0.692986	0.132126	0.825112	2.69811	173.99
3960	2039.06	0.0477284	0.00993502	0.0027405	0.33	0.682434	0.126958	0.809392	1.32217	173.441
4080	2039.06	0.0473871	0.0102853	0.00523046	0.33	0.676472	0.131433	0.807905	2.52345	102.66
4200	2039.06	0.0464768	0.00952721	0.00344753	0.33	0.6621	0.121746	0.783846	1.66328	123.458
4320	2039.06	0.0464802	0.0097242	0.00103942	0.33	0.661987	0.124263	0.786251	0.50147	101.827
4440	2039.06	0.0457412	0.0099282	0.00105271	0.33	0.649669	0.12687	0.77654	0.507882	52.5947
4560	2039.06	0.0453254	0.00880897	0.00414523	0.33	0.643798	0.112568	0.756365	1.99988	129.06
4680	2039.06	0.0444202	0.00757116	0.00160471	0.33	0.630028	0.0967503	0.726779	0.774196	304.39
4800	2039.06	0.0446014	0.00840926	0.00526285	0.33	0.632294	0.10746	0.739755	2.53908	128.099
4920	2039.06	0.0439511	0.00747216	0.00184202	0.33	0.622467	0.0954851	0.717952	0.88869	258.681
5040	2039.06	0.0435441	0.00779247	0.00474718	0.33	0.615596	0.0995784	0.715174	2.2903	135.55
5160	2039.06	0.0438933	0.00850645	0.00796279	0.33	0.620687	0.108702	0.72939	3.84168	72.9122
5280	2039.06	0.0437966	0.00794172	0.0013566	0.33	0.619574	0.101486	0.721059	0.654498	132.916
5400	2039.06	0.0439584	0.00852764	0.00204206	0.33	0.621728	0.108973	0.730701	0.985197	74.251
0	2159	0.0519491	0.0117198	0.00824949	0.33	0.751581	0.149765	0.901347	3.98	372.101
120	2159	0.0507587	0.0115799	0.00509346	0.33	0.731593	0.147977	0.87957	2.45736	224.921
240	2159	0.0502005	0.0130504	0.00502628	0.33	0.720841	0.166768	0.887609	2.42495	53.8054
360	2159	0.049792	0.0137127	0.00281325	0.33	0.713392	0.175232	0.888623	1.35726	25.9425
480	2159	0.048806	0.0166185	0.00232846	0.33	0.694338	0.212365	0.906703	1.12337	1.81601
600	2159	0.0480217	0.0136831	0.00456435	0.33	0.683979	0.174854	0.858833	2.20209	8.71728
720	2159	0.0471339	0.00897509	0.00367293	0.33	0.673425	0.114691	0.788116	1.77202	313.506
840	2159	0.0470803	0.0079177	-0.00200844	0.33	0.673459	0.101179	0.774637	-0.968979	908.122
960	2159	0.0464641	0.00872749	0.00469184	0.33	0.662577	0.111527	0.774104	2.2636	276.363
1080	2159	0.0466653	0.00832486	-0.00263339	0.33	0.666243	0.106382	0.772624	-1.27049	471.975
1200	2159	0.0466106	0.00757801	0.00267625	0.33	0.665983	0.0968378	0.762821	1.29117	1027.17
1320	2159	0.0466203	0.00832361	0.00449246	0.33	0.665501	0.106366	0.771867	2.16741	461.023
1440	2159	0.0461733	0.00912833	0.0064171	0.33	0.657445	0.116649	0.774094	3.09595	154.078
1560	2159	0.0465179	0.00813913	0.00483507	0.33	0.663969	0.104008	0.767978	2.3327	530.474
1680	2159	0.0466022	0.00871819	0.00728455	0.33	0.664864	0.111408	0.776272	3.51446	301.899
1800	2159	0.047004	0.00885481	0.00248206	0.33	0.671383	0.113154	0.784536	1.19748	329.133
1920	2159	0.0481174	0.00892878	0.00449234	0.33	0.689787	0.114099	0.803886	2.16735	559.838
2040	2159	0.0480491	0.00988191	0.00540191	0.33	0.687805	0.126279	0.814084	2.60617	218.473
2160	2159	0.048842	0.00949651	-0.000875324	0.33	0.701359	0.121354	0.822712	-0.422303	479.207
2280	2159	0.0496736	0.00987554	0.000483066	0.33	0.714933	0.126197	0.84113	0.233057	524.476
[truncated: 26 more rows]

## Sheet: P10E
X (microns)	Y (microns)	A4520 (OH)	A5230 (H2Om)	A2350 (CO2)	thickness (mm)	[OH] wt%	[H2Om] wt%	[H2Ot] wt%	[CO2] ppm	Q (K/s)
[truncated: 1,080 more rows]

[truncated: 1 more sheets: P10I]
